# Supplementary material
Source: publisher figshare collection journal article supplement (https://acs.figshare.com/ndownloader/files/5361083)
Supplement: Supplementary file 1 [file 5361083]

data_Compound1
_audit_creation_date              2016-03-16
_audit_creation_method
;
Olex2 1.2
(compiled 2016.02.19 svn.r3266 for OlexSys, GUI svn.r5155)
;
_publ_contact_author_address      ?
_publ_contact_author_email        ?
_publ_contact_author_name         ''
_publ_contact_author_phone        ?
_publ_section_references
;
Dolomanov, O.V., Bourhis, L.J., Gildea, R.J, Howard, J.A.K. & Puschmann, H.
 (2009), J. Appl. Cryst. 42, 339-341.

Sheldrick, G.M. (2015). Acta Cryst. A71, 3-8.

Sheldrick, G.M. (2015). Acta Cryst. C71, 3-8.
;
_chemical_name_common             ?
_chemical_name_systematic         ?
_chemical_formula_moiety          'C17 H21 N Se2'
_chemical_formula_sum             'C17 H21 N Se2'
_chemical_formula_weight          397.27
_chemical_melting_point           ?
loop_
  _atom_type_symbol
  _atom_type_description
  _atom_type_scat_dispersion_real
  _atom_type_scat_dispersion_imag
  _atom_type_scat_source
 'C' 'C' 0.0033 0.0016 'International Tables Vol C Tables 4.2.6.8 and 6.1.1.4'
 'H' 'H' 0.0000 0.0000 'International Tables Vol C Tables 4.2.6.8 and 6.1.1.4'
 'N' 'N' 0.0061 0.0033 'International Tables Vol C Tables 4.2.6.8 and 6.1.1.4'
 'Se' 'Se' -0.0929 2.2259
 'International Tables Vol C Tables 4.2.6.8 and 6.1.1.4'

_shelx_space_group_comment
;
The symmetry employed for this shelxl refinement is uniquely defined
by the following loop, which should always be used as a source of
symmetry information in preference to the above space-group names.
They are only intended as comments.
;
_space_group_crystal_system       'monoclinic'
_space_group_IT_number            14
_space_group_name_H-M_alt         'P 1 21/c 1'
_space_group_name_Hall            '-P 2ybc'
loop_
  _space_group_symop_operation_xyz
 'x, y, z'
 '-x, y+1/2, -z+1/2'
 '-x, -y, -z'
 'x, -y-1/2, z-1/2'

_cell_length_a                    14.5262(10)
_cell_length_b                    8.1591(6)
_cell_length_c                    14.4769(10)
_cell_angle_alpha                 90
_cell_angle_beta                  100.438(4)
_cell_angle_gamma                 90
_cell_volume                      1687.4(2)
_cell_formula_units_Z             4
_cell_measurement_reflns_used     8773
_cell_measurement_temperature     294(2)
_cell_measurement_theta_max       26.55
_cell_measurement_theta_min       2.86
_shelx_estimated_absorpt_T_max    ?
_shelx_estimated_absorpt_T_min    ?
_exptl_absorpt_coefficient_mu     4.373
_exptl_absorpt_correction_T_max   0.7459
_exptl_absorpt_correction_T_min   0.5627
_exptl_absorpt_correction_type    multi-scan
_exptl_absorpt_process_details
;
SADABS-2014/5 (Bruker,2014/5) was used for absorption correction.
wR2(int) was 0.1030 before and 0.0494 after correction.
The Ratio of minimum to maximum transmission is 0.7544.
The \l/2 correction factor is Not present.
;
_exptl_absorpt_special_details    ?
_exptl_crystal_colour             ?
_exptl_crystal_density_diffrn     1.564
_exptl_crystal_density_meas       ?
_exptl_crystal_density_method     ?
_exptl_crystal_description        block
_exptl_crystal_F_000              792
_exptl_crystal_recrystallization_method ?
_exptl_crystal_size_max           0.2
_exptl_crystal_size_mid           0.2
_exptl_crystal_size_min           0.15
_exptl_transmission_factor_max    ?
_exptl_transmission_factor_min    ?
_diffrn_reflns_av_R_equivalents   0.0515
_diffrn_reflns_av_unetI/netI      0.0273
_diffrn_reflns_Laue_measured_fraction_full 1.000
_diffrn_reflns_Laue_measured_fraction_max 1.000
_diffrn_reflns_limit_h_max        18
_diffrn_reflns_limit_h_min        -18
_diffrn_reflns_limit_k_max        10
_diffrn_reflns_limit_k_min        -10
_diffrn_reflns_limit_l_max        18
_diffrn_reflns_limit_l_min        -18
_diffrn_reflns_number             25900
_diffrn_reflns_point_group_measured_fraction_full 1.000
_diffrn_reflns_point_group_measured_fraction_max 1.000
_diffrn_reflns_theta_full         26.000
_diffrn_reflns_theta_max          26.366
_diffrn_reflns_theta_min          2.852
_diffrn_ambient_temperature       294.64
_diffrn_detector_area_resol_mean  ?
_diffrn_measured_fraction_theta_full 1.000
_diffrn_measured_fraction_theta_max 1.000
_diffrn_measurement_device_type   'Bruker APEX-II CCD'
_diffrn_measurement_method        '\f and \w scans'
_diffrn_radiation_type            MoK\a
_diffrn_radiation_wavelength      0.71073
_diffrn_source                    ?
_diffrn_standards_number          0
_reflns_Friedel_coverage          0.000
_reflns_Friedel_fraction_full     .
_reflns_Friedel_fraction_max      .
_reflns_number_gt                 2567
_reflns_number_total              3455
_reflns_special_details
;
 Reflections were merged by SHELXL according to the crystal
 class for the calculation of statistics and refinement.
 
 _reflns_Friedel_fraction is defined as the number of unique
 Friedel pairs measured divided by the number that would be
 possible theoretically, ignoring centric projections and
 systematic absences.
;
_reflns_threshold_expression      'I > 2\s(I)'
_computing_cell_refinement        ?
_computing_data_collection        ?
_computing_data_reduction         ?
_computing_molecular_graphics     'Olex2 (Dolomanov et al., 2009)'
_computing_publication_material   'Olex2 (Dolomanov et al., 2009)'
_computing_structure_refinement   'ShelXL (Sheldrick, 2015)'
_computing_structure_solution     'ShelXT (Sheldrick, 2015)'
_refine_diff_density_max          0.525
_refine_diff_density_min          -0.555
_refine_diff_density_rms          0.064
_refine_ls_extinction_coef        .
_refine_ls_extinction_method      none
_refine_ls_goodness_of_fit_ref    1.057
_refine_ls_hydrogen_treatment     constr
_refine_ls_matrix_type            full
_refine_ls_number_parameters      186
_refine_ls_number_reflns          3455
_refine_ls_number_restraints      0
_refine_ls_R_factor_all           0.0570
_refine_ls_R_factor_gt            0.0335
_refine_ls_restrained_S_all       1.057
_refine_ls_shift/su_max           0.001
_refine_ls_shift/su_mean          0.000
_refine_ls_structure_factor_coef  Fsqd
_refine_ls_weighting_details
'w=1/[\s^2^(Fo^2^)+(0.0327P)^2^+1.3426P] where P=(Fo^2^+2Fc^2^)/3'
_refine_ls_weighting_scheme       calc
_refine_ls_wR_factor_gt           0.0727
_refine_ls_wR_factor_ref          0.0822
_refine_special_details           ?
_olex2_refinement_description
;
1. Fixed Uiso
 At 1.2 times of:
  All C(H) groups
 At 1.5 times of:
  All C(H,H,H) groups
2.a Aromatic/amide H refined with riding coordinates:
 C3(H3), C4(H4), C6(H6), C11(H11), C12(H12), C14(H14)
2.b Idealised Me refined as rotating group:
 C1(H1A,H1B,H1C), C8(H8A,H8B,H8C), C9(H9A,H9B,H9C), C16(H16A,H16B,H16C),
 C17(H17A,H17B,H17C)
;
_atom_sites_solution_hydrogens    geom
_atom_sites_solution_primary      direct
_atom_sites_solution_secondary    ?
loop_
  _atom_site_label
  _atom_site_type_symbol
  _atom_site_fract_x
  _atom_site_fract_y
  _atom_site_fract_z
  _atom_site_U_iso_or_equiv
  _atom_site_adp_type
  _atom_site_occupancy
  _atom_site_site_symmetry_order
  _atom_site_calc_flag
  _atom_site_refinement_flags_posn
  _atom_site_refinement_flags_adp
  _atom_site_refinement_flags_occupancy
  _atom_site_disorder_assembly
  _atom_site_disorder_group
 Se1 Se 0.85665(3) 0.78995(5) 0.25753(2) 0.05883(13) Uani 1 1 d . . . . .
 Se2 Se 0.74236(3) 0.36374(5) 0.28660(3) 0.06288(14) Uani 1 1 d . . . . .
 N1 N 0.74294(18) 0.6747(4) 0.40258(17) 0.0481(7) Uani 1 1 d . . . . .
 C1 C 0.7115(3) 0.5797(6) 0.4777(3) 0.0762(12) Uani 1 1 d . . . . .
 H1A H 0.7625 0.5677 0.5296 0.114 Uiso 1 1 calc GR . . . .
 H1B H 0.6907 0.4734 0.4542 0.114 Uiso 1 1 calc GR . . . .
 H1C H 0.6608 0.6362 0.4982 0.114 Uiso 1 1 calc GR . . . .
 C2 C 0.7897(2) 0.8239(4) 0.4302(2) 0.0450(8) Uani 1 1 d . . . . .
 C3 C 0.7874(3) 0.8981(5) 0.5158(2) 0.0624(10) Uani 1 1 d . . . . .
 H3 H 0.7530 0.8501 0.5568 0.075 Uiso 1 1 calc R . . . .
 C4 C 0.8355(3) 1.0426(6) 0.5415(3) 0.0650(11) Uani 1 1 d . . . . .
 H4 H 0.8338 1.0881 0.6000 0.078 Uiso 1 1 calc R . . . .
 C5 C 0.8853(3) 1.1196(5) 0.4825(3) 0.0581(9) Uani 1 1 d . . . . .
 C6 C 0.8890(2) 1.0447(5) 0.3978(2) 0.0517(8) Uani 1 1 d . . . . .
 H6 H 0.9228 1.0948 0.3568 0.062 Uiso 1 1 calc R . . . .
 C7 C 0.8445(2) 0.8990(4) 0.3717(2) 0.0418(7) Uani 1 1 d . . . . .
 C8 C 0.9360(3) 1.2805(5) 0.5087(3) 0.0841(14) Uani 1 1 d . . . . .
 H8A H 1.0004 1.2697 0.5024 0.126 Uiso 1 1 calc GR . . . .
 H8B H 0.9327 1.3079 0.5725 0.126 Uiso 1 1 calc GR . . . .
 H8C H 0.9071 1.3657 0.4677 0.126 Uiso 1 1 calc GR . . . .
 C9 C 0.9554(3) 0.9150(6) 0.2209(3) 0.0901(15) Uani 1 1 d . . . . .
 H9A H 0.9675 0.8752 0.1619 0.135 Uiso 1 1 calc GR . . . .
 H9B H 1.0110 0.9045 0.2678 0.135 Uiso 1 1 calc GR . . . .
 H9C H 0.9373 1.0283 0.2148 0.135 Uiso 1 1 calc GR . . . .
 C10 C 0.6743(2) 0.6813(4) 0.3174(2) 0.0430(7) Uani 1 1 d . . . . .
 C11 C 0.6192(2) 0.8172(5) 0.2963(2) 0.0535(9) Uani 1 1 d . . . . .
 H11 H 0.6254 0.9046 0.3382 0.064 Uiso 1 1 calc R . . . .
 C12 C 0.5540(2) 0.8272(5) 0.2130(3) 0.0581(10) Uani 1 1 d . . . . .
 H12 H 0.5179 0.9214 0.1997 0.070 Uiso 1 1 calc R . . . .
 C13 C 0.5426(2) 0.6992(5) 0.1509(2) 0.0541(9) Uani 1 1 d . . . . .
 C14 C 0.5976(2) 0.5603(4) 0.1733(2) 0.0506(8) Uani 1 1 d . . . . .
 H14 H 0.5901 0.4721 0.1320 0.061 Uiso 1 1 calc R . . . .
 C15 C 0.6631(2) 0.5497(4) 0.2555(2) 0.0438(7) Uani 1 1 d . . . . .
 C16 C 0.4725(3) 0.7086(6) 0.0599(3) 0.0801(13) Uani 1 1 d . . . . .
 H16A H 0.5047 0.6997 0.0078 0.120 Uiso 1 1 calc GR . . . .
 H16B H 0.4400 0.8115 0.0567 0.120 Uiso 1 1 calc GR . . . .
 H16C H 0.4283 0.6205 0.0575 0.120 Uiso 1 1 calc GR . . . .
 C17 C 0.6850(3) 0.2122(5) 0.1910(3) 0.0806(13) Uani 1 1 d . . . . .
 H17A H 0.6904 0.2539 0.1303 0.121 Uiso 1 1 calc GR . . . .
 H17B H 0.6200 0.1993 0.1946 0.121 Uiso 1 1 calc GR . . . .
 H17C H 0.7159 0.1080 0.2007 0.121 Uiso 1 1 calc GR . . . .

loop_
  _atom_site_aniso_label
  _atom_site_aniso_U_11
  _atom_site_aniso_U_22
  _atom_site_aniso_U_33
  _atom_site_aniso_U_23
  _atom_site_aniso_U_13
  _atom_site_aniso_U_12
 Se1 0.0693(2) 0.0688(3) 0.0439(2) -0.01591(18) 0.02486(16) -0.01380(19)
 Se2 0.0679(2) 0.0529(2) 0.0638(3) 0.00736(19) 0.00114(18) 0.01359(19)
 N1 0.0497(15) 0.0599(19) 0.0355(14) 0.0068(13) 0.0100(11) -0.0031(13)
 C1 0.089(3) 0.092(3) 0.050(2) 0.015(2) 0.020(2) -0.020(3)
 C2 0.0450(17) 0.058(2) 0.0309(15) -0.0019(15) 0.0043(12) 0.0069(15)
 C3 0.064(2) 0.086(3) 0.0396(19) -0.0055(19) 0.0169(16) 0.007(2)
 C4 0.072(2) 0.082(3) 0.0389(19) -0.021(2) 0.0027(17) 0.011(2)
 C5 0.059(2) 0.058(2) 0.050(2) -0.0126(19) -0.0095(16) 0.0139(18)
 C6 0.0527(19) 0.058(2) 0.0423(18) -0.0027(17) 0.0040(14) 0.0009(17)
 C7 0.0430(17) 0.051(2) 0.0295(15) -0.0034(14) 0.0021(12) 0.0065(14)
 C8 0.099(3) 0.065(3) 0.076(3) -0.027(2) -0.015(2) 0.001(3)
 C9 0.100(3) 0.106(4) 0.078(3) -0.010(3) 0.054(3) -0.024(3)
 C10 0.0347(15) 0.051(2) 0.0443(17) 0.0035(15) 0.0111(13) 0.0016(14)
 C11 0.0455(18) 0.059(2) 0.058(2) -0.0155(18) 0.0137(16) 0.0055(16)
 C12 0.0444(19) 0.060(2) 0.068(2) -0.002(2) 0.0036(17) 0.0143(16)
 C13 0.0455(18) 0.062(2) 0.053(2) 0.0003(19) 0.0030(15) 0.0056(17)
 C14 0.0528(19) 0.047(2) 0.0500(19) -0.0021(16) 0.0039(15) 0.0004(16)
 C15 0.0428(17) 0.0428(19) 0.0462(18) 0.0042(15) 0.0095(14) 0.0003(14)
 C16 0.072(3) 0.084(3) 0.072(3) -0.002(2) -0.020(2) 0.019(2)
 C17 0.090(3) 0.049(2) 0.099(3) -0.008(2) 0.004(3) 0.003(2)

_geom_special_details
;
 All esds (except the esd in the dihedral angle between two l.s. planes)
 are estimated using the full covariance matrix.  The cell esds are taken
 into account individually in the estimation of esds in distances, angles
 and torsion angles; correlations between esds in cell parameters are only
 used when they are defined by crystal symmetry.  An approximate (isotropic)
 treatment of cell esds is used for estimating esds involving l.s. planes.
;
loop_
  _geom_bond_atom_site_label_1
  _geom_bond_atom_site_label_2
  _geom_bond_distance
  _geom_bond_site_symmetry_2
  _geom_bond_publ_flag
 Se1 C7 1.914(3) . ?
 Se1 C9 1.912(4) . ?
 Se2 C15 1.908(3) . ?
 Se2 C17 1.929(4) . ?
 N1 C1 1.474(4) . ?
 N1 C2 1.416(4) . ?
 N1 C10 1.439(4) . ?
 C1 H1A 0.9600 . ?
 C1 H1B 0.9600 . ?
 C1 H1C 0.9600 . ?
 C2 C3 1.384(4) . ?
 C2 C7 1.403(4) . ?
 C3 H3 0.9300 . ?
 C3 C4 1.386(6) . ?
 C4 H4 0.9300 . ?
 C4 C5 1.368(6) . ?
 C5 C6 1.381(5) . ?
 C5 C8 1.519(5) . ?
 C6 H6 0.9300 . ?
 C6 C7 1.373(5) . ?
 C8 H8A 0.9600 . ?
 C8 H8B 0.9600 . ?
 C8 H8C 0.9600 . ?
 C9 H9A 0.9600 . ?
 C9 H9B 0.9600 . ?
 C9 H9C 0.9600 . ?
 C10 C11 1.370(5) . ?
 C10 C15 1.390(5) . ?
 C11 H11 0.9300 . ?
 C11 C12 1.394(5) . ?
 C12 H12 0.9300 . ?
 C12 C13 1.369(5) . ?
 C13 C14 1.390(5) . ?
 C13 C16 1.514(5) . ?
 C14 H14 0.9300 . ?
 C14 C15 1.385(4) . ?
 C16 H16A 0.9600 . ?
 C16 H16B 0.9600 . ?
 C16 H16C 0.9600 . ?
 C17 H17A 0.9600 . ?
 C17 H17B 0.9600 . ?
 C17 H17C 0.9600 . ?

loop_
  _geom_angle_atom_site_label_1
  _geom_angle_atom_site_label_2
  _geom_angle_atom_site_label_3
  _geom_angle
  _geom_angle_site_symmetry_1
  _geom_angle_site_symmetry_3
  _geom_angle_publ_flag
 C9 Se1 C7 100.51(17) . . ?
 C15 Se2 C17 100.16(16) . . ?
 C2 N1 C1 116.1(3) . . ?
 C2 N1 C10 115.6(3) . . ?
 C10 N1 C1 113.1(3) . . ?
 N1 C1 H1A 109.5 . . ?
 N1 C1 H1B 109.5 . . ?
 N1 C1 H1C 109.5 . . ?
 H1A C1 H1B 109.5 . . ?
 H1A C1 H1C 109.5 . . ?
 H1B C1 H1C 109.5 . . ?
 C3 C2 N1 122.7(3) . . ?
 C3 C2 C7 117.2(3) . . ?
 C7 C2 N1 120.0(3) . . ?
 C2 C3 H3 119.3 . . ?
 C2 C3 C4 121.3(4) . . ?
 C4 C3 H3 119.3 . . ?
 C3 C4 H4 119.3 . . ?
 C5 C4 C3 121.4(3) . . ?
 C5 C4 H4 119.3 . . ?
 C4 C5 C6 117.5(4) . . ?
 C4 C5 C8 122.0(4) . . ?
 C6 C5 C8 120.6(4) . . ?
 C5 C6 H6 118.8 . . ?
 C7 C6 C5 122.4(3) . . ?
 C7 C6 H6 118.8 . . ?
 C2 C7 Se1 118.0(2) . . ?
 C6 C7 Se1 121.8(2) . . ?
 C6 C7 C2 120.2(3) . . ?
 C5 C8 H8A 109.5 . . ?
 C5 C8 H8B 109.5 . . ?
 C5 C8 H8C 109.5 . . ?
 H8A C8 H8B 109.5 . . ?
 H8A C8 H8C 109.5 . . ?
 H8B C8 H8C 109.5 . . ?
 Se1 C9 H9A 109.5 . . ?
 Se1 C9 H9B 109.5 . . ?
 Se1 C9 H9C 109.5 . . ?
 H9A C9 H9B 109.5 . . ?
 H9A C9 H9C 109.5 . . ?
 H9B C9 H9C 109.5 . . ?
 C11 C10 N1 120.5(3) . . ?
 C11 C10 C15 119.1(3) . . ?
 C15 C10 N1 120.4(3) . . ?
 C10 C11 H11 119.4 . . ?
 C10 C11 C12 121.3(3) . . ?
 C12 C11 H11 119.4 . . ?
 C11 C12 H12 119.8 . . ?
 C13 C12 C11 120.4(3) . . ?
 C13 C12 H12 119.8 . . ?
 C12 C13 C14 118.2(3) . . ?
 C12 C13 C16 121.0(3) . . ?
 C14 C13 C16 120.8(3) . . ?
 C13 C14 H14 119.1 . . ?
 C15 C14 C13 121.9(3) . . ?
 C15 C14 H14 119.1 . . ?
 C10 C15 Se2 117.8(2) . . ?
 C14 C15 Se2 123.0(3) . . ?
 C14 C15 C10 119.2(3) . . ?
 C13 C16 H16A 109.5 . . ?
 C13 C16 H16B 109.5 . . ?
 C13 C16 H16C 109.5 . . ?
 H16A C16 H16B 109.5 . . ?
 H16A C16 H16C 109.5 . . ?
 H16B C16 H16C 109.5 . . ?
 Se2 C17 H17A 109.5 . . ?
 Se2 C17 H17B 109.5 . . ?
 Se2 C17 H17C 109.5 . . ?
 H17A C17 H17B 109.5 . . ?
 H17A C17 H17C 109.5 . . ?
 H17B C17 H17C 109.5 . . ?

loop_
  _geom_torsion_atom_site_label_1
  _geom_torsion_atom_site_label_2
  _geom_torsion_atom_site_label_3
  _geom_torsion_atom_site_label_4
  _geom_torsion
  _geom_torsion_site_symmetry_1
  _geom_torsion_site_symmetry_2
  _geom_torsion_site_symmetry_3
  _geom_torsion_site_symmetry_4
  _geom_torsion_publ_flag
 N1 C2 C3 C4 178.7(3) . . . . ?
 N1 C2 C7 Se1 -2.0(4) . . . . ?
 N1 C2 C7 C6 179.2(3) . . . . ?
 N1 C10 C11 C12 178.4(3) . . . . ?
 N1 C10 C15 Se2 -0.7(4) . . . . ?
 N1 C10 C15 C14 -178.9(3) . . . . ?
 C1 N1 C2 C3 -15.0(5) . . . . ?
 C1 N1 C2 C7 162.1(3) . . . . ?
 C1 N1 C10 C11 100.6(4) . . . . ?
 C1 N1 C10 C15 -79.6(4) . . . . ?
 C2 N1 C10 C11 -36.8(4) . . . . ?
 C2 N1 C10 C15 143.1(3) . . . . ?
 C2 C3 C4 C5 1.5(6) . . . . ?
 C3 C2 C7 Se1 175.2(3) . . . . ?
 C3 C2 C7 C6 -3.5(5) . . . . ?
 C3 C4 C5 C6 -2.4(6) . . . . ?
 C3 C4 C5 C8 178.2(4) . . . . ?
 C4 C5 C6 C7 0.3(5) . . . . ?
 C5 C6 C7 Se1 -176.0(3) . . . . ?
 C5 C6 C7 C2 2.7(5) . . . . ?
 C7 C2 C3 C4 1.5(5) . . . . ?
 C8 C5 C6 C7 179.7(3) . . . . ?
 C10 N1 C2 C3 121.0(3) . . . . ?
 C10 N1 C2 C7 -61.9(4) . . . . ?
 C10 C11 C12 C13 0.9(6) . . . . ?
 C11 C10 C15 Se2 179.1(2) . . . . ?
 C11 C10 C15 C14 0.9(5) . . . . ?
 C11 C12 C13 C14 0.1(6) . . . . ?
 C11 C12 C13 C16 -179.6(4) . . . . ?
 C12 C13 C14 C15 -0.6(5) . . . . ?
 C13 C14 C15 Se2 -178.0(3) . . . . ?
 C13 C14 C15 C10 0.1(5) . . . . ?
 C15 C10 C11 C12 -1.5(5) . . . . ?
 C16 C13 C14 C15 179.1(3) . . . . ?

_shelx_res_file
;
    js001a.res created by SHELXL-2014/7

TITL js001a_a.res in P2(1)/c
REM Old TITL js001a in P21/c #14
REM SHELXT solution in P2(1)/c
REM R1 0.173, Rweak 0.019, Alpha 0.030, Orientation as input
REM Formula found by SHELXT: C17 N Se2
CELL 0.71073 14.5262 8.1591 14.4769 90 100.438 90
ZERR 4 0.001 0.0006 0.001 0 0.004 0
LATT 1
SYMM -X,0.5+Y,0.5-Z
SFAC C H N Se
UNIT 68 84 4 8

L.S. 12
PLAN  20
TEMP 21.49
BOND $H
LIST 6
fmap 2
MORE -1
ACTA 52
CONF
SHEL 8 0.8
REM <olex2.extras>
REM <HklSrc "%.\\js001a.hkl">
REM </olex2.extras>

WGHT    0.032700    1.342600
FVAR       0.40993
SE1   4    0.856651    0.789950    0.257530    11.00000    0.06928    0.06878 =
         0.04389   -0.01591    0.02486   -0.01380
SE2   4    0.742358    0.363739    0.286599    11.00000    0.06786    0.05292 =
         0.06382    0.00736    0.00114    0.01359
N1    3    0.742940    0.674684    0.402575    11.00000    0.04973    0.05987 =
         0.03550    0.00677    0.01000   -0.00310
C1    1    0.711499    0.579710    0.477708    11.00000    0.08879    0.09221 =
         0.05027    0.01476    0.01967   -0.01955
AFIX 137
H1A   2    0.762486    0.567707    0.529640    11.00000   -1.50000
H1B   2    0.690737    0.473403    0.454238    11.00000   -1.50000
H1C   2    0.660795    0.636157    0.498185    11.00000   -1.50000
AFIX   0
C2    1    0.789708    0.823946    0.430201    11.00000    0.04498    0.05817 =
         0.03086   -0.00190    0.00429    0.00689
C3    1    0.787428    0.898136    0.515763    11.00000    0.06444    0.08609 =
         0.03956   -0.00555    0.01686    0.00659
AFIX  43
H3    2    0.752970    0.850092    0.556800    11.00000   -1.20000
AFIX   0
C4    1    0.835480    1.042579    0.541468    11.00000    0.07183    0.08150 =
         0.03891   -0.02123    0.00272    0.01060
AFIX  43
H4    2    0.833789    1.088118    0.600027    11.00000   -1.20000
AFIX   0
C5    1    0.885348    1.119606    0.482541    11.00000    0.05864    0.05804 =
         0.05032   -0.01258   -0.00952    0.01390
C6    1    0.888995    1.044720    0.397764    11.00000    0.05273    0.05831 =
         0.04230   -0.00266    0.00401    0.00091
AFIX  43
H6    2    0.922799    1.094783    0.356814    11.00000   -1.20000
AFIX   0
C7    1    0.844505    0.898979    0.371735    11.00000    0.04304    0.05124 =
         0.02954   -0.00341    0.00210    0.00646
C8    1    0.936047    1.280527    0.508674    11.00000    0.09943    0.06546 =
         0.07575   -0.02684   -0.01509    0.00141
AFIX 137
H8A   2    1.000428    1.269685    0.502382    11.00000   -1.50000
H8B   2    0.932656    1.307871    0.572467    11.00000   -1.50000
H8C   2    0.907090    1.365703    0.467683    11.00000   -1.50000
AFIX   0
C9    1    0.955395    0.915047    0.220946    11.00000    0.09985    0.10648 =
         0.07824   -0.01042    0.05434   -0.02376
AFIX 137
H9A   2    0.967463    0.875238    0.161885    11.00000   -1.50000
H9B   2    1.010984    0.904465    0.267830    11.00000   -1.50000
H9C   2    0.937321    1.028254    0.214753    11.00000   -1.50000
AFIX   0
C10   1    0.674278    0.681287    0.317441    11.00000    0.03471    0.05137 =
         0.04427    0.00346    0.01112    0.00160
C11   1    0.619194    0.817248    0.296266    11.00000    0.04549    0.05904 =
         0.05753   -0.01549    0.01370    0.00545
AFIX  43
H11   2    0.625443    0.904580    0.338221    11.00000   -1.20000
AFIX   0
C12   1    0.553955    0.827227    0.213044    11.00000    0.04439    0.05987 =
         0.06769   -0.00191    0.00361    0.01425
AFIX  43
H12   2    0.517919    0.921375    0.199654    11.00000   -1.20000
AFIX   0
C13   1    0.542634    0.699174    0.150900    11.00000    0.04546    0.06163 =
         0.05310    0.00032    0.00296    0.00563
C14   1    0.597583    0.560330    0.173308    11.00000    0.05277    0.04700 =
         0.04996   -0.00210    0.00394    0.00038
AFIX  43
H14   2    0.590137    0.472088    0.131961    11.00000   -1.20000
AFIX   0
C15   1    0.663113    0.549675    0.255472    11.00000    0.04278    0.04282 =
         0.04617    0.00423    0.00946    0.00026
C16   1    0.472487    0.708564    0.059904    11.00000    0.07238    0.08364 =
         0.07174   -0.00192   -0.02018    0.01871
AFIX 137
H16A  2    0.504680    0.699706    0.007764    11.00000   -1.50000
H16B  2    0.440008    0.811455    0.056726    11.00000   -1.50000
H16C  2    0.428303    0.620484    0.057536    11.00000   -1.50000
AFIX   0
C17   1    0.684958    0.212206    0.191050    11.00000    0.08950    0.04882 =
         0.09872   -0.00798    0.00414    0.00316
AFIX 137
H17A  2    0.690425    0.253912    0.130272    11.00000   -1.50000
H17B  2    0.620004    0.199294    0.194603    11.00000   -1.50000
H17C  2    0.715872    0.107982    0.200712    11.00000   -1.50000
AFIX   0
HKLF 4

REM  js001a_a.res in P2(1)/c
REM R1 =  0.0335 for    2567 Fo > 4sig(Fo)  and  0.0570 for all    3455 data
REM    186 parameters refined using      0 restraints

END

WGHT      0.0327      1.3426

REM Highest difference peak  0.525,  deepest hole -0.555,  1-sigma level  0.064
Q1    1   0.7219  0.3846  0.3378  11.00000  0.05    0.53
Q2    1   0.4682  0.8028  0.0121  11.00000  0.05    0.29
Q3    1   1.0319  0.8572  0.2809  11.00000  0.05    0.26
Q4    1   0.8802  0.7056  0.2976  11.00000  0.05    0.26
Q5    1   0.8034  0.8136  0.2617  11.00000  0.05    0.25
Q6    1   0.8852  0.7652  0.3163  11.00000  0.05    0.25
Q7    1   0.8176  0.8772  0.3289  11.00000  0.05    0.22
Q8    1   0.5814  0.6593  0.1427  11.00000  0.05    0.22
Q9    1   0.8558  0.8056  0.3843  11.00000  0.05    0.22
Q10   1   0.9182  1.0044  0.1967  11.00000  0.05    0.22
Q11   1   0.8863  1.3598  0.5430  11.00000  0.05    0.22
Q12   1   0.6362  0.9397  0.3215  11.00000  0.05    0.22
Q13   1   0.4699  0.5860  0.0189  11.00000  0.05    0.21
Q14   1   0.8831  0.8042  0.2154  11.00000  0.05    0.21
Q15   1   0.7906  0.7968  0.1799  11.00000  0.05    0.21
Q16   1   0.3974  0.7218  0.0659  11.00000  0.05    0.20
Q17   1   0.8015  0.3614  0.3622  11.00000  0.05    0.20
Q18   1   0.3792  0.7377  0.0815  11.00000  0.05    0.19
Q19   1   0.9822  1.2535  0.5954  11.00000  0.05    0.19
Q20   1   1.0001  0.9861  0.3811  11.00000  0.05    0.19
;
_shelx_res_checksum               54045
_shelx_hkl_file
;
   0   0  -2 6660.53  161.68
   0   0   3    4.80    1.20
   0   0  -3    0.80    3.50
   0   0   3    8.40    1.30
   0   0  -3    3.20    1.10
   0   0  -4 8133.29  199.98
   0   0  -5   -1.70    6.70
   0   0  -5    0.20    1.40
   0   0   5    5.40    1.60
   0   0  -5   -0.40    1.60
   0   0   5    1.10    1.90
   0   0  -6 1056.89   25.90
   0   0   6 1067.79   25.80
   0   0  -6 1022.20   34.70
   0   0  -6 1045.20   25.60
   0   0  -7    4.70    2.00
   0   0  -7    2.50    2.40
   0   0   7    5.20    2.40
   0   0  -7    8.60    9.30
   0   0   8  409.16   11.10
   0   0  -8  406.56   11.40
   0   0  -8  370.66   23.30
   0   0  -8  411.86   10.80
   0   0  -9  -13.90   13.70
   0   0   9    2.30    3.10
   0   0  -9   -0.90    3.00
   0   0  -9    2.90    2.60
   0   0 -10    2.80    3.60
   0   0  10    1.80    3.60
   0   0 -10   29.10   20.10
   0   0 -10    9.10    3.00
   0   0 -11    3.90    3.30
   0   0  11   -4.10    4.00
   0   0 -11   -3.90    3.70
   0   0 -12   25.00   33.70
   0   0  12    3.00    4.80
   0   0 -12    7.70    4.40
   0   0 -12   14.50    3.90
   0   0 -13   19.20   25.90
   0   0 -13    5.60    4.00
   0   0 -13   -0.50    4.70
   0   0  13   -2.40    5.20
   0   0 -14   11.00    4.20
   0   0  14  -13.40   25.60
   0   0 -14  -55.29   26.70
   0   0  14    1.20    6.00
   0   0 -14    9.00    5.10
   0   0 -15   -3.00    5.60
   0   0  15    2.70    6.20
   0   0 -15    1.80    5.40
   0   0  15   39.90   26.80
   0   0 -15    1.80   33.60
   0   0 -16   13.20    6.00
   0   0 -16    9.70    5.20
   0   0  16    4.80    6.60
   0   0 -17   -2.00    5.50
   0   0 -17   12.10    6.30
   0   0  17    6.80    7.10
   0   0  18    7.50    8.00
   0   0 -18    1.20    5.90
   0   0 -19   -0.50    6.30
   0   0  19    7.00    8.80
   0   1  -1  306.17    8.50
   0  -1   1  341.67   13.00
   0  -1  -1  360.66    8.30
   0  -1  -1  348.57   13.10
   0   1  -2    5.50    1.40
   0   1  -2    7.10    4.60
   0  -1  -2    4.80    1.10
   0  -1   2    4.70    1.00
   0  -1   2    6.60    4.50
   0  -1  -2    3.80    3.90
   0  -1   2    4.30    1.30
   0   1  -3  406.16   15.90
   0   1  -3  424.06   10.60
   0  -1  -3  433.96   10.30
   0  -1   3  412.26   10.20
   0  -1   3  340.47   15.00
   0  -1  -3  393.36   15.40
   0   1  -4  181.18    5.80
   0   1  -4  177.88   11.60
   0   1   4  184.08    4.80
   0  -1  -4  180.98    4.70
   0  -1  -4  168.58   12.00
   0  -1   4  189.38    5.40
   0  -1  -4  189.68    5.00
   0  -1  -4  188.68    5.50
   0   1   5 1088.49   26.30
   0   1   5 1114.09   26.40
   0   1  -5 1111.19   26.20
   0   1  -5 1091.59   27.00
   0   1  -5 1071.29   34.90
   0  -1  -5 1102.69   26.70
   0  -1   5 1091.39   26.70
   0  -1  -5 1146.99   26.40
   0  -1  -5 1065.69   26.20
   0  -1  -5  985.10   37.80
   0   1   6  272.47    7.20
   0   1   6  259.37    7.20
   0   1  -6  290.17    6.90
   0   1  -6  273.77   17.90
   0   1  -6  261.97    8.10
   0  -1  -6  265.67   24.30
   0  -1  -6  257.87    7.50
   0  -1   6  207.68   14.40
   0  -1  -6  270.27    7.00
   0  -1   6  256.67    7.60
   0  -1  -6  265.87    7.10
   0   1  -7  730.73   18.20
   0   1  -7  712.43   29.60
   0   1   7  766.32   18.50
   0   1   7  728.83   18.50
   0  -1  -7  729.53   18.70
   0  -1  -7  747.93   18.20
   0  -1  -7  748.23   18.30
   0  -1   7  752.32   18.90
   0   1  -8   -3.80    3.20
   0   1   8    3.80    2.40
   0   1  -8    5.30    1.90
   0   1  -8   -3.70   12.20
   0  -1   8    2.70    3.10
   0  -1  -8   -0.50    2.60
   0  -1   8   20.20   12.20
   0  -1  -8   -0.60    1.60
   0  -1  -8    1.10    2.20
   0   1  -9  220.68   21.10
   0   1  -9  213.48    6.40
   0   1  -9  222.88    8.30
   0   1   9  221.68    7.20
   0  -1  -9  217.48    7.60
   0  -1   9  227.08    8.00
   0  -1  -9  219.68    6.10
   0  -1   9  158.48   25.30
   0  -1  -9  226.88    7.00
   0  -1  -9  185.38   30.60
   0   1 -10   26.80   17.10
   0   1  10   23.40    3.50
   0   1 -10   25.60    2.70
   0   1 -10   14.60    4.30
   0  -1 -10   19.80    3.10
   0  -1 -10   16.60    3.80
   0  -1 -10   16.50    1.80
   0  -1  10   16.40    4.00
   0  -1 -10    6.60   14.00
   0   1  11   11.90   26.30
   0   1 -11   14.80    4.50
   0   1 -11   20.00    3.00
   0   1 -11    9.50   19.50
   0   1  11   12.80    4.00
   0  -1 -11   21.50    4.20
   0  -1  11   23.20    4.70
   0  -1 -11   19.20    3.40
   0  -1 -11   19.10    1.80
   0  -1 -11    3.50   17.20
   0   1 -12  -13.00   21.30
   0   1 -12   -1.40    4.90
   0   1  12  -23.80   17.40
   0   1 -12    1.70    3.10
   0   1  12   -0.90    4.20
   0  -1 -12   -1.40    4.50
   0  -1 -12   -3.10    4.40
   0  -1 -12    4.20   19.70
   0  -1  12    1.40    5.20
   0   1  13    5.10    4.60
   0   1 -13   -3.00   25.00
   0   1 -13   -1.50    5.20
   0   1  13   10.60   19.90
   0   1 -13    6.10    3.30
   0  -1 -13    6.80    4.80
   0  -1 -13    3.10    4.00
   0  -1  13    3.20    5.70
   0  -1 -13  -26.10   23.10
   0   1  14   42.10   23.30
   0   1 -14   16.50   35.50
   0   1  14   35.20    5.70
   0   1 -14   29.50    4.00
   0   1 -14   30.80    6.20
   0  -1 -14   32.00    4.50
   0  -1 -14   35.20    5.90
   0  -1 -14   38.50   28.00
   0  -1  14   32.10    6.50
   0   1 -15    7.90    4.00
   0   1  15  -24.50   27.50
   0   1 -15   -4.00    6.40
   0   1  15    6.60    8.90
   0  -1 -15   10.90    7.90
   0  -1 -15   11.10   37.70
   0  -1  15   -0.70    6.40
   0  -1 -15    6.20    4.40
   0   1 -16   51.49    5.10
   0   1  16   61.49    6.90
   0   1 -16   69.19    7.70
   0  -1 -16   77.09    8.60
   0  -1  16   61.39    8.10
   0  -1 -16   60.79    8.00
   0   1  17   19.10    7.00
   0   1 -17   22.70    7.60
   0  -1 -17   16.40    6.50
   0  -1  17   -0.40    7.90
   0   1  18   54.29    7.90
   0   1 -18   41.60    6.40
   0  -1 -18   52.29    7.10
   0  -1  18   51.79    9.30
   0   1  19    6.50    7.20
   0  -1 -19    5.20    7.40
   0  -1  19    4.00    9.30
   0   2   0 3375.06   85.09
   0   2   0 3760.02   94.49
   0  -2   0 3523.05   84.79
   0  -2   0 3456.05   85.09
   0  -2   0 3651.53   94.19
   0   2   1 3689.43   91.29
   0   2  -1 3882.01  100.29
   0   2   1 3952.00  101.09
   0   2  -1 3730.73   91.59
   0  -2  -1 4029.20  101.39
   0  -2   1 3793.82   91.29
   0  -2   1 3708.43   91.19
   0  -2  -1 3778.32   91.29
   0  -2  -1 3663.53   91.29
   0  -2  -1 3753.52   91.39
   0  -2   1 4054.19  100.79
   0   2  -2 1839.12   44.90
   0   2   2 1692.43   53.19
   0   2   2 1821.52   44.20
   0  -2   2 1867.11   44.40
   0  -2  -2 1874.91   44.50
   0  -2  -2 1807.42   44.20
   0  -2  -2 1871.91   44.50
   0  -2   2 1865.01   53.79
   0  -2   2 1840.12   53.09
   0  -2  -2 1898.81   53.89
   0  -2   2 1908.81   44.40
   0   2  -3 3873.91   95.79
   0  -2  -3 3885.81   95.39
   0  -2   3 3970.30   95.09
   0  -2  -3 3921.41   95.29
   0  -2  -3 4300.27  105.49
   0  -2   3 3852.91   95.29
   0  -2   3 4083.99  105.09
   0   2  -4 1099.39   27.60
   0   2  -4 1132.99   37.70
   0  -2   4 1092.19   27.10
   0  -2  -4 1114.99   26.90
   0  -2  -4 1077.59   27.10
   0  -2   4 1132.89   26.70
   0  -2   4 1099.99   37.30
   0  -2  -4 1065.89   36.10
   0   2  -5  922.11   26.50
   0   2  -5 1054.99   37.20
   0  -2  -5 1058.29   25.50
   0  -2   5 1046.70   36.80
   0  -2  -5 1052.69   25.20
   0  -2  -5 1038.20   35.70
   0   2  -6  644.24   15.20
   0   2  -6  647.44   29.20
   0   2   6  603.94   15.50
   0   2  -6  617.64   16.80
   0  -2   6  620.04   28.00
   0  -2  -6  590.64   28.10
   0  -2   6  606.04   16.10
   0  -2  -6  646.34   15.80
   0  -2  -6  625.64   16.30
   0   2   7  397.66    9.90
   0   2  -7  384.26   11.70
   0   2  -7  388.46    9.50
   0   2  -7  384.96   24.90
   0  -2   7  367.06   10.80
   0  -2  -7  376.66   10.30
   0  -2  -7  382.06   11.10
   0  -2   7  348.57   23.50
   0   2   8  143.69    5.10
   0   2  -8  152.58    4.40
   0   2  -8  140.69    7.40
   0   2  -8  136.09   18.80
   0  -2  -8  163.28   30.80
   0  -2  -8  147.29    5.50
   0  -2   8  160.78   18.10
   0  -2   8  141.79    6.30
   0  -2  -8  151.88    6.90
   0   2  -9   -4.40    4.20
   0   2  -9    4.60    1.80
   0   2  -9    8.20   15.30
   0   2   9   -1.60    2.50
   0  -2  -9    5.60    2.50
   0  -2  -9   -0.20    3.50
   0  -2   9   -0.30    4.10
   0  -2  -9   19.60   15.30
   0  -2   9   -4.30   13.50
   0   2  10  101.99    5.20
   0   2 -10   99.69    8.50
   0   2 -10   98.99    4.20
   0   2 -10  143.69   22.80
   0  -2 -10  122.59   20.60
   0  -2 -10  109.19    5.00
   0  -2  10   94.49    7.30
   0  -2  10   89.39   17.00
   0  -2 -10  109.89    7.00
   0   2 -11    7.30   17.90
   0   2 -11    8.00    2.40
   0   2  11    6.90    3.30
   0   2 -11    1.60    5.30
   0   2  11   21.00   17.50
   0  -2 -11    5.70    1.90
   0  -2  11   16.90   18.10
   0  -2  11    0.70    5.30
   0  -2 -11   21.90   18.60
   0  -2 -11   13.80    2.70
   0  -2 -11    5.50    4.90
   0   2 -12  127.29   26.90
   0   2  12  106.99    6.50
   0   2 -12  120.09    9.60
   0   2  12   95.19   21.40
   0   2 -12  119.89    5.10
   0  -2  12  122.39    9.00
   0  -2  12  150.18   25.40
   0  -2 -12  122.29    8.50
   0  -2 -12  116.19   25.20
   0  -2 -12  113.19    4.40
   0  -2 -12  111.19    5.20
   0   2  13  182.18    8.10
   0   2 -13  185.88    6.50
   0   2  13  176.58   28.50
   0   2 -13  181.78   33.10
   0   2 -13  188.88   11.10
   0  -2 -13  187.58    6.40
   0  -2 -13  210.78    9.80
   0  -2 -13  282.97   39.20
   0  -2  13  190.18   10.70
   0  -2 -13  179.98    6.00
   0  -2  13  161.58   27.10
   0   2 -14    7.30   31.10
   0   2  14   -8.70   22.90
   0   2 -14    3.80    3.20
   0   2 -14    9.40    6.60
   0   2  14    8.40    4.70
   0  -2 -14    6.40   26.20
   0  -2  14   13.20    6.70
   0  -2 -14    5.80    5.80
   0  -2 -14    1.20    2.50
   0  -2 -14    4.70    2.50
   0  -2  14   -5.10   25.40
   0   2  15   -0.80    5.00
   0   2 -15   -0.80    7.00
   0   2 -15   -4.30    3.50
   0  -2  15   -1.00    6.80
   0  -2 -15    0.20    6.60
   0   2 -16   11.00    4.00
   0   2  16   28.70    5.70
   0   2 -16   30.10    8.20
   0  -2  16   32.90    8.20
   0  -2 -16   20.60    7.20
   0   2  17   12.70    6.00
   0   2 -17    6.60    8.50
   0  -2 -17   -0.80    7.20
   0  -2  17   -5.10    8.40
   0   2  18   18.10   10.10
   0  -2 -18   12.60    7.80
   0  -2  18    4.10    9.30
   0  -2  19   13.50   10.20
   0  -2 -19   -6.00    8.20
   0   3   0   -2.50    2.20
   0   3   0   -7.20   10.00
   0  -3   0    1.80    1.60
   0  -3   0   -2.00    1.70
   0  -3   0   -0.70    1.30
   0  -3   0   -3.10    9.40
   0   3   1   63.19   12.60
   0   3  -1   82.19   13.30
   0   3  -1   78.39    4.50
   0   3   1   79.19    3.90
   0  -3  -1   79.59   13.30
   0  -3   1   76.59    3.70
   0  -3  -1   82.59    2.70
   0  -3  -1   80.09    3.90
   0  -3   1   82.49    3.00
   0  -3   1   86.59   13.50
   0  -3   1   81.19    3.30
   0  -3  -1   79.09    3.30
   0   3  -2  331.27    9.90
   0   3  -2  364.56   20.70
   0   3   2  329.57    9.00
   0   3   2  341.27   22.40
   0  -3  -2  323.77    9.00
   0  -3   2  337.47   20.90
   0  -3  -2  343.67   22.80
   0  -3  -2  326.57    8.90
   0  -3   2  330.17    9.00
   0  -3  -2  338.87    9.30
   0  -3   2  328.87    8.90
   0   3  -3  689.73   16.70
   0   3  -3  692.83   18.10
   0   3   3  676.63   16.90
   0   3   3  683.63   30.50
   0  -3  -3  687.23   17.40
   0  -3  -3  687.53   17.40
   0  -3   3  690.03   17.30
   0  -3   3  654.83   29.10
   0  -3   3  707.93   31.20
   0  -3   3  690.03   17.10
   0  -3  -3  658.53   29.90
   0  -3  -3  672.33   16.90
   0   3   4  820.42   35.10
   0   3   4  873.01   20.80
   0   3  -4  895.01   20.90
   0  -3   4  826.22   34.70
   0  -3   4  846.02   21.50
   0  -3  -4  869.41   20.80
   0  -3   4  891.51   21.30
   0  -3  -4  841.32   34.50
   0  -3   4  841.12   34.40
   0  -3  -4  864.21   21.60
   0  -3  -4  852.51   21.60
   0   3  -5  489.35   14.10
   0  -3  -5  506.65   25.70
   0  -3   5  472.25   27.00
   0  -3   5  499.35   12.50
   0  -3  -5  484.75   13.00
   0  -3   5  473.45   13.00
   0  -3   5  487.45   26.80
   0  -3  -5  479.35   13.10
   0   3  -6  857.71   22.80
   0  -3  -6  838.32   21.90
   0  -3  -6  852.51   21.60
   0  -3   6  852.71   21.90
   0  -3   6  858.31   21.10
   0  -3  -6  877.31   36.90
   0  -3   6  847.82   37.10
   0   3  -7  345.47    8.50
   0   3  -7  339.27   11.60
   0   3  -7  346.47   25.30
   0  -3   7  310.17    9.10
   0  -3  -7  346.57    9.90
   0  -3   7  334.17   10.30
   0  -3  -7  334.77   25.60
   0  -3   7  346.97   26.20
   0  -3  -7  357.16   10.80
   0   3  -8  471.45   14.50
   0   3  -8  469.85   11.50
   0   3  -8  479.25   30.30
   0  -3  -8  443.76   35.40
   0  -3  -8  452.85   13.40
   0  -3   8  447.96   30.00
   0  -3   8  453.55   11.80
   0  -3   8  453.45   13.30
   0  -3  -8  483.05   12.80
   0   3  -9  180.28    9.60
   0   3  -9  177.98    5.10
   0   3  -9  168.78   24.10
   0   3   9  173.08    5.40
   0  -3  -9  174.08    7.20
   0  -3  -9  160.18    7.80
   0  -3   9  178.18    7.90
   0  -3   9  183.38   22.70
   0   3 -10  106.69    9.10
   0   3 -10   76.79   21.00
   0   3  10  103.09    4.50
   0   3 -10  103.59    3.80
   0  -3 -10   99.09   22.40
   0  -3 -10  110.79    8.10
   0  -3  10  113.59   19.70
   0  -3 -10  120.49    6.20
   0   3  11  -15.10   20.00
   0   3 -11    6.00    2.10
   0   3  11   11.80    2.80
   0   3 -11    2.10    5.90
   0   3 -11    4.40   23.00
   0  -3 -11    7.00    3.50
   0  -3  11    5.40    6.10
   0  -3 -11    8.70    5.00
   0  -3 -11  -15.00   20.80
   0  -3  11   27.30   19.30
   0   3  12  -14.50   21.10
   0   3 -12    5.20   26.50
   0   3 -12    3.90    6.20
   0   3  12   17.40    3.20
   0   3 -12    8.30    2.50
   0  -3  12    5.80    6.30
   0  -3 -12   14.60    3.70
   0  -3  12   36.70   22.80
   0  -3 -12   15.60    6.10
   0  -3 -12   -6.00   23.80
   0   3 -13   24.30    2.80
   0   3  13   22.10    3.60
   0   3 -13   41.70   31.90
   0   3 -13   21.40    6.90
   0   3  13  -32.60   22.20
   0  -3  13   24.10    7.10
   0  -3 -13   11.20   27.40
   0  -3 -13   21.60    3.80
   0  -3  13   12.80   24.10
   0  -3 -13   30.20    6.00
   0   3 -14   51.39    4.40
   0   3 -14   36.40   35.30
   0   3  14   63.29    5.80
   0   3  14   52.69   25.50
   0   3 -14   79.69    8.40
   0  -3 -14   85.39   32.40
   0  -3 -14   61.79    6.20
   0  -3 -14   61.49    7.60
   0  -3  14   77.29   26.70
   0  -3  14   63.19    8.00
   0   3 -15   -4.30    8.00
   0   3  15    7.00    4.10
   0  -3  15   -4.80    8.00
   0  -3 -15   -3.80    3.60
   0  -3 -15    6.80    6.40
   0  -3  16   12.00    8.30
   0  -3 -16    0.80    7.90
   0  -3 -17   11.70    8.20
   0  -3  17   17.60    9.40
   0  -3  18   29.10   10.40
   0  -3 -18    0.50    8.90
   0  -3 -19    8.70    9.50
   0  -3  19   25.70   11.20
   0   4   0  526.85   29.60
   0  -4   0  536.25   13.70
   0  -4   0  529.55   29.60
   0  -4   0  532.65   13.40
   0  -4   0  521.85   14.20
   0   4  -1 1081.69   27.80
   0   4   1 1144.69   45.80
   0   4   1 1090.19   27.40
   0   4  -1 1090.19   43.30
   0  -4   1 1100.19   26.80
   0  -4  -1 1095.39   27.30
   0  -4  -1 1097.89   27.00
   0  -4   1 1082.49   43.50
   0  -4   1 1098.89   27.30
   0  -4  -1 1063.39   44.30
   0  -4  -1 1105.49   26.50
   0  -4   1 1064.99   26.80
   0   4  -2   74.89   15.90
   0   4   2   63.29    4.60
   0   4   2   83.09   18.00
   0   4  -2   56.09    5.90
   0  -4  -2   65.19    4.90
   0  -4   2   71.99    3.50
   0  -4  -2   65.49    2.90
   0  -4   2   70.09    4.30
   0  -4  -2   71.59    4.10
   0  -4   2   69.49    4.60
   0  -4  -2   84.79   18.10
   0  -4   2   78.19   16.00
   0   4  -3 1533.25   37.70
   0   4   3 1544.95   55.99
   0   4   3 1477.05   36.50
   0  -4   3 1474.95   54.29
   0  -4   3 1469.05   53.19
   0  -4  -3 1488.35   36.80
   0  -4  -3 1454.15   54.29
   0  -4   3 1509.55   36.70
   0  -4  -3 1454.55   36.80
   0  -4   3 1515.25   36.70
   0  -4   3 1529.35   36.20
   0   4  -4   19.30    4.30
   0   4   4   23.00    2.40
   0   4   4   17.20   14.00
   0  -4   4   24.70   15.90
   0  -4   4   16.30    2.80
   0  -4   4   10.50   13.60
   0  -4  -4   24.90   16.40
   0  -4  -4   20.50    2.30
   0  -4  -4   20.80    3.60
   0  -4  -4   19.40    3.40
   0  -4   4   25.90    3.40
   0   4  -5  961.40   25.90
   0   4   5  993.70   23.90
   0   4   5  998.60   44.50
   0  -4  -5  965.50   44.10
   0  -4   5 1007.20   45.10
   0  -4  -5  980.20   24.90
   0  -4   5  986.60   25.00
   0  -4   5  990.40   43.70
   0  -4   5  997.90   24.60
   0  -4  -5  961.10   25.00
   0   4  -6  109.09    7.40
   0   4  -6  108.49    3.70
   0   4   6  144.19   21.80
   0  -4   6  106.79   19.00
   0  -4   6   87.89   21.60
   0  -4  -6  152.08   21.90
   0  -4  -6   89.39    6.70
   0  -4   6  101.49    6.50
   0  -4   6  104.09    5.10
   0  -4  -6  100.09    6.20
   0   4   7  327.37   30.90
   0   4  -7  451.75   10.60
   0   4  -7  421.86   14.20
   0  -4   7  414.76   12.50
   0  -4  -7  411.66   12.60
   0  -4  -7  383.66   31.10
   0  -4  -7  424.16   12.40
   0  -4   7  439.16   33.30
   0  -4   7  456.25   30.10
   0  -4   7  422.16   11.50
   0   4  -8   94.99    9.10
   0   4  -8   93.79    3.70
   0  -4   8   96.99    5.00
   0  -4   8   99.89    7.70
   0  -4  -8   80.49    6.40
   0  -4   8  129.99   22.90
   0  -4  -8   95.69    7.80
   0  -4  -8  103.39   20.30
   0   4  -9  145.59   10.40
   0   4  -9  163.28    5.10
   0  -4   9  159.68    5.70
   0  -4  -9  161.18   27.30
   0  -4  -9  130.39   13.10
   0  -4  -9  159.88    7.90
   0  -4   9  142.39    9.10
   0  -4   9  173.18   25.40
   0   4 -10  292.37    7.90
   0   4 -10  296.97   13.20
   0  -4  10  308.47   11.30
   0  -4 -10  297.17   10.60
   0  -4 -10  292.17   12.00
   0  -4  10  310.97   30.90
   0  -4  10  269.57    8.10
   0   4 -11   79.39    8.10
   0   4 -11   68.99    3.60
   0  -4 -11   60.39    6.50
   0  -4  11   66.39   22.60
   0  -4 -11   81.39    6.70
   0  -4  11   64.49    7.10
   0  -4 -11   87.79   28.20
   0   4 -12  183.38   12.50
   0   4  12  243.48   33.80
   0   4 -12  169.98    5.90
   0  -4 -12  199.48   33.70
   0  -4  12  236.38   32.00
   0  -4 -12  188.48    9.00
   0  -4  12  187.38   11.70
   0  -4 -12  191.98   11.30
   0   4 -13   52.69    8.60
   0   4  13   42.50   27.10
   0  -4  13   67.99   26.30
   0  -4 -13   71.59    7.40
   0  -4 -13   19.60   31.70
   0  -4  13   53.49    8.40
   0  -4 -13   54.19    7.70
   0  -4  14   92.49   10.30
   0  -4 -14  102.29   10.00
   0  -4 -14   85.69    8.10
   0  -4 -15   -1.20    4.90
   0  -4 -15    9.70    8.10
   0  -4  15    2.90    8.90
   0  -4  16   19.40    9.40
   0  -4 -16   22.40    7.90
   0  -4 -17   18.10    9.50
   0  -4  17   17.30   10.50
   0  -4  18    9.50   10.60
   0  -4 -18   -7.80    8.50
   0   5   0  -32.70   16.50
   0   5   0   -3.60    3.80
   0  -5   0   -2.30    3.20
   0  -5   0   -6.10    2.80
   0  -5   0   -1.30    2.30
   0  -5   0   -9.20   17.60
   0   5   1   -6.70   16.90
   0   5  -1   -8.50    4.20
   0   5  -1  -15.60   14.90
   0   5   1   -6.70    3.80
   0  -5  -1  -18.00   15.60
   0  -5   1  -12.30   15.20
   0  -5  -1    1.80    2.10
   0  -5   1   -4.60    2.70
   0  -5  -1    0.90    3.30
   0  -5  -1   -5.80    3.30
   0  -5   1   -4.00    3.10
   0  -5   1   -1.80    2.60
   0   5  -2   25.10    4.90
   0   5  -2   24.30   16.10
   0   5   2   28.50    4.70
   0   5   2   25.80   19.40
   0  -5  -2   22.00   17.30
   0  -5   2   29.90   17.70
   0  -5   2   25.90    3.20
   0  -5  -2   27.00    3.10
   0  -5   2   30.80    3.00
   0  -5  -2   19.20    3.70
   0  -5  -2   26.80    4.00
   0  -5   2   27.40    3.90
   0   5  -3   70.19    7.70
   0   5   3   70.69   20.60
   0   5   3   66.09    5.40
   0  -5   3   66.59    4.30
   0  -5   3   97.29   21.40
   0  -5   3   75.29    5.30
   0  -5   3   58.69    5.60
   0  -5  -3   62.09    3.10
   0  -5  -3   68.89    5.70
   0  -5  -3   70.09   22.80
   0  -5  -3   63.39    5.20
   0   5   4  301.37    9.30
   0   5   4  287.57   31.60
   0   5  -4  321.47   12.10
   0  -5  -4  302.07   10.10
   0  -5   4  318.87    9.90
   0  -5   4  325.87    8.70
   0  -5  -4  298.07    9.90
   0  -5   4  310.87   30.70
   0  -5   4  305.27   10.00
   0  -5  -4  293.07   33.10
   0  -5   4  317.07   28.40
   0   5   5   78.09   21.60
   0   5  -5   52.19    6.10
   0   5   5   56.09    4.40
   0  -5  -5   60.99    5.10
   0  -5  -5   48.60   22.70
   0  -5   5   49.20    4.30
   0  -5   5   61.69    3.60
   0  -5   5   58.69   23.20
   0  -5   5   56.79    5.50
   0  -5  -5   59.79    5.40
   0  -5   5   78.69   22.40
   0   5  -6  626.74   19.40
   0   5   6  630.74   16.00
   0   5   6  672.33   38.50
   0  -5   6  609.94   40.40
   0  -5  -6  618.44   41.80
   0  -5   6  653.63   18.00
   0  -5  -6  637.14   17.60
   0  -5   6  662.23   16.10
   0  -5   6  654.23   45.90
   0  -5   6  655.93   17.30
   0  -5  -6  648.34   18.20
   0   5   7  259.27   33.90
   0   5  -7  271.07   12.40
   0  -5   7  265.67   11.40
   0  -5   7  295.87   30.00
   0  -5   7  268.67    9.10
   0  -5  -7  277.67   31.10
   0  -5  -7  261.57    9.60
   0   5  -8  152.08   10.20
   0   5   8  128.89   25.50
   0  -5   8  166.78   28.10
   0  -5   8  142.29    8.40
   0  -5  -8  175.38   29.80
   0  -5   8  155.58    7.00
   0  -5  -8  148.59    8.40
   0  -5  -8  162.38    8.50
   0   5   9   38.90   29.00
   0   5  -9   24.30    7.40
   0  -5   9    9.60    6.20
   0  -5   9   19.70    3.50
   0  -5  -9   18.00    5.00
   0  -5   9  -19.60   23.30
   0  -5  -9   16.50    6.30
   0  -5  -9   -2.40   24.30
   0   5 -10  361.06   15.20
   0  -5  10  314.77   13.20
   0  -5 -10  316.37   13.10
   0  -5  10  312.57    9.60
   0  -5  10  265.77   38.80
   0  -5 -10  255.87   41.00
   0  -5 -10  301.47   13.00
   0   5 -11   86.29   12.10
   0  -5  11   71.89    4.90
   0  -5 -11   77.49    7.10
   0  -5  11  134.09   31.80
   0  -5 -11   79.69    9.00
   0  -5  11   76.29    8.00
   0   5  12   85.69   50.69
   0  -5  12   59.39    8.20
   0  -5 -12   60.49    7.40
   0  -5 -12   58.29    6.10
   0  -5  12   41.70   28.60
   0  -5 -12   39.90   34.50
   0  -5 -13    9.60    8.10
   0  -5  13   27.60    8.60
   0  -5 -13   24.80    5.60
   0  -5  14   11.50    9.40
   0  -5 -14   16.20    8.40
   0  -5 -14   13.40    5.60
   0  -5 -15   -3.50    5.70
   0  -5  15   -3.20    9.80
   0  -5 -15    7.00    8.00
   0  -5 -16    1.00    9.40
   0  -5  16   10.80   10.20
   0  -5 -16   -3.00    6.00
   0  -5  17  -14.40   11.30
   0  -5 -17    9.90    9.90
   0   6   0   52.09    6.10
   0   6   0   54.69   20.80
   0  -6   0   56.39    5.60
   0  -6   0   56.59    5.70
   0  -6   0   57.39    4.60
   0  -6   0   57.19   22.60
   0   6  -1   64.59    8.90
   0   6  -1   76.29   25.30
   0   6   1   70.49    7.80
   0   6   1   63.69   22.60
   0  -6  -1   74.49    5.50
   0  -6  -1  101.19   23.30
   0  -6   1   77.29    5.50
   0  -6   1   63.89    7.30
   0  -6  -1   68.69    5.80
   0  -6   1  132.99   27.30
   0  -6  -1   69.49    4.50
   0  -6   1   82.79    5.50
   0   6  -2   73.09   22.40
   0   6  -2   72.99    8.80
   0   6   2   71.29   23.30
   0   6   2   68.19    7.10
   0  -6   2   90.19   27.00
   0  -6  -2   61.09    6.70
   0  -6  -2  101.19   25.10
   0  -6  -2   73.19    5.90
   0  -6   2   81.19    5.60
   0  -6   2   83.49    6.40
   0  -6  -2   74.19    4.20
   0  -6   2   81.89    5.20
   0   6  -3   14.30    6.00
   0   6   3    8.30    4.40
   0   6   3    3.90   19.70
   0  -6  -3    3.30   21.60
   0  -6  -3   10.30    2.10
   0  -6   3   15.20    3.30
   0  -6  -3    4.50    4.50
   0  -6  -3    3.90    4.70
   0  -6   3   15.90    4.10
   0  -6   3   37.50   26.50
   0  -6   3    7.70    4.60
   0   6  -4   -1.10    6.20
   0   6   4  -17.10   19.60
   0  -6  -4   43.50   24.10
   0  -6   4    2.10    3.00
   0  -6   4    2.10    4.20
   0  -6  -4  -12.20    4.90
   0  -6   4    4.90    4.40
   0  -6   4    9.10   20.40
   0  -6   4   -6.40   24.30
   0   6  -5  146.29   11.20
   0   6   5  150.58    6.90
   0   6   5  163.38   29.20
   0  -6   5  171.78    8.30
   0  -6  -5  163.38   31.20
   0  -6  -5  116.99   10.20
   0  -6   5  105.99   29.60
   0  -6   5  149.59    8.00
   0  -6   5  219.18   31.20
   0  -6   5  157.58    6.00
   0  -6  -5  127.09    8.20
   0   6   6   49.90    4.70
   0   6  -6   34.00    7.30
   0   6   6   28.40   24.80
   0  -6   6   45.50   27.10
   0  -6  -6   36.90    6.20
   0  -6  -6   41.30    5.90
   0  -6   6   40.60    5.00
   0  -6  -6   -8.70   25.60
   0  -6   6   37.40    5.50
   0  -6   6   47.90    4.30
   0   6  -7  118.09   11.60
   0   6   7  122.19   26.00
   0  -6  -7  124.89   28.70
   0  -6   7  121.79   27.70
   0  -6  -7  105.39    9.00
   0  -6   7  110.19    4.80
   0  -6  -7  100.19    9.40
   0  -6   7  112.89    8.00
   0  -6   7  108.89    7.20
   0   6  -8   32.80    8.00
   0   6   8   20.20   28.00
   0  -6   8   27.70    6.20
   0  -6  -8   17.50    6.70
   0  -6   8   28.00    4.80
   0  -6   8   31.30   25.80
   0  -6  -8   20.80    5.60
   0  -6  -8   37.80   25.30
   0  -6   8   20.90    2.40
   0   6   9  284.77   41.60
   0   6  -9  261.07   14.80
   0  -6   9  259.27   12.40
   0  -6   9  290.87   42.70
   0  -6  -9  248.48   11.50
   0  -6   9  256.77    9.90
   0  -6  -9  260.17   12.70
   0  -6  -9  245.88   39.50
   0   6  10   20.70   32.40
   0  -6 -10  -20.00   32.50
   0  -6  10   -0.40   31.90
   0  -6 -10    5.70    5.90
   0  -6 -10    4.00    7.40
   0  -6  10    1.10    6.40
   0  -6  10   13.20    4.20
   0  -6  11  122.79    7.10
   0  -6 -11  131.39   11.90
   0  -6  11  121.29   35.50
   0  -6  11  118.39   12.00
   0  -6 -11  112.19   10.60
   0  -6  12    2.00    8.70
   0  -6 -12   -4.10    7.10
   0  -6 -12    0.70    5.90
   0  -6  13   91.39   10.50
   0  -6 -13   69.29    8.90
   0  -6 -13   86.49    9.80
   0  -6  14   -6.10   10.00
   0  -6 -14   -1.60    8.20
   0  -6 -14   12.70    6.50
   0  -6  15   20.40   11.10
   0  -6 -15   28.80   10.00
   0  -6 -15   19.00    6.80
   0  -6  16  -12.80   11.50
   0  -6 -16    9.10   10.50
   0  -6 -16   -6.90    6.50
   0   7   0   10.10   23.10
   0   7   0   -0.80    6.30
   0  -7   0   -1.60    3.50
   0  -7   0   -6.90    4.60
   0  -7   0   -2.50    5.10
   0  -7   0  -23.00   28.60
   0   7  -1   10.90    6.80
   0   7  -1  -21.70   26.00
   0   7   1   16.10    6.10
   0   7   1   33.40   24.60
   0  -7   1   18.10    4.10
   0  -7   1   42.60   27.60
   0  -7   1    5.10    4.50
   0  -7  -1    7.70    6.00
   0  -7   1    9.70    5.80
   0  -7  -1  -20.00   23.50
   0  -7  -1    8.20    4.60
   0  -7  -1   14.40    3.40
   0   7   2   10.60    5.70
   0   7  -2   38.00   29.00
   0   7   2  -22.00   27.20
   0   7  -2    6.60    7.00
   0  -7  -2    2.90    6.40
   0  -7  -2    3.70    2.80
   0  -7   2    7.30   27.70
   0  -7   2    7.00    4.30
   0  -7  -2  -39.50   25.40
   0  -7  -2    1.80    5.90
   0  -7   2   -0.40    5.70
   0  -7   2    7.00    4.40
   0   7  -3  175.08   11.90
   0   7   3  189.98   35.00
   0   7   3  172.88    9.50
   0  -7  -3  154.98    5.80
   0  -7   3  189.48   35.70
   0  -7   3  177.98    8.90
   0  -7  -3  150.08   10.50
   0  -7   3  161.98    9.90
   0  -7   3  166.98    7.70
   0  -7  -3  186.88    8.70
   0  -7  -3  294.97   45.00
   0   7   4  -22.50   24.90
   0   7  -4    1.90    7.20
   0   7   4    8.70    5.00
   0  -7  -4   -8.70   26.10
   0  -7   4    0.30    6.10
   0  -7   4   35.30   28.30
   0  -7   4   -1.30    3.70
   0  -7   4   49.10   45.30
   0  -7  -4   -3.70    2.10
   0  -7  -4   -4.20    5.30
   0  -7  -4   -4.40    5.90
   0  -7   4    4.90    8.80
   0   7  -5  111.69   12.40
   0   7   5  138.09   32.30
   0   7   5  130.09    7.50
   0  -7   5  104.39    8.80
   0  -7  -5  100.89    8.80
   0  -7   5  152.58   33.10
   0  -7   5  103.79    6.20
   0  -7  -5  104.39    8.50
   0  -7  -5  143.99   36.60
   0   7  -6   41.60    9.00
   0   7   6   52.29    6.00
   0   7   6   -7.10   30.70
   0  -7  -6   26.30    6.70
   0  -7   6   19.70    7.10
   0  -7  -6   29.90    6.40
   0  -7   6   44.20    5.00
   0  -7   6   29.20    6.50
   0  -7  -6   65.79   35.60
   0  -7   6   63.99   31.00
   0   7   7  145.79   31.70
   0   7  -7  163.58   14.20
   0   7   7  162.78    6.10
   0  -7  -7  155.08   11.30
   0  -7  -7  150.08   11.10
   0  -7   7  170.68    6.20
   0  -7   7  151.78   38.00
   0  -7   7  146.99    9.20
   0  -7  -7  162.88   37.80
   0  -7   7  142.79   10.80
   0   7   8    4.60   33.00
   0  -7  -8  -57.49   34.20
   0  -7   8   36.20   35.20
   0  -7  -8   -5.80    6.60
   0  -7   8   -5.20    7.20
   0  -7   8   -5.20    5.50
   0  -7   8    5.90    2.60
   0  -7  -8   -1.60    6.60
   0  -7  -9   52.99   61.29
   0  -7  -9   62.59    7.90
   0  -7  -9   61.59    7.50
   0  -7   9   68.39    8.90
   0  -7   9   63.29    6.20
   0  -7   9   98.09   36.10
   0  -7  10    6.20    5.30
   0  -7 -10    6.70    7.40
   0  -7  10  -12.70    8.10
   0  -7 -10   -0.20    6.70
   0  -7  11   42.90    9.50
   0  -7 -11   38.20    8.30
   0  -7  11   42.20    5.30
   0  -7 -11   48.80    7.50
   0  -7 -12    6.90    6.70
   0  -7  12    3.60    8.50
   0  -7 -12    4.00    8.10
   0  -7  13   -0.10   10.20
   0  -7 -13   20.00    7.40
   0  -7 -13    7.50    8.70
   0  -7 -14   -6.20    8.90
   0  -7 -14    0.10    7.50
   0  -7  14    6.50   11.10
   0  -7 -15    4.00    7.50
   0  -7 -15   14.80   11.30
   0   8   0   -0.50    7.30
   0   8   0    9.40   34.30
   0  -8   0   -8.30    6.00
   0  -8   0   55.49   37.60
   0  -8   0   -2.70    4.00
   0  -8   0    0.10    5.50
   0   8   1    6.00    7.20
   0   8  -1   13.50   31.40
   0   8   1  -28.90   31.80
   0   8  -1    6.00    7.50
   0  -8  -1   -0.40    5.70
   0  -8  -1    6.70   33.90
   0  -8   1    2.00    5.10
   0  -8  -1   -5.10    3.70
   0  -8  -1  -16.50    5.90
   0  -8   1    3.50    6.00
   0  -8   1   -1.20    4.40
   0  -8   1    6.80   35.70
   0   8   2  -54.79   30.40
   0   8  -2   -2.20    7.80
   0   8   2    2.60    6.90
   0  -8   2  107.19   42.80
   0  -8   2   -5.50    5.00
   0  -8   2  -11.20    6.60
   0  -8  -2  -15.70   36.90
   0  -8  -2  -14.70    6.60
   0  -8  -2   -5.60    3.20
   0  -8   2   -0.30    4.80
   0  -8  -2   -9.30    6.00
   0   8  -3   10.60    8.30
   0   8   3   11.00    6.50
   0   8   3   29.60   33.80
   0  -8  -3   -1.40    2.70
   0  -8  -3  -11.40    6.40
   0  -8   3    6.90    4.80
   0  -8  -3  -11.40    6.80
   0  -8   3   -1.70    6.00
   0  -8  -3   76.89   38.60
   0  -8   3    5.40    5.40
   0   8   4  -42.80   34.50
   0   8  -4    3.40    8.80
   0   8   4    9.30    6.00
   0  -8  -4   12.90   37.90
   0  -8  -4  -10.40    6.80
   0  -8   4   -0.60    4.40
   0  -8   4    0.40    5.60
   0  -8  -4   -9.10    7.20
   0  -8   4  -11.90    6.30
   0   8   5   18.90    5.40
   0   8   5   13.40   32.90
   0  -8   5   -0.60    6.10
   0  -8   5   -5.00    6.60
   0  -8  -5   -6.00    7.40
   0  -8   5    3.00    4.20
   0  -8  -5   -5.10    6.40
   0  -8  -5   39.00   35.90
   0   8   6  -41.30   41.70
   0  -8  -6   -9.40    7.60
   0  -8  -6    7.20    7.70
   0  -8   6    8.50    6.70
   0  -8  -6  -16.40   37.80
   0  -8   6   15.10    7.00
   0  -8   6    7.10    4.10
   0  -8  -7   61.59    8.10
   0  -8   7   81.69   77.69
   0  -8   7   60.99    8.10
   0  -8   7   79.89    6.20
   0  -8  -7   52.89    8.50
   0  -8   7   66.79    7.50
   0  -8   8    7.80    8.00
   0  -8   8   63.99   58.59
   0  -8  -8    0.90    8.40
   0  -8   8    1.50    6.60
   0  -8  -8    7.70    7.00
   0  -8  -9   20.80    8.10
   0  -8  -9   21.90    9.10
   0  -8   9   26.70    8.80
   0  -8   9   27.50    6.50
   0  -8  10   27.70    9.20
   0  -8  10   30.60    6.40
   0  -8 -10   33.40    8.20
   0  -8 -10   28.00    8.70
   0  -8 -11   37.90    8.30
   0  -8  11   28.60    6.30
   0  -8 -11   23.90    8.80
   0  -8  11   23.40   10.10
   0  -8  12   41.50   10.90
   0  -8 -12   34.00   10.50
   0  -8 -12   40.50    8.40
   0  -8 -13   25.30   11.10
   0  -8 -13   26.10    8.40
   0  -8  13   21.00   11.70
   0  -8 -14   17.00    8.50
   0   9   0   23.40   41.00
   0   9   0   16.50    9.20
   0  -9   0   -0.90    4.70
   0  -9   0   -7.40    8.30
   0  -9   0   27.60   46.30
   0  -9   0   -7.50    6.30
   0   9  -1   19.10    9.80
   0   9   1   59.59   48.50
   0   9   1   19.60    8.90
   0   9  -1  -38.30   43.90
   0  -9  -1   -9.90    6.70
   0  -9   1   -5.10    6.10
   0  -9  -1   -1.50   47.40
   0  -9  -1    0.20    4.20
   0  -9   1   -7.60    8.00
   0  -9  -1   -6.50    8.20
   0   9  -2   32.10   11.50
   0  -9  -2    9.70    7.10
   0  -9   2    1.80    8.10
   0  -9   2   15.70    5.50
   0  -9  -2    9.90    3.70
   0  -9  -2    9.50    7.60
   0  -9   2   17.60    6.30
   0   9   3   22.90    7.60
   0  -9  -3   -7.90    7.10
   0  -9   3   -5.30    8.40
   0  -9   3    3.60    5.80
   0  -9   3   -9.40    7.80
   0  -9  -3  -12.00    8.40
   0   9   4   45.50    7.20
   0  -9  -4   12.70    7.80
   0  -9   4   23.80    6.50
   0  -9   4   20.50    8.30
   0  -9  -4   14.80    7.90
   0  -9   4   31.50    5.70
   0  -9   5    3.80    6.90
   0  -9   5    0.00    5.20
   0  -9  -5  -10.70    8.50
   0  -9  -5   -1.50    8.30
   0  -9   5   -9.80    7.60
   0  -9   6   27.80    7.80
   0  -9  -6   32.20    9.20
   0  -9   6   24.00    8.00
   0  -9  -6   29.10    9.10
   0  -9  -7    4.40    8.90
   0  -9  -7  -10.30    8.00
   0  -9   7   -5.60    7.60
   0  -9   7   -6.00    7.80
   0  -9  -8   25.40    8.30
   0  -9  -8   30.80   10.00
   0  -9   8   30.80    8.90
   0  -9   8   25.70    7.70
   0  -9  -9    5.50    8.90
   0  -9   9   -1.70    9.10
   0  -9  -9   16.60    9.00
   0  -9   9   20.00    7.30
   0  -9  10    2.90    7.20
   0  -9 -10    3.90    7.90
   0  -9 -10   -2.90   10.30
   0  -9  10   -7.00    9.80
   0  -9 -11    6.70    9.90
   0  -9  11    1.90   11.10
   0  -9 -11    7.90    8.80
   0  -9 -12   -6.60    9.00
   0 -10   0   -9.90    9.70
   0 -10   0   10.60    9.40
   0 -10   0  -10.70    7.30
   0  10   1   63.79   11.70
   0 -10  -1   23.90   10.20
   0 -10  -1   30.70    7.90
   0 -10   1   23.40    5.90
   0 -10   1   34.50    7.30
   0 -10   1   17.10   10.00
   0 -10  -2   -6.70    8.20
   0 -10   2   -4.40    6.40
   0 -10   2   -5.90    8.40
   0 -10  -2  -11.10    9.90
   0 -10   2    3.40    6.00
   0 -10  -3   15.50    9.00
   0 -10   3    2.70    9.50
   0 -10  -3    0.80    8.40
   0 -10   3   11.40    6.70
   0 -10   3   20.60    6.80
   0 -10   4    0.90    7.10
   0 -10  -4  -11.30   10.00
   0 -10   4  -10.60    9.30
   0 -10  -4    2.70    7.90
   0 -10   4  -15.40    6.00
   0 -10   5   16.00    9.30
   0 -10  -5   -3.40    8.30
   0 -10  -5  -15.30    8.90
   0 -10   5    4.70    7.50
   0 -10  -6  -14.20    8.40
   0 -10  -6   -7.10    9.00
   0 -10   6    1.90    8.00
   0 -10   6    2.50    8.90
   0 -10  -7   -3.70    8.90
   0 -10  -7   -2.50   10.00
   0 -10   7    1.10    8.30
   0 -10   7    6.90    8.70
   0 -10   8   15.80    8.50
   0 -10  -8   11.70   10.80
   0 -10  -8    0.90    9.80
   0 -10   8    6.60    9.10
   0 -10   9    6.70   10.00
   0 -10   9    2.30    8.30
   0 -11   0    9.70    8.20
   0 -11   0  -11.50   10.70
   0 -11  -1   -0.30    8.50
   0 -11   1   -5.80   10.80
   0 -11   1    4.40    7.50
   0 -11  -1   -8.30   10.80
   0 -11  -2   -3.70   15.90
   0 -11   2    6.10    7.60
   0 -11  -2    2.20    8.70
   0 -11   2   -2.60    6.60
   0 -11   2  -10.70   10.00
   0 -11   3    2.90   10.50
   0 -11   3   12.30    7.50
   0 -11  -3   -8.40    9.40
   0 -11   4   -7.10   10.40
   0 -11  -4   -2.60    9.20
   0 -11   4   10.10    7.70
   0 -11   5    3.40   10.10
   0 -11   5   18.70    8.20
   0 -11  -5    1.40   10.20
  -1   0  20   -5.10    8.60
  -1   0  19    2.50    8.30
   1   0 -19   -2.40    6.20
  -1   0  18    1.20    7.70
   1   0 -18    0.60    5.70
  -1   0  17    0.60    7.40
   1   0 -17   -0.70    5.40
  -1   0  16    4.10    7.00
   1   0 -16   13.40    5.90
   1   0 -16    3.20    5.70
   1   0 -15    3.10    4.60
  -1   0  15   -6.10    6.30
   1   0 -15    4.40    5.50
  -1   0  15   30.20   23.40
   1   0 -15  -38.60   30.30
   1   0 -14    3.30    5.00
   1   0 -14    5.20    4.30
  -1   0  14   20.90   20.30
   1   0 -14    4.70   25.60
  -1   0  13  -11.10   17.60
  -1   0  13   -0.30    5.00
   1   0 -13   -3.10   21.60
   1   0 -13    5.60    4.00
   1   0 -13   -1.40    4.40
  -1   0  12    0.60    4.60
  -1   0  12  -19.80   15.50
   1   0 -12    3.90    3.50
   1   0 -12   -3.80    4.10
   1   0 -12  -18.00   19.00
   1   0 -11    3.10    3.20
  -1   0  11    2.50   13.80
   1   0 -11    6.60   16.20
   1   0 -11   -8.80    3.70
  -1   0  11   -8.00    4.00
  -1   0  10  127.79    6.30
   1   0 -10  120.19   18.30
   1   0 -10  122.89    6.50
  -1   0  10  115.49   18.60
   1   0 -10  127.19    5.60
   1   0  -9   -3.30    3.00
  -1   0   9   -3.20    3.10
   1   0  -9   -3.00   12.40
   1   0  -9    1.30    2.50
  -1   0   9  -17.70   10.60
  -1   0   8  141.29   15.40
   1   0  -8  128.29    5.80
  -1   0   8  138.19    5.50
   1   0  -8  142.69    4.90
   1   0  -8  145.39   16.50
  -1   0   7   -1.20    2.20
  -1   0   7    1.50    7.90
   1   0  -7   -4.50    8.70
   1   0  -7    5.90    2.00
   1   0  -7   -2.00    2.30
   1   0  -6   48.70    2.90
   1   0  -6   44.90    8.90
  -1   0   6   41.20    8.30
  -1   0   6   40.00    3.20
   1   0  -6   38.30    3.50
  -1   0   5    1.80    5.70
   1   0  -5    3.00    5.80
   1   0  -5   -0.20    1.70
   1   0  -5    0.20    1.40
  -1   0   5    0.00    1.50
  -1   0   5   -1.20    1.70
   1   0  -4   65.09    7.30
  -1   0   4   44.30    2.30
   1   0  -4   47.00    2.00
   1   0  -4   45.40    2.60
  -1   0   4   39.20    2.60
  -1   0   3    0.70    1.10
   1   0  -3    0.50    1.10
   1   0  -3    1.10    3.10
  -1   0   3    2.00    3.30
   1   0  -2 2370.96   58.29
  -1   0  -1    0.30    0.30
  -1   0  -2 1783.92   45.70
  -1   0  -2 1700.93   41.30
   1   0   2 1681.23   51.59
  -1   0  -3   -0.20    4.50
  -1   0  -3    1.70    1.20
   1   0   3    3.00    1.10
  -1   0  -3    2.30    0.90
   1   0   3    2.80    1.30
   1   0   3    0.40    4.40
   1   0   4 3296.87   83.79
   1   0   4 3008.30   76.19
  -1   0  -4 3086.09   75.99
  -1   0  -4 3139.79   76.19
   1   0   4 3180.98   76.09
  -1   0  -4 3364.46   83.99
  -1   0  -5    2.40    1.50
  -1   0  -5    0.50    1.80
   1   0   5    1.30    1.70
   1   0   5   -4.20    6.50
  -1   0  -5   -3.60    7.50
   1   0   6 3301.17   78.69
   1   0   6 3334.77   89.29
  -1   0  -6 3165.28   78.49
  -1   0  -6 3395.46   89.69
  -1   0  -6 3195.98   78.79
   1   0   7    1.80    2.40
  -1   0  -7    3.60    2.10
  -1   0  -7   -1.80    2.50
   1   0   7   -4.30   10.20
  -1   0  -7   -6.50   10.40
   1   0   8 4871.01  117.19
   1   0   8 4954.80  131.19
  -1   0  -8 4969.10  131.39
  -1   0  -8 4739.13  116.99
  -1   0  -8 4889.21  117.29
  -1   0  -9    5.50   14.90
   1   0   9    4.50    3.40
   1   0   9   15.80   13.90
   1   0  10  855.71   39.60
  -1   0 -10  847.62   21.60
  -1   0 -10  882.31   22.20
   1   0  10  859.91   22.10
  -1   0 -10  803.32   40.90
   1   0  11    2.50    4.30
  -1   0 -11   25.60   20.00
  -1   0 -11   -1.50    4.00
   1   0  11  -17.10   14.50
  -1   0 -11    6.50    3.40
  -1   0 -12  330.77   10.40
   1   0  12  329.17   11.10
  -1   0 -12  331.87   34.60
   1   0  12  285.47   31.20
  -1   0 -12  315.07   11.10
   1   0  13   -7.80   21.20
  -1   0 -13    2.50    4.70
  -1   0 -13   -1.50   23.70
  -1   0 -13    5.80    4.10
   1   0  13    5.30    5.30
   1   0  14   77.59   26.80
   1   0  14  133.89    9.10
  -1   0 -14  110.59   31.30
  -1   0 -14  147.09    9.20
  -1   0 -14  142.79    7.50
  -1   0 -15    6.00    5.00
  -1   0 -15    3.00    5.50
   1   0  15    6.70    6.40
  -1   0 -16   25.80    6.20
   1   0  16   16.70    6.90
  -1   0 -16   17.70    5.50
  -1   0 -17    3.10    5.80
  -1   0 -17    4.20    8.10
   1   0  17   -6.70    7.30
  -1   0 -18   17.90    6.10
   1   0  18   12.40    7.90
   1   0  19    5.90    8.50
  -1   0 -19    6.40    6.50
  -1   1  19   19.20    7.30
  -1  -1  19    3.10    9.00
   1  -1 -19    7.10    7.10
  -1   1  18   64.59    7.80
   1   1 -18  107.39   12.50
  -1  -1  18   71.29    9.70
   1  -1 -18   74.49    7.40
   1   1 -17   34.80    7.60
  -1   1  17   21.70    6.70
   1   1 -17   20.50    4.80
   1  -1 -17   17.30    6.30
  -1  -1  17   18.80    8.30
   1   1 -16  209.28   11.80
   1   1 -16  176.08    8.30
  -1   1  16  187.48   10.50
   1  -1 -16  186.28   10.00
   1  -1 -16  193.98    9.10
  -1  -1  16  196.88   12.70
  -1   1  15   50.39    6.60
  -1   1  15    8.40   24.30
   1   1 -15   43.50   33.10
   1   1 -15   40.70    4.20
   1   1 -15   50.59    6.70
   1  -1 -15   55.49   29.00
  -1  -1  15   48.30    7.20
   1  -1 -15   61.79    7.10
   1  -1 -15   50.99    6.00
  -1  -1  15   11.60   24.20
   1   1 -14  351.76   13.20
   1   1 -14  361.36   10.80
  -1   1  14  357.26   12.40
   1   1 -14  370.36   42.70
  -1   1  14  344.97   34.50
  -1  -1  14  368.16   13.30
  -1  -1  14  371.16   33.70
   1  -1 -14  357.06   11.40
   1  -1 -14  328.27   13.20
   1  -1 -14  422.56   39.00
   1   1 -13   -3.70   23.90
  -1   1  13   36.20   19.40
  -1   1  13   15.90    4.90
   1   1 -13   17.40    5.40
   1   1 -13   19.90    3.40
  -1  -1  13   52.69   19.60
   1  -1 -13   15.50    4.90
   1  -1 -13    7.70   22.30
   1  -1 -13   12.50    4.50
  -1  -1  13    9.30    5.80
   1   1 -12 1088.29   49.60
  -1   1  12  953.00   43.60
   1   1 -12 1104.69   27.90
  -1   1  12 1072.29   27.00
   1   1 -12 1051.59   26.20
  -1  -1  12 1135.99   46.00
   1  -1 -12 1032.70   46.20
  -1  -1  12 1050.59   27.50
   1  -1 -12 1035.50   25.70
   1  -1 -12 1022.80   27.10
   1  -1 -12 1084.19   27.20
   1   1 -11  169.68   26.60
  -1   1  11  167.18   23.10
   1   1 -11  187.48    8.90
  -1   1  11  175.18    7.40
   1   1 -11  183.78    6.10
  -1  -1  11  188.08   23.30
  -1  -1  11  183.38    8.40
   1  -1 -11  185.18    8.00
   1  -1 -11  188.48    7.00
   1  -1 -11  184.68    5.40
   1  -1 -11  203.08   23.80
   1   1 -10  836.62   21.90
   1   1 -10  828.92   38.00
  -1   1  10  844.12   21.10
  -1   1  10  837.42   35.30
   1   1 -10  813.62   20.40
   1  -1 -10  785.62   35.40
  -1  -1  10  843.82   21.60
  -1  -1  10  794.82   37.40
   1  -1 -10  800.42   21.20
   1  -1 -10  830.82   20.80
   1  -1 -10  807.52   20.20
   1   1  -9  156.38    5.00
  -1   1   9  134.39   18.60
  -1   1   9  151.08    5.90
   1   1  -9  152.78    7.40
   1   1  -9  159.48   20.60
   1  -1  -9  162.18    5.00
  -1  -1   9  166.98    6.90
   1  -1  -9  172.58   18.80
   1  -1  -9  159.38    5.80
   1  -1  -9  155.68    6.50
  -1  -1   9  143.99   22.30
   1   1  -8  807.92   33.50
  -1   1   8  814.42   32.20
   1   1  -8  843.92   21.60
   1   1  -8  809.52   20.30
  -1   1   8  832.62   20.70
  -1  -1   8  833.02   21.20
   1  -1  -8  846.52   20.60
   1  -1  -8  850.21   20.30
   1  -1  -8  808.92   32.50
   1  -1  -8  820.32   20.90
   1   1  -7  221.38   18.10
  -1   1   7  220.98   15.50
   1   1  -7  228.18    6.00
  -1   1   7  225.08    6.50
  -1   1   7  202.58    6.40
   1  -1  -7  226.88    6.10
   1  -1  -7  221.48    7.00
   1  -1  -7  221.78    6.40
   1  -1  -7  218.18   17.10
  -1  -1   7  219.18    6.90
   1   1  -6 1017.70   24.80
  -1   1   6  983.70   24.90
   1   1  -6 1053.29   25.80
  -1   1   6 1037.80   33.40
   1   1  -6  974.50   38.40
  -1   1   6 1048.70   25.00
  -1  -1   6 1045.10   25.40
   1  -1  -6 1045.40   24.90
   1  -1  -6 1025.20   25.30
   1  -1  -6  985.90   33.30
   1  -1  -6 1049.89   25.00
   1   1  -5  257.47    7.60
  -1   1   5  254.97    6.70
  -1   1   5  244.18    6.60
  -1   1   5  245.28   13.30
   1  -1  -5  261.37    6.70
   1  -1  -5  266.77   13.50
   1  -1  -5  251.57    7.00
  -1  -1   5  250.97    7.10
   1  -1  -5  261.57    6.70
  -1   1   4   23.50    5.70
   1   1  -4   25.00    2.30
   1  -1  -4   15.20    5.70
   1  -1  -4   19.30    1.80
   1  -1  -4   21.50    1.60
   1  -1  -4   29.60    2.30
  -1  -1   4   18.00    1.80
   1   1  -3  521.25   13.40
  -1   1   3  510.85   17.40
   1   1  -3  492.65   19.10
   1  -1  -3  517.65   12.70
   1  -1  -3  523.45   12.70
   1  -1  -3  544.35   12.90
  -1  -1   3  546.35   13.10
   1  -1  -3  540.05   13.00
   1  -1  -3  529.05   17.20
   1   1  -2  454.25   11.40
  -1   1   2  440.56   10.80
  -1   1   2  428.46   19.10
   1  -1  -2  436.96   15.00
  -1  -1   2  465.35   11.10
   1  -1  -2  449.06   11.00
  -1  -1   2  445.76   11.40
  -1  -1   2  444.36   16.00
   1  -1  -2  441.76   10.80
   1   1  -1  182.98    9.30
  -1  -1   1  177.18    9.90
   1  -1  -1  143.79    9.20
   1  -1  -1  180.88    4.40
  -1   1   0  838.52   22.10
   1   1   0  949.01   22.30
  -1  -1   0  940.21   28.60
   1  -1   0  927.71   25.90
  -1   1  -1 1369.76   37.00
   1   1   1 1293.87   32.40
   1   1   1 1294.37   43.60
  -1   1  -1 1342.27   32.60
  -1  -1  -1 1406.56   37.90
   1  -1   1 1378.46   37.40
   1   1   2   59.79    1.80
   1   1   2   54.49    7.50
  -1   1  -2   59.19    7.60
  -1  -1  -2   59.59    1.90
   1  -1   2   54.79    2.80
   1  -1   2   62.49    2.30
  -1  -1  -2   70.49    2.40
   1  -1   2   56.59    6.80
  -1  -1  -2   62.99    7.00
  -1  -1  -2   65.99    2.40
  -1   1  -3   27.60    2.70
   1   1   3   33.60    1.60
  -1   1  -3   32.70    6.90
   1   1   3   31.60    6.40
  -1  -1  -3   36.70    7.20
  -1  -1  -3   29.60    2.10
  -1  -1  -3   34.60    2.40
  -1  -1  -3   37.30    1.40
   1  -1   3   24.90    2.00
   1  -1   3   30.70    7.10
  -1   1  -4  111.19    4.50
   1   1   4  117.29    3.50
   1   1   4  124.79    3.60
  -1   1  -4  120.79    3.40
  -1   1  -4  117.99   12.10
   1   1   4  104.09   11.30
  -1  -1  -4  122.39    3.30
  -1  -1  -4  117.69    4.00
   1  -1   4  116.99   10.70
   1  -1   4  120.39    4.20
  -1  -1  -4  119.09    3.70
  -1  -1  -4  114.99   10.70
   1   1   5   71.49    2.90
   1   1   5   84.99   12.00
  -1   1  -5   67.79   11.10
   1   1   5   68.39    3.00
  -1   1  -5   69.69    4.30
  -1   1  -5   73.59    2.60
  -1  -1  -5   76.89   10.90
  -1  -1  -5   69.59    2.90
   1  -1   5   75.99    3.70
  -1  -1  -5   73.69    2.70
   1  -1   5   69.89   10.20
  -1  -1  -5   70.79    3.70
   1   1   6  354.86    9.10
  -1   1  -6  345.57   10.00
  -1   1  -6  347.87    8.70
   1   1   6  318.07   18.90
   1   1   6  340.07    9.10
  -1   1  -6  337.17   20.70
  -1  -1  -6  324.97   18.90
  -1  -1  -6  331.57    9.50
  -1  -1  -6  346.57    8.80
   1  -1   6  332.57    9.40
  -1  -1  -6  347.87    8.80
   1  -1   6  353.96   20.40
   1   1   7  213.58   19.00
   1   1   7  188.18    6.00
  -1   1  -7  190.88    5.50
   1   1   7  190.38    5.90
  -1   1  -7  167.68   19.00
  -1   1  -7  178.48    7.20
   1  -1   7  190.38    6.70
   1  -1   7  181.68   16.60
  -1  -1  -7  189.08    5.40
  -1  -1  -7  165.88   16.50
  -1  -1  -7  179.18    6.40
  -1  -1  -7  186.08    5.70
   1   1   8  351.26   24.10
  -1   1  -8  351.46   10.70
  -1   1  -8  367.76   25.20
   1   1   8  345.77    9.70
  -1   1  -8  344.37    9.20
  -1  -1  -8  309.17   24.10
  -1  -1  -8  339.87    9.40
   1  -1   8  340.57   22.50
  -1  -1  -8  341.57   10.10
   1  -1   8  353.76   10.30
  -1  -1  -8  347.97    9.00
  -1   1  -9   -3.90    3.70
   1   1   9   15.70   14.70
  -1   1  -9    7.50   15.20
   1   1   9    4.00    3.00
  -1   1  -9    5.50    2.30
  -1  -1  -9    8.00   13.90
   1  -1   9   -0.10    3.30
   1  -1   9   13.30   12.70
  -1  -1  -9    4.20    1.60
  -1  -1  -9    2.70    3.00
  -1  -1  -9   -0.20    2.50
   1   1  10  241.88    8.30
  -1   1 -10  242.78    7.30
   1   1  10  187.88   21.70
  -1   1 -10  246.08   24.70
  -1   1 -10  241.98    9.50
  -1  -1 -10  222.68   25.20
  -1  -1 -10  244.48    6.70
  -1  -1 -10  248.78    8.70
   1  -1  10  303.57   26.80
   1  -1  10  245.38    9.10
  -1  -1 -10  240.08    7.80
  -1   1 -11  113.39    5.20
  -1   1 -11  104.39    7.80
   1   1  11   97.49    6.40
  -1   1 -11   53.49   19.80
   1   1  11   54.19   18.70
   1  -1  11  106.69    7.40
  -1  -1 -11  113.29   22.40
  -1  -1 -11  107.79    6.80
   1  -1  11   90.99   18.90
  -1  -1 -11   94.49    5.60
  -1  -1 -11   99.39    3.80
  -1   1 -12  112.69    5.40
  -1   1 -12   99.49   25.30
  -1   1 -12  110.29    9.10
   1   1  12  116.89    7.10
   1   1  12   51.59   22.60
   1  -1  12  116.09   23.50
   1  -1  12  102.09    8.20
  -1  -1 -12   94.79    3.80
  -1  -1 -12  105.19   24.10
  -1  -1 -12  108.19    7.40
  -1   1 -13   37.30    6.00
  -1   1 -13   21.70   27.60
   1   1  13   31.10    5.20
  -1   1 -13   35.10    4.00
  -1  -1 -13   37.50    8.20
   1  -1  13   80.09   23.20
   1  -1  13   36.40    6.00
  -1  -1 -13   31.10   22.70
  -1  -1 -13   32.20    4.10
  -1   1 -14   87.09    9.50
  -1   1 -14  102.69   32.50
   1   1  14   85.59    8.40
  -1   1 -14   97.99    6.40
  -1  -1 -14   90.69    6.80
  -1  -1 -14   35.50   31.40
  -1  -1 -14   85.39    8.20
   1  -1  14   99.19   10.30
   1  -1  14   54.19   26.90
  -1   1 -15   21.60    4.60
   1   1  15   21.50    6.10
  -1   1 -15   29.00    6.80
  -1  -1 -15   20.30    5.70
   1  -1  15   16.40    7.00
  -1  -1 -15   22.00    4.60
   1   1  16   19.30    6.60
  -1   1 -16   50.59    7.40
   1  -1  16   38.00    7.70
  -1  -1 -16   28.30    6.40
  -1  -1 -16   32.20    6.80
   1   1  17   12.00    6.70
  -1   1 -17   20.00    5.10
  -1   1 -17   26.10    7.80
  -1  -1 -17   11.30    6.40
   1  -1  17   13.80    8.00
   1   1  18    6.30    7.40
  -1   1 -18    9.20    5.40
   1  -1  18    9.60    8.60
  -1  -1 -18    8.70    7.10
   1   1  19   -0.10    7.60
   1  -1  19   -4.70    9.20
  -1  -1 -19    1.70    7.10
  -1  -2  19    1.70   10.10
   1  -2 -19    9.80    8.10
  -1   2  18    6.80    8.20
   1  -2 -18    4.70    7.50
  -1  -2  18    5.20    9.20
   1   2 -17   34.40    8.60
   1  -2 -17    2.10    7.20
  -1  -2  17   25.70    9.00
   1   2 -16   -2.80    4.30
  -1   2  16    8.80    5.40
   1   2 -16    1.10    7.50
  -1  -2  16    7.30    8.00
   1  -2 -16    6.30    6.90
   1   2 -15   82.29    5.30
   1   2 -15   91.09   11.20
  -1   2  15   85.59    7.90
  -1   2  15   87.19   39.90
   1  -2 -15   84.99    9.30
  -1  -2  15   73.89    8.10
   1  -2 -15   33.20   48.70
   1   2 -14   -0.50    2.90
   1   2 -14    1.60   30.70
   1   2 -14   -2.00    6.20
  -1   2  14   -0.80   21.80
  -1   2  14    0.40    4.40
  -1  -2  14  -12.80   35.50
   1  -2 -14    3.10    2.50
   1  -2 -14    6.70    5.70
   1  -2 -14    8.90   24.40
   1  -2 -14   -1.20    2.60
  -1  -2  14   10.70    6.80
  -1   2  13   -4.20    4.10
   1   2 -13    3.90   39.80
  -1   2  13    5.50   18.70
   1   2 -13   -6.70    6.00
   1   2 -13   -1.60    2.50
  -1  -2  13   -5.30    5.90
   1  -2 -13    0.80    2.40
   1  -2 -13    4.10    2.60
   1  -2 -13   -2.10    4.70
   1  -2 -13    3.30   20.60
  -1   2  12   -2.80   17.30
   1   2 -12    6.00    5.60
  -1   2  12    5.90    3.80
   1   2 -12   13.40    2.40
   1  -2 -12    8.70    3.00
  -1  -2  12    5.60    5.70
   1  -2 -12   24.10   19.30
   1  -2 -12   10.20    2.80
   1  -2 -12   11.80    4.60
   1  -2 -12    9.90    2.40
  -1   2  11   -5.40   14.80
   1   2 -11    3.00    2.10
  -1   2  11    3.20    3.30
   1   2 -11   -7.40    4.90
   1   2 -11  -12.90   22.00
   1  -2 -11    2.60    4.10
  -1  -2  11    1.00    5.20
   1  -2 -11    1.70    2.00
   1  -2 -11   11.50   17.40
   1  -2 -11    5.80    2.70
   1  -2 -11    3.40    2.00
   1   2 -10   32.10    2.80
  -1   2  10   23.80    3.10
   1   2 -10   19.00   18.40
   1   2 -10   21.00    5.10
  -1   2  10   10.60   14.10
   1  -2 -10   24.00   15.60
  -1  -2  10   26.40    5.00
  -1  -2  10    8.90   18.40
   1  -2 -10   25.20    2.80
   1  -2 -10   29.80    3.00
   1  -2 -10   26.90    2.70
   1  -2 -10   26.20    4.20
   1   2  -9   45.70    2.60
  -1   2   9   60.69   14.40
  -1   2   9   42.90    3.80
   1   2  -9   53.49   17.60
   1   2  -9   45.60    5.00
  -1  -2   9   46.80    4.80
   1  -2  -9   48.20    4.00
   1  -2  -9   55.29   15.50
  -1  -2   9    5.60   13.00
   1  -2  -9   42.70    4.10
   1   2  -8   23.90    4.30
   1   2  -8   42.20   15.30
   1   2  -8   38.20    2.20
  -1   2   8   36.60   11.70
  -1   2   8   34.00    3.20
  -1  -2   8   29.30    4.10
   1  -2  -8   37.60   12.90
  -1  -2   8    1.80   15.00
   1  -2  -8   35.40    4.00
   1  -2  -8   34.80    3.60
  -1   2   7  410.36   21.90
   1   2  -7  451.15   25.60
  -1   2   7  423.36   10.60
   1   2  -7  416.76   12.50
  -1  -2   7  402.56   11.80
   1  -2  -7  415.06   11.50
   1  -2  -7  402.46   22.20
   1  -2  -7  419.86   11.00
   1   2  -6   17.40   11.40
  -1   2   6    5.90    8.60
   1   2  -6   -0.60    3.10
   1  -2  -6   -0.20    2.40
   1  -2  -6    5.40    2.00
  -1  -2   6  -12.40    8.80
  -1  -2   6    1.40    2.50
   1  -2  -6    1.10    8.90
  -1   2   5  742.13   27.70
   1   2  -5  658.63   19.70
   1  -2  -5  764.82   18.30
  -1  -2   5  692.73   18.10
   1  -2  -5  749.53   18.50
   1  -2  -5  782.42   27.80
  -1  -2   5  770.82   18.70
  -1   2   4  443.26   27.60
   1   2  -4  518.45   13.80
   1  -2  -4  525.05   22.00
   1  -2  -4  526.15   13.00
  -1  -2   4  519.65   12.70
  -1  -2   4  492.65   21.80
  -1  -2   4  515.35   13.20
   1  -2  -4  506.65   13.00
  -1  -2   4  526.85   23.40
  -1   2   3  772.92   17.80
   1   2  -3  708.43   18.70
  -1  -2   3  718.73   27.00
   1  -2  -3  711.43   18.20
  -1  -2   3  740.33   27.20
   1  -2  -3  733.53   27.60
   1  -2  -3  746.83   17.90
  -1  -2   3  727.63   18.30
  -1  -2   3  751.62   18.10
   1  -2  -3  758.12   18.20
  -1   2   2   22.50    1.80
   1   2  -2   20.30    2.30
   1   2  -2   27.40    7.50
   1  -2  -2   32.90    8.90
  -1  -2   2   20.00    2.20
   1  -2  -2   22.80    2.30
  -1  -2   2   24.10    1.80
  -1  -2   2   36.20    8.50
   1  -2  -2   23.60    1.90
   1  -2  -2   22.20    2.30
   1   2  -1  263.97    7.60
  -1   2   1  270.57    7.20
   1   2  -1  264.27   15.10
   1  -2  -1  270.97    7.10
   1  -2  -1  265.87    7.20
  -1  -2   1  272.67   15.20
  -1  -2   1  273.47    7.20
   1  -2  -1  272.97   15.40
  -1  -2   1  272.17    7.00
   1   2   0    9.60    1.70
   1   2   0    5.50    6.90
  -1   2   0    9.00    1.60
  -1   2   0    9.10    1.20
  -1   2   0    2.90    6.40
  -1  -2   0   10.10    1.40
   1  -2   0   15.20    1.60
  -1  -2   0    4.30    7.50
  -1  -2   0   10.20    1.40
  -1  -2   0    6.70    1.60
   1  -2   0    6.30    6.10
  -1  -2   0   13.20    1.60
   1  -2   0   13.60    1.80
   1  -2   0   12.10    1.30
   1   2   1  853.61   21.80
   1   2   1  890.01   31.40
  -1   2  -1  901.51   21.60
  -1   2  -1  887.61   22.10
  -1  -2  -1  908.71   31.60
   1  -2   1  852.81   29.40
   1  -2   1  922.21   21.80
  -1  -2  -1  864.41   21.80
   1  -2   1  917.21   21.80
  -1  -2  -1  909.61   21.80
   1  -2   1  898.11   30.40
  -1  -2  -1  902.71   21.90
  -1   2  -2  666.43   17.30
  -1   2  -2  700.53   16.60
   1   2   2  666.73   16.70
   1   2   2  670.83   26.80
  -1  -2  -2  685.73   26.30
  -1  -2  -2  698.33   17.10
   1  -2   2  670.03   25.10
   1  -2   2  702.13   16.80
  -1  -2  -2  652.93   16.70
   1  -2   2  699.93   17.00
  -1  -2  -2  704.73   17.00
  -1   2  -3 1771.12   52.09
  -1   2  -3 1763.42   42.00
   1   2   3 1742.03   52.39
   1   2   3 1728.23   42.00
  -1   2  -3 1738.63   42.90
   1   2   3 1626.54   42.00
  -1  -2  -3 1796.32   52.49
   1  -2   3 1813.02   52.39
  -1  -2  -3 1789.42   42.50
   1  -2   3 1760.72   42.20
  -1  -2  -3 1770.12   42.60
   1  -2   3 1778.32   42.50
   1   2   4  906.11   33.10
   1   2   4  901.81   22.70
  -1   2  -4  975.40   22.80
  -1   2  -4  955.10   33.90
  -1   2  -4  953.30   24.00
  -1  -2  -4  975.40   23.40
   1  -2   4  978.30   23.00
  -1  -2  -4  941.91   23.50
   1  -2   4  928.51   33.50
  -1  -2  -4  908.21   33.20
   1  -2   4  971.60   23.50
   1   2   5 1682.03   52.89
  -1   2  -5 1678.43   53.09
   1   2   5 1665.73   41.20
  -1   2  -5 1654.23   41.80
  -1   2  -5 1744.03   40.80
   1  -2   5 1738.93   40.80
  -1  -2  -5 1726.63   53.29
  -1  -2  -5 1706.13   41.30
   1  -2   5 1678.33   52.69
   1  -2   5 1713.03   41.50
  -1  -2  -5 1707.63   41.60
  -1   2  -6  884.71   34.90
  -1   2  -6  817.42   21.70
  -1   2  -6  839.82   20.20
   1   2   6  834.52   20.30
   1   2   6  809.52   33.30
  -1  -2  -6  816.72   33.70
   1  -2   6  845.92   21.20
  -1  -2  -6  842.82   21.20
   1  -2   6  782.92   32.60
  -1  -2  -6  829.82   20.80
  -1   2  -7 1156.98   43.20
  -1   2  -7 1199.18   29.90
  -1   2  -7 1182.78   28.30
   1   2   7 1130.89   42.80
   1   2   7 1217.58   28.50
  -1  -2  -7 1158.88   42.40
  -1  -2  -7 1170.78   29.20
   1  -2   7 1139.09   29.20
   1  -2   7 1148.09   42.60
  -1  -2  -7 1172.28   28.80
   1   2   8  717.53   33.30
   1   2   8  771.92   19.00
  -1   2  -8  776.72   36.80
  -1   2  -8  781.92   20.90
   1   2   8  812.52   19.40
  -1   2  -8  786.92   19.10
  -1  -2  -8  790.42   20.20
   1  -2   8  772.52   20.20
  -1  -2  -8  782.62   19.50
  -1  -2  -8  762.62   35.50
   1  -2   8  761.12   34.50
  -1   2  -9  587.94   33.00
   1   2   9  636.14   15.80
   1   2   9  586.24   15.20
   1   2   9  504.95   29.30
  -1   2  -9  619.44   15.30
  -1   2  -9  634.44   17.70
   1  -2   9  624.34   32.00
   1  -2   9  629.94   17.00
  -1  -2  -9  603.24   15.00
  -1  -2  -9  614.54   16.50
  -1  -2  -9  612.04   15.70
  -1  -2  -9  657.53   32.70
  -1   2 -10  227.68    9.80
   1   2  10  228.58    7.50
  -1   2 -10  223.88    6.60
   1   2  10  210.88    6.60
   1   2  10  179.38   24.00
  -1   2 -10  229.58   25.90
  -1  -2 -10  225.88   24.70
  -1  -2 -10  224.88    7.10
   1  -2  10  230.88    9.40
   1  -2  10  189.38   22.40
  -1  -2 -10  213.58    6.10
  -1  -2 -10  226.18    9.00
   1   2  11  455.45   13.00
  -1   2 -11  507.45   15.60
   1   2  11  504.85   13.70
  -1   2 -11  494.05   37.70
  -1   2 -11  494.25   13.00
  -1  -2 -11  542.95   36.80
  -1  -2 -11  501.05   14.90
  -1  -2 -11  512.05   13.20
   1  -2  11  513.15   34.70
  -1  -2 -11  486.65   12.60
  -1   2 -12  330.07   37.30
  -1   2 -12  316.67   12.80
  -1   2 -12  308.07    9.00
   1   2  12  307.57   10.10
  -1  -2 -12  292.67   30.80
   1  -2  12  304.07   12.00
  -1  -2 -12  288.17    8.40
   1  -2  12  315.37   33.00
  -1  -2 -12  311.77    9.00
  -1  -2 -12  308.67   11.60
  -1   2 -13   90.29   10.30
  -1   2 -13  100.79   29.90
  -1   2 -13   83.29    5.30
   1   2  13   85.39    7.00
  -1  -2 -13   85.89   27.60
   1  -2  13   68.49   22.80
   1  -2  13   76.39    7.30
  -1  -2 -13   75.49    4.30
  -1  -2 -13   82.39    7.70
  -1  -2 -13   69.09    4.80
  -1   2 -14  100.49   11.10
  -1   2 -14   92.39    5.90
  -1   2 -14  168.08   34.50
   1   2  14   87.99    7.60
  -1  -2 -14  117.39    9.60
  -1  -2 -14   96.49    4.90
   1  -2  14  131.09   29.90
  -1  -2 -14   82.89   38.80
  -1  -2 -14   90.29    4.90
   1  -2  14  108.59   10.40
   1   2  15    0.30    5.10
  -1   2 -15   -9.40    3.80
  -1   2 -15   12.40    7.10
   1  -2  15    8.20    7.40
  -1  -2 -15    3.20    6.70
  -1   2 -16   58.79    4.90
   1   2  16   67.79    9.50
  -1   2 -16   71.19    8.90
  -1  -2 -16   55.09    7.50
   1  -2  16   55.79    8.60
  -1   2 -17   20.40    9.00
   1   2  17   -1.10    6.10
   1  -2  17   10.10    8.70
  -1  -2 -17   15.00    7.40
   1   2  18   29.00    9.90
   1  -2  18   22.30    9.60
  -1  -2 -18   14.90    7.90
   1  -2  19    4.10    9.80
  -1  -2 -19    5.40    8.10
  -1  -3  19   34.10   11.30
   1  -3 -19   30.80    9.60
  -1  -3  18   15.30   10.50
   1  -3 -18    6.40    8.70
   1  -3 -17   82.99    9.10
  -1  -3  17   71.99   10.30
  -1  -3  16   12.20    8.90
   1  -3 -16   12.20    6.70
  -1   3  15  157.58    7.30
   1   3 -15  165.18   13.80
   1  -3 -15  141.09    7.40
  -1  -3  15  159.78   11.00
   1  -3 -15  177.68   11.30
   1   3 -14   41.90    4.50
   1   3 -14  104.89   35.70
   1   3 -14   53.79    7.90
  -1   3  14   60.49    5.40
  -1   3  14   63.29   25.10
   1  -3 -14   29.40   26.40
  -1  -3  14   59.49    8.20
   1  -3 -14   47.40    4.30
   1  -3 -14   48.60    7.30
  -1   3  13  146.49    6.10
   1   3 -13  142.39   11.20
   1   3 -13  130.79    4.80
   1   3 -13  204.58   34.70
  -1   3  13  141.79   24.90
  -1  -3  13  136.09   10.80
   1  -3 -13  145.19   10.10
   1  -3 -13  122.19   28.50
   1  -3 -13  149.99    7.20
  -1  -3  13   59.89   29.80
   1   3 -12   79.39   28.50
   1   3 -12   22.30    6.70
   1   3 -12   25.40    2.10
  -1   3  12   31.10    3.10
  -1   3  12   42.80   19.80
   1  -3 -12   -9.10   21.30
  -1  -3  12   24.40   21.10
   1  -3 -12   22.60    5.40
  -1  -3  12   18.60    6.30
   1  -3 -12   27.50    3.90
   1   3 -11  445.26   38.20
  -1   3  11  435.86   32.70
   1   3 -11  432.16   10.80
   1   3 -11  442.06   15.00
  -1   3  11  431.86   11.40
   1  -3 -11  371.66   17.70
  -1  -3  11  445.16   33.60
   1  -3 -11  445.96   12.50
  -1  -3  11  422.96   13.70
   1  -3 -11  439.86   33.30
  -1   3  10  103.59   18.90
   1   3 -10  106.29    9.20
   1   3 -10  144.69   24.90
  -1   3  10  107.49    4.30
  -1  -3  10  104.39    9.30
   1  -3 -10  115.59   20.90
   1  -3 -10  118.39    6.50
   1  -3 -10  113.09    7.20
  -1  -3  10  127.99   22.40
   1   3  -9  631.64   18.20
  -1   3   9  601.74   33.50
  -1   3   9  613.34   15.20
   1   3  -9  613.24   34.50
  -1  -3   9  610.24   17.30
  -1  -3   9  633.94   33.40
   1  -3  -9  614.84   33.30
   1  -3  -9  601.84   16.90
   1  -3  -9  607.74   16.20
   1   3  -8   75.59    7.60
  -1   3   8   91.59   16.50
  -1  -3   8   82.69   16.10
  -1  -3   8   65.69    3.20
  -1  -3   8   69.09    5.70
   1  -3  -8   71.19    5.10
   1  -3  -8   86.89   17.50
   1  -3  -8   73.89    5.60
  -1   3   7  186.48   20.40
   1   3  -7  197.68    8.80
   1  -3  -7  218.28   22.30
  -1  -3   7  188.58    5.80
   1  -3  -7  190.18    7.20
   1  -3  -7  191.58    6.70
  -1  -3   7  190.58    7.70
  -1  -3   7  189.18   22.40
  -1  -3   7  199.48   22.60
  -1   3   6  802.82   44.00
   1   3  -6  914.11   23.70
  -1  -3   6  905.41   38.10
   1  -3  -6  872.41   35.70
   1  -3  -6  908.61   22.40
  -1  -3   6  887.11   22.00
   1  -3  -6  908.91   22.80
  -1  -3   6  878.71   37.90
  -1  -3   6  913.11   22.80
   1   3  -5  576.44   15.80
   1  -3  -5  559.54   14.50
  -1  -3   5  561.84   27.70
  -1  -3   5  581.74   14.20
   1  -3  -5  541.35   28.30
  -1  -3   5  536.15   14.60
   1  -3  -5  539.95   14.60
  -1  -3   5  550.84   28.60
  -1   3   4  292.07    7.50
   1   3  -4  296.07    9.60
   1  -3  -4  282.47    8.30
  -1  -3   4  289.77   21.10
   1  -3  -4  284.47   24.50
  -1  -3   4  276.87    8.20
   1  -3  -4  297.57    7.50
   1  -3  -4  289.67    8.40
  -1  -3   4  281.47    8.10
  -1  -3   4  289.27   20.10
   1   3  -3   87.59   14.00
  -1   3   3   76.49    3.30
   1   3  -3   65.89    5.20
  -1  -3   3   71.39    3.70
   1  -3  -3   92.99   14.70
   1  -3  -3   66.19    3.60
   1  -3  -3   74.19    4.10
   1  -3  -3   78.19    3.40
  -1  -3   3   76.49    3.90
  -1  -3   3   69.59   13.90
   1   3  -2 1710.73   54.09
   1   3  -2 1661.33   40.80
  -1   3   2 1661.93   40.10
  -1   3   2 1396.26   51.69
   1  -3  -2 1630.74   40.10
  -1  -3   2 1705.23   39.80
   1  -3  -2 1689.93   40.20
  -1  -3   2 1691.83   40.20
  -1  -3   2 1669.93   54.19
  -1  -3   2 1662.03   40.00
   1  -3  -2 1684.73   53.99
   1   3  -1   83.09   13.00
  -1   3   1   80.19    4.00
  -1   3   1   74.39   13.10
   1   3  -1   81.09    4.50
   1  -3  -1   78.29    3.60
  -1  -3   1   86.49    3.20
   1  -3  -1   82.79    3.50
   1  -3  -1   80.59   13.30
   1  -3  -1   81.69    2.90
  -1  -3   1   79.19    3.60
  -1  -3   1   80.69    3.40
  -1  -3   1   98.79   15.10
  -1   3   0  771.02   31.10
  -1   3   0  790.02   20.20
   1   3   0  791.32   33.00
   1   3   0  791.22   20.20
  -1  -3   0  777.52   19.90
   1  -3   0  810.12   19.50
  -1  -3   0  814.72   19.70
  -1  -3   0  787.42   32.90
   1  -3   0  793.12   19.80
  -1  -3   0  816.02   19.50
   1  -3   0  828.42   32.10
  -1   3  -1    0.90    9.80
  -1   3  -1   -0.30    2.40
   1   3   1    1.10    2.10
   1   3   1   -1.10   10.50
  -1   3  -1    1.90    1.60
   1  -3   1    3.30    1.90
   1  -3   1    2.60    1.80
  -1  -3  -1   -3.20    9.70
   1  -3   1    3.40    8.70
  -1  -3  -1    0.70    2.00
  -1  -3  -1    1.80    1.30
  -1  -3  -1    6.50    2.00
   1   3   2  889.81   22.20
  -1   3  -2  915.51   21.90
  -1   3  -2  838.12   24.40
   1   3   2  920.41   36.10
  -1  -3  -2  911.61   22.40
   1  -3   2  862.41   34.30
  -1  -3  -2  909.61   36.00
   1  -3   2  925.61   22.20
  -1  -3  -2  900.91   22.40
  -1  -3  -2  904.71   22.20
   1  -3   2  877.21   34.40
   1  -3   2  909.71   22.20
   1   3   3   38.70    3.00
   1   3   3   52.59   12.60
  -1   3  -3   39.80    5.00
  -1   3  -3   45.20    2.50
   1  -3   3   63.59   13.00
   1  -3   3   43.50    3.20
  -1  -3  -3   44.40   13.80
   1  -3   3   65.89   12.60
  -1  -3  -3   42.40    3.60
  -1  -3  -3   40.40    3.90
   1  -3   3   44.60    3.30
  -1  -3  -3   35.70    2.80
  -1   3  -4  635.14   17.60
   1   3   4  645.84   16.00
   1   3   4  625.94   30.90
   1   3   4  624.64   15.90
  -1   3  -4  666.43   15.90
   1  -3   4  661.73   16.80
   1  -3   4  638.14   29.40
  -1  -3  -4  661.13   31.50
  -1  -3  -4  638.44   16.80
  -1  -3  -4  669.23   16.70
   1  -3   4  663.83   16.30
  -1   3  -5   62.99   14.00
   1   3   5   39.00   13.70
  -1   3  -5   30.40    4.20
  -1   3  -5   35.50    2.30
   1  -3   5   41.90    3.70
   1  -3   5   59.59   14.80
  -1  -3  -5   39.60    3.90
  -1  -3  -5   44.10   14.20
   1  -3   5   34.90    3.30
  -1  -3  -5   29.40    3.10
  -1   3  -6  205.88   21.20
  -1   3  -6  213.18    5.80
   1   3   6  177.08   19.70
  -1   3  -6  201.58    8.30
  -1  -3  -6  213.98    7.30
  -1  -3  -6  232.28   20.70
  -1  -3  -6  203.98    7.50
   1  -3   6  220.88    6.30
   1  -3   6  217.28   20.40
   1  -3   6  204.98    7.30
  -1   3  -7   25.90   14.70
  -1   3  -7   15.80    4.30
   1   3   7   22.20    2.10
   1   3   7   35.00   15.50
  -1   3  -7   20.10    1.90
   1  -3   7   21.40    2.20
  -1  -3  -7   10.30    3.10
   1  -3   7   16.10   15.00
   1  -3   7   15.90    3.70
  -1  -3  -7    6.50   14.60
  -1  -3  -7   16.60    3.90
  -1   3  -8    9.70    4.80
  -1   3  -8   11.00    1.90
  -1   3  -8   28.70   17.90
   1   3   8   -0.20   13.50
   1   3   8   14.40    2.10
  -1  -3  -8    1.70   15.00
  -1  -3  -8   10.80    3.30
   1  -3   8    6.10   14.20
   1  -3   8   11.90    2.00
  -1  -3  -8   10.20    4.00
   1  -3   8    7.20    4.60
  -1   3  -9  231.68    6.50
  -1   3  -9  224.38   10.50
   1   3   9  242.88    6.90
  -1   3  -9  263.27   29.90
   1   3   9  196.38   26.30
   1  -3   9  228.68   24.20
   1  -3   9  207.18    6.90
   1  -3   9  227.08    9.00
  -1  -3  -9  240.48    9.70
  -1  -3  -9  231.38    8.30
  -1  -3  -9  237.58   25.60
   1   3  10   41.60    4.00
   1   3  10   39.60   19.80
  -1   3 -10   37.80    6.20
  -1   3 -10   46.20    3.50
  -1   3 -10   26.20   20.20
  -1  -3 -10   37.70    6.80
  -1  -3 -10   69.59   21.60
  -1  -3 -10   40.20    3.90
   1  -3  10   58.29   20.10
   1  -3  10   34.00    6.70
   1   3  11  300.87    8.90
  -1   3 -11  294.67    8.40
  -1   3 -11  273.37   36.70
  -1   3 -11  306.87   12.60
   1  -3  11  331.97   30.10
   1  -3  11  295.57   11.20
  -1  -3 -11  302.57   11.00
  -1  -3 -11  308.47    9.90
  -1  -3 -11  203.08   33.80
  -1   3 -12   33.30   28.40
   1   3  12   29.30    3.50
  -1   3 -12   23.90    3.00
  -1   3 -12   29.10    6.80
  -1  -3 -12    6.20   25.80
  -1  -3 -12   22.70    5.70
  -1  -3 -12   20.50    3.80
   1  -3  12   23.50   23.30
   1  -3  12   22.80    6.60
  -1   3 -13   66.49    4.70
   1   3  13   68.19    5.90
  -1   3 -13  107.89   30.90
  -1   3 -13   68.09    8.00
  -1  -3 -13   47.40   29.80
   1  -3  13   77.79    8.20
   1  -3  13   97.09   28.00
  -1  -3 -13   69.09    6.10
  -1  -3 -13   73.39    7.40
  -1   3 -14   58.49   42.90
  -1   3 -14   25.50    3.50
   1   3  14   27.20    4.30
  -1   3 -14   46.60    8.20
  -1  -3 -14   28.00    4.00
   1  -3  14   36.20    7.90
  -1  -3 -14   27.00    7.40
   1  -3  14   87.99   33.80
  -1   3 -15   86.79    9.70
   1   3  15   71.99    6.90
  -1   3 -15   53.59    4.80
  -1  -3 -15   72.79    8.30
   1  -3  15   40.10    8.30
  -1  -3 -15   52.99    4.40
  -1  -3 -16    8.20    7.90
   1  -3  16    8.70    8.60
   1  -3  17   34.80    9.70
  -1  -3 -17   34.80    9.00
   1  -3  18   16.60   10.30
  -1  -3 -18    5.40    8.60
   1  -3  19    1.10   10.90
  -1  -4  18   28.20   11.10
   1  -4 -18   11.40    9.40
  -1  -4  17   17.10   10.60
   1  -4 -17    5.60    8.90
   1  -4 -16   29.80    8.70
  -1  -4  16   21.10    8.80
  -1  -4  15   -0.50    8.80
   1  -4 -15    5.50    7.10
   1  -4 -15   -3.40    4.80
   1  -4 -14   16.40    4.80
   1  -4 -14   17.70    7.70
  -1  -4  14   20.60    8.50
   1   4 -13    2.80    7.90
  -1   4  13   42.10   26.60
   1  -4 -13    5.00    4.50
   1  -4 -13   -4.90   28.40
   1  -4 -13   -0.50    6.80
  -1  -4  13   -4.50    7.50
  -1  -4  13  -16.70   27.60
  -1   4  12    2.70   23.40
   1   4 -12    6.80    7.50
  -1  -4  12   -2.80    6.90
   1  -4 -12    2.40    6.00
  -1  -4  12   -6.90   25.10
   1  -4 -12    2.10    4.30
   1  -4 -12   17.40   24.80
   1   4 -11    0.90    6.80
  -1   4  11   31.50   21.20
  -1  -4  11   -7.60    6.30
   1  -4 -11   22.90   22.60
   1  -4 -11    2.70    4.20
  -1  -4  11    2.50   22.80
   1  -4 -11   -7.70    6.10
   1   4 -10   52.79    7.20
  -1   4  10   52.39   20.20
  -1  -4  10   33.90    3.50
  -1  -4  10   47.80   21.00
   1  -4 -10   41.90    4.60
   1  -4 -10   40.70    5.70
  -1  -4  10   47.30    6.40
   1  -4 -10   76.19   24.10
   1   4  -9   -5.20    5.90
  -1   4   9  -10.30   17.10
  -1  -4   9   -0.60    5.40
  -1  -4   9   -5.40    2.30
   1  -4  -9    0.00    3.70
   1  -4  -9   -2.40   18.30
  -1  -4   9  -13.30   18.30
  -1   4   8  159.88   24.70
   1   4  -8  185.78   10.20
   1  -4  -8  189.08    8.20
  -1  -4   8  215.88   24.70
   1  -4  -8  189.08    7.70
   1  -4  -8  188.58   26.50
  -1  -4   8  196.08    8.90
  -1  -4   8  196.18    6.50
   1   4  -7   -6.10    5.10
  -1  -4   7   23.60   22.00
   1  -4  -7    1.80    3.50
  -1  -4   7   13.20   15.40
   1  -4  -7   -0.10    3.80
  -1  -4   7   -5.30    4.30
   1  -4  -7  -13.50   15.00
  -1  -4   7   -2.50    2.70
   1   4  -6  625.04   18.10
   1  -4  -6  612.64   16.80
  -1  -4   6  633.54   35.80
  -1  -4   6  616.84   16.10
   1  -4  -6  604.64   16.30
  -1  -4   6  612.44   35.90
  -1  -4   6  620.74   16.80
  -1   4   5   23.10    2.90
   1   4  -5   23.70    4.80
  -1   4   5    4.90   12.40
   1  -4  -5    6.80   16.10
  -1  -4   5   24.80   14.40
   1  -4  -5   22.10    3.40
  -1  -4   5   23.60    3.70
  -1  -4   5   13.30   17.00
   1  -4  -5   22.10    2.70
   1  -4  -5   20.50    3.60
  -1  -4   5   19.30    3.00
  -1   4   4  692.63   38.20
  -1   4   4  806.92   20.10
   1   4  -4  784.32   21.70
  -1  -4   4  822.42   38.60
   1  -4  -4  776.92   20.60
  -1  -4   4  839.82   19.80
  -1  -4   4  824.22   20.70
  -1  -4   4  805.52   38.40
  -1  -4   4  812.32   20.60
   1  -4  -4  794.12   20.70
   1  -4  -4  936.61   21.70
   1  -4  -4  767.32   36.90
  -1   4   3   21.00    2.80
   1   4  -3   12.90   12.70
  -1   4   3   23.50   15.50
   1   4  -3   15.80    4.10
   1  -4  -3   25.50   14.20
  -1  -4   3   17.60    3.00
   1  -4  -3   22.70    3.00
   1  -4  -3   22.20    3.00
  -1  -4   3   15.20    2.60
  -1  -4   3   10.50   14.80
  -1  -4   3   16.10    2.00
  -1   4   2  863.31   39.30
   1   4  -2  890.11   39.30
   1   4  -2  845.52   22.20
  -1   4   2  835.42   21.40
  -1  -4   2  850.41   21.50
  -1  -4   2  862.71   20.90
   1  -4  -2  822.62   21.40
  -1  -4   2  835.52   21.10
   1  -4  -2  846.92   21.30
  -1  -4   2  811.92   37.60
   1  -4  -2  849.72   38.00
   1  -4  -2  833.22   20.50
  -1   4   1    1.00   12.00
   1   4  -1    0.70    3.40
   1   4  -1   -4.50   12.10
  -1   4   1    2.10    2.90
  -1  -4   1    4.50    2.20
   1  -4  -1    6.30    1.70
  -1  -4   1   13.40   12.50
  -1  -4   1    3.00    2.10
   1  -4  -1    6.30    2.60
   1  -4  -1   -6.40   13.40
   1  -4  -1    1.30    2.60
  -1  -4   1   -0.40    2.80
  -1   4   0   49.20   14.80
   1   4   0   47.80   14.80
  -1   4   0   32.80    4.30
   1  -4   0   33.30    3.40
   1  -4   0   27.90    3.00
  -1  -4   0   36.80    3.50
  -1  -4   0   35.30    3.00
   1  -4   0   35.70    3.10
  -1  -4   0   36.30    2.90
  -1  -4   0   43.30   14.30
   1  -4   0   47.20   14.00
  -1   4  -1  296.47   22.60
  -1   4  -1  290.47    9.60
   1   4   1  300.17    9.20
   1   4   1  305.97   24.10
  -1  -4  -1  297.57    8.60
  -1  -4  -1  290.77    8.90
  -1  -4  -1  322.17   26.70
   1  -4   1  291.27    8.30
  -1  -4  -1  294.87    7.90
   1  -4   1  274.67   23.10
   1  -4   1  294.27    8.60
   1   4   2   76.39   16.40
   1   4   2   64.79    4.60
  -1   4  -2   69.99    6.10
  -1   4  -2   75.09    3.50
   1  -4   2   69.59    4.10
   1  -4   2   60.49   15.30
  -1  -4  -2   67.79    4.80
   1  -4   2   68.29    4.30
  -1  -4  -2   63.09    5.20
  -1  -4  -2   75.49   19.10
  -1  -4  -2   77.19    3.10
  -1   4  -3    4.60    4.10
   1   4   3    7.90    2.70
  -1   4  -3    9.10    2.10
   1   4   3   21.70   15.50
   1  -4   3    5.60    3.00
  -1  -4  -3    0.50    3.20
   1  -4   3   18.20   13.40
  -1  -4  -3   20.80   16.30
   1  -4   3   28.90   12.90
  -1  -4  -3    5.40    3.40
   1  -4   3    5.60    2.70
  -1   4  -4   52.19    3.20
   1   4   4   45.40    3.80
   1   4   4   66.39   18.20
  -1   4  -4   54.59    5.20
   1  -4   4   92.89   18.60
  -1  -4  -4   51.19    4.40
   1  -4   4   46.90    5.00
  -1  -4  -4   60.69   18.60
  -1  -4  -4   41.60    4.70
  -1  -4  -4   41.10    3.60
   1  -4   4   84.79   16.70
   1  -4   4   50.99    4.50
  -1   4  -5  382.16    9.60
   1   4   5  358.86    9.60
   1   4   5  353.36    9.40
  -1   4  -5  371.66   12.60
   1   4   5  376.96   29.50
   1  -4   5  346.57   10.80
   1  -4   5  381.36   10.40
  -1  -4  -5  369.16   11.00
  -1  -4  -5  370.36   11.20
   1  -4   5  374.46   27.90
  -1  -4  -5  341.67   29.90
   1  -4   5  370.16   27.10
  -1   4  -6   89.89    8.20
  -1   4  -6   97.89    3.80
   1   4   6   89.99   19.60
   1  -4   6  111.19   22.60
   1  -4   6  104.79    4.90
  -1  -4  -6  100.49   19.30
  -1  -4  -6   86.19    6.30
  -1  -4  -6   88.19    6.20
   1  -4   6  107.69    6.70
   1  -4   6   95.19   18.20
  -1   4  -7  523.35   16.30
   1   4   7  450.95   33.80
  -1   4  -7  527.55   12.90
   1  -4   7  526.25   13.60
  -1  -4  -7  508.75   35.00
   1  -4   7  482.35   35.20
   1  -4   7  510.75   34.70
  -1  -4  -7  526.65   14.70
   1  -4   7  509.65   15.00
  -1  -4  -7  506.65   14.80
   1   4   8   39.00   20.00
  -1   4  -8   35.40    3.00
  -1   4  -8   35.70    6.20
   1  -4   8   36.50    3.10
  -1  -4  -8   23.40   21.00
  -1  -4  -8   30.80    5.10
   1  -4   8   35.00    5.50
   1  -4   8   26.90   17.40
  -1  -4  -8   29.30    4.10
   1   4   9  207.08   28.00
  -1   4  -9  217.88   11.50
  -1   4  -9  225.08    6.40
   1  -4   9  228.08    7.20
   1  -4   9  220.88   10.20
  -1  -4  -9  223.08    8.80
  -1  -4  -9  225.88    9.40
   1  -4   9  184.68   26.90
  -1  -4  -9  239.78   32.70
  -1   4 -10   16.30    2.30
   1   4  10   -0.20   19.70
  -1   4 -10    7.40   21.90
  -1   4 -10   10.60    6.40
   1  -4  10   17.60    2.50
  -1  -4 -10   14.30    4.30
   1  -4  10   16.00    5.90
  -1  -4 -10   34.70   24.80
  -1  -4 -10    8.60    5.40
   1  -4  10    8.40   22.20
   1   4  11  219.18   33.70
  -1   4 -11  246.68   40.60
   1   4  11  286.77    8.10
  -1   4 -11  302.07    8.30
  -1   4 -11  313.77   13.90
  -1  -4 -11  334.47   11.00
  -1  -4 -11  333.87   40.10
   1  -4  11  312.87   36.50
  -1  -4 -11  317.97   12.70
   1  -4  11  318.87   12.00
  -1   4 -12   52.59   29.60
   1   4  12   13.30    2.30
  -1   4 -12   11.00    2.40
  -1   4 -12    0.30    7.10
   1  -4  12   -1.50   26.70
  -1  -4 -12    9.90    7.00
   1  -4  12    8.70    7.30
  -1  -4 -12   15.50   25.30
  -1  -4 -12   11.10    4.50
  -1   4 -13  106.89   12.60
  -1   4 -13   91.39    4.70
  -1   4 -13  130.89   36.30
  -1  -4 -13  109.99   10.90
   1  -4  13  104.99   28.10
   1  -4  13   97.99   10.10
  -1  -4 -13   52.69   34.40
  -1  -4 -13  109.59    7.80
  -1  -4 -14   32.50    7.30
  -1  -4 -14   32.80    5.20
   1  -4  14   40.00    8.90
  -1  -4 -15   30.70    8.40
  -1  -4 -15   22.10    5.00
   1  -4  15   27.70    9.00
  -1  -4 -16   29.80    9.40
   1  -4  16   13.10    9.20
   1  -4  17   11.80   10.70
  -1  -4 -17    7.40    9.30
   1  -4  18   15.50   11.30
  -1  -4 -18   19.10   10.20
   1  -5 -18   -6.70   10.20
  -1  -5  17   18.30   11.80
   1  -5 -17   36.70   10.30
  -1  -5  16   -5.80   10.00
   1  -5 -16   -1.50    8.30
   1  -5 -16    7.70    5.80
   1  -5 -15   25.40    6.10
   1  -5 -15   31.30    9.10
  -1  -5  15   18.80    9.70
   1  -5 -14    8.40    7.40
   1  -5 -14   13.00    5.70
  -1  -5  14   -1.70    9.00
   1  -5 -13   38.20    8.00
  -1  -5  13   25.40    8.60
   1  -5 -13   39.00    5.90
   1   5 -12   32.60   14.60
  -1   5  12   38.60   27.80
   1  -5 -12   11.70    5.40
   1  -5 -12    7.70    6.70
  -1  -5  12  -15.40   27.60
   1  -5 -12   55.49   30.70
  -1  -5  12   11.00    7.10
   1   5 -11   43.80    8.50
  -1   5  11   35.90   25.20
   1  -5 -11   71.19   30.50
   1  -5 -11   34.50    6.60
  -1  -5  11   26.20    3.10
  -1  -5  11   28.90    7.30
  -1  -5  11   48.70   24.90
   1   5 -10    8.90    7.00
  -1   5  10   -6.80   23.30
  -1  -5  10   -0.20    6.70
   1  -5 -10    1.80    5.40
  -1  -5  10   -6.20   21.60
   1  -5 -10   -8.70    5.60
  -1  -5  10   -0.70    3.10
   1  -5 -10   -8.50   26.20
  -1   5   9   34.00   25.20
   1   5  -9   61.29    8.10
  -1  -5   9   40.40    6.10
   1  -5  -9   51.99    5.20
   1  -5  -9   53.99    6.10
  -1  -5   9   53.59    5.20
   1  -5  -9   72.89   26.00
  -1  -5   9   62.39   25.50
   1   5  -8    0.70    5.90
  -1  -5   8   -5.40    4.80
   1  -5  -8   -1.90    4.80
   1  -5  -8    1.50   36.60
   1  -5  -8   -5.60    4.40
  -1  -5   8    1.70    3.40
  -1  -5   8   14.20   20.40
   1   5  -7  230.58   11.70
  -1  -5   7  221.38    8.30
   1  -5  -7  223.78    9.20
   1  -5  -7  194.78   31.90
  -1  -5   7  204.88    8.90
  -1  -5   7  284.37   32.50
  -1   5   6   83.09    3.90
   1   5  -6   67.29    9.20
  -1   5   6   68.59   28.10
  -1  -5   6   72.49    7.10
   1  -5  -6   76.09    6.80
  -1  -5   6  101.49   40.50
  -1  -5   6   63.49    6.20
   1  -5  -6   74.09    6.30
   1  -5  -6   76.09    3.90
  -1  -5   6   85.19    3.60
   1  -5  -6   86.19   23.40
  -1  -5   6   83.99   23.50
   1   5  -5  579.44   17.60
  -1   5   5  556.34   14.60
  -1   5   5  545.85   35.30
  -1  -5   5  575.84   14.20
  -1  -5   5  542.25   15.40
   1  -5  -5  545.15   15.90
   1  -5  -5  646.14   48.00
   1  -5  -5  559.14   15.90
  -1  -5   5  549.25   38.30
  -1  -5   5  566.74   15.50
  -1  -5   5  564.14   41.80
  -1   5   4  536.25   14.30
  -1   5   4  523.75   36.80
   1   5  -4  545.65   16.70
   1  -5  -4  572.94   38.30
   1  -5  -4  524.15   14.80
  -1  -5   4  521.35   14.80
   1  -5  -4  513.65   14.90
  -1  -5   4  535.65   14.70
  -1  -5   4  545.05   13.70
  -1  -5   4  527.75   36.70
   1   5  -3  985.00   25.80
   1   5  -3  910.81   44.50
  -1   5   3  973.10   47.50
  -1   5   3  963.60   24.40
  -1  -5   3  970.80   24.60
   1  -5  -3  929.71   24.40
  -1  -5   3  970.10   23.80
   1  -5  -3  991.90   48.20
   1  -5  -3  973.50   23.30
  -1  -5   3  969.50   24.30
   1  -5  -3  965.40   24.80
  -1  -5   3  885.41   45.60
   1   5  -2  808.72   41.70
  -1   5   2  843.62   22.20
  -1   5   2  831.52   44.10
   1   5  -2  861.11   23.20
  -1  -5   2  855.21   21.70
   1  -5  -2  851.81   21.00
  -1  -5   2  864.01   21.50
  -1  -5   2  831.42   42.90
   1  -5  -2  859.11   22.00
  -1  -5   2  877.81   22.30
   1  -5  -2  910.31   43.30
   1  -5  -2  858.91   22.30
  -1   5   1  401.66   32.70
  -1   5   1  414.96   12.40
   1   5  -1  392.06   31.10
   1   5  -1  425.06   13.10
   1  -5  -1  415.06   10.90
   1  -5  -1  414.76   12.10
   1  -5  -1  395.26   30.50
   1  -5  -1  430.66   11.80
  -1  -5   1  417.96   31.60
  -1  -5   1  419.06   11.50
  -1  -5   1  430.96   12.50
  -1  -5   1  418.56   11.40
   1   5   0  453.25   13.50
  -1   5   0  458.45   30.80
   1   5   0  419.56   32.00
  -1   5   0  453.45   13.50
  -1  -5   0  451.65   12.00
   1  -5   0  445.26   31.80
   1  -5   0  462.95   12.10
  -1  -5   0  450.85   13.30
   1  -5   0  455.45   12.20
   1  -5   0  470.05   13.20
  -1  -5   0  438.76   32.90
  -1  -5   0  457.75   12.50
   1   5   1 1042.70   49.00
  -1   5  -1 1103.59   28.50
   1   5   1 1097.49   28.10
  -1   5  -1 1080.49   47.40
   1  -5   1 1087.39   27.10
  -1  -5  -1 1078.79   49.10
   1  -5   1 1127.29   49.90
  -1  -5  -1 1097.09   27.50
   1  -5   1 1106.49   27.80
  -1  -5  -1 1092.09   26.80
   1  -5   1 1090.89   27.10
  -1  -5  -1 1105.09   27.80
   1   5   2  816.52   41.70
   1   5   2  707.13   20.40
  -1   5  -2  747.23   20.70
   1  -5   2  750.72   19.70
  -1  -5  -2  743.63   20.00
   1  -5   2  768.22   19.00
  -1  -5  -2  720.53   43.50
   1  -5   2  707.23   39.70
   1  -5   2  743.53   19.20
  -1  -5  -2  760.12   18.50
  -1  -5  -2  747.33   19.40
   1   5   3  368.66   33.50
  -1   5  -3  421.06   13.70
   1   5   3  404.36   11.90
  -1  -5  -3  401.16   10.50
  -1  -5  -3  403.06   12.30
   1  -5   3  424.76   30.10
   1  -5   3  440.16   34.80
  -1  -5  -3  414.76   32.80
   1  -5   3  419.16   11.80
  -1  -5  -3  408.56   12.20
   1  -5   3  413.36   12.00
   1   5   4  398.76   11.20
   1   5   4  420.16   31.80
  -1   5  -4  400.56   13.70
   1  -5   4  388.86   11.70
   1  -5   4  391.26   33.20
   1  -5   4  388.66   30.30
  -1  -5  -4  393.86   12.00
  -1  -5  -4  396.56   12.30
   1  -5   4  388.16   11.60
  -1  -5  -4  349.57   32.10
  -1   5  -5  324.27   12.60
   1   5   5  341.37   32.90
   1   5   5  309.17    9.10
  -1   5  -5  335.87    8.90
   1  -5   5  290.07   29.00
   1  -5   5  308.57   35.80
  -1  -5  -5  314.97   11.10
   1  -5   5  317.77    9.90
  -1  -5  -5  334.17   35.50
   1  -5   5  311.47   10.50
  -1  -5  -5  306.97   10.60
   1   5   6  -11.40   19.70
  -1   5  -6    0.30    6.00
   1   5   6    0.50    2.10
   1   5   6   -5.20    2.10
  -1   5  -6   -0.90    2.40
   1  -5   6   30.60   20.90
  -1  -5  -6   -2.80    4.30
   1  -5   6  -23.90   17.30
  -1  -5  -6   -7.30    4.50
   1  -5   6   -2.10    4.60
  -1  -5  -6   23.90   19.50
   1  -5   6   -4.50    3.50
  -1   5  -7    2.00    2.30
   1   5   7    5.20   21.30
  -1   5  -7    0.00    5.60
  -1  -5  -7   -9.80    5.00
   1  -5   7   -6.50    3.50
   1  -5   7  -12.90   22.30
  -1  -5  -7    6.30   21.90
  -1  -5  -7   -5.40    4.10
  -1   5  -8   19.40    2.50
   1   5   8   14.30   19.40
  -1   5  -8   12.80    6.10
  -1  -5  -8   11.10   23.60
   1  -5   8   18.70   23.00
   1  -5   8   20.40    5.90
   1  -5   8   19.10    3.60
  -1  -5  -8   25.60    5.60
  -1  -5  -8   13.30    4.70
   1   5   9   32.70   21.00
  -1   5  -9    9.60    2.40
  -1   5  -9   10.60    6.40
  -1  -5  -9   -3.30    5.60
   1  -5   9    5.80    3.50
  -1  -5  -9    5.70    5.00
  -1  -5  -9  -13.40   24.90
   1  -5   9    6.90    6.30
   1  -5   9   12.10   24.50
   1   5  10   33.10   25.90
  -1   5 -10   24.10    7.60
  -1   5 -10   17.80    2.40
  -1  -5 -10   16.00   25.60
  -1  -5 -10    7.20    6.00
   1  -5  10   15.40    3.50
   1  -5  10   22.00    7.00
   1  -5  10   37.60   23.30
  -1   5 -11    2.30    8.20
   1   5  11   -4.40   27.50
  -1   5 -11    3.80    2.30
   1  -5  11  -27.50   25.50
  -1  -5 -11    3.20    6.40
   1  -5  11    2.10    3.00
   1  -5  11   11.10    7.50
  -1  -5 -11   -1.90    5.20
  -1  -5 -11    2.50   33.20
   1   5  12   40.10   31.10
   1  -5  12   23.10    8.20
  -1  -5 -12   30.50    5.60
  -1  -5 -12   37.40    7.20
   1  -5  12   10.40   32.50
  -1  -5 -12   30.70   36.70
   1  -5  13   -0.10    7.40
  -1  -5 -13    1.20    5.40
  -1  -5 -13   -2.70    7.20
   1  -5  14   44.50    9.60
  -1  -5 -14   43.40    6.20
  -1  -5 -14   54.59    9.10
  -1  -5 -15    8.60    9.20
  -1  -5 -15   -4.10    5.90
   1  -5  15   -2.90    9.40
  -1  -5 -16   14.00    9.80
   1  -5  16   13.70   10.80
  -1  -5 -16    1.50    6.40
  -1  -5 -17   -0.60    9.30
   1  -5  17   -1.90   11.20
  -1  -6  16   15.00   12.00
   1  -6 -16    9.70    6.80
   1  -6 -16   13.70   10.40
  -1  -6  15    7.00   11.00
   1  -6 -15    2.20    6.70
   1  -6 -15   -7.10    8.50
   1  -6 -14    1.10    6.40
  -1  -6  14   -1.90   10.10
   1  -6 -14    0.90    8.90
   1  -6 -13    7.20    6.20
   1  -6 -13   -0.10    8.60
  -1  -6  13    3.20    9.30
  -1  -6  12   19.60    8.00
   1  -6 -12   19.00    6.30
   1  -6 -12    5.90    7.40
  -1   6  11  102.49   37.00
   1  -6 -11   81.49   44.20
  -1  -6  11   29.10   31.30
  -1  -6  11   60.09    6.10
   1  -6 -11   54.49    6.60
  -1  -6  11   73.19    8.90
   1  -6 -11   62.49    7.80
   1   6 -10    4.50   14.00
  -1   6  10   12.40   37.40
   1  -6 -10   12.70    6.00
   1  -6 -10   17.00    7.40
  -1  -6  10    9.30    7.30
  -1  -6  10  -28.90   26.60
   1  -6 -10   -6.90   32.20
  -1  -6  10   14.20    4.10
   1   6  -9  206.98   13.70
   1  -6  -9  158.68    9.90
  -1  -6   9  176.08   11.40
  -1  -6   9  219.28   35.70
  -1  -6   9  172.38    8.50
   1  -6  -9  163.88   10.00
   1   6  -8   47.90    8.20
   1  -6  -8   23.80    5.50
   1  -6  -8   39.50   25.60
  -1  -6   8   34.10    6.80
  -1  -6   8   -6.70   24.50
   1  -6  -8   28.70    6.00
  -1  -6   8   30.10    4.60
  -1   6   7  112.29   29.60
   1   6  -7  164.58   12.20
  -1  -6   7  168.38    8.50
   1  -6  -7  166.78   32.90
   1  -6  -7  154.28    9.40
  -1  -6   7  189.58   33.40
  -1  -6   7  168.08    5.30
   1  -6  -7  153.88    8.90
  -1  -6   7  162.78    9.70
  -1   6   6   35.10    4.70
  -1   6   6   65.39   26.00
   1   6  -6   28.50    7.30
   1  -6  -6   56.49   26.10
  -1  -6   6   34.10    2.90
  -1  -6   6   24.50    6.30
   1  -6  -6   19.70    5.80
   1  -6  -6   23.40    5.60
  -1  -6   6    3.80   24.90
  -1  -6   6   27.00    5.00
  -1   6   5  294.07    9.30
  -1   6   5  264.57   36.40
   1   6  -5  291.87   13.20
  -1  -6   5  301.07    8.40
   1  -6  -5  240.08   37.90
  -1  -6   5  288.47   10.50
  -1  -6   5  302.97   10.50
  -1  -6   5  310.17   33.40
   1  -6  -5  240.88   11.70
   1  -6  -5  244.18   10.40
   1   6  -4   29.70    6.40
  -1   6   4   29.60   24.70
  -1   6   4   37.20    4.50
  -1  -6   4   32.50    3.40
  -1  -6   4   35.40    5.10
  -1  -6   4   39.70   25.40
   1  -6  -4   26.40    4.80
  -1  -6   4   30.30    4.60
   1  -6  -4   58.89   23.50
   1   6  -3  380.06   34.70
  -1   6   3  345.87   11.60
  -1   6   3  348.97   33.20
   1   6  -3  357.36   13.50
  -1  -6   3  338.87   41.90
   1  -6  -3  368.56   39.30
   1  -6  -3  335.67   11.10
  -1  -6   3  357.66   10.30
   1  -6  -3  340.27    9.20
  -1  -6   3  359.16   11.20
  -1  -6   3  347.07   11.90
   1  -6  -3  325.27   12.00
  -1   6   2   92.49   23.70
   1   6  -2   46.50   22.00
   1   6  -2   92.29    8.90
  -1   6   2   89.49    7.50
   1  -6  -2   79.99    6.90
  -1  -6   2   93.89    7.70
   1  -6  -2   85.09    6.80
   1  -6  -2   94.29    4.40
   1  -6  -2   90.39   25.40
  -1  -6   2  124.49   27.60
  -1  -6   2  110.89    5.80
  -1  -6   2  101.49    5.90
   1   6  -1  336.87   12.60
  -1   6   1  340.17   12.20
  -1   6   1  359.36   32.80
   1   6  -1  307.47   35.70
  -1  -6   1  357.16   10.50
   1  -6  -1  338.07    9.80
   1  -6  -1  332.37   33.70
  -1  -6   1  350.06   10.40
   1  -6  -1  359.16   11.00
  -1  -6   1  363.46   12.00
   1  -6  -1  319.07   11.90
  -1  -6   1  423.36   40.50
  -1   6   0   64.49   23.30
   1   6   0   53.59   22.00
  -1   6   0   54.79    7.50
   1   6   0   44.90    5.90
   1  -6   0   41.00    4.80
  -1  -6   0   54.89    4.90
  -1  -6   0   54.19    5.70
  -1  -6   0   49.99   22.10
   1  -6   0   51.29    4.80
   1  -6   0   16.00   22.10
   1  -6   0   48.90    5.60
  -1  -6   0   37.40    4.80
   1   6   1   54.79    7.80
  -1   6  -1   62.09   21.70
  -1   6  -1   61.89    8.70
   1   6   1   48.60   21.60
  -1  -6  -1   63.59    6.30
   1  -6   1   91.79   24.20
  -1  -6  -1   57.89    6.60
  -1  -6  -1   64.79    4.60
  -1  -6  -1  105.09   27.70
   1  -6   1   71.39    5.00
   1  -6   1   66.29    5.50
   1  -6   1   61.59    6.30
  -1   6  -2   -0.60    5.50
   1   6   2    5.50    4.60
   1   6   2   -1.50   21.30
   1  -6   2    3.50    3.60
   1  -6   2    2.50    3.40
  -1  -6  -2   -8.10    4.80
   1  -6   2   30.00   23.30
   1  -6   2   -1.10    4.60
  -1  -6  -2    0.10    2.40
  -1  -6  -2   -4.80    3.90
  -1  -6  -2   14.50   24.60
   1   6   3   -4.50    4.40
   1   6   3    3.30   20.80
  -1   6  -3   -4.60    5.90
   1  -6   3   41.90   23.70
   1  -6   3   -2.30   21.50
   1  -6   3    6.30    3.20
  -1  -6  -3  -14.00    4.70
   1  -6   3   -0.50    4.00
   1  -6   3    1.00    3.90
  -1  -6  -3  -12.90    5.60
  -1  -6  -3   24.00   24.40
  -1  -6  -3   -3.20    2.10
   1   6   4  -10.80   23.50
  -1   6  -4   -2.70    6.30
   1  -6   4  -18.90   24.30
   1  -6   4  -17.60   20.40
  -1  -6  -4   -1.00    4.70
   1  -6   4    0.90    3.10
   1  -6   4   -8.20    4.30
  -1  -6  -4   -6.80   24.80
   1  -6   4   -7.70    4.40
   1   6   5    4.40    3.70
  -1   6  -5   10.40    6.70
   1   6   5    7.60   24.00
   1  -6   5   33.10   27.30
  -1  -6  -5    1.70    5.70
  -1  -6  -5   29.00   28.50
   1  -6   5   47.20   22.70
   1  -6   5    8.30    4.40
  -1  -6  -5   -6.60    5.50
   1  -6   5   13.40    3.10
   1  -6   5   11.20    5.00
  -1   6  -6   34.60    6.70
   1   6   6   48.60    4.70
   1   6   6   80.89   26.70
   1  -6   6   65.69   24.20
  -1  -6  -6   32.40    5.90
  -1  -6  -6   16.60   27.30
  -1  -6  -6   26.20    6.30
   1  -6   6   30.10    4.80
   1  -6   6   34.40    5.80
  -1   6  -7   38.50    7.90
   1   6   7   41.60   26.10
   1  -6   7   36.10    4.60
  -1  -6  -7   57.19   28.40
  -1  -6  -7   25.60    6.00
   1  -6   7   63.09   24.70
  -1  -6  -7   22.80    5.90
   1  -6   7   27.30    6.40
  -1   6  -8   12.80    7.60
   1   6   8   49.30   27.80
   1  -6   8    6.00   25.60
  -1  -6  -8   -0.20    6.00
   1  -6   8    0.90    5.70
  -1  -6  -8   -2.80   26.00
   1  -6   8   12.90    4.40
  -1  -6  -8   -0.50    5.40
   1   6   9  -40.10   29.10
  -1   6  -9   -5.00    8.00
   1  -6   9   -3.60    7.00
  -1  -6  -9   -3.00    6.20
  -1  -6  -9   -1.00    5.50
   1  -6   9   -1.20    4.30
   1  -6   9  -27.80   30.30
  -1  -6  -9   -3.20   32.20
   1   6  10   11.00   28.30
   1  -6  10    1.80    7.30
   1  -6  10    9.10    4.30
  -1  -6 -10   -2.60    5.70
  -1  -6 -10   -2.00    7.20
  -1  -6 -10  -15.20   33.30
   1  -6  10  -48.50   28.80
  -1  -6 -11   17.80    8.00
  -1  -6 -11   22.30    6.30
   1  -6  11   11.80    7.90
   1  -6  11  106.09   37.30
   1  -6  11   26.20    4.20
   1  -6  12   -1.70    8.30
  -1  -6 -12    1.10    8.30
  -1  -6 -12   -0.60    6.00
   1  -6  13   60.29    9.70
  -1  -6 -13   45.40    6.90
  -1  -6 -13   47.70    9.40
   1  -6  14   -8.50   10.00
  -1  -6 -14    0.80    9.60
  -1  -6 -14   15.80    6.60
   1  -6  15   10.90   10.90
  -1  -6 -15   20.40   10.20
  -1  -6 -15   16.60    6.80
  -1  -6 -16   -0.60   10.50
  -1  -6 -16  -13.50    6.90
   1  -7 -15   -4.40    9.60
   1  -7 -15    2.20    7.50
  -1  -7  15    4.30   17.20
   1  -7 -14    4.10    7.40
  -1  -7  14    1.30   11.20
   1  -7 -14   -0.40    9.00
  -1  -7  13   -2.10   10.20
   1  -7 -13    1.60    9.50
   1  -7 -13    8.90    7.20
   1  -7 -12    9.80    7.00
  -1  -7  12   12.10    9.50
   1  -7 -12    0.60    9.10
   1  -7 -11    6.40    6.70
  -1  -7  11   -8.50    4.70
  -1  -7  11   -9.00    9.00
   1  -7 -11  -13.00    8.50
   1  -7 -10    0.60    6.40
   1  -7 -10   -4.00    8.10
  -1  -7  10   -8.50    4.90
  -1  -7  10  -13.60    8.30
   1  -7  -9   -2.60    6.80
  -1  -7   9    1.10    7.70
  -1  -7   9  -47.60   38.10
  -1  -7   9    5.30    5.40
   1  -7  -9    6.10    6.30
   1  -7  -9   38.00   42.00
  -1   7   8   93.29   33.20
  -1  -7   8   56.89   35.40
   1  -7  -8    4.40    6.60
   1  -7  -8  -20.40   33.80
  -1  -7   8    7.50    5.40
   1  -7  -8    9.00    5.70
  -1  -7   8    7.00    7.30
   1   7  -7   83.89    9.70
  -1   7   7   92.99   34.60
  -1   7   7   89.39    5.30
   1  -7  -7   74.89    7.90
   1  -7  -7   88.69   10.10
  -1  -7   7   75.69    8.20
  -1  -7   7   83.49    7.90
  -1  -7   7   98.49   31.60
  -1  -7   7   97.49    4.80
   1  -7  -7   83.69   32.70
  -1   7   6  -17.70   26.30
  -1   7   6   15.20    4.60
   1   7  -6   12.60    8.30
  -1  -7   6   71.49   29.90
  -1  -7   6    2.90    8.80
   1  -7  -6    7.20    6.60
   1  -7  -6   30.20   29.30
  -1  -7   6    3.30    6.10
  -1  -7   6   18.10    3.30
   1  -7  -6    7.50    5.60
   1   7  -5  133.59   12.20
  -1   7   5  134.89    7.80
  -1   7   5   90.79   31.90
  -1  -7   5  127.29    6.20
   1  -7  -5  141.69   35.90
  -1  -7   5   68.89   31.50
   1  -7  -5  109.99    9.50
   1  -7  -5  117.29   10.00
  -1  -7   5  105.29    8.70
   1   7  -4   11.60    7.40
  -1   7   4   25.30    5.10
  -1   7   4   55.59   29.00
  -1  -7   4    7.50    6.00
   1  -7  -4   14.50    2.60
   1  -7  -4    1.20    6.00
  -1  -7   4   16.80    3.90
  -1  -7   4   66.79   28.00
   1  -7  -4   21.50    6.00
   1  -7  -4   17.40   29.60
   1   7  -3  369.46   15.00
   1   7  -3  361.26   43.10
  -1   7   3  375.16   13.10
  -1   7   3  365.96   38.30
   1  -7  -3  366.06   10.00
  -1  -7   3  338.87   46.80
   1  -7  -3  416.96   46.80
   1  -7  -3  367.66   12.20
  -1  -7   3  376.56   12.00
  -1  -7   3  369.86   11.40
  -1  -7   3  361.16   13.60
   1  -7  -3  358.16   12.90
  -1   7   2   76.09   28.70
   1   7  -2   74.89    7.80
  -1   7   2   72.09    8.70
   1   7  -2   66.09   27.10
   1  -7  -2   49.40    5.90
  -1  -7   2   72.19    6.90
  -1  -7   2   61.49    6.80
   1  -7  -2   18.60   25.90
   1  -7  -2   51.89    9.80
   1  -7  -2   76.39    4.80
  -1  -7   2   56.39    5.20
  -1  -7   2  118.99   35.90
  -1   7   1  434.06   14.90
   1   7  -1  431.26   15.80
  -1   7   1  368.76   38.00
   1   7  -1  453.55   41.90
   1  -7  -1  465.95   47.30
  -1  -7   1  422.56   12.50
   1  -7  -1  442.66   13.50
  -1  -7   1  376.26   13.90
  -1  -7   1  426.86   46.00
   1  -7  -1  414.46   11.80
  -1  -7   1  428.66   12.90
   1  -7  -1  427.26   14.50
  -1   7   0  105.89   29.70
  -1   7   0  117.79   10.40
   1   7   0  148.99   32.60
   1   7   0  112.19    9.60
   1  -7   0  138.09   32.70
  -1  -7   0  118.49    6.50
  -1  -7   0  143.39   31.80
  -1  -7   0  103.99    8.20
  -1  -7   0  105.99    8.60
   1  -7   0  119.69    9.40
   1  -7   0  114.79    6.20
   1  -7   0  118.99    7.50
   1   7   1  648.14   19.30
  -1   7  -1  494.75   42.30
   1   7   1  566.24   44.50
  -1   7  -1  663.93   19.70
   1  -7   1  708.23   52.69
  -1  -7  -1  715.83   50.59
  -1  -7  -1  632.04   16.60
   1  -7   1  642.54   17.10
   1  -7   1  628.94   18.70
   1  -7   1  641.34   17.40
  -1  -7  -1  633.84   17.90
  -1  -7  -1  582.74   18.50
   1   7   2  100.29    9.60
   1   7   2   79.99   28.90
  -1   7  -2   93.99   10.40
  -1  -7  -2  127.19   33.10
   1  -7   2   88.19    7.10
   1  -7   2   67.39   29.60
  -1  -7  -2   84.09    9.70
   1  -7   2   87.19    7.00
  -1  -7  -2   79.49    5.10
   1  -7   2   83.29    7.70
  -1  -7  -2   88.99    8.60
   1   7   3  308.37   12.00
   1   7   3  313.37   38.70
  -1   7  -3  334.67   14.90
  -1  -7  -3  307.87   11.30
   1  -7   3  314.97   11.20
  -1  -7  -3  407.66   47.80
   1  -7   3  310.17   10.40
  -1  -7  -3  303.97   12.20
  -1  -7  -3  284.87    8.80
   1  -7   3  324.87   43.80
   1  -7   3  375.66   49.30
   1  -7   3  311.47   12.20
  -1   7  -4   29.50    7.60
   1   7   4   30.80    5.30
   1   7   4   51.09   27.50
   1  -7   4   21.20    4.20
   1  -7   4   39.90   35.00
   1  -7   4   27.50   34.50
  -1  -7  -4   19.80    6.40
   1  -7   4   22.70    5.90
  -1  -7  -4   26.00   28.10
  -1  -7  -4   20.60    6.60
  -1  -7  -4   15.10    2.20
  -1   7  -5  150.58   12.70
   1   7   5  152.68    8.20
   1   7   5  102.89   28.90
  -1  -7  -5  136.49    9.20
   1  -7   5  144.99    9.20
   1  -7   5  150.18    7.00
   1  -7   5  130.29   11.60
  -1  -7  -5  137.99   10.80
   1  -7   5  216.68   36.10
  -1  -7  -5  221.78   39.80
  -1   7  -6    7.20    7.80
   1   7   6   53.89   32.50
   1   7   6   13.90    4.00
  -1  -7  -6    1.70    6.10
   1  -7   6   15.30   31.80
   1  -7   6   -0.30   10.70
  -1  -7  -6   -2.40    5.70
  -1  -7  -6    3.20   31.00
   1  -7   6    3.00    3.70
   1  -7   6    3.50    5.90
   1   7   7    1.00   28.30
  -1   7  -7   34.70    9.40
   1  -7   7   19.90    6.70
  -1  -7  -7   20.60    6.70
   1  -7   7   48.50   35.90
   1  -7   7   14.50    5.60
   1  -7   7   25.10    3.70
  -1  -7  -7   54.79   36.40
  -1  -7  -7   22.20    6.80
   1   7   8   26.40   30.30
  -1  -7  -8   -1.30    6.40
   1  -7   8   -1.20    3.20
  -1  -7  -8   24.40   36.60
  -1  -7  -8   -3.60    7.60
   1  -7   8    6.00    7.20
   1  -7   8  -53.89   33.20
   1  -7   8   -3.60    5.60
   1  -7   9  -12.30   39.40
  -1  -7  -9    2.40    6.60
   1  -7   9    7.10    5.50
  -1  -7  -9   -1.90    7.00
   1  -7   9    0.80    7.40
  -1  -7 -10   -6.70    6.60
   1  -7  10  -22.70   58.09
   1  -7  10    6.40    5.30
  -1  -7 -10   -0.70    7.10
   1  -7  10   -7.00    8.10
  -1  -7 -11    2.80    8.80
   1  -7  11   10.40    8.50
   1  -7  11   15.00    5.20
  -1  -7 -11   21.30    7.20
  -1  -7 -12    0.40    9.10
   1  -7  12   -6.50    8.40
  -1  -7 -12    3.00    7.00
  -1  -7 -13    6.20    7.10
   1  -7  13    5.10   10.20
  -1  -7 -13    5.80    8.80
   1  -7  14   -9.80   10.60
  -1  -7 -14   -0.60    9.30
  -1  -7 -14    5.80    7.50
  -1  -7 -15   -4.70    7.50
   1  -8 -14    2.10    8.10
   1  -8 -13    0.60   10.40
  -1  -8  13   11.80   11.60
   1  -8 -13   15.50    8.20
   1  -8 -12    1.60    7.70
   1  -8 -12    7.90   10.10
  -1  -8  12   -2.30   10.60
   1  -8 -11   10.60    9.60
   1  -8 -11    9.60    8.10
  -1  -8  11   -0.60    5.80
  -1  -8  11    7.50   10.30
   1  -8 -10   26.10    8.20
  -1  -8  10   18.50    9.40
  -1  -8  10   31.20    6.50
   1  -8 -10   25.10    9.50
  -1  -8   9    2.40    8.50
  -1  -8   9    3.70    6.40
   1  -8  -9   -0.10    7.50
   1  -8  -9    3.80    7.80
   1  -8  -8   34.70    7.90
   1  -8  -8   38.40    8.00
  -1  -8   8   37.80    6.90
  -1  -8   8   50.99    8.60
  -1   8   7   61.79    8.30
  -1  -8   7   37.00   50.19
  -1  -8   7   40.40    7.90
   1  -8  -7   38.20    7.80
   1  -8  -7   45.70    7.60
  -1  -8   7   35.10    6.90
  -1   8   6  135.69    8.30
  -1   8   6   93.29   42.10
  -1  -8   6  106.79   43.50
   1  -8  -6  164.58   47.50
  -1  -8   6   98.69   11.30
   1  -8  -6   98.59    9.10
  -1  -8   6  124.89   10.50
   1  -8  -6   97.99    9.00
  -1  -8   6  128.99    6.70
  -1   8   5  -37.60   34.40
  -1   8   5   46.50    5.90
   1   8  -5   42.50   12.20
  -1  -8   5   42.40    4.70
  -1  -8   5    3.10   45.90
  -1  -8   5   38.00    7.30
   1  -8  -5   29.20    7.70
   1  -8  -5  -47.80   37.70
  -1  -8   5   44.50    6.60
   1  -8  -5   35.70    6.90
   1   8  -4  100.89   13.20
  -1   8   4  112.79    9.70
  -1   8   4   88.79   35.30
   1  -8  -4   84.79    7.90
   1  -8  -4   86.29   39.50
  -1  -8   4   88.89    8.20
  -1  -8   4   93.79    7.50
  -1  -8   4  182.28   56.89
   1  -8  -4   80.89    8.50
  -1  -8   4   88.79    8.60
   1   8  -3   20.30    8.90
  -1   8   3  -34.90   33.60
  -1   8   3   22.50    6.30
  -1  -8   3   13.60    5.50
   1  -8  -3  105.09   36.30
  -1  -8   3   12.40    7.20
  -1  -8   3   26.90    5.00
   1  -8  -3   13.10    2.90
   1  -8  -3   11.20    6.30
   1  -8  -3    9.50    7.10
  -1   8   2   11.90    6.90
   1   8  -2    2.30   38.70
   1   8  -2    9.90    8.30
  -1   8   2   11.10   34.00
   1  -8  -2   36.90   34.10
  -1  -8   2   10.00    5.30
   1  -8  -2    4.10    6.20
   1  -8  -2   -4.10    6.70
  -1  -8   2   16.70    5.10
  -1  -8   2   -5.10    7.00
   1  -8  -2    9.80    3.40
  -1   8   1   -0.80   33.10
  -1   8   1   38.40    7.60
   1   8  -1   31.90    8.30
   1   8  -1   10.70   36.20
   1  -8  -1   18.30    6.40
   1  -8  -1   50.09   33.30
   1  -8  -1   32.00    6.00
   1  -8  -1   36.70    4.10
  -1  -8   1  138.49   40.80
  -1  -8   1   40.50    5.80
  -1  -8   1   20.50    7.30
  -1  -8   1   32.20    4.80
  -1   8   0   10.60   34.20
  -1   8   0    9.70    7.40
   1   8   0    8.50    7.70
   1   8   0   28.70   33.90
   1  -8   0    5.00    4.10
  -1  -8   0    1.00    4.20
   1  -8   0   -1.70    5.20
   1  -8   0   -3.20   38.30
  -1  -8   0    5.70    6.30
  -1  -8   0    2.20   35.40
  -1  -8   0  -14.90    6.20
   1  -8   0  -11.50    6.50
   1   8   1   22.50   32.50
  -1   8  -1   73.39    8.90
   1   8   1   77.99    8.30
  -1  -8  -1   44.50    7.20
   1  -8   1  139.69   37.00
  -1  -8  -1   72.39    7.00
  -1  -8  -1   96.29   42.60
  -1  -8  -1   61.79    6.10
   1  -8   1   69.49    7.10
   1  -8   1   56.29    6.80
  -1   8  -2   -1.50    8.30
   1   8   2   36.30   31.10
   1   8   2    5.50    6.70
  -1  -8  -2   -1.80    7.40
   1  -8   2   10.90    5.30
  -1  -8  -2   59.69   41.80
   1  -8   2   41.80   37.20
  -1  -8  -2    3.90    3.30
  -1  -8  -2   -8.40    6.00
   1  -8   2   -7.30    6.40
   1  -8   2    6.10    5.00
   1   8   3   23.00    6.70
   1   8   3  -10.90   35.70
  -1   8  -3   21.10    8.80
   1  -8   3    4.40    6.50
  -1  -8  -3    2.10    6.60
   1  -8   3    0.60   39.50
  -1  -8  -3   11.20    3.00
   1  -8   3   14.50    4.80
  -1  -8  -3   54.89   39.80
  -1  -8  -3    7.40    6.00
   1  -8   3   16.70    5.60
   1   8   4   47.20    6.60
   1   8   4   35.60   37.00
  -1   8  -4   49.00    9.30
   1  -8   4   45.40    5.20
  -1  -8  -4   37.30    6.80
   1  -8   4   45.80    6.40
  -1  -8  -4   36.70    8.10
   1  -8   4   35.00    7.10
  -1  -8  -4   38.90   36.20
   1   8   5  -51.89   33.80
   1   8   5   11.30    5.50
  -1  -8  -5  -19.40   40.30
   1  -8   5   -3.90    6.20
   1  -8   5  -10.60    6.30
  -1  -8  -5  -10.60    7.30
  -1  -8  -5   -9.10    7.60
   1  -8   5   -0.60    4.30
   1   8   6  -40.70   38.90
  -1  -8  -6    8.40    7.80
  -1  -8  -6   -5.80    7.70
   1  -8   6   12.00    4.30
   1  -8   6    7.50    6.60
   1  -8   6   -1.90    7.00
  -1  -8  -6   55.49   47.10
   1  -8   7   -1.50    6.70
  -1  -8  -7   -0.20    7.70
   1  -8   7   -7.20    7.00
  -1  -8  -7  -14.00    7.20
   1  -8   7   -0.80    4.00
  -1  -8  -8   -0.40    6.70
  -1  -8  -8   -4.50    8.40
   1  -8   8   -7.30    7.60
   1  -8   8    2.40    6.40
   1  -8   9   -7.30    8.50
   1  -8   9   14.30    6.60
  -1  -8  -9   -9.80    7.60
  -1  -8  -9   -5.40    7.80
   1  -8  10  -16.20    9.10
  -1  -8 -10    8.20    7.90
  -1  -8 -10    2.50    9.30
   1  -8  11   -7.70    9.70
   1  -8  11    9.40    6.10
  -1  -8 -11    1.60    7.80
  -1  -8 -11   -2.60    8.70
   1  -8  12    0.20   10.10
  -1  -8 -12    9.40    8.10
  -1  -8 -12   17.10    9.10
   1  -8  13   -1.80   12.60
  -1  -8 -13   11.20   15.40
  -1  -8 -13   -4.20    7.90
  -1  -8 -14    4.10    8.50
   1  -9 -12   -0.10    9.30
   1  -9 -11    4.10    9.70
   1  -9 -11   -0.20    9.10
  -1  -9  11    8.50   10.80
  -1  -9  10  -10.20    9.80
   1  -9 -10   -2.40    9.10
  -1  -9  10   -2.10    7.00
   1  -9 -10    0.20   10.20
   1  -9  -9   12.90   10.00
   1  -9  -9   15.40    8.10
  -1  -9   9    8.80    7.30
  -1  -9   9   10.70    9.30
  -1  -9   8    5.40    7.50
  -1  -9   8    1.60    8.20
   1  -9  -8   -8.00    8.90
   1  -9  -8    2.70    8.40
  -1  -9   7   13.90    8.20
  -1  -9   7   11.50    7.60
   1  -9  -7   -0.90    8.70
   1  -9  -7    0.80    9.00
  -1  -9   6   -8.80    7.30
  -1  -9   6  -12.40    7.60
   1  -9  -6    5.80    7.70
   1  -9  -6   -5.00    7.50
   1  -9  -5    8.80    8.30
  -1  -9   5   -6.10    7.70
  -1  -9   5    8.50    6.90
   1  -9  -5   14.20    7.70
  -1  -9   5   21.20    5.20
  -1  -9   4   24.40    8.40
  -1  -9   4   21.20    6.70
   1  -9  -4   16.90    8.40
   1  -9  -4   24.80    7.70
  -1  -9   4   28.00    5.70
  -1   9   3   22.60    7.60
  -1  -9   3   14.30    6.10
   1  -9  -3   -3.40    8.00
   1  -9  -3   12.20    6.70
  -1  -9   3    4.70    8.30
  -1  -9   3   14.20    6.10
   1   9  -2  123.19   16.50
  -1  -9   2   86.69    9.40
   1  -9  -2   70.69    8.90
  -1  -9   2   66.49    8.40
  -1  -9   2   84.99    8.80
   1  -9  -2   79.59    6.20
   1  -9  -2   76.49    7.80
   1   9  -1   39.00    9.80
  -1   9   1   30.80    8.80
   1  -9  -1   -1.40    7.10
   1  -9  -1   18.70    4.40
  -1  -9   1   20.50    6.50
  -1  -9   1    0.30    8.60
   1  -9  -1   19.10    6.50
  -1   9   0  206.98   14.30
  -1   9   0  115.49   46.20
   1   9   0  218.18   15.20
   1   9   0  175.18   54.09
   1  -9   0  175.08    8.80
  -1  -9   0  175.98   14.10
   1  -9   0  158.88   11.80
  -1  -9   0  168.58    8.80
  -1  -9   0  163.18   10.80
   1  -9   0  291.77   62.19
   1  -9   0  162.38   11.20
   1   9   1  -24.20   46.00
   1   9   1   45.90    9.30
  -1   9  -1   42.10   10.20
   1  -9   1   17.90    6.30
  -1  -9  -1   16.90    4.40
   1  -9   1    5.50    7.70
   1  -9   1   12.80   10.80
  -1  -9  -1   20.80    7.00
  -1  -9  -1   13.90    8.80
  -1  -9  -1   54.89   60.59
   1  -9   1  119.59   56.69
   1  -9   2   54.49    6.80
   1  -9   2   56.59    6.20
  -1  -9  -2   62.89    8.10
  -1  -9  -2   54.79    6.10
  -1  -9  -2   55.69    9.50
  -1  -9  -2  170.88   63.89
   1  -9   2   56.19    8.70
   1   9   3   23.40    7.80
   1  -9   3   12.60    6.10
  -1  -9  -3   -1.20    7.70
  -1  -9  -3    1.90    7.70
   1  -9   3    6.10    5.80
   1  -9   3   -2.80    7.50
   1  -9   4   23.20    7.70
  -1  -9  -4   46.80    9.40
   1  -9   4   43.50    7.70
  -1  -9  -4   45.80    8.50
   1  -9   4   54.29    6.80
   1  -9   5    3.30    6.90
   1  -9   5    3.50    5.20
  -1  -9  -5    7.80    8.30
  -1  -9  -5   -9.50    8.40
   1  -9   5   -0.50    7.50
  -1  -9  -6   23.60    9.10
   1  -9   6   18.20    8.10
   1  -9   6   28.30    7.80
   1  -9   6   28.50    5.00
  -1  -9  -6   24.30    8.50
  -1  -9  -7    6.30    8.70
   1  -9   7   -1.80    7.90
  -1  -9  -7    3.80    9.20
   1  -9   7   -5.00    7.70
   1  -9   8   -0.60    8.70
  -1  -9  -8    8.60    8.50
   1  -9   8    3.70    7.80
  -1  -9  -8    7.80    8.90
  -1  -9  -9    5.40    9.80
   1  -9   9   21.50    7.50
  -1  -9  -9    6.90    7.80
   1  -9   9    8.40    8.80
   1  -9  10   30.20    7.40
  -1  -9 -10   -0.20   10.30
  -1  -9 -10    1.60    9.00
   1  -9  10   -2.60    9.70
  -1  -9 -11    4.90   16.10
   1  -9  11   -8.70   10.80
  -1  -9 -11    8.10    9.00
  -1  -9 -12    6.30    9.20
   1 -10  -9  -16.70   15.70
  -1 -10   9    5.20    8.50
  -1 -10   9    5.60    9.90
   1 -10  -8   14.00   10.60
  -1 -10   8   24.20    9.20
   1 -10  -8    5.50    9.30
  -1 -10   8   13.20    8.70
  -1 -10   7   16.60    8.50
  -1 -10   7   17.80    9.00
   1 -10  -7   11.70    9.20
   1 -10  -7   -5.20   10.00
  -1 -10   6    9.40    7.90
  -1 -10   6   25.70    9.00
   1 -10  -6    0.40    9.70
   1 -10  -6    0.20    9.90
  -1 -10   5   11.10    8.90
   1 -10  -5   -0.90    8.80
   1 -10  -5    5.20    9.30
  -1 -10   5   18.40    7.60
  -1 -10   4    9.70    8.90
   1 -10  -4   16.60    9.00
  -1 -10   4   24.80    6.20
   1 -10  -4   20.00    9.90
  -1 -10   4   26.20    7.20
  -1  10   3   29.20    8.80
  -1 -10   3    4.40    6.50
  -1 -10   3    4.00    8.20
  -1 -10   3   11.70    6.60
   1 -10  -3   -4.90    9.50
   1 -10  -3   -1.40    8.50
  -1 -10   2   17.20    6.80
   1 -10  -2   15.80    8.20
   1 -10  -2   -0.30    9.70
  -1 -10   2    6.10    9.30
  -1 -10   2    8.70    6.30
  -1  10   1   23.50   12.40
  -1 -10   1   -1.90    5.60
   1 -10  -1    5.80    7.60
  -1 -10   1   -5.80    7.20
  -1 -10   1   -9.10    8.30
   1 -10  -1  -13.00    9.10
   1 -10   0   -9.80    7.00
   1 -10   0   -9.80    9.10
  -1 -10   0   -5.60    9.30
   1 -10   0    3.60    7.00
  -1 -10   0   -2.30    6.60
  -1 -10   0   -1.40    7.60
   1  10   1   21.30   10.80
   1 -10   1    8.30    5.70
  -1 -10  -1    0.40    9.70
  -1 -10  -1    4.60    7.70
   1 -10   1    4.10    7.20
   1 -10   1   -7.40    9.40
  -1 -10  -2  -15.40    8.50
   1 -10   2   -1.10    6.10
  -1 -10  -2   -9.90    8.00
   1 -10   2  -11.70    9.10
   1 -10   2   -3.80    6.80
   1 -10   3   37.80    6.90
   1 -10   3   32.00    6.90
  -1 -10  -3   12.70    9.30
  -1 -10  -3   23.50    8.50
   1 -10   3   28.00    9.70
   1 -10   4    5.00    6.30
   1 -10   4   -7.90    8.90
  -1 -10  -4    9.80    8.90
  -1 -10  -4  -15.00    9.40
   1 -10   4    6.10    7.00
  -1 -10  -5   29.90   10.10
   1 -10   5   22.60    9.30
  -1 -10  -5   24.20    9.70
   1 -10   5   33.20    7.80
   1 -10   6    0.10    9.10
  -1 -10  -6    3.50    9.60
  -1 -10  -6   13.60    9.80
   1 -10   6   11.00    8.20
   1 -10   7   38.40    9.00
  -1 -10  -7    0.70    9.60
   1 -10   7   25.80    9.20
  -1 -10  -7   17.80   10.20
  -1 -10  -8   -1.90   10.30
  -1 -10  -8    6.60   10.20
   1 -10   8   14.00    8.90
   1 -10   8    3.00    9.50
   1 -10   9   19.90    8.40
   1 -10   9   14.30   10.40
  -1 -11   5   20.00    8.50
  -1 -11   5   14.90   10.40
   1 -11  -5    6.10   10.50
  -1 -11   4    3.70    7.60
   1 -11  -4   11.80   10.10
  -1 -11   4    6.80   10.50
  -1 -11   3    0.80    7.10
  -1 -11   3   14.60   10.50
   1 -11  -3   -3.20    9.30
  -1 -11   2   -6.70    9.20
   1 -11  -2    2.90   16.40
  -1 -11   2   -1.30    7.00
   1 -11  -2    1.20    8.90
  -1 -11   2    3.80    6.60
   1 -11  -1   -4.00   11.30
   1 -11  -1   -0.50    8.60
  -1 -11   1   12.00   10.60
  -1 -11   1   18.80    7.90
   1 -11   0    3.10    8.20
  -1 -11   0   -2.80    7.80
  -1 -11   0    2.10   10.70
   1 -11   0   -6.40   11.00
   1 -11   1    1.80   11.00
   1 -11   1    3.30    8.00
  -1 -11  -1    9.80    8.30
  -1 -11  -1    7.00   10.80
   1 -11   2   17.80    7.70
   1 -11   2   -9.90    9.40
  -1 -11  -2   -7.50    8.70
  -1 -11  -2    2.60   17.20
   1 -11   2    9.80    6.90
   1 -11   3   13.60    8.10
  -1 -11  -3   17.70    9.00
   1 -11   3   10.40    7.30
   1 -11   3   26.90   11.10
  -1 -11  -4   -1.90    9.70
   1 -11   4  -12.50   10.50
   1 -11   4    3.20    7.80
   1 -11   5    7.80   10.40
  -2   0  20   16.40    9.10
  -2   0  19   -1.40    8.30
   2   0 -18   40.70    6.00
  -2   0  18   61.49    8.40
   2   0 -17    6.70    6.40
  -2   0  17    8.00    7.40
   2   0 -17    3.70    5.10
  -2   0  16   19.70    7.00
   2   0 -16   21.90    6.20
   2   0 -16   25.00    5.20
  -2   0  15   -0.80    6.40
  -2   0  15    3.70   21.50
   2   0 -15    4.10    5.30
   2   0 -15    3.80    4.70
   2   0 -15  -22.80   29.00
   2   0 -14   38.00   25.30
   2   0 -14   40.30    5.40
   2   0 -14   47.30    4.80
  -2   0  14   59.89   20.30
  -2   0  14   43.50   10.30
  -2   0  13    2.20    5.20
  -2   0  13    6.10   16.70
   2   0 -13    5.50    3.90
   2   0 -13   -5.50    4.40
   2   0 -13    7.30   20.50
   2   0 -12    7.60    4.10
   2   0 -12   16.40    3.60
  -2   0  12   20.60   15.20
   2   0 -12   -4.40   18.40
  -2   0  12   14.20    4.80
   2   0 -11   -2.30    3.20
  -2   0  11    1.30    4.20
   2   0 -11   -3.10    3.70
  -2   0  11    0.00   12.60
   2   0 -11  -15.10   14.70
  -2   0  10   -2.60   11.10
   2   0 -10   12.70   13.90
  -2   0  10    0.30    3.70
   2   0 -10   -4.70    3.30
   2   0 -10    4.10    2.80
  -2   0   9   -2.00   10.20
  -2   0   9   -1.50    3.10
   2   0  -9   -6.80   11.10
   2   0  -9    1.10    2.60
   2   0  -9   -3.30    5.30
   2   0  -8   99.79    4.40
   2   0  -8  119.99   15.00
  -2   0   8   93.89    5.10
  -2   0   8  105.39   13.70
   2   0  -8   90.99    5.20
   2   0  -7    1.70    1.90
   2   0  -7   -0.10    2.40
  -2   0   7   -1.60    2.30
  -2   0   7    2.10    6.90
   2   0  -7   10.20    8.00
  -2   0   6   42.60    3.10
   2   0  -6   48.70    2.80
   2   0  -6   53.09    8.30
  -2   0   6   62.89    9.30
   2   0  -6   44.80    3.60
   2   0  -5    1.30    5.10
  -2   0   5    0.10    1.60
   2   0  -5    1.60    1.80
   2   0  -5    2.10    1.30
  -2   0   5   -0.20    4.70
   2   0  -4 1900.31   49.00
   2   0  -4 1817.32   45.70
  -2   0   4 1998.40   49.10
   2   0  -4 1920.51   45.40
  -2   0   4 1789.62   45.60
  -2   0   4 1940.01   45.50
  -2   0   3   -0.90    2.40
   2   0  -3    1.60    1.30
   2   0  -3    3.10    2.70
  -2   0   3    2.20    1.10
  -2   0   3    0.90    1.10
   2   0  -2 2495.75   59.79
  -2   0   1    0.80    0.70
   2   0  -1    3.00    1.40
   2   0   0 3892.91   95.79
  -2   0  -1    1.40    0.80
   2   0   1   -4.50    2.90
  -2   0  -1    1.40    0.80
  -2   0  -1    2.50    3.10
  -2   0  -2  358.56    9.10
   2   0   2  343.17    9.10
   2   0   2  360.56   14.30
   2   0   2  373.86    9.00
  -2   0  -2  373.86   14.90
  -2   0  -2  353.26    8.90
  -2   0  -3   -0.40    1.40
   2   0   3   -0.20    1.30
  -2   0  -3   -2.30    5.20
   2   0   3    0.00    1.40
   2   0   3    1.50    5.10
  -2   0  -3    1.60    1.20
  -2   0  -4  416.36   19.00
  -2   0  -4  444.86   10.80
   2   0   4  447.36   11.20
  -2   0  -4  446.46   11.30
  -2   0  -4  440.86   11.00
   2   0   4  417.96   18.80
   2   0   5   -1.40    1.90
  -2   0  -5   -1.20    1.00
   2   0   5    2.90    7.50
  -2   0  -5   -2.70    7.50
  -2   0  -5    1.00    2.10
  -2   0  -5    3.70    1.70
   2   0   6  915.41   22.60
  -2   0  -6  884.21   33.70
  -2   0  -6  933.31   22.80
   2   0   6  909.81   33.70
  -2   0  -6  872.91   22.40
  -2   0  -6  936.51   22.00
  -2   0  -7    1.30   10.50
  -2   0  -7    0.50    1.20
  -2   0  -7    5.50    2.30
   2   0   7    0.60    2.70
   2   0   7   -7.30    9.90
  -2   0  -7   -1.40    2.70
  -2   0  -8   57.69    6.40
  -2   0  -8   79.19   15.00
  -2   0  -8   74.49    2.80
  -2   0  -8   82.99    4.40
   2   0   8   66.39    5.30
   2   0   8   91.19   17.10
  -2   0  -9   10.60   13.50
   2   0   9    7.30   14.50
  -2   0  -9   -7.20    3.30
  -2   0  -9    2.90    2.80
  -2   0  -9    0.60    1.30
   2   0   9   -1.10    3.50
  -2   0 -10  295.37    9.90
   2   0  10  299.27    9.90
  -2   0 -10  293.67    9.20
   2   0  10  330.87   27.60
  -2   0 -10  294.57   26.20
   2   0  11    1.90    4.40
  -2   0 -11    1.60    3.50
   2   0  11    9.80   18.00
  -2   0 -11   32.40   18.60
  -2   0 -11   -4.10    4.10
  -2   0 -12  208.98    9.20
   2   0  12  200.08   28.60
   2   0  12  197.38    9.20
  -2   0 -12  188.28   29.20
  -2   0 -12  220.88    8.20
  -2   0 -13   -2.10    4.90
  -2   0 -13    1.40    4.50
  -2   0 -13  -19.70   22.20
   2   0  13   13.50   20.80
  -2   0 -14   94.59    8.50
  -2   0 -14  114.89   32.80
   2   0  14  107.19   29.30
  -2   0 -14   95.99    7.20
   2   0  14   97.39    9.40
  -2   0 -15   -8.00    5.50
   2   0  15    2.00    6.40
  -2   0 -15    3.30    5.00
  -2   0 -16   50.09    6.20
   2   0  16   41.00    7.70
  -2   0 -16   52.59    6.50
   2   0  17    5.90    7.80
  -2   0 -17   -0.90    6.00
   2   0  18   -1.30    7.70
  -2   0 -18    7.60    6.10
   2   0  19   12.70    8.70
  -2   0 -19   10.50    6.70
   2  -1 -20    4.50    7.30
  -2  -1  20   11.80    9.70
  -2   1  19    4.40    7.10
  -2  -1  19    7.10    9.30
   2  -1 -19    2.30    6.90
   2   1 -18   12.60    7.80
  -2   1  18   10.90    7.20
  -2  -1  18    5.50    8.50
   2  -1 -18    3.20    6.70
   2   1 -17   -1.60    4.40
  -2   1  17   10.00    6.80
   2   1 -17    2.10    7.30
  -2  -1  17   -9.20    7.90
   2  -1 -17    0.60    6.30
   2   1 -16   19.10    4.30
   2   1 -16   23.40    6.90
  -2   1  16   20.00    6.20
   2  -1 -16   20.50    5.90
   2  -1 -16   26.50    5.10
  -2  -1  16   29.20    7.70
   2   1 -15   23.80    6.40
   2   1 -15   62.39   31.20
  -2   1  15   25.90   21.50
   2   1 -15   13.20    3.70
  -2   1  15   17.70    5.90
   2  -1 -15   10.10    5.30
  -2  -1  15   21.30   22.80
   2  -1 -15   28.40   27.60
   2  -1 -15   22.30    4.80
  -2  -1  15   19.40    7.20
   2   1 -14   33.10    3.70
  -2   1  14   40.90    5.60
  -2   1  14   27.80   20.20
   2   1 -14   40.00    6.20
   2   1 -14   45.60   27.30
   2  -1 -14   43.90   25.10
   2  -1 -14   36.20    4.60
  -2  -1  14   43.40    6.90
  -2  -1  14   33.50   19.60
   2  -1 -14   38.00    5.50
   2   1 -13   50.99    6.00
  -2   1  13   70.59   18.50
  -2   1  13   39.70    5.10
   2   1 -13   53.89    4.80
   2   1 -13   44.80   22.70
  -2  -1  13   40.50    7.70
   2  -1 -13   47.00    5.20
   2  -1 -13   78.49   20.80
  -2  -1  13   47.90   18.60
   2  -1 -13   50.29    6.20
   2   1 -12  170.08    9.30
  -2   1  12  164.28   23.40
   2   1 -12  171.78    6.20
  -2   1  12  150.28    7.80
   2   1 -12  214.78   30.40
  -2  -1  12  181.38    9.00
   2  -1 -12  163.78    7.80
   2  -1 -12  165.68    5.20
   2  -1 -12  165.18   23.40
  -2  -1  12  190.58   23.40
   2   1 -11   65.09   18.70
  -2   1  11   56.49   14.20
   2   1 -11   52.09    4.10
  -2   1  11   56.79    6.00
   2   1 -11   50.89    7.10
  -2  -1  11   70.19   15.70
   2  -1 -11   64.49    5.70
   2  -1 -11   39.70   16.40
  -2  -1  11   54.59    5.30
   2  -1 -11   48.40    5.20
   2  -1 -11   52.89    3.50
  -2   1  10 1169.38   28.90
  -2   1  10 1135.89   41.90
   2   1 -10 1178.68   29.80
   2   1 -10 1149.89   28.30
   2   1 -10 1136.39   44.20
   2  -1 -10 1171.68   28.80
   2  -1 -10 1175.18   28.20
  -2  -1  10 1130.39   29.30
  -2  -1  10 1145.39   43.00
   2  -1 -10 1164.88   29.10
   2  -1 -10 1162.58   41.80
  -2   1   9  320.17   20.90
   2   1  -9  337.47   10.80
  -2   1   9  340.27    9.90
   2   1  -9  341.17    9.10
   2   1  -9  345.27   23.50
   2  -1  -9  342.27   10.10
  -2  -1   9  351.26   21.30
   2  -1  -9  360.56   22.00
  -2  -1   9  362.66   10.60
   2  -1  -9  341.37    9.80
   2  -1  -9  353.46    9.10
   2   1  -8 1278.17   31.70
   2   1  -8 1315.27   32.80
  -2   1   8 1318.07   32.10
  -2   1   8 1268.87   41.80
   2   1  -8 1301.97   44.00
   2  -1  -8 1303.47   32.00
   2  -1  -8 1335.07   31.70
  -2  -1   8 1327.37   32.50
   2  -1  -8 1332.47   32.30
   2  -1  -8 1292.67   41.50
  -2  -1   8 1318.87   43.10
   2   1  -7  890.91   32.00
   2   1  -7  793.72   22.50
  -2   1   7  839.42   29.40
  -2   1   7  885.21   21.20
   2   1  -7  854.51   20.80
   2  -1  -7  856.41   29.60
   2  -1  -7  866.91   21.20
  -2  -1   7  863.31   21.60
   2  -1  -7  855.71   21.40
   2  -1  -7  882.01   20.90
  -2  -1   7  831.92   30.10
  -2   1   6 3571.64   86.59
   2   1  -6 3694.23   95.69
   2   1  -6 3588.84   87.29
  -2   1   6 3665.13   93.69
   2  -1  -6 3546.95   86.69
   2  -1  -6 3578.24   86.49
   2  -1  -6 3498.85   86.79
  -2  -1   6 3584.54   86.89
   2  -1  -6 3710.93   93.49
  -2  -1   6 3759.22   95.09
   2   1  -5  517.35   20.60
  -2   1   5  526.75   13.00
   2   1  -5  518.35   13.80
  -2   1   5  498.85   18.40
   2  -1  -5  529.35   13.10
   2  -1  -5  542.45   13.00
  -2  -1   5  530.95   13.50
   2  -1  -5  519.75   13.00
  -2  -1   5  531.05   19.90
   2  -1  -5  523.65   18.40
   2  -1  -5  527.35   13.20
   2   1  -4 2452.05   61.79
  -2   1   4 2590.64   65.79
   2  -1  -4 2516.55   61.19
   2  -1  -4 2528.65   61.29
  -2  -1   4 2684.33   67.69
   2  -1  -4 2513.65   61.39
  -2  -1   4 2593.14   61.59
   2  -1  -4 2508.55   61.29
   2  -1  -4 2664.93   65.49
   2   1  -3 1001.50   25.30
  -2   1   3 1012.50   24.80
  -2   1   3 1054.09   24.90
  -2   1   3 1034.20   28.80
  -2  -1   3 1029.80   30.70
   2  -1  -3 1023.40   28.00
   2  -1  -3 1056.59   24.80
   2  -1  -3  994.20   24.80
  -2  -1   3 1025.60   30.50
  -2  -1   3 1047.20   25.00
   2   1  -2  590.24   14.90
  -2   1   2  596.54   14.50
  -2   1   2  592.04   14.50
  -2   1   2  614.34   18.00
   2   1  -2  601.84   19.90
  -2  -1   2  575.84   15.00
   2  -1  -2  586.54   14.50
  -2  -1   2  606.44   20.20
   2  -1  -2  583.24   18.20
  -2   1   1 2130.29   51.09
   2   1  -1 2086.29   51.29
   2   1  -1 2231.98   57.29
  -2   1   1 2078.79   51.09
  -2   1   1 2164.58   51.09
  -2  -1   1 2103.69   51.09
   2  -1  -1 2199.48   54.39
  -2  -1   1 2032.70   51.09
   2  -1  -1 2190.98   54.69
  -2  -1   1 2086.29   51.29
   2  -1  -1 2038.00   51.09
  -2  -1   1 2279.47   57.39
  -2   1   0  715.63   17.40
  -2   1   0  724.73   17.20
   2   1   0  715.23   22.80
   2   1   0  677.93   17.40
   2   1   0  713.23   17.70
  -2   1   0  716.53   17.20
  -2   1   0  721.53   21.40
  -2  -1   0  695.03   17.30
  -2  -1   0  723.33   22.90
   2  -1   0  715.53   21.20
  -2   1  -1  801.22   18.80
  -2   1  -1  790.62   19.20
  -2   1  -1  808.22   24.30
  -2   1  -1  798.12   18.90
   2   1   1  762.82   24.70
   2   1   1  766.82   18.90
   2  -1   1  731.93   19.10
  -2  -1  -1  803.42   25.10
   2  -1   1  772.82   24.10
  -2  -1  -1  782.12   19.00
  -2  -1  -1  756.92   18.90
  -2  -1  -1  771.32   18.90
   2  -1   1  792.12   18.90
   2   1   2 4330.67  103.19
   2   1   2 4395.26  110.19
  -2   1  -2 4264.67  102.99
  -2   1  -2 4188.28  103.39
  -2   1  -2 4463.55  109.89
   2  -1   2 4310.97  103.19
   2  -1   2 4592.04  110.19
  -2  -1  -2 4099.49  103.19
  -2  -1  -2 4070.69  103.09
  -2  -1  -2 4496.85  110.39
  -2   1  -3  200.48    5.00
  -2   1  -3  193.18   12.70
  -2   1  -3  190.88    6.00
   2   1   3  191.68   13.30
  -2   1  -3  195.98    5.10
   2   1   3  188.18    5.20
   2   1   3  191.48    5.20
  -2  -1  -3  196.68    5.30
  -2  -1  -3  191.58    5.20
  -2  -1  -3  189.58    5.50
   2  -1   3  202.08    5.60
  -2  -1  -3  195.38   12.60
   2  -1   3  192.68   12.80
   2   1   4   65.69   10.30
   2   1   4   54.69    2.80
  -2   1  -4   65.49    2.40
  -2   1  -4   51.69    2.30
  -2   1  -4   48.60    9.30
   2   1   4   54.79    2.70
  -2   1  -4   52.19    3.80
   2  -1   4   57.59    3.30
  -2  -1  -4   56.49    2.60
   2  -1   4   74.39   10.80
  -2  -1  -4   61.69    2.40
  -2  -1  -4   54.29    3.30
  -2  -1  -4   79.89   11.00
   2   1   5  181.98    5.70
   2   1   5  193.48   15.20
  -2   1  -5  199.38    5.60
  -2   1  -5  227.58   17.20
   2   1   5  198.08    5.70
  -2   1  -5  197.18    5.40
  -2   1  -5  193.98    6.70
  -2  -1  -5  192.58   15.10
   2  -1   5  195.08    6.20
  -2  -1  -5  188.08    5.90
  -2  -1  -5  197.18    5.40
   2  -1   5  181.58   14.60
  -2  -1  -5  194.18    5.40
   2   1   6  546.35   14.10
   2   1   6  522.65   15.50
  -2   1  -6  560.34   25.90
   2   1   6  546.65   26.70
  -2   1  -6  552.74   13.80
  -2  -1  -6  566.54   13.80
  -2  -1  -6  547.15   25.50
   2  -1   6  587.54   25.70
   2  -1   6  546.05   14.40
  -2  -1  -6  564.84   14.50
  -2  -1  -6  548.85   13.90
  -2   1  -7    7.80    2.00
   2   1   7    5.00    2.40
  -2   1  -7   23.00   13.40
   2   1   7   17.60   11.40
  -2   1  -7    5.90    3.40
  -2  -1  -7    8.80    3.00
  -2  -1  -7    5.10    2.00
   2  -1   7   10.90   10.90
  -2  -1  -7    1.20   10.80
  -2  -1  -7   10.10    1.60
   2  -1   7    5.20    3.10
   2   1   8   71.49   15.30
  -2   1  -8   76.59   16.20
  -2   1  -8   81.69    6.40
   2   1   8   85.69    4.80
  -2   1  -8   81.69    3.90
   2  -1   8   79.19    5.70
  -2  -1  -8   78.29   16.60
  -2  -1  -8   89.19    5.40
   2  -1   8  125.09   18.20
  -2  -1  -8   88.39    3.50
  -2  -1  -8   84.99    4.20
  -2   1  -9   14.00   14.80
   2   1   9   23.70   15.80
  -2   1  -9    9.60    2.60
   2   1   9    5.20    3.20
  -2   1  -9    3.10    4.10
   2  -1   9    9.90   13.00
  -2  -1  -9    7.10    3.30
  -2  -1  -9  -15.40   14.20
  -2  -1  -9   10.40    1.80
  -2  -1  -9    7.80    2.70
   2  -1   9    3.70    3.90
  -2   1 -10   55.19    7.20
  -2   1 -10   61.89    4.70
  -2   1 -10   57.99   18.90
   2   1  10   56.19    5.60
   2   1  10   54.59   16.40
  -2  -1 -10   57.99   18.90
  -2  -1 -10   59.09    3.30
   2  -1  10   51.49    5.00
  -2  -1 -10   67.19    6.10
  -2  -1 -10   45.60    4.80
   2  -1  10   79.79   17.70
  -2   1 -11   19.80   19.60
  -2   1 -11    3.80    4.70
   2   1  11    8.20    4.00
  -2   1 -11    7.80    3.10
   2   1  11  -28.00   18.00
  -2  -1 -11   -2.10   16.80
   2  -1  11   11.20   18.80
  -2  -1 -11    2.40    1.90
  -2  -1 -11    5.40    4.30
   2  -1  11    4.00    5.00
   2   1  12   77.69    7.10
  -2   1 -12   68.39    8.40
  -2   1 -12   84.29    5.30
   2   1  12   49.40   22.50
  -2   1 -12   53.69   26.40
   2  -1  12  109.59   23.80
  -2  -1 -12   70.69    5.70
  -2  -1 -12   56.39   24.40
   2  -1  12   58.99    8.10
  -2  -1 -12   61.19    3.50
  -2  -1 -12   78.09    7.10
   2   1  13   25.00   24.10
  -2   1 -13   46.90    5.30
  -2   1 -13   11.10   27.80
   2   1  13   33.20    5.40
  -2   1 -13   39.00    6.00
   2  -1  13   40.60    6.40
  -2  -1 -13   61.39   25.70
  -2  -1 -13   35.60    4.20
  -2  -1 -13   30.00    2.10
   2  -1  13   17.30   21.20
  -2  -1 -13   43.60    5.60
   2   1  14   78.99   28.20
   2   1  14   50.99    7.20
  -2   1 -14   55.49    6.30
  -2   1 -14   60.39   32.60
  -2   1 -14   46.60    6.90
   2  -1  14   12.60   23.50
  -2  -1 -14    1.40   30.90
  -2  -1 -14   49.90    6.50
   2  -1  14   46.90    7.00
  -2  -1 -14   53.99    6.20
  -2   1 -15   10.40    6.60
   2   1  15    6.00    6.10
   2  -1  15    7.40    7.00
  -2  -1 -15    9.60    5.90
  -2  -1 -15    8.70    4.50
  -2   1 -16   84.69   11.20
  -2   1 -16   83.39    7.50
   2   1  16   86.89    9.90
  -2  -1 -16   84.69    9.30
   2  -1  16   71.19    8.50
  -2   1 -17   25.90    5.40
   2   1  17   24.70    7.10
  -2   1 -17   43.30    8.00
   2  -1  17   37.00    8.60
  -2  -1 -17   40.10    7.00
   2   1  18   25.20    7.60
  -2   1 -18   22.40    5.70
  -2  -1 -18   20.70    7.40
   2  -1  18   27.80    8.70
   2   1  19    0.80    7.80
  -2  -1 -19    8.30    7.40
   2  -1  19   -0.50    9.40
  -2  -2  19    6.40   10.10
   2  -2 -19   13.00    8.40
  -2   2  18   21.80    7.60
   2  -2 -18   18.60    7.50
  -2  -2  18    7.40    9.10
   2   2 -17   19.30    8.30
  -2   2  17   18.30    9.20
   2  -2 -17    3.80    7.00
  -2  -2  17   -2.90    8.70
  -2   2  16   45.20    5.70
   2   2 -16   50.09    8.00
  -2  -2  16   32.90    8.40
   2  -2 -16   42.00    7.00
  -2   2  15    5.00    4.80
   2   2 -15    7.40    3.00
   2   2 -15    8.20    7.10
   2   2 -15    8.50   58.39
  -2   2  15   22.60   23.80
   2  -2 -15   14.30    3.40
  -2  -2  15  -79.99   36.50
  -2  -2  15   12.70    7.50
   2  -2 -15   14.00    6.30
   2  -2 -15  -32.30   27.30
  -2   2  14   84.49    7.20
   2   2 -14   81.49    4.50
   2   2 -14   92.49   10.90
   2   2 -14   75.49   31.60
  -2   2  14   91.19   22.70
   2  -2 -14   40.70   25.20
   2  -2 -14   82.99    5.00
   2  -2 -14   89.89    8.70
  -2  -2  14  101.99   10.20
   2  -2 -14   85.69    4.90
   2   2 -13   67.89    9.00
   2   2 -13   78.99   26.60
   2   2 -13   71.19    4.10
  -2   2  13   88.49   19.70
  -2   2  13   84.29    6.30
   2  -2 -13   72.29    7.30
   2  -2 -13   71.99    4.70
   2  -2 -13   82.09    5.10
   2  -2 -13   79.89   23.10
  -2  -2  13   59.99   20.40
  -2  -2  13   82.49    9.30
  -2   2  12  234.88   25.50
   2   2 -12  224.48   10.70
   2   2 -12  216.98    6.50
  -2   2  12  210.48    8.10
   2   2 -12  230.88   32.90
   2  -2 -12  223.68    7.50
  -2  -2  12  218.08   10.40
   2  -2 -12  220.38    9.00
   2  -2 -12  223.18    7.00
  -2  -2  12  218.68   25.70
   2  -2 -12  223.18   25.80
   2   2 -11    0.90    1.90
  -2   2  11    1.00    3.10
   2   2 -11   -2.50    5.10
  -2   2  11   12.20   14.50
   2   2 -11    0.30   19.00
   2  -2 -11   -0.10   14.60
  -2  -2  11   -5.00    5.10
   2  -2 -11    3.40    2.80
  -2  -2  11   13.30   15.00
   2  -2 -11   -2.70    2.20
   2  -2 -11   -3.00    4.60
   2  -2 -11   -1.20    2.60
   2   2 -10   95.79    7.80
  -2   2  10  100.19    4.90
  -2   2  10   94.79   16.10
   2   2 -10   98.39   19.70
   2   2 -10  101.19    3.60
   2  -2 -10  101.19    4.20
  -2  -2  10  102.69    7.30
   2  -2 -10   95.59    4.00
  -2  -2  10  133.69   20.20
   2  -2 -10   96.29    6.00
   2  -2 -10  107.29   17.60
   2  -2 -10   97.69    5.10
  -2   2   9   19.40   11.50
   2   2  -9   11.80    1.60
   2   2  -9   15.40   15.70
  -2   2   9   14.90    2.50
   2   2  -9   12.30    4.60
  -2  -2   9    8.30    4.20
   2  -2  -9   12.30   12.70
  -2  -2   9    1.90   12.70
   2  -2  -9   12.40    2.50
   2  -2  -9    9.90    3.90
   2  -2  -9   13.10    1.80
   2  -2  -9    9.00    1.90
  -2   2   8   36.90    3.10
   2   2  -8   43.70    4.90
   2   2  -8   39.80   14.30
  -2   2   8   35.50   11.50
   2  -2  -8   42.00    2.50
   2  -2  -8   45.70    3.90
   2  -2  -8   36.90    3.60
   2  -2  -8   35.20    2.80
  -2  -2   8   30.20   15.00
   2  -2  -8   42.10   12.00
  -2  -2   8   37.20    4.20
   2   2  -7   -4.60    3.50
  -2   2   7    1.20    9.40
   2   2  -7   -1.90   12.40
  -2   2   7    1.00    1.60
   2  -2  -7    1.20    9.40
   2  -2  -7    1.10    1.40
   2  -2  -7    3.40    1.30
   2  -2  -7   -0.90    2.60
   2  -2  -7   -1.70    2.00
  -2  -2   7   -1.20    2.80
   2   2  -6  787.82   20.90
  -2   2   6  795.62   29.30
  -2   2   6  788.62   19.80
   2  -2  -6  790.72   19.40
  -2  -2   6  804.62   20.30
   2  -2  -6  796.22   20.10
  -2  -2   6  824.32   19.30
   2  -2  -6  786.62   19.20
   2  -2  -6  797.02   19.70
   2  -2  -6  787.22   28.70
   2   2  -5   30.90    3.50
  -2   2   5   26.20    8.90
  -2  -2   5   40.20    2.20
   2  -2  -5   31.10    2.70
  -2  -2   5   42.20   10.70
  -2  -2   5   23.90    2.60
   2  -2  -5   38.00    8.70
   2  -2  -5   30.80    2.80
   2   2  -4    1.30    2.60
  -2   2   4    4.90    7.00
  -2   2   4    8.50    1.20
   2  -2  -4    5.30    1.90
   2  -2  -4    2.70    1.70
   2  -2  -4   17.00    7.90
  -2  -2   4    7.50    1.40
  -2  -2   4    0.60    2.10
   2  -2  -4    7.70    1.20
  -2  -2   4    8.80    8.20
  -2   2   3  260.07    6.60
  -2   2   3  248.68   14.30
   2   2  -3  247.38    7.70
   2   2  -3  251.97   15.60
  -2  -2   3  256.87   15.90
  -2  -2   3  242.88    6.70
  -2  -2   3  234.78    7.00
   2  -2  -3  262.17    6.90
   2  -2  -3  251.57    6.60
   2  -2  -3  246.88   14.80
  -2   2   2  703.93   17.40
   2   2  -2  702.23   26.60
  -2   2   2  721.73   17.30
  -2   2   2  708.23   25.70
   2   2  -2  701.73   17.90
  -2  -2   2  707.73   17.40
  -2  -2   2  694.43   26.30
  -2  -2   2  686.93   17.30
   2  -2  -2  682.33   25.30
   2  -2  -2  691.13   17.30
   2  -2  -2  735.03   17.40
  -2   2   1 1215.08   29.40
   2   2  -1 1226.98   39.20
   2   2  -1 1187.88   29.60
  -2   2   1 1205.18   29.20
  -2  -2   1 1190.18   29.20
   2  -2  -1 1185.58   29.40
  -2  -2   1 1226.48   29.20
  -2  -2   1 1223.18   39.50
   2  -2  -1 1215.78   29.20
  -2  -2   1 1184.18   29.30
   2   2   0   29.40    2.50
  -2   2   0   27.50    2.10
  -2   2   0   29.90    2.70
   2   2   0   28.00    9.10
  -2  -2   0   28.30    1.90
  -2  -2   0   29.00    2.30
   2  -2   0   29.60    6.50
   2  -2   0   41.70    8.10
  -2  -2   0   24.80    8.40
   2  -2   0   32.40    2.20
  -2  -2   0   31.80    1.90
   2  -2   0   30.70    1.90
  -2   2  -1 1258.17   30.50
  -2   2  -1 1267.97   29.90
   2   2   1 1248.78   40.20
   2   2   1 1193.48   30.10
   2  -2   1 1283.57   30.10
   2  -2   1 1258.57   30.00
   2  -2   1 1230.18   38.30
  -2  -2  -1 1227.18   30.10
  -2  -2  -1 1249.97   40.30
  -2  -2  -1 1165.58   30.10
  -2  -2  -1 1254.17   30.20
  -2  -2  -1 1248.88   29.90
  -2   2  -2  939.11   31.60
  -2   2  -2  904.81   22.60
   2   2   2  868.91   21.90
   2   2   2  892.01   32.40
  -2   2  -2  918.51   21.80
   2   2   2  868.41   21.90
  -2  -2  -2  871.61   22.20
   2  -2   2  896.31   30.80
  -2  -2  -2  881.81   22.20
   2  -2   2  940.21   22.20
  -2  -2  -2  919.21   32.40
   2  -2   2  912.61   21.90
  -2   2  -3  873.11   31.50
   2   2   3  877.31   20.40
   2   2   3  809.42   30.80
   2   2   3  838.82   20.50
  -2   2  -3  853.01   20.50
  -2   2  -3  850.21   21.40
   2   2   3  824.82   20.50
   2  -2   3  854.81   20.50
  -2  -2  -3  826.12   31.00
  -2  -2  -3  841.82   20.90
  -2  -2  -3  829.42   21.00
   2  -2   3  845.12   31.20
   2  -2   3  826.92   20.90
   2   2   4   28.60    2.20
   2   2   4   33.70    2.10
  -2   2  -4   30.80    2.00
  -2   2  -4   32.50    3.90
   2   2   4   25.60    9.40
  -2   2  -4   31.70    9.70
  -2  -2  -4   30.60    2.70
   2  -2   4   33.80    9.60
   2  -2   4   30.60    2.20
   2  -2   4   22.20    2.40
  -2  -2  -4   26.50    2.30
  -2  -2  -4   25.00   10.80
   2   2   5  292.07    7.70
   2   2   5  287.67    7.60
  -2   2  -5  280.67   20.80
  -2   2  -5  296.27    7.60
   2   2   5  263.37   18.60
   2  -2   5  299.87    7.60
   2  -2   5  293.97   19.50
  -2  -2  -5  286.17    8.50
   2  -2   5  287.17    8.50
  -2  -2  -5  287.37    8.10
  -2  -2  -5  304.27    7.50
  -2  -2  -5  274.97   19.40
   2   2   6    3.30   11.20
  -2   2  -6    5.70    1.70
  -2   2  -6   -2.20    3.40
   2   2   6    3.00    1.70
   2   2   6    2.40    1.90
  -2   2  -6    4.60   10.80
   2  -2   6    2.60   10.10
  -2  -2  -6    5.10   12.10
  -2  -2  -6    2.30    1.40
   2  -2   6   -1.60    3.10
  -2  -2  -6   -2.20    2.00
   2  -2   6    2.10    1.50
  -2  -2  -6    4.30    2.90
  -2   2  -7    8.50   11.90
   2   2   7    4.00    1.90
   2   2   7   16.20   12.00
  -2   2  -7    6.40    1.90
  -2   2  -7   -5.60    3.70
   2   2   7    6.90    2.20
   2  -2   7    0.60    3.20
  -2  -2  -7   11.90   12.60
  -2  -2  -7    3.00    3.60
  -2  -2  -7    4.80    2.30
   2  -2   7   12.00   12.20
   2  -2   7    4.40    1.50
  -2  -2  -7    6.60    1.60
  -2   2  -8   29.30    4.80
   2   2   8   44.90   16.30
   2   2   8   32.60    3.40
   2   2   8   36.60    2.90
  -2   2  -8   14.70   16.20
  -2   2  -8   37.50    3.20
  -2  -2  -8   33.40    2.80
  -2  -2  -8   37.20    4.00
   2  -2   8   34.80    2.90
  -2  -2  -8   33.30    2.90
   2  -2   8   32.50    4.40
  -2  -2  -8   34.40   16.20
   2  -2   8   39.40   14.30
  -2   2  -9   43.10   18.80
  -2   2  -9   52.59    5.50
   2   2   9   64.39   16.60
  -2   2  -9   58.49    3.80
   2   2   9   54.49    4.60
   2   2   9   47.80    4.00
  -2  -2  -9   48.70    5.60
  -2  -2  -9   54.89    4.20
  -2  -2  -9   57.49    3.30
  -2  -2  -9   56.59   18.70
   2  -2   9   61.29   17.50
   2  -2   9   51.99    5.30
  -2   2 -10  131.19    9.40
   2   2  10  155.98   25.70
   2   2  10  140.59    6.10
  -2   2 -10  145.59    5.50
  -2   2 -10  165.98   26.00
   2  -2  10  133.49    8.30
  -2  -2 -10  130.99   22.30
  -2  -2 -10  135.19    5.00
  -2  -2 -10  143.99    5.70
  -2  -2 -10  162.28    8.20
   2  -2  10  217.08   26.50
   2   2  11   92.99   21.40
  -2   2 -11   51.19    4.50
  -2   2 -11   63.89   22.20
   2   2  11   52.39    5.40
  -2   2 -11   46.60    6.20
   2  -2  11   37.20    5.40
  -2  -2 -11   45.30    6.90
  -2  -2 -11   44.20   22.30
  -2  -2 -11   54.59    4.70
  -2  -2 -11   50.09    3.90
   2  -2  11   28.10   18.60
   2   2  12   76.79   20.80
  -2   2 -12  103.39   27.60
  -2   2 -12   61.49    7.10
  -2   2 -12   68.59    5.10
   2   2  12   56.89    6.50
   2  -2  12   59.29   21.30
  -2  -2 -12   60.69    4.30
   2  -2  12   65.39    6.70
  -2  -2 -12   57.49   25.90
  -2  -2 -12   79.39    8.40
  -2  -2 -12   70.29    4.80
  -2   2 -13  202.88   35.60
   2   2  13  198.88    8.60
   2   2  13  239.08   32.30
  -2   2 -13  216.08   12.00
  -2   2 -13  197.68    7.70
  -2  -2 -13  192.88    6.80
  -2  -2 -13  189.48    6.90
   2  -2  13  188.58   30.20
  -2  -2 -13  207.38   10.70
   2  -2  13  203.08   11.10
  -2  -2 -13  257.07   39.60
  -2   2 -14   24.20    4.10
   2   2  14   18.20    5.20
  -2   2 -14   28.00    7.10
  -2   2 -14   10.20   32.70
   2   2  14   80.39   28.00
   2  -2  14   30.20    7.40
  -2  -2 -14   13.90    2.80
  -2  -2 -14   22.10    3.20
  -2  -2 -14    9.00   30.00
   2  -2  14   54.09   26.40
  -2  -2 -14   24.90    6.70
   2   2  15   12.10    5.60
  -2   2 -15    4.20    4.30
  -2   2 -15   16.30    7.40
  -2  -2 -15   15.70    6.90
   2  -2  15    1.80    7.50
  -2   2 -16    7.70    4.70
   2   2  16   15.50    5.90
  -2   2 -16   23.00    8.30
  -2  -2 -16   28.90    7.40
   2  -2  16    9.60    8.50
  -2   2 -17   14.80    5.90
   2   2  17   18.30    6.30
   2  -2  17   18.40    8.90
  -2  -2 -17   26.00    7.90
   2   2  18   -3.20    8.40
  -2  -2 -18   11.90    8.10
   2  -2  18   12.20    9.50
   2  -2  19    5.10   10.00
  -2  -2 -19   10.40    8.50
   2  -3 -19    7.70    9.00
  -2  -3  19   11.40   10.90
  -2  -3  18   13.30   10.20
   2  -3 -18   -1.10    8.30
   2  -3 -17    0.40    7.70
  -2  -3  17   10.10    9.70
   2  -3 -16   21.90    7.70
  -2  -3  16   31.00    8.90
  -2   3  15   35.70    4.00
   2   3 -15   33.90    8.40
   2  -3 -15   27.90    7.40
  -2  -3  15   38.80    8.70
   2  -3 -15   31.10    4.10
  -2   3  14   80.69    5.50
  -2   3  14   63.99   25.90
   2   3 -14   71.59    8.70
  -2  -3  14  149.99   27.50
   2  -3 -14   99.79   28.10
  -2  -3  14   78.09    8.70
   2  -3 -14   81.29    6.70
   2  -3 -14   79.99    7.70
  -2   3  13   56.09    4.70
  -2   3  13   81.89   22.10
   2   3 -13   50.09    7.30
   2  -3 -13    8.40   22.80
   2  -3 -13   49.50    6.90
  -2  -3  13   47.10    7.70
   2  -3 -13   60.79    6.20
  -2  -3  13   64.49   28.90
  -2   3  12   70.69   20.00
   2   3 -12   45.90    7.00
  -2   3  12   64.29    4.30
   2  -3 -12   65.29    6.20
   2  -3 -12   56.49   20.40
  -2  -3  12   49.20    7.00
   2  -3 -12   60.49    6.50
  -2   3  11  242.38   27.10
  -2   3  11  245.48    7.20
   2   3 -11  264.37   11.90
  -2  -3  11  229.48   10.00
   2  -3 -11  253.57    8.60
   2  -3 -11  268.27   29.70
  -2   3  10   99.09    3.90
   2   3 -10   72.59    8.80
  -2   3  10  119.29   19.10
   2  -3 -10  101.59    5.80
   2  -3 -10  106.69   19.30
   2  -3 -10   87.79    6.70
  -2  -3  10   76.29    8.60
  -2   3   9  749.42   18.70
   2   3  -9  786.22   21.70
  -2   3   9  743.33   35.60
   2  -3  -9  772.42   19.70
  -2  -3   9  793.62   18.70
   2  -3  -9  755.42   35.70
  -2  -3   9  749.62   20.50
   2  -3  -9  764.92   20.60
  -2   3   8   20.10   13.10
   2   3  -8    0.20    4.50
   2  -3  -8   -4.20    3.50
   2  -3  -8    2.90    2.80
  -2  -3   8   -2.60    3.70
  -2  -3   8    4.20    1.70
   2  -3  -8   -0.20   12.80
   2   3  -7  934.61   24.70
  -2   3   7  909.61   37.80
  -2  -3   7  916.01   22.60
  -2  -3   7  924.71   23.70
   2  -3  -7  937.91   36.70
   2  -3  -7  924.61   23.60
   2  -3  -7  916.91   23.20
  -2  -3   7  914.51   41.70
  -2   3   6   50.99   13.10
   2   3  -6   26.60    4.10
   2  -3  -6   43.40    3.80
  -2  -3   6   29.50    3.10
  -2  -3   6   39.80   13.20
   2  -3  -6   36.40   11.90
   2  -3  -6   38.10    4.00
  -2  -3   6   26.60    3.30
  -2  -3   6   66.69   15.10
  -2   3   5 1397.76   33.40
  -2   3   5 1387.96   47.80
   2   3  -5 1383.96   35.10
   2  -3  -5 1408.86   33.50
   2  -3  -5 1416.76   34.10
   2  -3  -5 1433.86   46.80
   2  -3  -5 1364.96   34.10
  -2  -3   5 1390.26   34.20
  -2  -3   5 1389.56   50.09
  -2  -3   5 1384.06   33.80
  -2  -3   5 1312.07   48.20
  -2   3   4  161.78    4.80
   2   3  -4  146.19    6.60
  -2   3   4  141.49   16.50
  -2  -3   4  153.58    5.50
   2  -3  -4  174.78   17.40
  -2  -3   4  155.78    5.20
   2  -3  -4  153.88    4.90
  -2  -3   4  188.78   18.10
   2  -3  -4  149.59    5.40
   2  -3  -4  162.28    5.70
  -2   3   3 1599.94   38.80
   2   3  -3 1606.14   53.19
   2   3  -3 1573.94   39.70
  -2  -3   3 1615.34   39.00
  -2  -3   3 1597.84   39.00
   2  -3  -3 1577.74   39.00
  -2  -3   3 1645.24   53.99
   2  -3  -3 1589.64   39.10
   2  -3  -3 1621.64   52.19
   2  -3  -3 1619.64   39.00
   2   3  -2  151.68   17.80
  -2   3   2  143.39    5.10
   2   3  -2  132.79    7.20
   2  -3  -2  154.48    4.40
  -2  -3   2  139.39    5.20
   2  -3  -2  146.49   17.40
  -2  -3   2  139.29    4.70
   2  -3  -2  138.49    4.90
  -2  -3   2  142.19    4.40
  -2  -3   2  158.88   18.20
  -2   3   1  752.72   19.20
   2   3  -1  788.42   33.00
  -2   3   1  776.02   19.60
   2   3  -1  755.92   19.80
  -2  -3   1  788.22   19.60
   2  -3  -1  773.02   19.30
  -2  -3   1  790.42   19.10
   2  -3  -1  794.22   19.00
  -2  -3   1  769.22   33.30
  -2  -3   1  772.72   19.20
   2  -3  -1  770.52   31.60
   2   3   0 1306.37   33.80
   2   3   0 1357.06   47.80
  -2   3   0 1355.66   33.30
  -2   3   0 1368.86   33.80
  -2   3   0 1357.86   45.00
  -2  -3   0 1394.46   33.40
  -2  -3   0 1385.36   48.10
   2  -3   0 1432.06   33.30
  -2  -3   0 1379.66   33.20
   2  -3   0 1394.76   46.20
   2  -3   0 1385.06   33.50
  -2  -3   0 1361.36   33.70
   2   3   1   61.19    3.90
   2   3   1   66.59   13.30
  -2   3  -1   63.09    3.10
  -2   3  -1   59.69    4.50
  -2  -3  -1   74.99   14.10
  -2  -3  -1   67.49    2.90
   2  -3   1   77.59   12.40
   2  -3   1   65.89    3.50
   2  -3   1   77.69   13.10
   2  -3   1   62.39    3.20
  -2  -3  -1   59.09    3.80
  -2  -3  -1   62.69    3.40
  -2   3  -2 1059.49   25.30
  -2   3  -2 1041.00   26.30
   2   3   2  999.00   39.50
   2   3   2 1027.00   25.60
   2  -3   2 1041.50   25.50
  -2  -3  -2 1024.70   39.90
   2  -3   2 1078.89   25.70
  -2  -3  -2 1039.40   25.90
   2  -3   2 1036.40   37.70
  -2  -3  -2 1040.90   25.80
  -2  -3  -2 1033.90   25.10
   2  -3   2 1028.30   38.00
   2   3   3  124.09    4.50
  -2   3  -3  129.19    6.40
   2   3   3  137.69    4.70
  -2   3  -3  137.09    4.20
   2   3   3  132.89   16.90
  -2  -3  -3  139.79    5.70
   2  -3   3  134.69    4.90
   2  -3   3  139.69    5.30
  -2  -3  -3  127.79   19.40
  -2  -3  -3  128.29    5.30
   2  -3   3  129.79   15.50
  -2   3  -4 1355.96   35.00
  -2   3  -4 1376.46   49.00
   2   3   4 1381.36   49.50
   2   3   4 1387.16   33.80
   2   3   4 1404.66   33.70
  -2   3  -4 1378.56   33.80
   2   3   4 1346.57   33.90
  -2  -3  -4 1419.46   50.29
   2  -3   4 1452.25   34.10
  -2  -3  -4 1405.26   34.50
   2  -3   4 1452.65   49.50
  -2  -3  -4 1438.46   34.70
   2  -3   4 1414.36   34.50
  -2   3  -5   19.70   14.00
  -2   3  -5   -2.40    3.70
   2   3   5    2.50   13.00
  -2  -3  -5   23.10   12.90
  -2  -3  -5    2.20    3.10
  -2  -3  -5    3.20    2.80
   2  -3   5  -14.40   12.00
   2  -3   5    2.10    2.90
  -2   3  -6 1013.70   42.50
   2   3   6 1084.39   43.90
   2   3   6 1070.89   26.20
  -2   3  -6 1076.09   26.30
  -2   3  -6 1067.59   28.10
  -2  -3  -6 1106.19   27.50
  -2  -3  -6 1105.19   27.10
   2  -3   6 1099.79   26.50
   2  -3   6 1098.49   27.40
  -2  -3  -6 1105.59   44.60
   2  -3   6 1045.80   42.40
  -2   3  -7   26.90   17.50
  -2   3  -7   36.00    2.90
   2   3   7   38.70   15.10
   2   3   7   42.40    3.10
  -2   3  -7   46.70    5.30
  -2  -3  -7   38.10    4.30
   2  -3   7   45.30    4.80
   2  -3   7   40.30    3.40
  -2  -3  -7   50.19    5.20
   2  -3   7   59.79   16.50
  -2  -3  -7   31.90   17.30
  -2   3  -8  487.15   12.60
   2   3   8  481.95   30.50
  -2   3  -8  429.66   33.60
   2   3   8  494.25   12.70
  -2   3  -8  498.65   15.40
  -2  -3  -8  491.05   14.20
   2  -3   8  514.25   12.70
  -2  -3  -8  496.85   33.90
   2  -3   8  482.85   30.60
   2  -3   8  494.85   14.60
  -2  -3  -8  506.35   13.70
   2   3   9   23.90   18.60
  -2   3  -9   18.80   18.60
   2   3   9   17.40    2.70
  -2   3  -9    9.60    5.50
  -2   3  -9   11.40    2.50
   2  -3   9   14.60    2.10
  -2  -3  -9    1.00   16.90
  -2  -3  -9   12.20    4.60
  -2  -3  -9   17.40    3.50
   2  -3   9    6.90    5.10
   2  -3   9   14.30   18.10
  -2   3 -10  219.08   33.00
   2   3  10  188.28    6.50
  -2   3 -10  184.28    6.20
   2   3  10  187.18   29.10
  -2   3 -10  184.38   10.50
  -2  -3 -10  163.28   25.00
   2  -3  10  154.98   25.00
   2  -3  10  168.88    8.80
  -2  -3 -10  189.08    7.60
  -2  -3 -10  181.18   10.40
   2   3  11   51.79   22.70
   2   3  11   33.00    3.60
  -2   3 -11   31.90    3.20
  -2   3 -11   18.60   25.60
  -2   3 -11   25.10    6.70
  -2  -3 -11   30.30    6.30
   2  -3  11   20.20   22.10
  -2  -3 -11   27.90    3.90
  -2  -3 -11   28.00   21.80
   2  -3  11   23.10    5.70
  -2   3 -12  163.48   33.40
   2   3  12  160.38    6.90
   2   3  12  139.29   25.10
  -2   3 -12  139.29    6.20
  -2   3 -12  162.68   11.30
  -2  -3 -12  164.98    7.40
  -2  -3 -12  182.98   32.40
   2  -3  12  226.88   34.70
   2  -3  12  142.59    9.30
  -2  -3 -12  169.68   10.50
   2   3  13   37.20    4.40
  -2   3 -13   39.20    3.80
   2   3  13   47.00   25.50
  -2   3 -13   39.50    8.00
  -2   3 -13   20.60   32.20
  -2  -3 -13   45.20    7.50
   2  -3  13   30.80    7.30
  -2  -3 -13    1.30   28.90
  -2  -3 -13   42.00    4.20
   2  -3  13   52.89   28.00
  -2   3 -14   50.19    4.30
  -2   3 -14   55.99    8.70
   2   3  14   50.49    4.80
  -2  -3 -14   49.00    4.30
   2  -3  14   65.39    8.30
  -2  -3 -14   62.99    8.00
   2   3  15   18.40    4.80
  -2   3 -15    9.80    4.00
  -2   3 -15   20.10   11.60
  -2  -3 -15   23.40    8.20
   2  -3  15   25.60    8.60
  -2  -3 -15   16.80    4.10
  -2  -3 -16   -7.80    8.20
   2  -3  16    9.00    9.10
  -2  -3 -17   31.90    8.70
   2  -3  17   43.10   10.10
   2  -3  18   -0.10    9.70
  -2  -3 -18    4.30    8.60
   2  -4 -18   10.00    9.30
  -2  -4  18   11.10   10.90
  -2  -4  17   21.90   11.00
   2  -4 -17   38.80    8.20
   2  -4 -16   52.39    8.20
   2  -4 -16   44.30    8.60
  -2  -4  16   50.69   10.40
   2  -4 -15    2.30    7.80
  -2  -4  15    5.00    8.80
   2  -4 -15   13.00    5.10
   2  -4 -14  163.78    8.70
   2  -4 -14  170.38   11.80
  -2  -4  14  163.78   12.80
  -2   4  13   28.20   25.30
   2   4 -13    1.80    7.90
   2  -4 -13    5.70    6.90
   2  -4 -13  -16.00   26.70
  -2  -4  13    9.40    7.70
   2  -4 -13   13.00    4.70
  -2   4  12  202.38   33.20
   2   4 -12  175.38   12.50
   2  -4 -12  194.18    8.70
   2  -4 -12  189.68   28.20
   2  -4 -12  168.38    9.80
  -2  -4  12  122.09   27.90
  -2  -4  12  181.78   11.60
   2   4 -11   16.30    7.00
  -2   4  11   30.20   20.00
   2  -4 -11   29.00    4.40
  -2  -4  11   17.30    6.60
   2  -4 -11   16.20    5.50
   2  -4 -11   46.80   20.90
  -2  -4  11   32.70   21.90
  -2  -4  11   21.10    2.40
  -2   4  10  267.47   28.30
   2   4 -10  250.77   12.70
   2  -4 -10  250.47   10.10
   2  -4 -10  284.17   32.20
  -2  -4  10  278.57   32.20
   2  -4 -10  259.57    9.60
  -2  -4  10  268.17   11.40
  -2  -4  10  253.57    7.40
   2   4  -9   70.89    9.40
  -2   4   9   80.19   19.70
  -2  -4   9   56.19    6.90
  -2  -4   9   72.29   22.00
   2  -4  -9   83.89    6.10
   2  -4  -9   75.69   21.00
   2  -4  -9   68.99    9.60
  -2  -4   9   73.99    4.20
  -2   4   8  166.38   25.70
   2   4  -8  209.38   10.80
  -2  -4   8  201.08    6.70
   2  -4  -8  215.48    8.00
   2  -4  -8  196.88    8.30
  -2  -4   8  198.38    8.50
   2  -4  -8  218.58   24.80
  -2  -4   8  281.67   29.20
   2   4  -7   78.69    8.70
  -2   4   7  108.19   19.50
   2  -4  -7  121.09   19.60
  -2  -4   7   95.09    7.00
   2  -4  -7  111.09    6.10
  -2  -4   7   92.29    4.80
  -2  -4   7  113.49   19.50
   2  -4  -7   89.59    6.00
   2   4  -6   53.19    5.80
  -2   4   6   51.29    2.90
  -2   4   6   29.50   15.80
  -2  -4   6   45.60    5.20
   2  -4  -6   48.60    4.20
  -2  -4   6   39.00   18.00
  -2  -4   6   39.70   18.80
   2  -4  -6   56.09   17.60
   2  -4  -6   45.50    2.90
   2  -4  -6   35.60    3.60
  -2  -4   6   46.20    4.40
  -2   4   5  204.18   25.10
  -2   4   5  251.47    7.20
   2   4  -5  252.17   10.20
   2  -4  -5  251.77   25.30
  -2  -4   5  274.47   23.80
  -2  -4   5  257.67    8.60
  -2  -4   5  245.28   25.80
  -2  -4   5  248.88    7.80
   2  -4  -5  253.97    7.30
   2  -4  -5  252.87    8.50
   2  -4  -5  237.48    8.20
   2   4  -4   16.00   13.70
   2   4  -4    1.20    3.70
  -2   4   4   -2.10    2.40
  -2  -4   4   -3.20    2.80
   2  -4  -4   -4.80   24.40
  -2  -4   4   -0.70    2.80
   2  -4  -4   -4.60    3.10
  -2  -4   4   -2.10    1.70
   2  -4  -4   -0.30    2.90
  -2  -4   4   13.70   17.30
   2   4  -3  118.79   19.60
   2   4  -3  118.89    7.20
  -2   4   3  126.29    5.40
  -2  -4   3  129.39    4.50
   2  -4  -3  133.89    5.70
  -2  -4   3  152.18   21.60
  -2  -4   3  120.49    5.50
   2  -4  -3  113.89    5.40
   2  -4  -3  113.89   18.10
  -2  -4   3  125.69    5.70
   2   4  -2  116.09    6.60
   2   4  -2  132.49   21.70
  -2   4   2  116.59    5.40
  -2   4   2  119.29   19.10
   2  -4  -2  106.29   17.80
  -2  -4   2  124.79   19.30
  -2  -4   2  112.59    4.50
   2  -4  -2  116.59    3.90
   2  -4  -2  120.19    5.20
  -2  -4   2  117.29    4.90
   2  -4  -2  107.79    5.60
  -2  -4   2  107.59    5.30
   2   4  -1  399.26   12.00
   2   4  -1  424.96   29.60
  -2   4   1  365.46   12.50
  -2   4   1  392.96   24.80
   2  -4  -1  382.46   25.50
  -2  -4   1  417.06   10.90
  -2  -4   1  413.46   27.50
   2  -4  -1  406.06   11.20
  -2  -4   1  403.06   11.40
  -2  -4   1  416.96   10.90
   2  -4  -1  428.86   10.50
  -2   4   0 1166.68   29.40
  -2   4   0 1176.38   28.60
   2   4   0 1046.40   29.80
  -2   4   0 1170.18   44.40
   2   4   0 1206.88   47.70
  -2  -4   0 1174.88   48.00
   2  -4   0 1186.28   28.50
  -2  -4   0 1169.48   28.70
   2  -4   0 1185.78   28.90
  -2  -4   0 1174.08   28.50
  -2  -4   0 1153.08   29.10
   2  -4   0 1159.28   44.90
   2   4   1    6.90    3.10
  -2   4  -1   11.70    2.50
  -2   4  -1    6.20    3.40
   2   4   1   10.80   13.30
  -2  -4  -1  -18.80   12.60
   2  -4   1    5.60    2.60
  -2  -4  -1    7.50    3.00
  -2  -4  -1   13.20    2.00
   2  -4   1    8.60   13.90
   2  -4   1   11.00    2.60
  -2  -4  -1    9.70    2.70
  -2   4  -2  245.28    9.20
   2   4   2  249.18   23.40
   2   4   2  254.57    8.10
  -2   4  -2  263.47    7.30
   2  -4   2  262.07   22.70
  -2  -4  -2  264.17   24.60
  -2  -4  -2  257.47    8.80
  -2  -4  -2  260.47    7.00
  -2  -4  -2  260.67    8.00
   2  -4   2  250.37   20.70
   2  -4   2  253.67    7.90
   2  -4   2  250.27    7.70
  -2   4  -3  126.19    7.40
   2   4   3  110.89   19.30
   2   4   3  115.69    5.30
  -2   4  -3  126.29    4.70
   2  -4   3  134.49   20.00
  -2  -4  -3  119.59    6.00
  -2  -4  -3  117.09   20.10
   2  -4   3  129.09    5.40
   2  -4   3  144.49   19.20
  -2  -4  -3  120.59    6.30
   2  -4   3  121.79    5.70
  -2  -4  -3  127.49    4.00
   2   4   4  467.15   11.80
   2   4   4  458.75   31.80
   2   4   4  471.15   12.60
  -2   4  -4  487.95   12.20
  -2   4  -4  458.45   14.40
  -2  -4  -4  475.95   13.30
   2  -4   4  499.05   31.70
  -2  -4  -4  471.45   13.60
   2  -4   4  490.05   12.80
   2  -4   4  474.65   28.20
   2  -4   4  472.95   13.30
  -2  -4  -4  471.05   30.90
   2   4   5  174.08   22.60
  -2   4  -5  158.08    5.10
   2   4   5  152.18    5.10
  -2   4  -5  142.89    8.60
   2   4   5  155.28    5.30
   2  -4   5  174.98   23.50
   2  -4   5  162.98    6.10
  -2  -4  -5  150.08    7.20
   2  -4   5  171.18   24.80
  -2  -4  -5  183.98   23.80
   2  -4   5  140.49    6.50
  -2  -4  -5  150.28    6.90
   2   4   6   31.40    2.70
   2   4   6   23.60   18.20
  -2   4  -6   32.50    3.30
  -2   4  -6   38.00    5.80
  -2  -4  -6   19.90   19.50
   2  -4   6   30.10    4.10
  -2  -4  -6   33.20    4.50
   2  -4   6   30.50    3.10
  -2  -4  -6   33.20    4.30
   2  -4   6   63.69   17.10
  -2   4  -7   -3.90    4.80
   2   4   7    8.30   16.40
  -2   4  -7    2.80    2.20
   2  -4   7   -2.10    4.70
   2  -4   7    1.90    2.70
  -2  -4  -7   -3.90    4.80
   2  -4   7   33.20   16.60
  -2  -4  -7    6.30   17.20
  -2  -4  -7   -0.60    3.90
  -2   4  -8   23.70   19.10
   2   4   8   27.90    3.10
  -2   4  -8   23.40    6.10
  -2   4  -8   32.00    2.60
   2   4   8   62.39   19.00
  -2  -4  -8   27.20    6.30
   2  -4   8   30.30    3.10
  -2  -4  -8   26.40    4.40
  -2  -4  -8    3.20   22.10
   2  -4   8   21.70    8.40
   2  -4   8    4.10   17.60
  -2   4  -9   59.99   22.20
  -2   4  -9   32.40    2.80
  -2   4  -9   25.70    6.50
   2   4   9   35.20    3.30
   2   4   9   26.90   21.50
  -2  -4  -9   16.00   23.40
  -2  -4  -9   29.40    5.50
   2  -4   9   42.00   19.90
   2  -4   9   17.90    5.80
  -2  -4  -9   33.90    4.50
   2  -4   9   33.90    3.00
  -2   4 -10   45.10    7.10
  -2   4 -10   62.59   26.90
  -2   4 -10   40.60    3.90
   2   4  10   48.20    3.70
   2   4  10   38.80   21.30
  -2  -4 -10   47.70    4.80
  -2  -4 -10   46.80    6.20
  -2  -4 -10   36.60   26.10
   2  -4  10   65.09   24.00
   2  -4  10   52.79    4.20
   2  -4  10   40.00    6.70
  -2   4 -11   11.70    2.80
   2   4  11   19.00    3.00
   2   4  11   18.50   24.70
  -2   4 -11   31.60   26.70
  -2   4 -11    8.90    7.20
  -2  -4 -11   57.89   28.50
  -2  -4 -11   12.60    6.00
   2  -4  11   22.10    6.80
   2  -4  11   21.80    2.50
  -2  -4 -11    8.90    4.50
   2  -4  11   28.70   25.90
  -2   4 -12   -6.80   32.80
   2   4  12   13.10    2.80
  -2   4 -12    7.20    3.00
   2   4  12   34.70   29.00
  -2   4 -12    7.40    7.70
   2  -4  12    5.00    6.40
  -2  -4 -12   12.10    4.70
  -2  -4 -12   23.80   32.50
  -2  -4 -12   17.10    7.10
  -2   4 -13   16.40    3.20
   2   4  13   23.30    4.90
  -2   4 -13   14.90    8.80
  -2   4 -13   14.30   37.30
  -2  -4 -13   15.60    4.90
   2  -4  13   12.70    7.90
  -2  -4 -13   24.60    7.80
   2  -4  13   21.30   27.80
   2  -4  14    6.20    8.80
  -2  -4 -14   -5.00    4.70
  -2  -4 -14    3.80    8.10
   2  -4  15   34.30    9.50
  -2  -4 -15   36.70    9.00
  -2  -4 -15   32.90    5.20
  -2  -4 -16   -4.30    8.80
   2  -4  16  -11.10    8.60
   2  -4  17    4.10   10.00
  -2  -4 -17   -3.70    8.50
   2  -4  18   14.60   17.50
  -2  -4 -18    6.80   10.00
   2  -5 -18    1.90   10.30
   2  -5 -17    6.00    9.80
  -2  -5  17   12.20   11.50
   2  -5 -16    4.00    5.90
  -2  -5  16   -9.30   10.30
   2  -5 -16   -0.70    8.20
   2  -5 -15   38.40    6.30
  -2  -5  15   30.30   10.00
   2  -5 -15   34.50    8.90
   2  -5 -14   10.60    8.30
  -2  -5  14    0.30    9.10
   2  -5 -14   14.20    5.70
   2  -5 -13   66.99    6.30
   2  -5 -13   58.49    7.80
  -2  -5  13   79.49    9.60
   2   5 -12   22.40   11.10
  -2   5  12   10.00   27.90
   2  -5 -12   46.20   29.50
  -2  -5  12   19.70    8.10
  -2  -5  12   10.50    3.70
   2  -5 -12   19.20    5.50
   2  -5 -12   15.00    7.50
  -2  -5  12   27.90   29.60
   2   5 -11   98.99   12.60
  -2   5  11  134.19   26.90
   2  -5 -11   67.39   28.70
  -2  -5  11   98.69   10.70
   2  -5 -11   87.99   10.00
   2  -5 -11   89.79    8.00
  -2  -5  11   93.19   30.00
  -2  -5  11   88.69    5.10
   2   5 -10   87.29   11.50
  -2   5  10  102.09   24.40
   2  -5 -10  131.29   28.00
  -2  -5  10   70.49    7.10
   2  -5 -10   72.29    8.10
  -2  -5  10  118.89   28.50
  -2  -5  10   68.39    5.20
   2  -5 -10   89.99    9.80
   2   5  -9   58.49    7.60
  -2   5   9   84.49   24.20
  -2  -5   9   50.49    3.90
  -2  -5   9   50.49    6.90
   2  -5  -9   50.69   23.30
   2  -5  -9   41.60    5.80
  -2  -5   9   44.60   24.10
   2  -5  -9   59.69    5.40
   2   5  -8   71.39    7.50
  -2   5   8   74.49   22.90
   2  -5  -8   77.59   23.70
   2  -5  -8   72.59    7.00
  -2  -5   8   70.59    5.50
   2  -5  -8   74.09    6.30
  -2  -5   8   69.69   21.70
  -2  -5   8   69.49    6.20
  -2   5   7   76.89   22.80
   2   5  -7   65.09    7.20
  -2  -5   7   50.29    5.70
   2  -5  -7   63.59    6.80
  -2  -5   7   58.49    6.00
   2  -5  -7   63.89   23.50
  -2  -5   7   62.69   20.50
   2   5  -6  264.67   12.10
  -2   5   6  273.37    7.90
   2  -5  -6  258.27    9.50
  -2  -5   6  273.37    9.30
   2  -5  -6  266.37    9.90
   2  -5  -6  297.27   32.30
  -2  -5   6  323.87   29.80
  -2  -5   6  259.37    9.50
  -2   5   5   50.59    4.60
   2   5  -5   51.69    6.40
  -2  -5   5   42.70   22.60
   2  -5  -5   46.20    4.60
  -2  -5   5   62.09   18.80
  -2  -5   5   45.60    3.40
  -2  -5   5   49.90    4.40
   2  -5  -5   47.50   21.10
  -2  -5   5   47.10    4.70
   2  -5  -5   50.59    4.80
   2   5  -4  123.49    8.90
  -2   5   4  113.69   28.30
  -2   5   4  132.79    6.10
   2   5  -4  161.08   26.10
   2  -5  -4  125.89    6.30
   2  -5  -4  119.59    6.40
  -2  -5   4  125.69    6.70
   2  -5  -4  132.19   22.30
  -2  -5   4  115.39    6.80
  -2  -5   4  125.69    4.90
  -2  -5   4  133.39   24.20
   2   5  -3  268.97   10.90
   2   5  -3  289.97   28.10
  -2   5   3  237.08   28.80
   2  -5  -3  266.77    8.70
  -2  -5   3  250.37   28.80
  -2  -5   3  256.97    9.00
  -2  -5   3  262.17    8.00
   2  -5  -3  250.37   30.20
   2  -5  -3  269.97    9.50
   2  -5  -3  274.17    7.20
  -2  -5   3  285.87    8.70
   2   5  -2   -0.10    4.60
  -2   5   2    0.50    3.70
   2   5  -2  -13.10   17.00
  -2   5   2    0.70   15.20
   2  -5  -2    0.60    3.20
  -2  -5   2   -3.20    3.40
   2  -5  -2   -1.20    3.80
   2  -5  -2    1.00    1.90
  -2  -5   2   -1.30    3.10
  -2  -5   2   -7.70   17.10
   2  -5  -2   11.40   17.80
  -2  -5   2   -7.40    2.80
  -2   5   1  254.67    9.10
  -2   5   1  249.48   25.30
   2   5  -1  233.18   27.00
   2   5  -1  246.28   10.10
  -2  -5   1  261.87   31.40
  -2  -5   1  251.37    8.20
   2  -5  -1  246.18    8.30
   2  -5  -1  258.07    9.10
  -2  -5   1  254.77    8.00
   2  -5  -1  272.57   29.00
   2  -5  -1  262.27    7.40
  -2  -5   1  242.28    9.30
   2   5   0   -4.70   19.30
   2   5   0   -3.00    4.00
  -2   5   0   17.60   15.80
  -2   5   0   -6.00    4.10
   2  -5   0   -1.90   17.00
  -2  -5   0  -11.20   16.50
   2  -5   0   -0.60    2.50
  -2  -5   0   -9.30    3.20
   2  -5   0   -7.10    3.20
  -2  -5   0   -0.90    3.60
  -2  -5   0   -2.70    2.60
  -2   5  -1  214.88    9.50
   2   5   1  199.58    8.50
   2   5   1  186.58   29.20
  -2  -5  -1  211.38    8.70
   2  -5   1  213.48    7.00
   2  -5   1  210.98   28.80
   2  -5   1  203.08    7.50
  -2  -5  -1  202.78    6.50
  -2  -5  -1  207.78    7.70
  -2  -5  -1  239.88   28.40
   2   5   2  169.58    7.80
  -2   5  -2  194.38    6.80
  -2   5  -2  179.58    9.00
   2   5   2  160.48   26.00
   2  -5   2  146.69   22.50
   2  -5   2  186.08    7.20
  -2  -5  -2  183.08    7.20
  -2  -5  -2  176.78    8.40
   2  -5   2  202.58   25.10
   2  -5   2  184.38    7.00
  -2  -5  -2  185.18    5.80
  -2  -5  -2  220.78   27.80
  -2   5  -3  327.27    9.10
   2   5   3  335.97   33.10
  -2   5  -3  310.87   11.70
   2   5   3  312.27   10.00
  -2  -5  -3  310.47   11.00
   2  -5   3  286.57   27.20
  -2  -5  -3  317.77   31.20
  -2  -5  -3  328.37   10.70
   2  -5   3  315.97    9.90
   2  -5   3  331.27   10.10
   2  -5   3  294.47   32.40
  -2  -5  -3  302.17    8.40
   2   5   4  496.75   36.60
   2   5   4  461.95   13.20
  -2   5  -4  465.95   15.40
  -2   5  -4  474.45   12.60
   2  -5   4  476.25   13.50
   2  -5   4  478.05   13.70
   2  -5   4  471.35   34.70
  -2  -5  -4  500.05   39.50
  -2  -5  -4  472.45   14.30
  -2  -5  -4  466.05   14.40
   2  -5   4  509.95   35.30
   2   5   5  658.33   17.10
  -2   5  -5  655.13   19.70
   2   5   5  633.04   39.20
  -2   5  -5  677.63   16.80
   2  -5   5  657.63   40.20
   2  -5   5  674.73   17.70
  -2  -5  -5  639.34   18.20
  -2  -5  -5  615.24   40.60
  -2  -5  -5  665.43   18.50
   2  -5   5  658.03   38.10
   2  -5   5  669.53   18.20
   2   5   6  323.67    9.20
   2   5   6  348.97   33.80
  -2   5  -6  340.17   13.50
   2   5   6  335.97    9.40
  -2   5  -6  338.57    9.50
   2  -5   6  342.17   10.70
   2  -5   6  378.66   31.70
  -2  -5  -6  362.16   33.90
   2  -5   6  357.86   11.90
   2  -5   6  377.16   39.80
  -2  -5  -6  338.77   11.40
  -2  -5  -6  347.37   12.30
   2   5   7  510.05   39.00
  -2   5  -7  504.65   16.90
  -2   5  -7  490.85   12.90
   2  -5   7  479.85   45.60
   2  -5   7  480.55   15.40
  -2  -5  -7  485.95   15.00
   2  -5   7  499.25   13.90
   2  -5   7  490.55   36.00
  -2  -5  -7  491.05   15.00
  -2  -5  -7  513.95   39.30
   2   5   8  189.68   28.80
  -2   5  -8  166.18    5.80
  -2   5  -8  161.48   11.40
  -2  -5  -8  154.38    9.00
   2  -5   8  210.58   29.90
  -2  -5  -8  180.38   31.70
  -2  -5  -8  169.08    8.90
   2  -5   8  165.58    7.30
   2  -5   8  162.48    9.80
   2   5   9  274.67   36.80
  -2   5  -9  256.07   13.30
  -2   5  -9  239.78    7.50
  -2  -5  -9  252.67   11.80
   2  -5   9  247.78    8.50
   2  -5   9  257.77   37.60
  -2  -5  -9  198.28   32.60
   2  -5   9  238.58   11.60
   2   5  10  107.19   30.50
  -2   5 -10   96.49   12.00
  -2   5 -10   90.29    4.80
  -2  -5 -10   85.69    8.30
   2  -5  10   93.99    6.10
   2  -5  10   90.69    8.00
  -2  -5 -10  121.89   33.50
   2  -5  10   35.40   25.10
  -2  -5 -10   99.19    9.00
   2   5  11  194.68   34.90
  -2   5 -11  175.08    6.30
  -2   5 -11  170.98   13.60
  -2  -5 -11  173.98   37.80
   2  -5  11  185.48    7.20
   2  -5  11  166.18   10.60
  -2  -5 -11  160.68   10.10
   2  -5  11  232.68   35.50
  -2  -5 -11  173.98   10.60
  -2   5 -12   14.60    3.60
   2  -5  12   11.40    8.20
  -2  -5 -12   16.40    7.00
   2  -5  12   47.00   34.00
  -2  -5 -12   18.10    5.50
  -2  -5 -13   66.89    6.50
   2  -5  13   68.69    8.80
  -2  -5 -13   61.09    8.20
   2  -5  14    2.30    9.50
  -2  -5 -14   12.50    7.90
  -2  -5 -14    5.40    5.90
   2  -5  15    9.40    9.00
  -2  -5 -15    2.50    8.50
  -2  -5 -15   -5.30    5.80
  -2  -5 -16    9.40    8.90
   2  -5  16    1.50   10.70
  -2  -5 -17   -5.10    9.70
   2  -6 -17    1.00   16.50
   2  -6 -16   19.10    7.10
  -2  -6  16    6.00   11.90
   2  -6 -16   18.60   10.50
   2  -6 -15   35.00    7.00
   2  -6 -15   25.00    8.80
  -2  -6  15   36.90   11.60
   2  -6 -14   15.60    9.40
  -2  -6  14  -15.50   10.10
   2  -6 -14    9.70    6.50
   2  -6 -13  145.79   11.20
  -2  -6  13  142.69   12.30
   2  -6 -13  131.19   11.60
  -2  -6  12   -2.70    5.30
   2  -6 -12    8.40    6.20
   2  -6 -12   18.90    8.30
  -2  -6  12    6.90    8.90
  -2   6  11  133.99   33.10
   2  -6 -11  139.39   37.60
  -2  -6  11  176.88   11.20
   2  -6 -11  154.58   10.60
  -2  -6  11  213.38   39.20
  -2  -6  11  140.99    7.40
   2  -6 -11  160.88   10.10
   2   6 -10   21.00   14.00
  -2   6  10   34.50   28.90
  -2  -6  10    8.20    4.10
   2  -6 -10   20.10    5.90
  -2  -6  10   10.80    7.60
   2  -6 -10    9.60    7.00
  -2  -6  10  -27.10   30.60
   2  -6 -10   21.20   30.90
  -2   6   9  234.28   37.80
   2   6  -9  205.38   14.00
   2  -6  -9  183.08   10.20
   2  -6  -9  183.18   10.30
  -2  -6   9  189.48    8.70
  -2  -6   9  198.18   11.60
  -2  -6   9  211.78   35.70
   2  -6  -9  210.28   35.40
  -2   6   8   46.80   26.00
   2   6  -8   34.60    7.50
  -2  -6   8  -34.50   23.80
   2  -6  -8   37.70    5.90
  -2  -6   8   33.70    4.70
  -2  -6   8   30.50    6.00
   2  -6  -8   58.69   27.10
   2  -6  -8   34.00    5.70
  -2   6   7   36.80    4.10
   2   6  -7   41.10    7.70
  -2  -6   7   26.00   28.00
   2  -6  -7   40.70   39.30
  -2  -6   7   44.10    6.50
   2  -6  -7   32.40    5.60
   2  -6  -7   34.70    5.80
  -2  -6   7   40.80    5.00
  -2   6   6   13.80    3.50
   2   6  -6   13.40    7.00
   2  -6  -6    9.10    5.40
   2  -6  -6   10.40    5.10
  -2  -6   6   15.40    2.40
   2  -6  -6  -12.00   25.30
  -2  -6   6    7.90    5.60
  -2  -6   6   12.80   22.50
  -2  -6   6   11.90    4.70
   2   6  -5   20.80    6.70
  -2   6   5   14.30   23.70
  -2   6   5   20.60    5.20
  -2  -6   5    4.90    4.50
  -2  -6   5   24.80    5.20
   2  -6  -5    7.90    5.60
  -2  -6   5   53.99   26.00
   2  -6  -5   60.89   25.10
   2  -6  -5    6.00    4.60
  -2  -6   5   16.20    2.90
   2   6  -4   17.90    6.20
   2   6  -4   17.40   24.20
  -2   6   4    4.40   20.40
  -2   6   4   14.30    4.20
  -2  -6   4  -16.00   35.80
   2  -6  -4   19.80   22.10
  -2  -6   4   16.40    3.20
  -2  -6   4   15.80    5.00
  -2  -6   4   13.20    4.30
   2  -6  -4    5.60    4.50
  -2   6   3  204.48    8.70
   2   6  -3  219.98   31.70
   2   6  -3  209.98   10.90
  -2   6   3  251.87   33.90
   2  -6  -3  186.28   10.50
   2  -6  -3  251.47   33.90
  -2  -6   3  195.68    9.60
   2  -6  -3  211.08    9.10
  -2  -6   3  215.48    8.30
  -2  -6   3  214.68    7.70
   2  -6  -3  209.38    6.30
  -2  -6   3  247.88   36.80
  -2   6   2    1.50    4.70
  -2   6   2   -6.10   20.10
   2   6  -2  -19.60   22.30
   2   6  -2   11.70    5.60
  -2  -6   2    5.50    5.10
   2  -6  -2    9.20    4.00
   2  -6  -2    0.00   19.90
   2  -6  -2    6.00    4.40
  -2  -6   2   14.80    3.70
   2  -6  -2    9.20    2.40
  -2  -6   2    9.20    3.70
  -2  -6   2   21.90   26.10
   2   6  -1  224.88   30.80
  -2   6   1  219.58   10.10
  -2   6   1  201.98   28.20
   2   6  -1  207.68   10.30
   2  -6  -1  220.98   33.60
   2  -6  -1  205.68    8.70
  -2  -6   1  219.48    7.60
  -2  -6   1  242.98   35.70
   2  -6  -1  222.78    8.50
  -2  -6   1  206.38    8.00
   2  -6  -1  214.08    7.20
  -2   6   0   88.89    8.10
   2   6   0   89.29    8.60
  -2   6   0   99.99   23.10
   2   6   0  107.09   27.40
   2  -6   0  104.59    6.20
   2  -6   0  136.19   26.80
  -2  -6   0  104.89   27.30
   2  -6   0   99.59    5.40
   2  -6   0   90.89    6.80
  -2  -6   0   79.29    8.20
  -2  -6   0   94.59    6.90
  -2  -6   0   95.79    5.60
  -2   6  -1  151.98   10.10
   2   6   1  152.38    9.00
   2   6   1  195.28   30.60
   2  -6   1  194.28   29.20
   2  -6   1  175.08    7.00
  -2  -6  -1  162.28    7.90
   2  -6   1  163.98    6.90
  -2  -6  -1  235.18   37.50
   2  -6   1  149.49    8.40
  -2  -6  -1  156.38    6.20
  -2  -6  -1  162.08    9.20
  -2   6  -2  118.29    9.40
   2   6   2  114.19    8.30
   2   6   2  114.19   28.90
  -2  -6  -2  129.99    5.10
  -2  -6  -2  104.99    7.80
   2  -6   2  127.69   25.80
  -2  -6  -2  136.19   28.10
   2  -6   2  117.49    6.90
   2  -6   2  178.78   28.90
   2  -6   2  137.39    6.10
  -2  -6  -2  118.59    7.80
   2  -6   2  125.59    6.90
   2   6   3  118.69   27.90
   2   6   3   87.49    7.50
  -2   6  -3   82.69    9.40
  -2  -6  -3   90.19    4.30
   2  -6   3  120.69   27.50
  -2  -6  -3  102.89   26.70
  -2  -6  -3   91.69    7.80
   2  -6   3  101.49   27.50
   2  -6   3   86.89    7.30
   2  -6   3  100.39    6.60
   2   6   4  117.89   28.20
   2   6   4   74.39    7.00
  -2   6  -4   81.39    9.90
  -2  -6  -4   82.19    6.90
  -2  -6  -4   71.09    8.20
   2  -6   4  114.89   28.80
   2  -6   4   73.59    7.10
   2  -6   4  160.38   28.00
   2  -6   4   73.19    7.00
  -2  -6  -4   76.09   29.70
  -2   6  -5   48.40    7.40
   2   6   5   43.00    6.00
   2   6   5   38.00   22.60
   2  -6   5   59.79   28.70
   2  -6   5    9.30   25.20
  -2  -6  -5   32.90    5.70
   2  -6   5   31.80    6.20
   2  -6   5   35.10    4.90
  -2  -6  -5   40.20   28.00
  -2  -6  -5   28.80    6.00
  -2   6  -6   55.79    5.10
   2   6   6   28.80   26.50
   2   6   6   68.29    5.10
  -2   6  -6   42.40    7.60
  -2  -6  -6   55.19    6.30
  -2  -6  -6   49.00    5.70
  -2  -6  -6   48.60   25.70
   2  -6   6   49.00   28.60
   2  -6   6   79.59   27.50
   2  -6   6   52.79    5.00
   2  -6   6   50.09    6.20
  -2   6  -7    1.50    3.20
   2   6   7   20.00   23.70
  -2   6  -7   -1.00    7.10
  -2  -6  -7   -7.40    5.60
   2  -6   7  -20.00   24.70
   2  -6   7   -5.10    5.70
  -2  -6  -7   14.60   28.80
   2  -6   7   -2.40    4.20
  -2  -6  -7   -2.30    5.60
  -2   6  -8   -7.60    7.60
   2   6   8   15.70   25.00
  -2   6  -8    3.80    3.10
   2  -6   8   -3.10    4.40
   2  -6   8    2.80    5.70
  -2  -6  -8    0.80    6.00
  -2  -6  -8  -30.40   27.30
   2  -6   8   15.00   26.70
  -2  -6  -8   -4.50    5.40
  -2   6  -9    8.70    3.10
   2   6   9   36.80   29.70
  -2   6  -9    6.00    8.70
  -2  -6  -9    0.70    5.20
   2  -6   9  -43.40   31.50
  -2  -6  -9    5.30    6.40
   2  -6   9    8.00    4.50
   2  -6   9    6.20    6.30
  -2  -6  -9  -13.40   33.20
   2   6  10    0.30   31.90
  -2   6 -10   -1.20    2.90
   2  -6  10   20.30   34.50
  -2  -6 -10    2.40    7.50
   2  -6  10   -2.10    7.30
  -2  -6 -10    3.70   36.70
   2  -6  10   -1.10    4.30
  -2  -6 -10    0.00    5.60
   2  -6  11   12.20    7.50
   2  -6  11   24.30    4.40
   2  -6  11   -0.50   35.40
  -2  -6 -11   15.20    8.10
  -2  -6 -11   17.60    6.20
  -2  -6 -12    7.50    7.80
   2  -6  12   -5.20    8.10
  -2  -6 -12    4.90    6.30
  -2  -6 -13   -5.70    7.90
  -2  -6 -13    1.50    6.40
   2  -6  13   -8.60    9.30
   2  -6  14   -5.50   10.10
  -2  -6 -14    0.80    6.70
  -2  -6 -14    1.30    8.50
   2  -6  15    6.00   10.30
  -2  -6 -15    0.70    7.00
  -2  -6 -15    9.30   10.10
  -2  -6 -16   -3.10   16.30
  -2  -6 -16  -18.70    6.60
  -2  -7  15   12.20   12.90
   2  -7 -15   22.40    9.80
   2  -7 -15    8.70    7.50
   2  -7 -14    7.50    7.30
   2  -7 -14   -5.60    9.90
  -2  -7  14   -5.00   11.20
   2  -7 -13    2.90    9.70
   2  -7 -13   11.20    7.30
  -2  -7  13    5.50    9.30
   2  -7 -12    3.90    8.20
   2  -7 -12   16.00    7.10
  -2  -7  12    9.00   10.10
   2  -7 -11    7.20    7.00
  -2  -7  11  -13.30    8.90
  -2  -7  11   -1.30    4.90
   2  -7 -11   -6.00    7.50
   2  -7 -10   -6.60    7.00
   2  -7 -10   -0.60    6.50
  -2  -7  10    7.90    5.00
  -2  -7  10   -1.80    8.10
  -2   7   9   41.90   40.00
   2  -7  -9   -2.00   41.30
  -2  -7   9   24.60   33.60
  -2  -7   9   -1.80    7.70
   2  -7  -9   -5.00    6.50
   2  -7  -9   -6.60    7.30
  -2  -7   9   -0.50    5.20
   2  -7  -8   -9.80    7.00
   2  -7  -8   -7.60    6.00
  -2  -7   8    4.10    5.50
  -2  -7   8  -13.00    7.20
  -2  -7   8    2.30   31.40
   2   7  -7    6.00    8.20
  -2   7   7   -2.50    3.60
  -2  -7   7   -6.30    2.20
   2  -7  -7   -3.90    5.80
   2  -7  -7   -9.40    5.50
   2  -7  -7   14.90   32.50
  -2  -7   7   -4.30    6.50
  -2  -7   7   16.90   30.10
  -2  -7   7  -14.90    6.10
  -2   7   6    6.50   29.10
   2   7  -6    2.40    7.80
   2  -7  -6    0.30    6.10
   2  -7  -6   -4.20    5.70
   2  -7  -6  -33.40   30.70
  -2  -7   6    3.90    2.80
  -2  -7   6    1.00    5.80
  -2  -7   6   82.89   29.50
  -2   7   5  -13.80   29.10
   2   7  -5    2.50    7.40
  -2   7   5    7.60    4.80
  -2  -7   5    1.20    6.20
   2  -7  -5   -0.50    5.90
  -2  -7   5    4.20    3.30
   2  -7  -5   -0.90    5.40
  -2  -7   5    0.20    5.40
  -2  -7   5   64.79   28.90
   2  -7  -5   31.40   30.30
  -2   7   4    7.70    4.90
   2   7  -4   -1.00    7.00
  -2   7   4    1.40   26.70
   2  -7  -4    2.50    2.00
  -2  -7   4   -2.50    5.70
   2  -7  -4   -0.80    5.20
   2  -7  -4   -2.70    5.80
  -2  -7   4    2.70    3.70
   2  -7  -4   25.30   30.50
   2   7  -3   18.50    7.20
   2   7  -3   48.90   32.70
  -2   7   3   18.70   25.20
  -2   7   3   20.30    5.60
   2  -7  -3   15.70    6.10
   2  -7  -3   19.70    5.10
   2  -7  -3   36.70   29.60
  -2  -7   3   14.90    4.30
  -2  -7   3    8.90    4.70
  -2  -7   3    2.50    5.90
   2  -7  -3   20.50    2.70
  -2   7   2   75.09    8.60
   2   7  -2   81.69   30.40
  -2   7   2   76.39   29.50
   2   7  -2   64.69    7.70
   2  -7  -2   57.39    6.50
   2  -7  -2   60.09   25.90
  -2  -7   2   64.49    6.90
   2  -7  -2   67.09    4.80
  -2  -7   2   58.69    6.90
   2  -7  -2   60.29    6.30
  -2  -7   2   63.79    5.20
  -2  -7   2   52.39   33.70
  -2   7   1  114.79   26.30
   2   7  -1   81.19   29.00
  -2   7   1   94.09    9.80
   2   7  -1   81.89    9.80
   2  -7  -1   99.99    6.70
  -2  -7   1   92.39    8.60
   2  -7  -1   94.69    9.20
   2  -7  -1  142.99   32.30
  -2  -7   1   86.59    6.80
  -2  -7   1   91.69    7.10
   2  -7  -1   98.89    5.90
  -2  -7   1  171.38   37.30
   2   7   0   12.90    6.40
  -2   7   0   17.70    6.60
  -2   7   0    4.70   26.50
   2   7   0   29.00   27.10
  -2  -7   0    4.40    5.10
  -2  -7   0   15.90    3.70
   2  -7   0   10.70    5.10
   2  -7   0    7.00    4.80
   2  -7   0    5.20   27.40
  -2  -7   0   10.30    6.30
   2  -7   0   22.00    3.80
  -2  -7   0   68.19   33.20
   2   7   1  162.48   35.20
  -2   7  -1  196.38   11.30
   2   7   1  182.08   10.80
   2  -7   1  198.98   36.60
  -2  -7  -1  160.88    7.00
  -2  -7  -1  159.98    9.90
   2  -7   1  168.58    8.20
  -2  -7  -1  163.78    9.10
  -2  -7  -1  270.47   42.40
   2  -7   1  176.48    7.80
   2  -7   1  167.28    9.00
   2   7   2   16.90    6.10
   2   7   2  -11.40   26.20
  -2   7  -2   21.70    7.20
  -2  -7  -2   17.10    9.40
   2  -7   2   16.10    4.60
  -2  -7  -2   10.90    3.10
   2  -7   2   15.00   25.80
  -2  -7  -2   12.10    5.80
   2  -7   2   10.70    4.40
   2  -7   2   17.40    5.70
  -2  -7  -2  -47.40   30.80
   2   7   3  256.77   38.10
   2   7   3  267.97   11.20
  -2   7  -3  260.07   13.40
   2  -7   3  240.48   11.00
  -2  -7  -3  243.48    7.80
  -2  -7  -3  252.57   11.30
  -2  -7  -3  300.07   47.80
   2  -7   3  255.97    9.40
   2  -7   3  264.27   42.20
   2  -7   3  261.97   10.30
  -2  -7  -3  250.57   12.40
   2   7   4   14.20   27.40
  -2   7  -4   40.00    8.10
   2   7   4   50.29    5.70
   2  -7   4   36.80    5.70
   2  -7   4   -2.30   30.80
   2  -7   4   32.90    5.90
   2  -7   4   40.00    4.50
  -2  -7  -4   26.10    2.60
  -2  -7  -4   36.30    6.70
  -2  -7  -4   67.89   31.40
  -2  -7  -4   31.70    6.80
   2   7   5  361.36   41.00
   2   7   5  338.07   11.60
  -2   7  -5  344.17   15.80
   2  -7   5  327.37   12.40
  -2  -7  -5  347.07   13.60
  -2  -7  -5  341.37   45.40
  -2  -7  -5  333.07   13.90
   2  -7   5  457.85   50.79
   2  -7   5  337.67   10.50
   2  -7   5  323.07   13.00
  -2   7  -6   48.00    8.90
   2   7   6   60.69   32.40
   2   7   6   56.79    6.30
  -2  -7  -6   45.80    7.10
  -2  -7  -6   45.70    6.80
   2  -7   6   41.10    6.40
   2  -7   6   36.50    8.50
  -2  -7  -6   24.00   36.00
   2  -7   6   51.89    5.70
   2  -7   6   64.69   45.10
   2   7   7  339.87    9.50
   2   7   7  380.66   48.80
   2  -7   7  286.67   17.20
  -2  -7  -7  330.37   13.90
   2  -7   7  320.97   10.00
  -2  -7  -7  319.07   13.00
   2  -7   7  316.77   13.50
  -2  -7  -7  355.66   54.89
   2  -7   7  342.67   59.49
   2   7   8   24.50   35.70
  -2  -7  -8   28.90    7.90
   2  -7   8   12.40   40.20
   2  -7   8   26.10    7.50
   2  -7   8   16.30    5.80
  -2  -7  -8   16.50    6.60
  -2  -7  -8   70.99   39.70
   2  -7   9  271.97   11.20
   2  -7   9  272.27   53.79
  -2  -7  -9  266.07   12.80
   2  -7   9  252.97   13.80
  -2  -7  -9  276.77   13.10
  -2  -7 -10    3.00    8.30
   2  -7  10  -23.90   66.49
   2  -7  10   -5.10    8.00
  -2  -7 -10    7.10    6.70
   2  -7  10    9.10    5.50
  -2  -7 -11   98.09   11.10
  -2  -7 -11   75.49    8.90
   2  -7  11   58.39    8.80
  -2  -7 -12    3.50    6.80
  -2  -7 -12    7.50    8.40
   2  -7  12   10.90    8.60
  -2  -7 -13   32.30    7.50
   2  -7  13   31.80   10.10
  -2  -7 -13   37.00   10.30
  -2  -7 -14    0.90   10.50
  -2  -7 -14   -2.10    7.40
   2  -7  14    3.40   10.80
  -2  -7 -15   -9.30    7.80
   2  -8 -14   20.70    8.50
   2  -8 -13   21.10    8.30
   2  -8 -13   19.60   10.90
  -2  -8  13   10.50   11.50
   2  -8 -12   17.10   10.20
   2  -8 -12   21.00    8.00
  -2  -8  12   12.20   10.30
  -2  -8  11   27.50    6.30
  -2  -8  11   32.90   10.30
   2  -8 -11   33.30    8.00
   2  -8 -11   28.80    9.90
  -2  -8  10    3.20    6.00
   2  -8 -10    7.20    7.50
  -2  -8  10    3.70    9.20
   2  -8 -10    5.40    9.00
   2  -8  -9   34.40    9.00
   2  -8  -9   30.10    7.50
  -2  -8   9   41.50    8.60
  -2  -8   9   36.70    6.40
  -2  -8   8    5.80    6.40
   2  -8  -8   -1.10    8.10
  -2  -8   8    2.80    7.90
   2  -8  -8    1.50    7.70
  -2  -8   7   10.80    7.10
  -2  -8   7   17.20    6.50
   2  -8  -7   13.80    8.00
   2  -8  -7    5.20    6.60
  -2   8   6    8.40    5.20
   2  -8  -6   57.29   73.69
   2  -8  -6  -13.80    7.10
  -2  -8   6    9.60    6.70
  -2  -8   6   71.59   43.80
   2  -8  -6   -7.00    7.20
  -2  -8   6    4.70    6.80
  -2   8   5  -64.19   34.30
   2   8  -5    2.90   10.90
  -2   8   5    6.90    5.60
  -2  -8   5   -1.50    6.30
   2  -8  -5   -4.40    6.20
  -2  -8   5    2.60    6.00
  -2  -8   5   -0.10    3.90
  -2  -8   5   39.20   37.50
   2  -8  -5   40.60   38.20
   2  -8  -5   -7.70    7.10
   2   8  -4   14.10    8.60
  -2   8   4   22.40   34.80
  -2   8   4   21.50    6.10
   2  -8  -4   -0.30    7.00
   2  -8  -4   32.20   33.60
  -2  -8   4    6.40    4.50
   2  -8  -4    2.80    6.00
  -2  -8   4   11.30    5.90
  -2  -8   4    1.20    6.90
  -2   8   3   11.80    6.40
   2   8  -3   12.40    8.20
  -2   8   3   38.70   30.30
   2  -8  -3    9.80    3.00
  -2  -8   3   11.90    4.80
   2  -8  -3   -6.70    6.00
  -2  -8   3    7.00    5.20
   2  -8  -3    4.10    6.50
  -2  -8   3   -5.00    6.80
   2  -8  -3   48.60   37.50
  -2   8   2   61.79    7.40
   2   8  -2   52.39    8.80
  -2   8   2   10.80   29.10
  -2  -8   2   31.30    6.70
   2  -8  -2   90.39   37.50
   2  -8  -2   44.10    3.90
   2  -8  -2   28.90    7.20
   2  -8  -2   44.90    6.50
  -2  -8   2   49.60    5.80
  -2  -8   2   48.90    5.70
   2   8  -1   19.70   38.90
  -2   8   1    7.10    7.00
  -2   8   1   38.30   30.30
   2   8  -1    4.90    7.70
   2  -8  -1   -6.20    5.80
   2  -8  -1   -1.60    5.80
  -2  -8   1   -2.60    7.20
  -2  -8   1   -5.80    4.50
   2  -8  -1    2.60    3.80
  -2  -8   1   -6.30    5.30
   2  -8  -1   12.70   37.30
   2   8   0   31.60   39.20
   2   8   0   60.59    8.30
  -2   8   0   48.40    8.30
   2  -8   0   33.80    6.40
  -2  -8   0   52.09    4.80
  -2  -8   0   67.49   44.60
  -2  -8   0   36.50    7.70
   2  -8   0   97.89   33.60
   2  -8   0   42.90    5.90
  -2  -8   0   50.79    8.90
   2  -8   0   54.89    4.80
   2   8   1   38.20    7.80
   2   8   1   26.00   36.80
  -2   8  -1   46.50    8.40
  -2  -8  -1   84.49   44.10
   2  -8   1   23.60    5.00
   2  -8   1   17.90   37.70
  -2  -8  -1   32.90    6.40
   2  -8   1   22.20    6.10
  -2  -8  -1   20.10    7.50
   2  -8   1   28.60    5.80
  -2  -8  -1   25.90    4.00
   2   8   2   15.90   38.40
  -2   8  -2   69.49    9.10
   2   8   2   66.99    7.70
  -2  -8  -2   55.59    4.20
  -2  -8  -2   59.19    8.20
   2  -8   2   31.60    6.90
  -2  -8  -2   52.69    7.00
   2  -8   2   75.99   38.90
   2  -8   2   53.89    7.20
  -2  -8  -2   71.89   39.70
  -2   8  -3   13.30    8.60
   2   8   3   27.70   37.40
   2   8   3   23.80    6.70
   2  -8   3   23.00    5.50
   2  -8   3   11.70    6.40
  -2  -8  -3   -3.80   37.50
  -2  -8  -3   -3.60    6.50
  -2  -8  -3   17.20    6.20
   2  -8   3   24.30    5.00
   2  -8   3   42.20   42.00
  -2  -8  -3    7.90    3.10
  -2   8  -4   -3.80    9.10
   2   8   4   43.10   35.00
   2   8   4   24.50    6.30
   2  -8   4   11.50    5.00
  -2  -8  -4    2.00    7.20
   2  -8   4    1.80    6.60
   2  -8   4   -3.10    5.50
  -2  -8  -4  -10.80    7.30
  -2  -8  -4   14.10   42.40
   2   8   5   31.70    5.90
   2   8   5   65.49   40.70
  -2  -8  -5   14.80    7.60
   2  -8   5    2.10    6.40
  -2  -8  -5   10.60   45.10
  -2  -8  -5    8.00    7.50
   2  -8   5   12.40    4.80
   2  -8   5    7.20    6.20
   2   8   6   53.19   46.50
   2   8   6   22.40    5.10
   2  -8   6   -1.20    6.30
  -2  -8  -6    1.10    6.90
  -2  -8  -6  128.79   54.19
   2  -8   6    3.80    4.50
   2  -8   6    4.80    6.90
  -2  -8  -6   -1.30    7.60
  -2  -8  -7   -5.00    7.60
  -2  -8  -7    2.50    7.20
   2  -8   7   -0.60    4.30
   2  -8   7    5.00    6.60
   2  -8   7   -9.70    7.10
  -2  -8  -8   10.70    7.70
  -2  -8  -8    2.10    6.80
   2  -8   8   -2.60    6.50
   2  -8   8   -7.20    7.70
  -2  -8  -9    3.60    7.90
   2  -8   9    4.50    6.60
  -2  -8  -9    3.30    9.10
   2  -8   9   11.50    8.00
   2  -8  10   21.70    9.20
  -2  -8 -10   30.70    8.00
  -2  -8 -10   32.60    8.80
   2  -8  10   31.80    6.70
   2  -8  11   10.30    7.90
  -2  -8 -11    3.60    7.50
   2  -8  11   -2.70    9.60
  -2  -8 -11    1.10    9.80
  -2  -8 -12   19.00    9.60
   2  -8  12    3.70   10.30
  -2  -8 -12   26.90    8.00
  -2  -8 -13    9.90    8.20
   2  -9 -12   -4.60    9.10
  -2  -9  11   -6.90   10.90
   2  -9 -11   -3.80    9.60
   2  -9 -11    2.80    8.70
  -2  -9  11  -14.20    8.90
   2  -9 -10   -3.30    8.80
  -2  -9  10   -4.50    6.90
   2  -9 -10   -6.20    9.10
  -2  -9  10  -10.90   10.00
   2  -9  -9    4.70    9.80
   2  -9  -9   -9.90    8.90
  -2  -9   9    1.60    7.20
  -2  -9   9   -6.60    8.90
   2  -9  -8    2.50    8.40
   2  -9  -8    1.40    9.30
  -2  -9   8    1.60    7.50
  -2  -9   8   -3.40    8.40
  -2  -9   7    1.40    7.80
   2  -9  -7    1.90    8.20
  -2  -9   7   14.80    7.50
   2  -9  -7    2.70    7.80
   2  -9  -6   -0.60    8.40
   2  -9  -6  -11.20    8.30
  -2  -9   6    0.20    7.40
  -2  -9   6   -1.10    7.70
  -2   9   5   36.90    6.90
  -2  -9   5   12.80    8.00
  -2  -9   5   17.00    4.80
   2  -9  -5   20.50    8.50
  -2  -9   5   16.40    7.20
   2  -9  -5   11.50    7.20
  -2   9   4   21.90    7.20
   2  -9  -4   -1.60    7.30
   2  -9  -4    2.80    7.50
  -2  -9   4   -2.20    5.10
  -2  -9   4   -1.00    6.10
  -2  -9   4   -3.30    7.80
  -2   9   3   27.00    7.50
   2  -9  -3    9.90    6.50
  -2  -9   3   17.40    5.60
   2  -9  -3   -5.20    7.80
  -2  -9   3    9.80    8.00
  -2  -9   3   19.10    6.30
   2   9  -2   15.00   11.10
  -2   9   2   21.60    8.00
   2  -9  -2   10.90    3.90
  -2  -9   2    1.80    5.60
   2  -9  -2   -5.30    7.00
  -2  -9   2   15.70    6.10
  -2  -9   2   -0.90    8.00
   2  -9  -2    8.60    7.10
  -2   9   1   13.30    8.30
   2   9  -1   22.40    9.60
   2  -9  -1    2.60    6.70
  -2  -9   1   -0.60    6.80
   2  -9  -1    7.40    4.30
   2  -9  -1   -2.30    7.90
  -2  -9   1  -10.80    8.10
  -2  -9   1   -6.40    6.30
   2   9   0   31.50    9.50
  -2   9   0   15.60    8.80
   2  -9   0    1.50    7.90
  -2  -9   0   10.90    6.90
  -2  -9   0    6.80    7.50
   2  -9   0   10.50    6.50
  -2  -9   0    1.50    4.60
   2  -9   0   11.60    4.80
  -2   9  -1   18.10    9.90
   2   9   1   24.40    8.90
  -2  -9  -1   -0.80    4.30
   2  -9   1   -5.40    6.10
  -2  -9  -1    7.90    7.50
   2  -9   1   -2.20    7.90
   2  -9   1   10.70    5.40
  -2  -9  -1   11.50    7.10
   2   9   2   31.90   60.79
   2  -9   2   36.50    7.20
  -2  -9  -2   34.00    4.30
  -2  -9  -2   44.00    7.90
   2  -9   2   44.40    6.20
  -2  -9  -2   31.60    8.60
   2  -9   2   39.40    6.60
   2  -9   3    5.70    5.60
  -2  -9  -3    6.10    8.40
   2  -9   3    1.80    5.80
  -2  -9  -3    0.80    7.50
   2  -9   3   -2.50    7.70
  -2  -9  -4   71.59    8.90
   2  -9   4   84.69    9.60
  -2  -9  -4   69.79    8.70
   2  -9   4   65.09    6.50
   2  -9   4   69.39    8.70
   2  -9   5   11.30    7.00
  -2  -9  -5    4.50    7.60
  -2  -9  -5    3.00    8.30
   2  -9   5   -3.50    9.50
   2  -9   5   15.70    7.80
   2  -9   6   82.09    8.80
   2  -9   6  110.49   12.30
  -2  -9  -6   82.99    9.60
  -2  -9  -6  132.79   13.10
   2  -9   6  127.89    8.40
  -2  -9  -7   -4.00    9.00
   2  -9   7    7.50    7.70
   2  -9   7    2.50    8.00
  -2  -9  -7    4.10    7.90
   2  -9   8   52.09    9.30
   2  -9   8   56.69    8.20
  -2  -9  -8   52.99    8.70
  -2  -9  -8   60.69   10.50
   2  -9   9    8.40    9.50
  -2  -9  -9   24.60   10.20
  -2  -9  -9   24.60    9.30
   2  -9   9   34.10    7.90
  -2  -9 -10   20.90    9.70
   2  -9  10   43.40    7.70
  -2  -9 -10   30.80    9.00
   2  -9  10   30.80   10.30
  -2  -9 -11    6.90    8.90
   2  -9  11    0.00   10.60
  -2 -10   9   -3.70    8.20
   2 -10  -9    1.70   12.90
  -2 -10   9   -7.90    9.90
  -2 -10   8    3.70    8.10
   2 -10  -8   -6.10    9.20
   2 -10  -8   -1.40    9.80
  -2 -10   8   15.10    9.60
  -2 -10   7    5.80    8.50
   2 -10  -7  -12.10    9.80
   2 -10  -7    8.40   10.00
  -2 -10   7    1.50    8.50
   2 -10  -6   -3.50    9.50
   2 -10  -6   -7.50    9.70
  -2 -10   6   -4.70    8.70
  -2 -10   6    2.00    8.10
   2 -10  -5   -7.60    9.10
   2 -10  -5    1.80    8.00
  -2 -10   5    4.80    9.00
  -2 -10   5   11.70    7.50
   2 -10  -4  -13.30    8.40
  -2 -10   4    3.70    9.00
   2 -10  -4   -8.90    8.20
  -2 -10   4    4.60    6.80
  -2  10   3   42.40    9.00
  -2 -10   3   -0.10    9.30
   2 -10  -3   19.20    8.60
  -2 -10   3    3.40    6.70
   2 -10  -3    4.60    9.30
  -2 -10   3   17.30    6.30
  -2  10   2   23.30    9.40
   2 -10  -2   -1.90    7.90
   2 -10  -2  -13.50    8.90
  -2 -10   2    6.70    9.10
  -2 -10   2    0.30    5.80
  -2 -10   2    8.60    6.60
   2 -10  -1   20.50    8.30
  -2 -10   1    6.70    5.70
  -2 -10   1   12.50    9.40
  -2 -10   1   17.20    7.20
   2 -10  -1   11.10    7.50
  -2 -10   0    4.20    7.10
  -2 -10   0   15.30    9.10
   2 -10   0    7.90    5.50
   2 -10   0   -6.00    7.90
  -2 -10   0   -0.60    5.40
   2 -10   0    6.50    7.30
  -2 -10  -1   31.60    7.80
   2 -10   1   16.90    7.10
   2 -10   1   22.00    6.00
   2 -10   1   19.30    9.00
  -2 -10  -1    6.50    8.60
   2  10   2   49.00   10.00
   2 -10   2    3.50    6.90
   2 -10   2   13.30    6.00
  -2 -10  -2   -2.80    7.80
  -2 -10  -2   -4.00    9.40
   2 -10   2    0.00    9.00
  -2 -10  -3    9.70    8.30
   2 -10   3    7.90    6.70
   2 -10   3   -2.40    8.60
   2 -10   3   11.60    6.70
  -2 -10  -3   -2.20    9.70
  -2 -10  -4   -3.80    8.50
   2 -10   4  -11.00    8.80
   2 -10   4    7.30    6.30
  -2 -10  -4   12.30    9.00
   2 -10   4    5.50    6.80
  -2 -10  -5    4.60    9.90
   2 -10   5   -4.00    9.00
   2 -10   5  -11.10    7.10
  -2 -10  -5   -7.30    9.30
   2 -10   5    5.10    9.30
   2 -10   6   -4.20    8.80
  -2 -10  -6   -4.10    9.40
  -2 -10  -6   11.10   10.30
   2 -10   6    0.50    8.00
  -2 -10  -7    3.20    9.10
   2 -10   7   25.70    9.20
  -2 -10  -7    0.00   10.20
   2 -10   7   12.90    8.50
  -2 -10  -8   -2.30    9.50
   2 -10   8   -5.20    9.50
   2 -10   8   20.20    9.10
  -2 -10  -8   -4.00   11.30
   2 -10   9    3.80   10.30
   2 -10   9   21.10    8.80
   2 -11  -5   21.50   10.50
  -2 -11   5   20.00    8.30
  -2 -11   5   13.00   10.40
   2 -11  -4    6.20    9.90
  -2 -11   4   10.80    7.30
  -2 -11   4    9.90   10.60
  -2 -11   3    7.10    7.10
  -2 -11   3   22.30   10.70
   2 -11  -3   17.20    9.60
  -2 -11   2    6.20    6.70
  -2 -11   2    2.70   10.10
  -2 -11   2    0.40    7.30
   2 -11  -2   -6.20    8.90
   2 -11  -2  -12.50   17.80
  -2 -11   1    6.00   10.90
   2 -11  -1  -15.20   11.00
   2 -11  -1   18.40    8.70
  -2 -11   1    6.40    7.30
  -2 -11   0    6.00    8.20
  -2 -11   0    3.80   11.00
   2 -11   0    1.20    8.00
   2 -11   0   -5.10   10.80
  -2 -11  -1   -9.50    8.30
   2 -11   1    9.70    7.90
   2 -11   1    0.20   10.60
  -2 -11  -1    6.30   15.30
  -2 -11  -2   -5.40    8.80
   2 -11   2   -0.10    7.60
   2 -11   2    3.80    7.10
   2 -11   2    5.40   10.30
   2 -11   3    0.50   10.50
  -2 -11  -3    2.30    9.20
   2 -11   3    8.70    7.10
   2 -11   3    1.50    7.20
   2 -11   4  -12.80   10.40
  -2 -11  -4   -4.00    9.50
   2 -11   4   -1.80    7.70
  -3   0  20   33.70    9.30
  -3   0  19    1.90    8.30
  -3   0  18  126.29   12.10
   3   0 -18   87.19    8.90
  -3   0  17   -2.80    7.40
   3   0 -17   12.80    6.30
   3   0 -17    7.30    9.40
  -3   0  16  160.68   11.40
   3   0 -16  164.88   10.80
   3   0 -16  164.78    9.00
  -3   0  15   -7.40   21.00
   3   0 -15   -0.20    4.50
   3   0 -15    4.70    5.50
   3   0 -15   25.20   28.80
  -3   0  15   13.30    6.50
   3   0 -14  138.09   27.60
  -3   0  14   97.09   11.40
  -3   0  14  127.89   20.50
   3   0 -14  108.29    8.60
   3   0 -14  100.49    6.80
  -3   0  13   -5.40   16.50
   3   0 -13    4.20    4.70
   3   0 -13    2.90    3.70
   3   0 -13   28.10   20.10
  -3   0  13   10.80    5.50
  -3   0  12  117.09   17.50
   3   0 -12   93.89    5.90
   3   0 -12   71.59   19.50
  -3   0  12   82.29    7.20
   3   0 -12   92.39    7.10
  -3   0  11   -2.30    4.20
  -3   0  11    5.70   12.50
   3   0 -11   -1.90    3.90
   3   0 -11   16.30   14.90
   3   0 -10  461.05   13.40
   3   0 -10  440.56   12.50
  -3   0  10  445.56   13.00
  -3   0  10  480.25   24.20
   3   0 -10  487.55   26.20
   3   0  -9   -2.00    2.50
   3   0  -9   -1.40    3.20
  -3   0   9  -14.10    8.90
  -3   0   9    1.10    3.40
   3   0  -9   -9.50   10.30
   3   0  -9    2.20    1.70
   3   0  -8   72.99    2.70
  -3   0   8   73.19   11.60
   3   0  -8   65.69    3.80
  -3   0   8   56.19    4.80
   3   0  -8   64.89    5.10
   3   0  -8   75.59   11.50
   3   0  -7   -0.50    2.60
   3   0  -7    2.20    1.90
  -3   0   7    0.50    2.50
   3   0  -7    2.30    7.40
  -3   0   7   -1.10    6.40
   3   0  -6   79.79    9.50
  -3   0   6   98.69    3.00
   3   0  -6   84.49    4.50
   3   0  -6   85.69    3.50
  -3   0   6   97.19    4.20
  -3   0   5    2.60    1.80
  -3   0   5    1.00    4.20
  -3   0   5    1.80    1.10
   3   0  -5    3.30    2.00
   3   0  -5    5.20    4.70
  -3   0   4  334.47    8.20
  -3   0   4  330.77   10.70
  -3   0   4  327.87    8.30
   3   0  -4  313.77   11.10
   3   0  -4  332.17    8.90
  -3   0   4  332.57    8.60
  -3   0   3    1.50    2.00
  -3   0   3    3.30    1.10
  -3   0   3    2.20    1.30
   3   0  -3    3.90    1.40
  -3   0   3    4.40    2.40
  -3   0   3    1.00    0.90
   3   0  -2 1197.58   30.10
   3   0  -2 1272.47   31.70
  -3   0   2 1216.68   31.00
  -3   0   2 1259.17   29.80
  -3   0   2 1270.17   29.80
  -3   0   2 1184.78   30.00
  -3   0   2 1273.77   29.90
   3   0  -1    1.20    1.20
  -3   0   1    0.70    0.90
  -3   0   1   -1.00    0.80
  -3   0   1   -0.50    2.60
  -3   0   1    2.10    1.20
  -3   0   1   -0.70    0.90
   3   0  -1   -2.20    2.40
   3   0   0 1542.15   39.70
  -3   0   0 1400.26   35.50
  -3   0   0 1454.05   35.40
  -3   0   0 1502.45   39.40
  -3   0   0 1511.85   35.40
   3   0   0 1440.96   35.40
   3   0   1    0.30    1.10
  -3   0  -1    0.60    1.10
  -3   0  -1    0.80    1.20
  -3   0  -1   -0.40    0.80
   3   0   1   -0.20    4.50
   3   0   1    1.60    1.30
  -3   0  -1    1.10    4.30
  -3   0  -2  705.33   16.80
   3   0   2  666.83   23.50
  -3   0  -2  680.23   16.90
  -3   0  -2  681.73   17.10
  -3   0  -2  694.83   23.70
   3   0   2  721.53   17.00
  -3   0  -3    0.10    1.60
  -3   0  -3   -3.50    6.00
   3   0   3    1.90    1.50
  -3   0  -3    1.00    1.30
  -3   0  -3    1.00    1.10
  -3   0  -4 2534.15   62.09
  -3   0  -4 2663.83   72.49
   3   0   4 2562.04   62.19
  -3   0  -4 2589.54   61.89
   3   0   4 2680.03   72.69
  -3   0  -4 2500.45   62.19
  -3   0  -5    3.00    2.00
  -3   0  -5    7.20    8.90
  -3   0  -5    1.40    1.20
  -3   0  -5    2.60    2.20
   3   0   5    3.60    8.50
   3   0   5   -0.50    2.20
  -3   0  -6 3009.10   85.69
  -3   0  -6 2998.90   71.99
   3   0   6 3139.09   86.49
  -3   0  -6 2901.71   72.39
  -3   0  -6 3058.79   72.69
   3   0   6 2978.20   72.59
  -3   0  -7   -2.30    3.50
   3   0   7   -2.60    2.90
  -3   0  -7    2.40    1.40
  -3   0  -7    1.90    2.30
   3   0   7   -0.90   12.50
  -3   0  -7    7.60   11.70
  -3   0  -8 1887.41   62.89
   3   0   8 1885.31   46.80
   3   0   8 1978.60   64.19
  -3   0  -8 1887.31   46.60
  -3   0  -8 1928.81   46.90
  -3   0  -8 1926.31   46.00
   3   0   9   25.80   14.10
   3   0   9   -3.10    3.70
  -3   0  -9   -4.20    3.50
  -3   0  -9    7.30   14.70
  -3   0  -9    4.20    2.90
  -3   0  -9    1.20    1.60
  -3   0 -10  653.43   36.70
  -3   0 -10  644.74   16.30
   3   0  10  652.13   35.30
   3   0  10  657.03   18.00
  -3   0 -10  686.53   17.50
  -3   0 -10  665.33   18.00
  -3   0 -11   -4.30    1.60
  -3   0 -11  -29.20   18.50
   3   0  11   24.50   19.70
  -3   0 -11    6.20    3.90
  -3   0 -11    0.20    4.10
   3   0  11   -2.70    4.60
   3   0  12  144.09   24.70
  -3   0 -12  123.69    4.70
  -3   0 -12  130.79   26.10
  -3   0 -12  145.99    7.30
  -3   0 -12  143.39    8.30
   3   0  12  131.19    8.80
  -3   0 -13   17.20   25.20
   3   0  13   22.50   24.50
  -3   0 -13    7.60    8.20
  -3   0 -13   -0.70    5.00
   3   0  13    3.70    5.70
  -3   0 -14   19.90    5.50
  -3   0 -14   17.10    5.00
   3   0  14   17.60    6.40
   3   0  14   60.09   29.40
  -3   0 -14   15.60   27.80
  -3   0 -15    1.70    5.30
   3   0  15   -2.10    6.60
  -3   0 -15    4.20    5.60
  -3   0 -16    5.00    6.10
   3   0  16    0.70    6.90
  -3   0 -16    8.00    5.80
   3   0  17   -0.70    7.70
  -3   0 -17    2.80    6.20
   3   0  18    6.60    8.50
  -3   0 -18   -9.30    6.50
  -3   0 -19   -3.90    6.90
   3   0  19    1.40    8.80
   3  -1 -20  -10.10   10.50
  -3  -1  20   11.40    9.90
  -3   1  19    2.70    7.30
  -3  -1  19   -6.90    9.30
   3  -1 -19   11.80    7.00
  -3   1  18   22.70    7.30
   3   1 -18   39.30    8.00
   3  -1 -18   24.10    6.90
  -3  -1  18   15.30    8.90
  -3   1  17   12.40    6.70
   3   1 -17   13.30    7.40
   3   1 -17    5.60    4.60
   3  -1 -17   16.00    6.40
  -3  -1  17    2.80    8.10
  -3   1  16   46.90    6.60
   3   1 -16   58.69    6.20
   3   1 -16   53.79    7.60
   3  -1 -16   50.89    6.10
   3  -1 -16   71.89    8.10
  -3  -1  16   45.50    8.20
   3   1 -15   63.89   32.60
   3   1 -15   51.69    7.00
   3   1 -15   53.49    5.50
  -3   1  15   58.09   21.90
  -3   1  15   43.90    6.20
   3  -1 -15   55.89    6.90
  -3  -1  15   44.00   22.30
  -3  -1  15   54.99    7.50
   3  -1 -15   31.10   27.60
   3  -1 -15   53.89    7.40
   3   1 -14   91.49    5.70
  -3   1  14   94.09    8.10
  -3   1  14   81.59   20.10
   3   1 -14   86.09   27.70
   3   1 -14   85.89    9.90
   3  -1 -14   95.19    7.40
  -3  -1  14   86.89    7.60
  -3  -1  14   69.79   20.40
   3  -1 -14   94.99   25.80
   3  -1 -14   82.39    7.50
   3   1 -13   19.20    3.20
  -3   1  13    5.90    4.90
   3   1 -13   15.20    5.60
   3   1 -13   31.00   22.10
  -3   1  13   12.90   17.00
   3  -1 -13   13.80    4.00
   3  -1 -13   17.10    2.10
  -3  -1  13   16.00    7.40
   3  -1 -13   -2.00   18.30
   3  -1 -13   17.70    4.60
  -3  -1  13   26.40   16.40
  -3   1  12  378.66   12.10
  -3   1  12  347.27   26.00
   3   1 -12  396.06   10.90
   3   1 -12  384.16   13.50
   3   1 -12  369.86   30.60
   3  -1 -12  383.06   12.10
   3  -1 -12  451.05   10.50
  -3  -1  12  413.66   13.70
   3  -1 -12  388.46   12.20
   3  -1 -12  413.36   29.30
  -3  -1  12  389.16   28.00
  -3   1  11  335.07   23.00
   3   1 -11  343.17    9.40
   3   1 -11  323.17   27.00
   3   1 -11  351.16   12.00
  -3   1  11  341.57   10.60
  -3  -1  11  338.47   24.50
   3  -1 -11  385.46   25.80
   3  -1 -11  320.77   11.20
  -3  -1  11  351.66   11.70
   3  -1 -11  340.07   10.70
   3  -1 -11  346.47    9.20
   3   1 -10   64.19    6.60
   3   1 -10   72.69   16.80
   3   1 -10   78.59    4.00
  -3   1  10   68.29    5.40
  -3   1  10   92.29   14.10
  -3  -1  10  105.19   17.20
  -3  -1  10   75.99    6.70
   3  -1 -10   54.59   13.90
   3  -1 -10   70.19    3.80
   3  -1 -10   71.49    5.30
   3  -1 -10   72.19    5.50
  -3   1   9   63.39    4.60
   3   1  -9   70.29    3.60
  -3   1   9   65.69   11.70
   3   1  -9   59.79    6.50
   3   1  -9   61.29   14.60
  -3  -1   9   56.39    5.80
   3  -1  -9   75.29   12.40
   3  -1  -9   70.29    4.80
   3  -1  -9   68.69    3.50
  -3  -1   9   69.19   12.30
   3  -1  -9   67.79    4.80
   3   1  -8  131.09   17.00
  -3   1   8  127.79    5.20
   3   1  -8  132.29    4.40
   3   1  -8  138.59    7.00
  -3   1   8  130.99   12.80
   3  -1  -8  137.09   13.20
   3  -1  -8  127.09    5.50
   3  -1  -8  142.69    4.50
  -3  -1   8  172.58   14.90
  -3  -1   8  133.99    6.20
   3  -1  -8  132.59    5.50
   3   1  -7   19.90    9.50
  -3   1   7   14.30    2.30
   3   1  -7   11.30    3.20
   3   1  -7   13.60    1.70
  -3   1   7   23.30    7.20
   3  -1  -7   15.90    7.40
  -3  -1   7   12.90    3.00
   3  -1  -7   15.10    2.50
   3  -1  -7   12.80    2.60
  -3  -1   7   13.70    8.00
   3  -1  -7   12.30    1.80
  -3   1   6  170.78   10.80
   3   1  -6  168.88    5.30
  -3   1   6  166.78    5.10
   3   1  -6  140.79    7.70
   3  -1  -6  155.78    5.20
  -3  -1   6  157.28   12.30
   3  -1  -6  167.38    5.50
   3  -1  -6  169.38   10.70
   3  -1  -6  169.38    4.90
  -3  -1   6  161.48    5.90
  -3  -1   6  183.68    4.50
   3   1  -5  233.18    7.50
  -3   1   5  234.28    6.30
  -3   1   5  228.28   11.00
   3  -1  -5  219.88   10.40
  -3  -1   5  232.38    6.90
  -3  -1   5  237.18    6.00
  -3  -1   5  226.18   12.60
   3  -1  -5  229.38    6.80
   3  -1  -5  241.48    6.60
  -3  -1   5  229.78   13.80
  -3   1   4 1063.39   25.80
  -3   1   4 1085.59   25.80
   3   1  -4 1036.80   26.30
  -3   1   4 1069.69   25.60
  -3   1   4 1024.00   29.20
  -3  -1   4 1042.40   32.30
  -3  -1   4 1067.49   26.00
  -3  -1   4 1076.29   25.50
   3  -1  -4 1071.99   28.30
   3  -1  -4 1047.20   25.80
  -3  -1   4 1075.49   31.70
   3   1  -3  551.54   14.20
  -3   1   3  568.44   13.60
  -3   1   3  554.84   16.10
  -3   1   3  548.25   13.40
  -3   1   3  543.35   13.70
   3   1  -3  539.25   19.10
  -3   1   3  545.75   13.60
  -3  -1   3  550.94   13.80
  -3  -1   3  545.25   19.60
  -3  -1   3  554.44   13.40
   3  -1  -3  559.34   16.10
   3  -1  -3  524.25   13.60
   3   1  -2 9869.01  240.28
   3  -1  -2 9692.03  236.28
  -3  -1   2 9999.00  240.38
   3  -1  -2 9701.23  236.88
  -3   1   1  150.48    4.20
   3   1  -1  130.79    4.20
   3   1  -1  128.69    9.60
  -3   1   1  146.29    3.90
  -3   1   1  141.79    4.00
  -3   1   1  130.99    7.70
  -3  -1   1  149.69    3.80
  -3  -1   1  132.49    3.80
   3  -1  -1  122.59    4.40
   3  -1  -1  141.29    3.80
   3  -1  -1  140.79    7.40
  -3  -1   1  135.09    9.60
  -3  -1   1  141.29    4.10
  -3   1   0 1501.85   40.90
  -3   1   0 1476.55   36.30
  -3   1   0 1514.15   36.00
   3   1   0 1562.84   42.90
  -3   1   0 1484.85   36.00
  -3  -1   0 1545.75   42.60
  -3  -1   0 1513.85   36.00
  -3  -1   0 1490.75   36.00
   3  -1   0 1510.05   40.80
   3  -1   0 1503.75   36.00
  -3  -1   0 1427.76   36.20
  -3  -1   0 1455.55   36.00
  -3   1  -1 5905.91  143.89
   3   1   1 5993.90  145.09
  -3   1  -1 5541.75  137.39
  -3   1  -1 5562.44  137.49
  -3  -1  -1 6023.30  145.09
   3  -1   1 5680.33  137.59
   3  -1   1 5912.01  143.79
  -3  -1  -1 5507.25  137.49
  -3   1  -2 5407.56  132.59
   3   1   2 5473.25  132.59
  -3   1  -2 5390.56  132.49
   3   1   2 5907.41  141.49
  -3   1  -2 5867.01  140.69
   3   1   2 5168.68  132.69
  -3   1  -2 5325.07  132.99
  -3  -1  -2 6024.80  141.79
   3  -1   2 5689.33  140.49
  -3  -1  -2 5378.66  132.69
   3  -1   2 5542.15  132.79
   3   1   3  221.48   14.20
  -3   1  -3  206.98    5.50
   3   1   3  211.48    5.80
   3   1   3  205.78    6.10
  -3   1  -3  210.98    5.50
  -3   1  -3  188.98   13.60
  -3   1  -3  204.08    6.50
   3  -1   3  206.38    5.90
  -3  -1  -3  203.08    6.00
  -3  -1  -3  207.28   14.20
  -3  -1  -3  205.28    5.80
   3  -1   3  207.48   13.50
  -3  -1  -3  209.38    5.70
  -3   1  -4  663.53   27.00
   3   1   4  686.43   28.00
   3   1   4  694.03   16.90
  -3   1  -4  670.53   16.70
  -3   1  -4  687.53   17.40
  -3   1  -4  687.93   16.50
   3  -1   4  703.93   17.20
  -3  -1  -4  659.83   26.90
  -3  -1  -4  680.53   16.70
  -3  -1  -4  658.93   17.00
  -3  -1  -4  658.93   16.70
   3  -1   4  673.13   26.60
   3   1   5  730.33   29.60
  -3   1  -5  700.93   29.30
   3   1   5  696.03   17.50
  -3   1  -5  715.73   17.10
  -3   1  -5  700.63   17.40
  -3  -1  -5  683.83   17.40
   3  -1   5  720.33   28.80
  -3  -1  -5  696.23   17.70
   3  -1   5  697.43   17.90
  -3  -1  -5  713.83   17.30
  -3  -1  -5  670.13   28.60
  -3   1  -6  111.89    4.20
   3   1   6  119.09    4.60
  -3   1  -6  111.59    5.80
  -3   1  -6  144.69   16.80
   3   1   6  107.29   15.80
  -3   1  -6  120.69    3.70
   3  -1   6  132.49   15.70
  -3  -1  -6  126.39    5.30
   3  -1   6  112.59    5.40
  -3  -1  -6  104.09   16.10
  -3  -1  -6  117.49    4.40
  -3  -1  -6  121.49    4.10
  -3   1  -7   33.90    4.00
  -3   1  -7   34.30   15.10
  -3   1  -7   31.30    3.20
   3   1   7   42.00   14.90
  -3   1  -7   28.80    2.30
   3   1   7   38.40    3.10
   3  -1   7   31.70    3.70
  -3  -1  -7   33.20    3.60
  -3  -1  -7   28.10   12.80
   3  -1   7   48.30   14.70
  -3  -1  -7   38.00    2.80
  -3  -1  -7   31.60    3.20
  -3   1  -8  207.48   24.70
  -3   1  -8  181.88    7.70
  -3   1  -8  179.68    5.10
   3   1   8  184.08   23.10
  -3   1  -8  178.48    6.00
   3   1   8  181.08    6.80
  -3  -1  -8  173.58   23.60
   3  -1   8  179.48    7.50
  -3  -1  -8  182.88    6.30
  -3  -1  -8  184.68    5.50
   3  -1   8  199.08   23.00
  -3  -1  -8  185.38    7.20
   3   1   9    0.70    3.30
  -3   1  -9   -0.60    4.30
   3   1   9   10.80   16.80
  -3   1  -9    0.90   16.90
  -3   1  -9    1.10    1.50
  -3   1  -9    3.90    2.70
  -3  -1  -9    1.80    1.90
  -3  -1  -9    6.30   14.70
   3  -1   9   -9.00   13.70
  -3  -1  -9    1.60    2.80
   3  -1   9   -6.90    3.80
  -3  -1  -9    5.90    3.80
  -3   1 -10   93.29    7.90
  -3   1 -10  123.89   25.30
  -3   1 -10  100.19    5.50
   3   1  10  117.49   20.50
   3   1  10   96.89    6.50
  -3  -1 -10  126.69   21.90
  -3  -1 -10   96.79    4.20
  -3  -1 -10  104.39    6.80
   3  -1  10   97.09   19.40
   3  -1  10   84.99    7.20
   3   1  11   80.09    6.90
  -3   1 -11   90.29    5.30
  -3   1 -11   41.90   24.90
  -3   1 -11   75.59    8.20
   3   1  11   62.49   20.00
   3  -1  11  106.19   20.20
  -3  -1 -11   77.59    5.80
   3  -1  11   77.59    7.60
  -3  -1 -11   83.99    7.00
  -3  -1 -11  111.49   24.60
  -3  -1 -11   85.49    4.10
  -3   1 -12    3.20    5.50
   3   1  12    6.50   21.20
  -3   1 -12   16.80    3.90
  -3   1 -12   -1.90   22.60
   3   1  12    6.10    4.70
   3  -1  12    7.40    5.50
  -3  -1 -12    3.70    2.10
  -3  -1 -12  -19.10   20.70
  -3  -1 -12   10.80    5.10
  -3  -1 -12    6.40    3.70
   3  -1  12   37.50   19.60
  -3   1 -13    9.20    6.00
  -3   1 -13    7.40    4.00
   3   1  13   -0.50   23.50
   3   1  13    9.70    5.30
  -3   1 -13  -20.20   29.10
   3  -1  13   20.10   22.30
   3  -1  13    4.70    6.30
  -3  -1 -13    6.30    5.30
  -3  -1 -13  -51.99   26.20
  -3  -1 -13    1.90    2.20
  -3  -1 -13   14.90    4.10
   3   1  14  -12.70   24.90
  -3   1 -14    1.00    6.20
  -3   1 -14  -21.80   28.20
   3   1  14    3.50    5.80
   3  -1  14  -17.20   24.50
  -3  -1 -14    5.60    4.30
  -3  -1 -14  -44.00   26.50
  -3  -1 -14   10.90    5.80
   3  -1  14   11.60    6.60
  -3   1 -15   12.60    5.00
  -3   1 -15   14.70    6.80
   3   1  15   18.10    6.30
  -3  -1 -15   17.10    4.70
  -3  -1 -15   15.70    6.10
   3  -1  15   15.70    7.00
  -3   1 -16    2.10    7.10
  -3   1 -16    5.20    4.90
   3   1  16   16.20    6.70
   3  -1  16   14.40    7.60
  -3  -1 -16    7.40    6.60
  -3   1 -17    5.00    5.60
   3   1  17  -12.60    7.00
  -3   1 -17   10.50    7.80
   3  -1  17    3.40    8.70
  -3  -1 -17    1.50    7.00
   3   1  18   12.60    7.50
  -3   1 -18    3.70    5.90
  -3  -1 -18   -3.10    7.50
   3  -1  18    0.50    8.90
   3   1  19  -12.90    7.80
  -3  -1 -19   -6.00    8.10
   3  -1  19    2.90    9.30
  -3  -2  19   14.60   10.10
   3  -2 -19   21.70    8.00
  -3   2  18   34.70    7.00
  -3  -2  18   44.70    9.80
   3  -2 -18   45.80    7.80
  -3   2  17   65.89    8.00
   3   2 -17   79.99    9.60
  -3  -2  17   67.19    9.60
   3  -2 -17   60.69    7.70
  -3   2  16   88.09    7.90
   3   2 -16   93.09   12.50
  -3  -2  16   77.59    8.90
   3  -2 -16   79.09    7.40
   3   2 -15  233.78   42.50
   3   2 -15  156.68    6.30
  -3   2  15  154.08   26.30
  -3   2  15  172.68    8.50
   3   2 -15  157.58   12.40
  -3  -2  15  166.78   11.60
   3  -2 -15  168.88    6.80
   3  -2 -15  165.88   31.10
  -3  -2  15  115.09   26.70
   3  -2 -15  166.18   10.10
   3   2 -14  110.29   30.40
   3   2 -14   56.59    7.60
  -3   2  14   63.69    6.70
   3   2 -14   56.19    4.10
  -3   2  14  102.29   21.70
  -3  -2  14   47.00    7.40
   3  -2 -14   50.99    6.50
   3  -2 -14   68.89   24.70
   3  -2 -14   77.49    5.10
   3  -2 -14   64.09    5.30
  -3   2  13   40.50   17.80
   3   2 -13   33.60   24.60
  -3   2  13   32.80    4.30
   3   2 -13   30.30    3.40
   3   2 -13   32.70    6.70
  -3  -2  13   12.10   18.50
  -3  -2  13   33.90    7.00
   3  -2 -13   67.79   19.80
   3  -2 -13   36.30    3.30
   3  -2 -13   34.50    3.40
  -3   2  12  311.67    9.80
   3   2 -12  301.47    8.20
  -3   2  12  284.17   25.40
   3   2 -12  335.67   32.80
   3   2 -12  298.87   12.30
   3  -2 -12  309.07    9.10
   3  -2 -12  316.47    9.30
  -3  -2  12  319.97   26.50
   3  -2 -12  304.47   11.10
  -3  -2  12  290.47   12.20
   3  -2 -12  321.27   27.80
   3   2 -11   31.60   19.10
   3   2 -11    0.60    1.70
  -3   2  11   10.00    3.20
  -3   2  11    0.40   13.40
   3   2 -11    0.60    5.20
   3  -2 -11    3.20    2.60
   3  -2 -11    2.70    4.30
  -3  -2  11    8.40   14.60
   3  -2 -11   -2.10   13.40
  -3  -2  11    0.00    5.30
   3  -2 -11    5.60    2.70
   3   2 -10  554.64   32.20
  -3   2  10  545.25   14.10
  -3   2  10  495.85   27.00
   3   2 -10  549.74   13.40
   3   2 -10  547.55   16.40
   3  -2 -10  526.15   27.70
   3  -2 -10  550.94   14.20
   3  -2 -10  532.45   15.20
   3  -2 -10  552.94   14.10
  -3  -2  10  534.85   15.50
  -3  -2  10  575.54   28.80
  -3   2   9   37.40    3.60
  -3   2   9   38.30   11.40
   3   2  -9   31.20    4.90
  -3  -2   9   35.80   12.90
   3  -2  -9   27.00    3.60
   3  -2  -9   32.00    2.80
   3  -2  -9   26.20    3.50
  -3  -2   9   24.80    4.30
   3  -2  -9   26.70   12.00
  -3   2   8  426.96   22.50
  -3   2   8  416.26   11.10
   3   2  -8  444.16   13.40
  -3  -2   8  429.96   12.60
   3  -2  -8  429.26   11.40
   3  -2  -8  429.06   12.10
  -3  -2   8  439.66   10.70
   3  -2  -8  432.96   11.20
   3  -2  -8  427.46   11.00
   3  -2  -8  409.36   21.10
  -3  -2   8  435.66   24.50
   3   2  -7  225.28    8.70
  -3   2   7  203.78   16.30
  -3   2   7  232.38    6.20
   3  -2  -7  226.18    6.70
   3  -2  -7  225.98    7.40
  -3  -2   7  191.38   19.70
   3  -2  -7  233.38   15.30
   3  -2  -7  228.58    6.70
  -3  -2   7  219.98    8.00
   3  -2  -7  227.58    6.30
  -3  -2   7  228.48   18.60
  -3  -2   7  233.88    6.00
   3   2  -6 1604.54   41.20
  -3   2   6 1671.53   39.90
  -3   2   6 1708.73   49.70
   3  -2  -6 1655.83   40.60
  -3  -2   6 1631.64   52.49
   3  -2  -6 1657.73   40.20
  -3  -2   6 1712.23   51.79
  -3  -2   6 1678.83   39.90
   3  -2  -6 1593.34   40.00
  -3  -2   6 1673.33   40.70
   3  -2  -6 1688.93   47.90
   3  -2  -6 1674.03   40.30
  -3   2   5  388.96    9.40
  -3   2   5  383.36    9.80
  -3   2   5  366.96   18.10
   3  -2  -5  395.46   17.20
   3  -2  -5  376.36   10.30
  -3  -2   5  353.06   20.90
  -3  -2   5  385.06    9.60
   3  -2  -5  377.76    9.60
  -3  -2   5  373.46   19.90
   3  -2  -5  374.76   10.00
  -3  -2   5  379.36   10.50
   3   2  -4 1695.23   51.09
  -3   2   4 1662.73   40.80
  -3   2   4 1698.13   48.60
   3  -2  -4 1616.94   40.70
   3  -2  -4 1688.83   40.90
  -3  -2   4 1725.33   40.70
  -3  -2   4 1715.43   51.79
   3  -2  -4 1720.53   48.10
  -3  -2   4 1702.53   41.10
  -3   2   3   19.80    2.40
   3   2  -3   11.80    7.90
   3   2  -3   14.20    2.70
  -3   2   3   10.70    6.60
  -3   2   3   14.30    2.20
  -3  -2   3   26.60    8.70
   3  -2  -3    9.00    7.30
   3  -2  -3   13.20    1.90
  -3  -2   3   19.90    2.10
  -3  -2   3   12.90    2.00
  -3   2   2  800.32   19.40
   3   2  -2  801.82   30.00
   3   2  -2  780.92   19.80
  -3   2   2  775.92   19.30
  -3   2   2  751.12   25.60
   3  -2  -2  797.12   19.00
  -3  -2   2  790.12   19.40
  -3  -2   2  779.32   19.30
   3  -2  -2  764.62   19.20
   3  -2  -2  775.22   27.10
  -3  -2   2  791.32   29.80
   3   2  -1  124.49   13.90
  -3   2   1  138.09    4.30
  -3   2   1  142.19    4.70
   3   2  -1  145.19    5.00
  -3  -2   1  139.79    4.00
   3  -2  -1  146.69    4.10
   3  -2  -1  132.29   10.40
  -3  -2   1  142.39    4.40
  -3  -2   1  143.39    4.50
  -3  -2   1  139.29   12.90
   3  -2  -1  142.29   12.20
  -3   2   0  731.33   17.60
  -3   2   0  719.43   18.00
   3   2   0  710.83   28.60
   3   2   0  706.13   17.90
  -3  -2   0  701.53   28.40
   3  -2   0  681.43   24.70
  -3  -2   0  691.03   17.70
   3  -2   0  754.02   17.60
  -3  -2   0  719.73   17.60
  -3  -2   0  719.93   17.60
  -3   2  -1 1216.18   38.00
   3   2   1 1167.18   29.20
  -3   2  -1 1202.48   29.00
   3   2   1 1192.98   39.60
  -3   2  -1 1192.78   29.60
  -3  -2  -1 1169.48   29.20
  -3  -2  -1 1240.98   40.80
  -3  -2  -1 1164.28   29.30
   3  -2   1 1214.68   29.20
   3  -2   1 1207.68   38.10
  -3  -2  -1 1229.68   29.00
  -3   2  -2 1376.36   33.20
  -3   2  -2 1406.46   33.90
  -3   2  -2 1387.76   43.40
   3   2   2 1350.96   44.10
  -3  -2  -2 1340.87   33.50
   3  -2   2 1379.16   33.50
  -3  -2  -2 1318.57   33.50
   3  -2   2 1413.96   43.00
  -3  -2  -2 1404.36   44.60
   3   2   3  607.94   16.20
  -3   2  -3  648.54   15.80
   3   2   3  667.23   15.80
   3   2   3  650.13   28.20
  -3   2  -3  667.73   15.80
  -3   2  -3  639.64   27.10
  -3  -2  -3  627.54   27.30
   3  -2   3  644.34   26.20
  -3  -2  -3  615.84   16.20
  -3  -2  -3  623.54   16.10
   3  -2   3  645.54   16.20
   3   2   4  419.46   10.50
  -3   2  -4  413.86   22.10
   3   2   4  413.46   10.60
  -3   2  -4  409.66   10.50
  -3   2  -4  423.96   11.90
   3   2   4  413.86   23.40
  -3  -2  -4  398.16   11.10
  -3  -2  -4  415.76   10.50
  -3  -2  -4  401.76   10.90
  -3  -2  -4  392.16   22.30
   3  -2   4  399.46   22.70
  -3   2  -5 1693.13   40.50
   3   2   5 1634.24   40.60
  -3   2  -5 1696.83   41.60
   3   2   5 1719.13   55.29
  -3   2  -5 1651.43   54.29
   3   2   5 1672.23   40.60
   3  -2   5 1698.33   41.10
  -3  -2  -5 1694.93   40.50
  -3  -2  -5 1663.83   40.80
  -3  -2  -5 1710.83   55.69
  -3  -2  -5 1661.63   41.10
   3  -2   5 1652.93   54.59
  -3   2  -6  436.96   25.80
   3   2   6  434.86   26.50
  -3   2  -6  442.66   11.20
   3   2   6  394.86   12.30
   3   2   6  428.56   11.30
  -3   2  -6  439.76   12.90
  -3  -2  -6  418.46   25.60
   3  -2   6  439.16   25.00
  -3  -2  -6  440.96   11.50
   3  -2   6  438.56   12.30
  -3  -2  -6  437.86   12.10
  -3  -2  -6  448.96   11.20
   3   2   7 1453.25   51.59
   3   2   7 1413.46   35.00
  -3   2  -7 1468.65   36.40
  -3   2  -7 1387.76   52.39
  -3   2  -7 1419.96   34.80
  -3  -2  -7 1430.86   35.10
  -3  -2  -7 1461.65   34.80
   3  -2   7 1468.55   35.80
  -3  -2  -7 1407.26   52.39
   3  -2   7 1438.06   51.29
  -3  -2  -7 1419.56   35.60
  -3   2  -8  389.36   12.50
   3   2   8  378.56   10.50
   3   2   8  349.96   25.90
  -3   2  -8  367.46   10.10
  -3   2  -8  383.46   28.20
   3  -2   8  388.06    9.70
  -3  -2  -8  382.46   10.30
  -3  -2  -8  375.56   10.00
   3  -2   8  369.96   11.80
   3  -2   8  389.26   26.30
  -3  -2  -8  363.06   29.40
  -3  -2  -8  373.36   11.40
  -3   2  -9  639.74   38.40
   3   2   9  669.03   17.40
  -3   2  -9  674.53   19.30
   3   2   9  730.23   37.80
  -3   2  -9  664.03   17.00
  -3  -2  -9  693.83   17.20
   3  -2   9  687.33   16.50
   3  -2   9  634.64   18.20
  -3  -2  -9  624.84   35.70
   3  -2   9  670.33   35.30
  -3  -2  -9  671.03   16.90
  -3  -2  -9  664.43   18.10
   3   2  10  256.97   26.10
  -3   2 -10  294.77   11.90
   3   2  10  273.57    9.10
  -3   2 -10  285.67    8.60
  -3   2 -10  291.47   33.40
  -3  -2 -10  309.87   33.10
   3  -2  10  260.57   12.50
  -3  -2 -10  288.37    8.50
  -3  -2 -10  275.47    8.20
  -3  -2 -10  293.27   10.80
   3  -2  10  262.87   30.20
  -3   2 -11  286.17   12.30
  -3   2 -11  295.77   36.40
   3   2  11  280.57    9.70
   3   2  11  351.76   32.80
  -3   2 -11  280.87    8.60
   3  -2  11  254.57   29.00
  -3  -2 -11  257.77   35.20
  -3  -2 -11  289.57   10.50
  -3  -2 -11  289.87    8.60
  -3  -2 -11  279.27    8.50
   3  -2  11  265.57   10.60
  -3   2 -12   66.49    5.50
  -3   2 -12   60.89   25.50
  -3   2 -12   68.79    9.20
   3   2  12  138.69   26.30
   3   2  12   78.19    7.00
  -3  -2 -12   49.50   26.90
  -3  -2 -12   70.49    5.20
  -3  -2 -12   66.39    5.00
  -3  -2 -12   75.09    6.80
   3  -2  12   50.49   25.00
   3  -2  12   70.19    7.20
   3   2  13   72.59   23.80
  -3   2 -13   49.10    7.40
  -3   2 -13   48.10    4.40
  -3   2 -13   80.19   29.40
   3   2  13   50.19    5.50
  -3  -2 -13   48.60    6.80
   3  -2  13   64.49   24.00
  -3  -2 -13  112.59   32.10
   3  -2  13   44.20    7.30
  -3  -2 -13   53.79    5.20
  -3  -2 -13   43.60    4.80
  -3   2 -14   16.20    4.30
   3   2  14   98.49   44.50
   3   2  14   14.30    5.30
  -3   2 -14  -24.70   31.20
  -3   2 -14   21.30    7.30
   3  -2  14   11.20    7.10
  -3  -2 -14   16.10    6.50
   3  -2  14   -3.30   30.40
  -3  -2 -14   16.00    3.70
  -3  -2 -14    7.80    3.00
  -3   2 -15    6.10    7.50
  -3   2 -15    6.20    7.60
   3  -2  15    4.60    7.80
  -3  -2 -15   11.60    6.30
  -3   2 -16    1.80    8.50
  -3   2 -16   -1.90    4.90
   3   2  16    1.00    6.00
   3  -2  16    1.90    8.00
  -3  -2 -16    6.00    7.20
  -3   2 -17   -2.70    5.20
   3   2  17    0.70    6.40
   3  -2  17   -0.70    9.10
  -3  -2 -17    1.20    7.60
   3  -2  18    8.60    9.70
  -3  -2 -18   -6.20    8.30
   3  -3 -19   -5.90    9.00
  -3  -3  19   -0.50   10.80
   3  -3 -18    0.20    8.40
  -3  -3  18   -2.60   10.30
  -3  -3  17   15.70    9.80
   3  -3 -17   19.80    7.80
  -3  -3  16   -1.70    8.90
   3  -3 -16   10.90    7.50
   3   3 -15   20.90    8.50
  -3   3  15   19.00    3.70
   3  -3 -15   16.90    7.10
   3  -3 -15   25.00    4.20
  -3  -3  15    9.60    8.50
  -3   3  14   10.90    3.30
  -3   3  14  -24.90   23.40
   3   3 -14    6.60    7.40
   3  -3 -14   16.40    4.00
   3  -3 -14  -15.80   23.60
   3  -3 -14   13.30    6.70
  -3  -3  14   -0.60    7.90
  -3  -3  14    1.70   23.80
  -3   3  13   55.49    4.60
  -3   3  13   31.70   20.80
   3   3 -13   60.49    7.80
  -3  -3  13   19.90   21.90
   3  -3 -13   57.59   21.80
   3  -3 -13   47.80    4.30
   3  -3 -13   51.89    6.20
  -3  -3  13   46.10    7.70
   3   3 -12    8.00    6.30
  -3   3  12   16.90    2.70
  -3   3  12  -17.20   18.50
  -3  -3  12   27.60   18.60
  -3  -3  12    0.10    6.60
   3  -3 -12   12.00    3.70
   3  -3 -12   -0.90   18.20
   3  -3 -12    8.70    5.70
   3   3 -11   79.99   10.30
  -3   3  11   84.69    4.10
  -3   3  11   90.29   18.70
  -3  -3  11   71.89    7.80
   3  -3 -11  100.79   19.80
   3  -3 -11   82.39   10.90
   3  -3 -11   92.89    5.80
  -3  -3  11   85.59   19.60
  -3   3  10    3.00    1.90
  -3   3  10   21.00   15.20
   3   3 -10   -1.30    5.50
   3  -3 -10    1.00    3.20
  -3  -3  10   -3.50    2.40
  -3  -3  10   -7.50   15.50
   3  -3 -10   -1.40   14.30
   3  -3 -10    0.20    4.60
  -3  -3  10    1.60    8.10
  -3   3   9   23.40    2.00
  -3   3   9   10.30   13.60
   3   3  -9   24.10    5.70
  -3  -3   9   22.70    5.20
   3  -3  -9   24.00    3.40
  -3  -3   9   35.10   16.20
   3  -3  -9   16.20   13.70
  -3  -3   9   31.90    2.70
   3  -3  -9   20.80    4.10
  -3   3   8   69.09   14.50
  -3   3   8   64.79    3.20
   3   3  -8   59.09    7.60
  -3  -3   8   64.29    5.90
   3  -3  -8   72.99    5.10
  -3  -3   8   74.89    3.30
   3  -3  -8   65.39    3.10
   3  -3  -8   65.49    5.30
   3  -3  -8   70.69    2.90
   3  -3  -8   62.59   14.50
   3   3  -7   -3.40    4.00
  -3   3   7    9.30   11.80
   3  -3  -7    7.60    1.70
   3  -3  -7    7.70    1.90
  -3  -3   7    5.70   18.80
  -3  -3   7    6.50    1.90
   3  -3  -7    6.90    2.80
   3  -3  -7    6.30   10.80
  -3  -3   7    2.60    3.50
   3  -3  -7   -1.70    3.20
  -3   3   6   -0.60   11.00
  -3   3   6    5.60    1.90
   3   3  -6   -3.00    3.90
   3  -3  -6    4.80    1.70
   3  -3  -6    0.50    2.90
   3  -3  -6    3.90    2.50
  -3  -3   6   -8.50   12.50
   3  -3  -6   13.90   10.40
  -3  -3   6   -4.20    3.30
  -3  -3   6    3.70    2.00
  -3   3   5  142.19   17.00
  -3   3   5  156.68    4.80
   3   3  -5  135.19    7.30
   3  -3  -5  123.59   16.70
  -3  -3   5  146.89    5.10
  -3  -3   5  147.59    5.80
   3  -3  -5  143.99    5.50
   3  -3  -5  144.19    5.30
  -3  -3   5  168.48   18.80
   3  -3  -5  148.39    4.80
  -3   3   4   30.70   10.80
   3   3  -4   23.30    3.80
  -3   3   4   30.40    2.90
   3   3  -4   24.50   10.70
   3  -3  -4   22.80    2.50
  -3  -3   4   28.20   13.50
  -3  -3   4   23.40    2.40
  -3  -3   4   22.90    3.10
   3  -3  -4   16.20   11.10
   3   3  -3  507.15   27.30
   3   3  -3  520.25   14.70
  -3   3   3  531.65   13.70
  -3   3   3  537.25   13.60
  -3   3   3  518.05   24.40
  -3  -3   3  544.55   28.30
  -3  -3   3  527.75   13.80
   3  -3  -3  551.24   13.00
  -3  -3   3  515.55   13.10
   3  -3  -3  540.75   13.80
   3  -3  -3  538.55   26.60
  -3  -3   3  513.85   13.70
   3   3  -2    7.20   11.20
  -3   3   2   21.70    2.70
  -3   3   2   21.20   13.80
   3   3  -2   22.10    3.40
  -3   3   2   19.50    2.60
   3  -3  -2   19.90    2.50
  -3  -3   2   18.70    2.50
   3  -3  -2   20.90    1.70
   3  -3  -2   17.20   10.60
  -3  -3   2   17.10    2.50
  -3  -3   2   20.40    1.80
  -3  -3   2   22.60   12.40
   3   3  -1 1191.18   44.40
   3   3  -1 1124.79   29.40
  -3   3   1 1211.28   29.20
  -3   3   1 1177.18   28.80
   3  -3  -1 1156.08   42.50
  -3  -3   1 1191.88   28.80
  -3  -3   1 1175.48   29.10
   3  -3  -1 1171.18   28.90
   3  -3  -1 1221.78   28.60
  -3  -3   1 1172.68   28.70
  -3  -3   1 1163.58   43.40
   3   3   0   14.30   12.10
  -3   3   0   30.20    2.50
  -3   3   0   26.00    3.20
   3   3   0   28.70    3.90
   3  -3   0   28.40    2.70
   3  -3   0   30.90   10.90
  -3  -3   0   30.80    2.90
   3  -3   0   27.40    2.50
  -3  -3   0   35.90   12.80
   3  -3   0   30.20    9.30
  -3  -3   0   27.80    2.40
  -3  -3   0   24.00    2.70
   3   3   1 3090.09   78.19
  -3   3  -1 3240.58   77.89
  -3   3  -1 3092.79   78.59
   3   3   1 3373.46   94.49
   3  -3   1 3407.36   91.69
  -3  -3  -1 3201.88   78.09
   3  -3   1 3276.77   77.99
  -3  -3  -1 3382.36   94.69
   3  -3   1 3188.18   77.99
  -3  -3  -1 3274.37   77.79
  -3  -3  -1 3201.98   78.29
   3  -3   1 3269.37   90.19
  -3   3  -2  547.75   13.80
  -3   3  -2  551.24   15.10
   3   3   2  537.05   27.80
   3   3   2  537.45   14.20
  -3  -3  -2  547.25   30.20
   3  -3   2  534.15   25.80
   3  -3   2  567.24   14.30
  -3  -3  -2  544.75   13.70
  -3  -3  -2  568.14   14.50
  -3  -3  -2  562.84   14.60
   3  -3   2  544.45   14.00
   3   3   3 1437.56   36.20
   3   3   3 1481.45   51.49
  -3   3  -3 1473.05   49.90
  -3   3  -3 1459.65   36.00
  -3   3  -3 1509.65   37.20
  -3  -3  -3 1518.35   52.29
  -3  -3  -3 1507.65   36.70
  -3  -3  -3 1490.85   36.60
   3  -3   3 1512.15   36.20
   3  -3   3 1496.95   49.90
   3  -3   3 1493.55   36.50
   3   3   4    1.50   12.50
  -3   3  -4   13.60   12.90
  -3   3  -4   -7.70    3.90
   3   3   4    3.10    1.90
  -3   3  -4   -2.80    1.80
   3   3   4   -0.90    1.70
  -3  -3  -4   -1.50    2.80
   3  -3   4   -3.90    3.00
  -3  -3  -4   -2.10    2.90
  -3  -3  -4  -11.10   11.30
   3  -3   4    2.90    2.00
   3  -3   4   -9.00   10.80
   3   3   5  691.13   17.60
  -3   3  -5  721.03   33.90
   3   3   5  675.93   17.60
   3   3   5  706.23   33.70
   3   3   5  709.93   17.60
  -3   3  -5  719.53   17.70
  -3   3  -5  702.53   19.30
  -3  -3  -5  718.93   18.60
  -3  -3  -5  720.03   34.70
   3  -3   5  708.43   32.60
  -3  -3  -5  715.03   18.40
   3  -3   5  709.93   18.50
   3  -3   5  738.13   17.80
   3   3   6   68.09    3.60
  -3   3  -6   55.59    5.40
  -3   3  -6   60.99    3.60
   3   3   6   64.39    3.60
   3   3   6   67.79   16.20
  -3   3  -6   63.09   16.40
   3   3   6   67.79    3.30
   3  -3   6   62.89    5.90
   3  -3   6   44.20   15.30
  -3  -3  -6   59.99   17.30
   3  -3   6   65.99    3.90
  -3  -3  -6   56.69    5.40
  -3  -3  -6   65.19    5.10
   3   3   7   61.09   16.70
   3   3   7   49.70    3.80
  -3   3  -7   41.60   17.00
   3   3   7   57.59    3.20
   3   3   7   53.99    3.60
  -3   3  -7   52.39    3.70
  -3   3  -7   45.00    5.50
  -3  -3  -7   57.59    5.10
  -3  -3  -7   43.60   17.70
  -3  -3  -7   57.49    5.70
   3  -3   7   56.59    3.70
   3  -3   7   56.49    5.10
   3  -3   7   43.10   16.00
  -3   3  -8  344.87   12.70
   3   3   8  356.76   31.20
  -3   3  -8  302.77   28.80
   3   3   8  329.67    9.40
   3   3   8  319.97    9.00
  -3   3  -8  340.97    9.30
   3  -3   8  342.67    9.30
   3  -3   8  319.97   11.00
  -3  -3  -8  345.67   10.50
  -3  -3  -8  360.76   11.70
  -3  -3  -8  331.57   29.00
   3  -3   8  396.66   30.10
   3   3   9  -21.40   19.00
   3   3   9    1.00    2.90
  -3   3  -9   -3.90    5.70
  -3   3  -9   -1.20    2.70
  -3   3  -9   58.49   22.40
   3  -3   9    5.80    2.20
  -3  -3  -9    4.50    3.40
   3  -3   9   14.50   18.80
  -3  -3  -9    7.10    8.50
  -3  -3  -9    1.60   18.60
   3   3  10  199.38    7.30
  -3   3 -10  133.59   26.30
   3   3  10  210.28   31.60
  -3   3 -10  197.98    6.80
  -3   3 -10  201.88   11.10
  -3  -3 -10  200.08    8.00
   3  -3  10  222.08   28.40
   3  -3  10  192.08    9.30
  -3  -3 -10  214.48   10.40
  -3  -3 -10  219.88   30.10
   3  -3  10  200.38    6.20
   3   3  11   57.39    5.60
  -3   3 -11   49.70   27.20
  -3   3 -11   61.79    7.20
   3   3  11  110.59   25.60
  -3   3 -11   42.40    4.90
  -3  -3 -11   53.79    6.00
  -3  -3 -11   46.40   27.90
  -3  -3 -11   56.39    6.30
   3  -3  11   98.59   26.10
   3  -3  11   52.29    6.80
  -3   3 -12   94.89   32.60
   3   3  12  103.59    6.70
  -3   3 -12   99.49   10.70
  -3   3 -12   85.49    5.60
   3   3  12  156.08   27.70
   3  -3  12   90.89   10.30
  -3  -3 -12   91.59    6.80
  -3  -3 -12   87.39   28.10
   3  -3  12  101.59   28.50
  -3  -3 -12   94.69   10.00
  -3   3 -13    2.40    3.70
   3   3  13   14.00   29.70
   3   3  13    3.10    4.20
  -3   3 -13    4.30    7.60
  -3   3 -13  -13.20   29.50
   3  -3  13   40.30   26.50
  -3  -3 -13    7.60    7.30
   3  -3  13    0.30    7.40
  -3  -3 -13   15.90   32.60
  -3  -3 -13   -2.30    3.80
   3   3  14  160.28    8.30
  -3   3 -14  156.58    7.50
  -3   3 -14  173.58   13.00
   3  -3  14  166.78   12.50
  -3  -3 -14  179.48   12.00
  -3  -3 -14  142.09    7.80
   3   3  15   10.30    5.10
  -3   3 -15    0.80    4.50
   3  -3  15   12.40    8.40
  -3  -3 -15    5.50    7.00
  -3  -3 -15    5.40    4.90
   3  -3  16   21.00    9.00
  -3  -3 -16   13.20    7.50
   3  -3  17    9.80    9.60
  -3  -3 -17   -2.50    8.30
  -3  -3 -18   20.30    9.20
   3  -3  18   12.90   10.80
   3  -4 -18    4.00    9.40
  -3  -4  18   -2.30   11.20
   3  -4 -17   30.20    9.20
  -3  -4  17   16.90   10.70
   3  -4 -16    6.90    5.50
   3  -4 -16    3.80    8.20
  -3  -4  16  -10.00    9.60
   3  -4 -15   77.69    8.30
  -3  -4  15   70.59   10.00
   3  -4 -15   66.09    8.50
  -3   4  14   30.20   28.50
   3  -4 -14   27.30   34.20
   3  -4 -14   11.80    4.80
   3  -4 -14    2.90    7.20
  -3  -4  14    2.60    7.70
   3   4 -13  104.59   12.40
  -3   4  13   78.29   26.00
   3  -4 -13  114.19   28.20
   3  -4 -13  125.09    7.90
  -3  -4  13   90.29   31.90
   3  -4 -13  107.39   10.50
  -3  -4  13  105.49   11.80
  -3   4  12   66.99   23.30
   3   4 -12   93.49    9.10
   3  -4 -12  107.99   25.10
  -3  -4  12   94.29    8.80
   3  -4 -12   85.69    7.50
   3  -4 -12   88.99    7.40
   3   4 -11   45.80    7.30
  -3   4  11   45.00   21.30
  -3  -4  11   61.29    7.50
   3  -4 -11   50.39    4.70
  -3  -4  11   48.90    3.30
   3  -4 -11   81.99   21.80
   3  -4 -11   62.19    6.70
   3   4 -10  232.08   12.40
  -3   4  10  198.68   28.40
   3  -4 -10  235.38   10.20
   3  -4 -10  226.88    8.70
  -3  -4  10  230.78    6.90
  -3  -4  10  228.08   11.00
   3  -4 -10  244.18   28.70
  -3   4   9  120.79   22.00
   3   4  -9   95.79   10.00
  -3  -4   9  116.99    4.90
   3  -4  -9  119.49    7.00
  -3  -4   9   99.19    8.70
   3  -4  -9  134.09   21.80
   3   4  -8  760.92   21.80
  -3   4   8  768.92   38.20
   3  -4  -8  739.93   20.00
  -3  -4   8  704.23   39.30
   3  -4  -8  745.63   19.70
   3  -4  -8  766.02   37.00
  -3  -4   8  769.22   20.60
  -3  -4   8  723.13   18.90
   3   4  -7   94.09    7.80
  -3   4   7  106.09   19.40
  -3   4   7   97.89    4.10
  -3  -4   7   94.59    7.30
   3  -4  -7  125.69   18.90
   3  -4  -7   98.09    3.90
   3  -4  -7   91.29    6.10
   3  -4  -7   97.59    5.40
  -3  -4   7  110.89   21.50
  -3  -4   7   97.39    5.00
  -3   4   6 1131.99   45.50
   3   4  -6 1145.69   30.50
  -3   4   6 1147.19   28.30
  -3  -4   6 1193.68   71.59
  -3  -4   6 1126.79   28.70
   3  -4  -6 1179.98   29.10
  -3  -4   6 1204.58   29.40
   3  -4  -6 1146.79   29.30
  -3  -4   6 1132.09   48.70
   3  -4  -6 1176.18   46.40
  -3   4   5   76.09    4.20
  -3   4   5   32.20   15.50
   3   4  -5   67.89    7.50
   3  -4  -5   80.99    5.00
  -3  -4   5   68.89   19.40
  -3  -4   5   72.69    5.80
   3  -4  -5   73.39   17.70
  -3  -4   5   70.39    4.70
   3  -4  -5   64.89    4.80
  -3   4   4 1239.58   30.70
  -3   4   4 1223.18   46.90
   3   4  -4 1271.67   32.20
   3   4  -4 1252.17   49.20
   3  -4  -4 1167.58   48.50
  -3  -4   4 1268.67   31.10
  -3  -4   4 1280.17   30.20
   3  -4  -4 1240.08   31.00
  -3  -4   4 1275.97   51.79
   3  -4  -4 1216.48   31.00
  -3  -4   4 1273.77   31.00
   3   4  -3  313.17   11.00
   3   4  -3  288.57   27.10
  -3   4   3  331.77    9.60
   3  -4  -3  342.77    8.60
  -3  -4   3  336.77    9.90
  -3  -4   3  338.87    9.70
  -3  -4   3  334.67    8.80
   3  -4  -3  304.77   26.00
   3  -4  -3  329.97    9.60
  -3  -4   3  350.96   29.50
  -3   4   2  876.41   24.50
   3   4  -2  911.21   43.00
   3   4  -2  947.81   24.60
  -3  -4   2  937.61   23.60
  -3  -4   2  947.01   43.50
  -3  -4   2  978.10   23.30
   3  -4  -2  923.91   40.50
   3  -4  -2  979.10   23.10
   3  -4  -2  956.00   23.80
  -3  -4   2  950.60   23.90
  -3   4   1  457.75   12.10
  -3   4   1  459.15   12.90
   3   4  -1  463.15   29.50
  -3   4   1  405.36   26.50
   3   4  -1  438.16   13.10
   3  -4  -1  458.35   12.50
  -3  -4   1  423.96   28.70
  -3  -4   1  450.65   12.50
  -3  -4   1  465.75   12.00
   3  -4  -1  444.56   28.60
  -3  -4   1  450.75   11.90
   3  -4  -1  470.35   11.70
   3   4   0  127.39    6.50
   3   4   0  126.79   21.50
  -3   4   0  123.89    6.40
  -3   4   0  123.99    5.30
  -3  -4   0  134.79    4.80
   3  -4   0  122.39    5.70
   3  -4   0  143.39   18.60
  -3  -4   0  130.29    5.30
  -3  -4   0  133.29   20.70
   3  -4   0  132.99    5.00
  -3  -4   0  115.79    6.30
   3  -4   0  146.29   19.70
   3   4   1  222.68   25.40
  -3   4  -1  209.98    6.40
  -3   4  -1  213.78    8.30
   3  -4   1  182.98   19.00
   3  -4   1  226.08   23.40
  -3  -4  -1  211.18    6.30
  -3  -4  -1  204.08    6.80
   3  -4   1  197.28    6.80
  -3  -4  -1  210.88    7.90
  -3  -4  -1  230.58   26.60
   3  -4   1  213.78    6.80
  -3   4  -2    5.30    2.50
   3   4   2    6.90    3.00
  -3   4  -2   -1.70    4.00
   3   4   2  -20.90   12.80
  -3  -4  -2   -0.20    3.10
   3  -4   2  -17.90   11.10
   3  -4   2    1.40    2.70
  -3  -4  -2   21.60   17.40
   3  -4   2   11.70   14.20
  -3  -4  -2   -0.60    3.30
   3  -4   2   -0.50    2.90
  -3  -4  -2    6.00    2.00
   3   4   3  420.06   30.70
  -3   4  -3  412.16   12.90
  -3   4  -3  415.96   10.80
   3   4   3  386.66   11.30
  -3  -4  -3  403.76   11.60
  -3  -4  -3  390.46   10.40
   3  -4   3  416.66   11.60
   3  -4   3  407.06   27.50
   3  -4   3  404.76   11.20
   3  -4   3  407.56   26.40
  -3  -4  -3  410.96   12.10
  -3  -4  -3  373.46   29.30
  -3   4  -4  104.49    7.90
   3   4   4  122.59    5.30
  -3   4  -4  126.79    4.60
   3   4   4  123.99    4.30
   3   4   4  136.69   22.40
  -3  -4  -4  111.49    6.70
   3  -4   4  109.09    6.30
   3  -4   4  119.99   18.90
   3  -4   4   93.69   20.00
   3  -4   4  121.89    5.40
  -3  -4  -4  110.59    6.80
  -3  -4  -4  113.89   20.80
  -3   4  -5  412.46   10.80
   3   4   5  385.86   29.50
   3   4   5  382.66   10.90
  -3   4  -5  387.96   13.50
   3   4   5  395.16   10.40
  -3  -4  -5  432.26   31.20
   3  -4   5  419.26   12.30
  -3  -4  -5  413.16   12.30
  -3  -4  -5  426.46   12.60
   3  -4   5  380.86   27.80
   3  -4   5  407.56   11.30
   3   4   6   96.09    4.50
  -3   4  -6   75.19    8.60
   3   4   6   98.59    4.20
  -3   4  -6  129.39   24.00
   3   4   6   94.69    4.10
   3   4   6  109.49   19.70
  -3   4  -6  102.29    4.50
   3  -4   6   99.99    5.30
   3  -4   6  115.69   20.60
  -3  -4  -6   96.69    6.70
  -3  -4  -6   94.49    6.60
   3  -4   6   91.29    6.30
  -3  -4  -6   99.49   23.90
  -3   4  -7  351.76   31.10
  -3   4  -7  338.87   13.20
   3   4   7  331.77    9.00
   3   4   7  346.97    9.20
  -3   4  -7  344.77    9.40
   3   4   7  341.27   29.00
   3   4   7  324.07    8.90
   3  -4   7  334.97   11.30
   3  -4   7  357.76   10.10
  -3  -4  -7  300.67   30.70
  -3  -4  -7  345.67   10.70
  -3  -4  -7  360.56   11.50
   3  -4   7  360.46   29.50
   3   4   8  409.26   10.90
   3   4   8  429.16   32.50
  -3   4  -8  419.96   37.70
  -3   4  -8  392.86   15.00
  -3   4  -8  418.66   11.20
   3  -4   8  418.76   11.60
   3  -4   8  400.46   13.80
  -3  -4  -8  458.85   39.50
  -3  -4  -8  429.26   12.80
  -3  -4  -8  438.26   14.00
   3  -4   8  387.96   35.80
  -3   4  -9   -3.60    6.20
  -3   4  -9  -13.70   25.10
  -3   4  -9    2.70    2.80
   3   4   9   10.90    2.60
   3   4   9   30.60   23.30
   3  -4   9   -3.40    5.70
   3  -4   9    1.60    2.90
  -3  -4  -9    2.90   21.40
   3  -4   9  -29.40   18.50
  -3  -4  -9   11.00    4.30
  -3  -4  -9    4.20    5.30
  -3   4 -10   17.10    3.10
   3   4  10   23.60    2.90
   3   4  10   40.00   25.50
  -3   4 -10    4.80   24.70
  -3   4 -10   13.20    7.00
  -3  -4 -10   13.30    4.70
   3  -4  10   29.10   21.90
   3  -4  10   25.90    3.00
   3  -4  10    9.80    5.90
  -3  -4 -10   20.60    6.60
  -3  -4 -10   31.70   23.90
  -3   4 -11  109.49    5.60
   3   4  11  171.18   30.20
  -3   4 -11  106.39   11.80
   3   4  11  117.99    5.60
  -3   4 -11  124.89   31.70
  -3  -4 -11  123.49    8.30
   3  -4  11  124.59    5.10
   3  -4  11  110.19   26.30
  -3  -4 -11  118.79    9.40
   3  -4  11   97.69    9.30
  -3  -4 -11  153.98   33.80
   3   4  12   58.09   32.30
   3   4  12   24.60    3.50
  -3   4 -12   46.40   34.70
  -3   4 -12   16.60    3.50
  -3   4 -12   20.40    8.10
   3  -4  12   46.90   27.10
  -3  -4 -12   22.40   33.10
   3  -4  12   16.90    7.70
  -3  -4 -12   15.00    4.80
  -3  -4 -12   25.20    6.90
  -3   4 -13   51.19   41.10
   3   4  13   51.69    5.40
  -3   4 -13   50.79    5.20
  -3  -4 -13   60.49    8.60
  -3  -4 -13   52.19    5.50
   3  -4  13   47.20    8.70
   3  -4  13   51.39   32.90
  -3   4 -14   -1.00    3.80
   3  -4  14    6.30    8.60
  -3  -4 -14    3.30    8.50
  -3  -4 -14   -0.70    5.70
   3  -4  15   -2.70    9.40
  -3  -4 -15   -2.50    8.70
  -3  -4 -16    5.60    9.10
   3  -4  16   -2.40   10.20
   3  -4  17   10.60   10.70
  -3  -4 -17   17.50    9.60
   3  -5 -18   -6.20   10.10
  -3  -5  17   17.00   11.70
   3  -5 -17   17.90   10.10
   3  -5 -16    5.00    6.00
  -3  -5  16   -4.30   10.60
   3  -5 -16    6.90    9.10
  -3  -5  15    3.80   10.00
   3  -5 -15   10.50    5.90
   3  -5 -15    3.10    7.70
   3  -5 -14    8.30    7.30
   3  -5 -14   12.70    5.60
  -3  -5  14    8.20    9.50
  -3  -5  13    1.50    7.90
   3  -5 -13    0.80    5.00
   3  -5 -13   -6.30    7.60
  -3   5  12   42.90   28.00
   3  -5 -12   70.09   28.40
  -3  -5  12   32.00    2.80
   3  -5 -12   33.00    7.50
   3  -5 -12   39.00    5.60
  -3  -5  12   41.00    8.70
  -3  -5  12   71.19   30.70
  -3   5  11   61.29   26.20
   3   5 -11   24.00    8.30
   3  -5 -11   27.10    5.30
   3  -5 -11   56.39   25.30
  -3  -5  11   14.50    3.10
  -3  -5  11   22.70    7.80
   3  -5 -11   14.00    6.80
  -3  -5  11   26.20   27.20
   3   5 -10   22.50    7.60
  -3   5  10   31.00   23.90
   3  -5 -10   -0.80   22.20
   3  -5 -10   22.30    5.70
  -3  -5  10    3.20   25.40
  -3  -5  10   22.00    7.10
  -3  -5  10   15.90    3.40
  -3   5   9   46.40   22.50
   3   5  -9   34.80    7.60
  -3  -5   9   31.90    6.80
   3  -5  -9   29.90    4.80
   3  -5  -9   16.10   21.00
  -3  -5   9   29.60   21.40
   3  -5  -9   29.40    5.50
  -3  -5   9   31.50    3.70
  -3   5   8    1.40   20.40
   3   5  -8    5.40    6.80
   3  -5  -8  -29.60   19.00
  -3  -5   8    6.70    3.50
  -3  -5   8    4.10    5.30
   3  -5  -8   -0.30    4.80
  -3  -5   8   -2.30   20.00
   3  -5  -8    6.00    4.60
   3   5  -7    1.50    6.20
  -3   5   7   11.80    2.60
  -3   5   7   36.10   20.00
   3  -5  -7   -3.00   20.20
  -3  -5   7   -2.20    7.70
  -3  -5   7    6.90    3.60
   3  -5  -7    3.60    5.10
  -3  -5   7   10.30   19.30
   3  -5  -7    4.90    3.90
   3  -5  -7    7.50    3.90
  -3   5   6   18.40    3.00
  -3   5   6    0.60   17.70
   3   5  -6    9.40    5.50
   3  -5  -6   13.30    4.00
   3  -5  -6  -28.70   18.40
  -3  -5   6   21.30   20.40
   3  -5  -6   12.00    4.30
  -3  -5   6   11.20    3.80
  -3  -5   6   10.50    4.90
   3   5  -5    5.00    5.60
  -3   5   5   10.90    3.30
  -3   5   5   28.00   18.20
   3  -5  -5   10.80    4.10
   3  -5  -5   12.20    3.80
  -3  -5   5    5.20    3.60
   3  -5  -5   37.10   19.50
  -3  -5   5    7.30    2.00
  -3  -5   5   12.00    4.50
  -3   5   4  142.49    8.80
   3   5  -4  134.69    8.40
   3   5  -4  201.48   28.80
  -3  -5   4  155.08    7.30
   3  -5  -4  142.79    7.60
  -3  -5   4  149.88    5.20
   3  -5  -4  187.68   30.10
  -3  -5   4  158.88   26.20
   3  -5  -4  145.19    7.40
   3  -5  -4  159.78    4.60
  -3  -5   4  149.49    7.10
   3   5  -3   12.70    5.10
   3   5  -3   12.10   16.50
  -3   5   3   11.40    3.80
  -3   5   3  -28.00   18.80
  -3  -5   3    6.10   18.80
  -3  -5   3    9.70    2.70
  -3  -5   3    4.40    3.60
   3  -5  -3   11.20    3.60
   3  -5  -3    9.80    3.60
   3  -5  -3   11.10   18.40
  -3  -5   3    7.20    4.00
   3  -5  -3   12.10    2.10
   3   5  -2  198.38    9.20
   3   5  -2  215.38   29.70
  -3   5   2  211.38    8.20
  -3   5   2  172.48   23.80
  -3  -5   2  197.18    7.50
   3  -5  -2  197.78    7.10
   3  -5  -2  196.48   28.20
   3  -5  -2  207.68    6.30
  -3  -5   2  192.28    6.80
  -3  -5   2  174.78   26.40
  -3  -5   2  208.58    8.40
   3   5  -1   26.20   17.30
   3   5  -1    1.90    4.30
  -3   5   1  -24.20   13.90
  -3   5   1    2.10    3.90
  -3  -5   1    0.70    3.50
  -3  -5   1   -1.10    3.00
   3  -5  -1    6.80    2.60
  -3  -5   1   14.30   20.10
  -3  -5   1    1.00    3.00
   3  -5  -1    4.70   17.40
   3  -5  -1   -2.00    3.30
   3   5   0  208.38   27.30
  -3   5   0  240.48    7.70
   3   5   0  238.58    9.20
  -3   5   0  233.28    9.30
   3  -5   0  242.28    8.70
  -3  -5   0  242.78   32.70
  -3  -5   0  239.58    8.30
   3  -5   0  240.08    7.60
  -3  -5   0  234.58    9.30
   3  -5   0  226.78   28.70
  -3  -5   0  252.77    7.60
  -3   5  -1    1.10    4.60
  -3   5  -1   -0.10    3.30
   3   5   1   -0.20    3.90
   3   5   1  -13.70   17.10
  -3  -5  -1   -1.60    3.10
   3  -5   1    2.40    3.20
   3  -5   1   -2.80   16.40
  -3  -5  -1   19.90   18.70
   3  -5   1   10.70   15.10
   3  -5   1   -0.10    3.10
  -3  -5  -1   -1.60    4.10
  -3  -5  -1    2.20    2.50
   3   5   2  208.28    8.50
  -3   5  -2  224.78    7.30
   3   5   2  234.38   30.80
  -3   5  -2  218.98    9.90
   3  -5   2  262.77   27.60
  -3  -5  -2  203.28    8.50
   3  -5   2  227.98    7.80
   3  -5   2  200.68   27.30
  -3  -5  -2  256.07   30.10
  -3  -5  -2  220.08    8.50
  -3  -5  -2  219.38    6.80
   3  -5   2  224.28    7.80
  -3   5  -3   39.40    5.30
  -3   5  -3   45.80    4.30
   3   5   3   48.90    6.50
   3   5   3   53.09   19.60
   3  -5   3   47.00    4.40
   3  -5   3   46.40    4.30
  -3  -5  -3   43.70    4.50
  -3  -5  -3   39.20    3.50
   3  -5   3   39.10   19.10
   3  -5   3   80.09   18.70
  -3  -5  -3   42.80   21.20
  -3  -5  -3   43.00    5.00
   3   5   4   54.39    5.60
  -3   5  -4   57.09    6.50
  -3   5  -4   52.99    4.30
   3   5   4   36.40   21.40
   3  -5   4   54.89    4.40
  -3  -5  -4   55.19    6.10
   3  -5   4   51.09   19.00
   3  -5   4   55.49    5.10
  -3  -5  -4   57.89    5.40
   3  -5   4   74.59   20.60
  -3  -5  -4   66.99   23.10
   3   5   5   30.10   22.60
   3   5   5   44.40    5.00
   3   5   5   42.70    3.40
  -3   5  -5   44.20    3.50
  -3   5  -5   33.00    5.80
  -3  -5  -5   62.29   22.70
  -3  -5  -5   41.30    5.20
   3  -5   5   43.70   20.60
   3  -5   5   40.50    5.30
  -3  -5  -5   36.50    5.30
   3  -5   5   41.30   19.80
   3  -5   5   44.20    4.20
  -3   5  -6   -0.10    5.50
   3   5   6    8.70    2.10
   3   5   6   22.20   19.70
   3   5   6    3.50    2.80
  -3   5  -6    1.30    3.00
   3  -5   6  -12.00   18.10
   3  -5   6   -1.80    5.60
  -3  -5  -6    1.20    4.20
   3  -5   6   -6.20    3.70
   3  -5   6   24.10   23.80
  -3  -5  -6   14.10   23.70
   3   5   7  207.58    6.40
  -3   5  -7  211.08    7.10
   3   5   7  214.88    6.20
   3   5   7  223.38   33.10
  -3   5  -7  209.58   11.90
   3  -5   7  222.08   31.10
  -3  -5  -7  216.28   31.20
  -3  -5  -7  200.08    9.50
   3  -5   7  217.98   35.50
   3  -5   7  198.78    8.40
  -3  -5  -7  222.48    9.60
   3  -5   7  199.98    9.20
   3   5   8   64.89   25.30
  -3  -5  -8   21.10   27.10
  -3  -5  -8    6.20    6.30
   3  -5   8   35.30   22.50
  -3   5  -9   -8.00    7.50
   3   5   9   36.40   24.40
  -3   5  -9    1.10    3.10
   3  -5   9   11.40    6.70
   3  -5   9    3.20    3.70
  -3  -5  -9   -4.00    5.90
  -3  -5  -9  -21.00   25.40
  -3  -5  -9   11.80    5.10
   3   5  10  102.39   30.70
  -3   5 -10  102.69   12.70
  -3   5 -10  106.29    5.40
  -3  -5 -10  115.69    8.70
   3  -5  10   79.49   31.90
  -3  -5 -10  130.19   32.80
   3  -5  10  101.69   10.60
  -3  -5 -10  103.09   10.60
   3  -5  10  102.59    6.20
   3   5  11  122.89   33.50
  -3   5 -11   70.09    5.20
   3  -5  11   65.49    8.20
  -3  -5 -11   53.89    7.50
   3  -5  11  159.08   30.80
  -3  -5 -11   55.49    6.30
  -3  -5 -11   90.49   37.10
   3  -5  11   75.29    5.60
  -3   5 -12   94.69    5.90
  -3  -5 -12  120.29    9.80
   3  -5  12  131.19   34.60
  -3  -5 -12  102.99   10.50
   3  -5  12   94.89    9.40
  -3  -5 -13   66.19    9.50
  -3  -5 -13   64.49    6.70
   3  -5  13   48.50    8.40
  -3  -5 -14   63.79    9.90
   3  -5  14   45.50   10.10
  -3  -5 -14   44.30    6.40
  -3  -5 -15   22.70    6.30
   3  -5  15   43.10   11.00
  -3  -5 -15   37.70    9.90
   3  -5  16    7.10   10.60
  -3  -5 -16   21.90    9.50
  -3  -5 -17   -1.60   16.90
   3  -6 -17   -9.30   11.00
   3  -6 -16   -3.20   10.20
   3  -6 -16   18.50    6.90
  -3  -6  16   10.40   12.20
   3  -6 -15   35.60    9.80
   3  -6 -15   31.30    6.90
  -3  -6  15   31.00   11.40
   3  -6 -14   -8.40    7.90
  -3  -6  14   10.20    9.10
   3  -6 -14    4.60    6.40
   3  -6 -13  116.29    9.90
   3  -6 -13   98.79    9.90
  -3  -6  13   98.69   10.80
  -3  -6  12   -1.80    7.90
   3  -6 -12    1.70    6.00
   3  -6 -12    1.80    7.10
  -3  -6  12   -8.80    3.80
  -3   6  11  108.39   32.50
   3  -6 -11  134.69   11.40
  -3  -6  11  136.19   10.90
   3  -6 -11  141.69   35.50
   3  -6 -11  114.89    9.60
  -3  -6  11   94.39    6.90
  -3  -6  11   85.59   35.00
   3  -6 -10   -5.40   29.10
   3  -6 -10    4.30    6.20
   3  -6 -10    6.50    5.50
  -3  -6  10    1.70    4.20
  -3  -6  10  -22.90   29.50
  -3  -6  10   -5.00    6.70
   3   6  -9  354.66   16.40
  -3   6   9  413.66   42.60
   3  -6  -9  343.87   12.80
   3  -6  -9  329.97   40.40
  -3  -6   9  357.56   11.60
  -3  -6   9  440.16   45.10
  -3  -6   9  352.06   13.20
   3  -6  -9  318.57   12.70
  -3   6   8   73.59   27.20
   3   6  -8   56.69    8.10
  -3  -6   8   80.49    7.60
  -3  -6   8   80.09    7.00
  -3  -6   8  113.19   31.20
   3  -6  -8   63.59   27.60
   3  -6  -8   70.99    7.10
   3  -6  -8   69.99    6.40
   3   6  -7  339.17   15.00
  -3   6   7  378.46   38.30
  -3   6   7  320.67    9.80
   3  -6  -7  318.87   11.90
  -3  -6   7  326.97   11.10
   3  -6  -7  373.86   40.70
   3  -6  -7  337.57   12.40
  -3  -6   7  362.56   42.30
  -3  -6   7  350.16   12.80
  -3   6   6    5.90    3.80
   3   6  -6    2.80    6.50
  -3   6   6   39.90   23.70
   3  -6  -6    0.40    5.50
  -3  -6   6    8.30   22.70
   3  -6  -6    3.40    4.70
   3  -6  -6   16.60   25.00
  -3  -6   6   13.90    4.70
  -3  -6   6    8.80    5.70
  -3  -6   6    1.90    2.10
  -3   6   5 1288.87   32.30
   3   6  -5 1303.87   34.50
  -3  -6   5 1288.07   32.70
  -3  -6   5 1279.47   31.40
   3  -6  -5 1234.58   32.70
  -3  -6   5 1337.27   32.80
   3  -6  -5 1264.07   33.10
  -3   6   4   16.30    4.50
   3   6  -4   19.00    6.20
   3   6  -4   19.10   35.30
  -3  -6   4   12.70    4.80
   3  -6  -4    6.40    4.60
   3  -6  -4   32.00   23.80
  -3  -6   4   13.10    3.00
  -3  -6   4   20.40    4.50
   3  -6  -4   13.30    2.00
  -3   6   3  869.61   47.60
   3   6  -3  882.51   24.90
  -3   6   3  866.61   23.30
   3   6  -3  848.62   50.39
  -3  -6   3  887.41   22.80
  -3  -6   3  971.60   79.89
  -3  -6   3  872.81   23.20
   3  -6  -3  870.31   47.70
   3  -6  -3  846.32   21.60
  -3  -6   3  883.41   22.10
   3  -6  -3  868.21   23.10
   3   6  -2   64.99   25.30
  -3   6   2   76.29    7.70
   3   6  -2   81.89    8.70
  -3   6   2   54.79   23.30
   3  -6  -2   67.79    4.50
   3  -6  -2   72.09    6.70
  -3  -6   2   76.39    6.40
   3  -6  -2   53.19    6.00
  -3  -6   2   50.49   29.00
  -3  -6   2   70.79    5.50
  -3  -6   2   66.59    6.80
   3  -6  -2   65.89   24.60
   3   6  -1  655.93   19.50
  -3   6   1  688.53   19.00
  -3   6   1  619.44   38.80
   3   6  -1  645.24   47.50
   3  -6  -1  653.63   17.50
   3  -6  -1  658.63   43.90
   3  -6  -1  650.63   18.50
  -3  -6   1  660.63   18.90
  -3  -6   1  657.33   17.50
  -3  -6   1  660.13   49.80
   3  -6  -1  664.23   17.00
  -3  -6   1  646.74   17.30
  -3   6   0    6.10    5.10
   3   6   0  -33.50   21.10
   3   6   0    1.80    5.10
   3  -6   0    5.60    3.40
   3  -6   0    0.80    4.10
  -3  -6   0   18.20   24.10
  -3  -6   0   -0.50    4.60
   3  -6   0   50.79   22.80
  -3  -6   0    9.10    4.20
  -3  -6   0   12.90    3.30
   3   6   1  102.99    8.40
  -3   6  -1  124.89    9.30
   3   6   1  113.79   26.50
   3  -6   1  123.79   25.50
   3  -6   1  118.49    6.20
  -3  -6  -1  120.29    7.80
   3  -6   1  117.69    7.90
  -3  -6  -1  127.69    5.60
  -3  -6  -1  127.59   28.70
   3  -6   1  127.49   32.30
  -3  -6  -1  117.09    7.30
  -3   6  -2   17.40    6.20
   3   6   2   -8.70   20.90
   3   6   2   10.10    4.90
  -3  -6  -2   10.00    2.90
  -3  -6  -2    9.10    4.80
   3  -6   2    3.70    4.10
  -3  -6  -2    1.10   23.60
   3  -6   2   15.80   23.90
   3  -6   2    6.80    4.20
   3  -6   2    2.90   20.70
  -3   6  -3   54.89    5.80
   3   6   3   93.79   24.70
  -3   6  -3   61.79    7.30
   3   6   3   62.19    7.20
   3  -6   3   72.29   26.70
   3  -6   3   68.19   25.20
  -3  -6  -3   39.70    5.60
  -3  -6  -3   48.30    4.10
   3  -6   3   43.20    5.10
  -3  -6  -3   15.50   24.50
  -3  -6  -3   57.09    5.90
   3  -6   3   56.19    5.40
   3   6   4   13.40    4.50
  -3   6  -4   16.80    3.80
   3   6   4   64.79   26.70
  -3   6  -4   19.10    6.70
  -3  -6  -4   56.29   27.20
   3  -6   4   55.19   26.70
   3  -6   4   12.30    4.90
   3  -6   4   14.80    4.70
   3  -6   4  -14.20   24.80
  -3  -6  -4   13.80    5.50
   3   6   5    8.90    5.90
   3   6   5   15.90    2.40
  -3   6  -5    8.70    7.10
  -3   6  -5   16.20    3.70
   3   6   5   37.00   25.80
  -3  -6  -5   10.70    5.30
  -3  -6  -5   -0.20    5.60
   3  -6   5   46.90   26.10
  -3  -6  -5   -0.40   25.30
   3  -6   5    9.60    4.60
   3  -6   5  -42.00   25.90
   3  -6   5    6.00    6.30
   3   6   6   68.49   24.60
  -3   6  -6   43.90    8.10
  -3   6  -6   43.70    4.00
   3   6   6   42.50    5.60
   3  -6   6   48.40    6.40
  -3  -6  -6   54.69   30.40
   3  -6   6    5.30   26.50
  -3  -6  -6   29.00    5.50
   3  -6   6   36.00    5.00
  -3  -6  -6   38.40    6.10
   3  -6   6    7.40   30.70
   3   6   7    7.40   25.40
  -3   6  -7    1.40    7.60
   3   6   7    7.50    3.80
   3   6   7   13.70    2.90
  -3   6  -7    6.20    3.50
  -3  -6  -7    3.80    6.60
   3  -6   7    7.40    6.20
   3  -6   7   28.40   31.10
  -3  -6  -7    7.80   27.60
  -3  -6  -7    5.60    5.80
   3  -6   7    3.70    4.60
  -3   6  -8   61.49    5.40
   3   6   8   57.89   27.80
  -3   6  -8   50.59    8.60
   3  -6   8   60.79    5.30
   3  -6   8   69.09    7.50
  -3  -6  -8   67.29    7.20
   3  -6   8   78.39   31.80
  -3  -6  -8   58.49    6.00
  -3  -6  -8  100.09   32.50
   3   6   9   45.40   31.70
  -3   6  -9    1.20    3.50
   3  -6   9    0.10    4.50
  -3  -6  -9    3.20    6.70
  -3  -6  -9    0.50    5.70
   3  -6   9   -5.70    7.00
  -3  -6  -9  -15.50   34.90
   3  -6   9   23.00   31.10
   3   6  10   75.29   30.50
  -3   6 -10   45.40    5.20
   3  -6  10   44.20    8.30
   3  -6  10   66.79    7.00
   3  -6  10   30.90   38.80
  -3  -6 -10   38.40    8.20
  -3  -6 -10   49.40    6.50
  -3  -6 -10   63.19   39.70
  -3   6 -11   -4.30    4.50
  -3  -6 -11    4.60    7.40
   3  -6  11   -8.30   40.80
  -3  -6 -11    4.50    5.90
   3  -6  11    2.50    7.40
   3  -6  11    4.10    4.30
  -3  -6 -12   33.10    6.60
   3  -6  12   13.40    9.00
  -3  -6 -12   41.40    8.40
  -3  -6 -13   10.70    6.90
   3  -6  13   -2.20    9.80
  -3  -6 -13   11.80    9.50
  -3  -6 -14   16.20    9.10
   3  -6  14    0.50   10.00
  -3  -6 -14    0.20    7.00
   3  -6  15    9.10   11.10
  -3  -6 -15   11.20    9.50
  -3  -6 -15   -4.00    7.00
  -3  -6 -16  -10.60    8.00
   3  -7 -16   13.80    7.80
  -3  -7  15    9.10   12.40
   3  -7 -15    9.10    9.60
   3  -7 -15    7.50    7.50
  -3  -7  14   -8.40   11.40
   3  -7 -14    7.70    7.30
   3  -7 -14  -10.00    9.80
  -3  -7  13    0.70   10.50
   3  -7 -13   10.80    7.30
   3  -7 -13    1.30    9.60
  -3  -7  12   -0.60    8.80
   3  -7 -12   -1.00    6.70
   3  -7 -12    0.10    7.90
   3  -7 -11   -1.30    6.50
  -3  -7  11    0.00    5.10
  -3  -7  11  -12.50    8.90
   3  -7 -11    1.70    8.30
  -3  -7  10    3.80    7.70
   3  -7 -10   10.40    7.20
   3  -7 -10   12.50    6.80
  -3  -7  10   12.10    5.30
  -3   7   9    6.90   36.80
  -3  -7   9   -1.00    7.80
   3  -7  -9    8.70    6.60
   3  -7  -9    3.10   40.80
  -3  -7   9    9.40    5.40
   3  -7  -9    4.60    6.60
  -3  -7   9   10.90   38.10
  -3   7   8   55.29   33.10
  -3   7   8   25.70    3.30
   3  -7  -8   17.70    6.40
  -3  -7   8   78.79   36.60
  -3  -7   8   35.60    7.80
  -3  -7   8   34.90    7.10
   3  -7  -8   54.39   35.90
   3  -7  -8   22.70    7.40
   3   7  -7   13.70    8.30
  -3   7   7    3.60   32.00
  -3   7   7    7.00    4.10
  -3  -7   7   -8.80   34.20
  -3  -7   7    0.70    6.80
   3  -7  -7   -0.60    5.50
  -3  -7   7   10.90    8.80
   3  -7  -7   13.10    6.70
   3  -7  -7   45.20   34.20
  -3   7   6   11.80    4.60
   3   7  -6   11.60    7.70
   3  -7  -6   11.40    6.30
  -3  -7   6    8.90    2.70
  -3  -7   6   45.10   32.00
   3  -7  -6   11.00   53.79
  -3  -7   6   11.40    6.10
   3  -7  -6   19.10    6.00
  -3  -7   6   11.70    5.70
  -3   7   5    6.70    4.90
   3   7  -5   -5.20    7.00
  -3   7   5  -20.30   27.60
   3  -7  -5   -3.40    5.30
  -3  -7   5   -7.70    5.40
  -3  -7   5  -12.00    5.50
  -3  -7   5   -3.00    3.10
   3  -7  -5   29.70   30.30
   3  -7  -5   -5.50    5.30
  -3   7   4   55.49   28.10
   3   7  -4   64.79    8.20
  -3   7   4   63.19    7.90
   3  -7  -4   53.39    3.60
   3  -7  -4   38.90    5.90
  -3  -7   4   47.60    6.90
   3  -7  -4   63.09   29.00
  -3  -7   4   42.00    6.20
   3  -7  -4   53.39    6.50
  -3  -7   4   54.89    5.50
   3   7  -3   28.80    7.30
  -3   7   3   49.20    5.90
  -3   7   3   62.19   27.80
  -3  -7   3   39.10    5.30
  -3  -7   3   36.10    5.70
   3  -7  -3   33.50    5.80
   3  -7  -3   40.40    4.10
  -3  -7   3   39.20    4.40
   3  -7  -3   52.29   25.70
   3  -7  -3   42.70    6.10
  -3   7   2  -21.50   25.30
   3   7  -2   -8.40   31.10
   3   7  -2    0.60    6.50
  -3   7   2    0.20    5.80
  -3  -7   2   -1.50    4.50
   3  -7  -2    2.30    3.00
   3  -7  -2    1.70    5.20
   3  -7  -2   28.40   29.10
  -3  -7   2   -8.90    5.80
  -3  -7   2   -1.70    4.30
   3  -7  -2   -4.60    5.80
   3   7  -1  125.89   10.30
  -3   7   1  139.29   29.10
  -3   7   1  144.89   10.20
   3   7  -1  109.29   32.40
   3  -7  -1  123.49    8.50
   3  -7  -1  151.28   32.40
   3  -7  -1  144.59    6.50
  -3  -7   1  126.09    7.40
  -3  -7   1  119.39   10.00
  -3  -7   1  122.69    7.20
  -3   7   0   12.10    6.20
   3   7   0  -17.90   27.40
   3   7   0    7.70    6.20
   3  -7   0   18.20    3.80
  -3  -7   0   46.40   32.70
  -3  -7   0    3.70    3.70
  -3  -7   0    2.70    4.70
   3  -7   0   12.50    5.80
   3  -7   0   80.89   29.90
   3  -7   0    6.50    4.30
  -3  -7   0    3.50    6.20
  -3   7  -1   43.00    7.20
   3   7   1   41.40    6.50
   3   7   1   56.69   28.90
  -3  -7  -1   64.89   35.70
   3  -7   1   34.20    6.00
  -3  -7  -1   30.50    5.50
  -3  -7  -1   42.70    4.00
   3  -7   1   41.20    4.60
   3  -7   1   42.30    4.90
  -3  -7  -1   32.30    6.60
   3  -7   1   81.19   31.90
   3   7   2   19.30   31.20
  -3   7  -2   27.70    7.50
   3   7   2   21.90    6.10
  -3  -7  -2   13.20    5.80
   3  -7   2   21.90    4.50
  -3  -7  -2   11.80    9.10
   3  -7   2   66.59   29.20
   3  -7   2   26.10    4.60
  -3  -7  -2   83.79   37.20
  -3  -7  -2   19.80    3.40
   3  -7   2   15.60    5.10
  -3   7  -3   33.80    8.10
   3   7   3   23.20   26.70
   3   7   3   24.00    5.80
   3  -7   3   36.00   29.50
   3  -7   3   28.10    5.40
  -3  -7  -3   16.70    6.10
   3  -7   3   15.40    5.80
  -3  -7  -3  -10.50   34.20
  -3  -7  -3   17.00    3.10
  -3  -7  -3   11.40    5.90
  -3   7  -4    3.80    7.50
   3   7   4  -30.30   30.70
   3   7   4    7.60    5.20
  -3  -7  -4    1.90    5.70
   3  -7   4   -5.70   28.40
  -3  -7  -4    0.50    6.30
  -3  -7  -4   64.49   36.90
   3  -7   4    6.00    5.30
   3  -7   4   -6.70    5.50
  -3   7  -5    7.90    8.30
   3   7   5  -17.50   31.30
   3   7   5    4.90    2.30
   3   7   5    4.30    4.90
  -3  -7  -5   -7.40    6.50
   3  -7   5  -11.20   31.40
   3  -7   5    8.80    5.80
   3  -7   5   -8.70    5.50
  -3  -7  -5    7.10    6.40
  -3  -7  -5   -0.10   37.20
  -3   7  -6    9.30    8.90
   3   7   6   41.20   34.30
   3  -7   6    8.30    6.00
  -3  -7  -6  -19.60   35.90
   3  -7   6    4.30    5.50
  -3  -7  -6   12.10    6.50
  -3  -7  -6    9.50    6.00
   3   7   7   87.89   35.50
   3   7   7   46.30    5.50
   3  -7   7   27.60    6.10
  -3  -7  -7   43.90   38.30
  -3  -7  -7   33.60    7.80
  -3  -7  -7   18.50    6.30
   3  -7   7   34.10    7.10
   3   7   8   11.20   37.10
  -3  -7  -8   -6.80    7.70
   3  -7   8   -3.10    7.30
  -3  -7  -8   17.10   42.00
  -3  -7  -8    0.60    6.80
   3  -7   8    4.80    8.70
  -3  -7  -9   67.39    8.30
   3  -7   9   58.39    8.40
  -3  -7  -9   63.09    7.50
   3  -7   9   56.99    7.70
  -3  -7 -10    1.90    6.50
  -3  -7 -10    7.00    7.80
   3  -7  10    3.10    5.50
   3  -7  10   -3.90    8.10
  -3  -7 -11   56.59    8.90
   3  -7  11   54.99    9.60
  -3  -7 -11   58.59    7.50
   3  -7  11   76.39    8.50
   3  -7  12  -13.80    9.70
  -3  -7 -12   -3.30    7.10
  -3  -7 -12   10.70    9.60
   3  -7  13   41.80   11.10
  -3  -7 -13   38.80    8.10
  -3  -7 -13   43.30    9.50
  -3  -7 -14   -6.40    7.60
   3  -7  14  -20.90   15.80
  -3  -7 -14    3.40   12.30
   3  -8 -14    3.10    8.40
   3  -8 -13   11.80   10.90
  -3  -8  13   10.70   11.20
   3  -8 -13   15.80    8.20
   3  -8 -12   23.80    8.40
  -3  -8  12   -0.50    9.90
   3  -8 -12    9.90   10.10
   3  -8 -11   26.40    7.90
   3  -8 -11   20.10    8.60
  -3  -8  11   15.00    9.50
  -3  -8  11   12.40    6.20
  -3  -8  10   26.00    6.50
   3  -8 -10   21.10    8.00
   3  -8 -10   29.20    8.30
  -3  -8  10   28.50    9.30
  -3  -8   9   63.89    6.90
   3  -8  -9   53.09    8.40
   3  -8  -9   58.99    8.50
  -3  -8   9   61.29    9.10
   3  -8  -8   53.19    7.80
  -3  -8   8   66.49    8.60
   3  -8  -8   55.39    8.00
  -3  -8   8   60.19    7.00
  -3   8   7   96.79    7.50
  -3  -8   7  101.69   10.90
  -3  -8   7   94.29   43.50
  -3  -8   7   91.39    9.80
   3  -8  -7   99.49   10.10
   3  -8  -7   85.49    8.50
  -3   8   6  104.79    8.70
   3  -8  -6   89.79    9.50
   3  -8  -6   61.69    7.30
  -3  -8   6   80.39    5.90
  -3  -8   6  105.39   10.40
  -3  -8   6   89.89   10.00
  -3  -8   6  137.39   41.20
  -3   8   5   58.29   35.90
   3  -8  -5   46.70    7.00
   3  -8  -5   62.49    7.20
  -3  -8   5   56.69    6.00
  -3  -8   5   90.59   10.20
   3  -8  -5  112.59   40.40
  -3  -8   5   61.39    7.00
   3   8  -4   79.69    9.60
  -3   8   4   84.49    9.50
  -3   8   4   69.89   35.40
   3  -8  -4   58.09    6.90
   3  -8  -4   84.39   40.60
  -3  -8   4   65.39    6.50
   3  -8  -4   47.40    7.00
  -3  -8   4   64.19    7.40
   3  -8  -4   67.59    5.20
  -3  -8   4   88.49    9.60
   3   8  -3  120.29   12.70
  -3   8   3  109.49   10.00
  -3   8   3  150.98   33.60
   3  -8  -3  102.29    9.80
  -3  -8   3   95.09    9.60
   3  -8  -3  111.29   39.30
  -3  -8   3  105.39    8.40
   3  -8  -3  100.59    5.50
   3  -8  -3   82.39    9.60
  -3  -8   3   98.19    7.40
  -3   8   2   28.50    7.10
   3   8  -2   18.50    8.00
  -3   8   2  -13.40   28.60
  -3  -8   2   18.40    4.90
   3  -8  -2   15.40    6.40
  -3  -8   2   19.20    7.10
   3  -8  -2   14.70    3.70
   3  -8  -2    5.10    6.80
   3  -8  -2   30.80   31.60
  -3   8   1  103.39   11.30
   3   8  -1  104.69   12.50
   3  -8  -1   78.19    8.70
   3  -8  -1  146.19   35.10
  -3  -8   1   87.39    8.20
  -3  -8   1   90.39    7.90
   3  -8  -1   73.49    7.70
   3  -8  -1   93.09    6.60
  -3  -8   1   91.29    7.30
  -3   8   0    1.20    7.60
   3   8   0    8.60    7.40
   3  -8   0   10.40    4.20
   3  -8   0    4.20    5.80
  -3  -8   0   -1.10    4.20
   3  -8   0   53.89   37.50
   3  -8   0    0.00    5.80
  -3  -8   0   -2.70    7.20
  -3  -8   0    6.20    6.30
   3   8   1   21.90   38.20
  -3   8  -1   29.60    8.30
   3   8   1   37.00    7.70
  -3  -8  -1   23.70    4.30
   3  -8   1   66.49   34.90
  -3  -8  -1   32.90    6.20
   3  -8   1   16.70    6.10
  -3  -8  -1   31.40    7.60
   3  -8   1   30.80    5.00
   3  -8   1   24.50    5.70
   3   8   2    8.80    7.20
  -3   8  -2    1.20    8.40
   3   8   2   33.20   37.00
   3  -8   2  -12.50    6.50
  -3  -8  -2   -5.60    3.60
   3  -8   2   -8.00    5.50
  -3  -8  -2  -28.10   40.90
   3  -8   2   24.70   35.40
   3  -8   2    4.90    5.30
  -3  -8  -2    7.50    6.50
  -3  -8  -2  -12.90    7.10
   3   8   3   19.90    6.90
   3   8   3  -26.60   35.10
  -3   8  -3   10.80    9.10
  -3  -8  -3  -18.00   46.80
  -3  -8  -3   11.10    6.80
   3  -8   3   13.10    5.60
  -3  -8  -3    0.00    6.50
   3  -8   3   -5.30    5.70
   3  -8   3   55.49   37.70
   3   8   4   22.50    6.60
   3   8   4  -13.10   39.50
  -3  -8  -4    2.20    7.50
   3  -8   4   13.00    5.10
   3  -8   4    4.70    6.10
  -3  -8  -4   63.19   49.40
   3  -8   4   36.40   46.60
  -3  -8  -4    5.90    7.10
   3  -8   4   -1.50    6.40
   3   8   5   15.70    5.90
   3   8   5   48.40   37.00
   3  -8   5   -2.40    6.20
  -3  -8  -5    6.50    6.80
  -3  -8  -5   -2.80    7.50
  -3  -8  -5   38.40   42.30
   3  -8   5   10.30    4.90
   3  -8   5   -3.90    6.20
   3   8   6   38.70   58.49
   3   8   6   19.30    5.30
   3  -8   6    1.10    6.30
   3  -8   6    1.50    4.50
  -3  -8  -6    5.70    7.80
   3  -8   6   -1.90    6.80
  -3  -8  -6    5.90   59.79
  -3  -8  -6   -5.60    7.00
   3  -8   7   -2.10    4.40
  -3  -8  -7    1.70    7.70
   3  -8   7   -9.90    7.00
  -3  -8  -7   13.90    7.50
   3  -8   7   -2.10    6.50
   3  -8   8   -2.00    4.30
   3  -8   8   11.80    6.60
  -3  -8  -8    4.60    7.50
   3  -8   8   12.00    8.20
  -3  -8  -8   11.70    7.90
  -3  -8  -9   -3.80    9.10
  -3  -8  -9    6.60    7.90
   3  -8   9  -12.00    6.30
   3  -8   9    6.10    8.10
  -3  -8 -10    0.60    9.60
   3  -8  10   -3.60    9.00
  -3  -8 -10    1.50    7.40
   3  -8  10   12.10    6.50
  -3  -8 -11    0.10    8.90
  -3  -8 -11   12.30    7.80
   3  -8  11   -1.60    9.90
  -3  -8 -12   -2.90    8.20
  -3  -8 -12    5.00   10.70
   3  -8  12   12.30   10.70
  -3  -8 -13   -9.20    8.20
   3  -9 -12    4.00    9.10
  -3  -9  11  -14.90   10.50
   3  -9 -11    0.70    9.50
   3  -9 -11   -2.70    8.90
  -3  -9  11  -15.60    7.10
   3  -9 -10   15.70    8.00
  -3  -9  10   -0.60    7.30
   3  -9 -10    2.30    9.10
  -3  -9  10    3.90    9.60
   3  -9  -9   -4.30    8.60
  -3  -9   9   -0.40    9.40
   3  -9  -9    2.80    9.40
  -3  -9   9  -10.90    7.20
  -3  -9   8   -3.70    7.30
   3  -9  -8    3.30    8.50
   3  -9  -8    4.50    9.30
  -3  -9   8    8.80    8.30
  -3  -9   7  -10.00    7.20
   3  -9  -7   -8.90    8.40
   3  -9  -7   -2.60    8.60
  -3  -9   7  -10.80    7.90
  -3  -9   6    3.20    7.60
   3  -9  -6    1.00    7.30
   3  -9  -6  -17.10    8.20
  -3  -9   6    2.80    7.40
  -3   9   5   14.90    6.70
   3  -9  -5   -9.90    8.10
  -3  -9   5   -1.10    7.20
   3  -9  -5   -7.00    7.90
  -3  -9   5  -10.60    6.80
  -3  -9   5  -13.50    7.60
  -3   9   4    4.90    7.30
  -3  -9   4    1.20    6.60
   3  -9  -4   -8.80    7.40
  -3  -9   4   -3.00    7.40
  -3  -9   4   -2.00    4.80
   3  -9  -4   -3.70    8.10
  -3   9   3    4.40    7.60
   3  -9  -3   -9.00    7.10
  -3  -9   3   -2.10    5.80
  -3  -9   3   -2.10    7.80
   3  -9  -3  -10.80    6.90
  -3  -9   3   -4.60    5.30
  -3   9   2   16.90    8.10
   3   9  -2   40.10   13.20
   3  -9  -2    2.80    6.90
  -3  -9   2    6.20    5.50
   3  -9  -2    3.80    3.90
   3  -9  -2   -4.30    7.80
  -3  -9   2    2.10    5.80
  -3  -9   2    8.10    8.40
   3   9  -1   23.20    9.60
  -3   9   1    6.00    8.80
   3  -9  -1   -5.50    6.70
   3  -9  -1    1.40    4.50
  -3  -9   1  -10.90    7.30
   3  -9  -1   -9.80    7.40
  -3  -9   1   -5.30    5.00
  -3  -9   1   -7.40    5.80
   3   9   0   44.40    9.50
  -3   9   0   33.50    9.30
  -3  -9   0   21.40    5.10
  -3  -9   0   14.60    7.60
   3  -9   0   21.60    6.60
  -3  -9   0   14.00    6.90
   3  -9   0   26.40    5.30
   3  -9   0   14.80    7.10
  -3   9  -1   13.60   12.80
   3   9   1   16.80    8.90
  -3  -9  -1   -2.00    7.50
   3  -9   1    8.90    6.30
  -3  -9  -1    6.70    4.70
   3  -9   1    8.00    5.40
   3  -9   1   16.90    7.70
  -3  -9  -1    4.30    6.70
  -3  -9  -2   16.00    4.20
   3  -9   2   24.50    7.90
  -3  -9  -2   14.00    7.70
  -3  -9  -2   22.40    7.10
   3  -9   2   20.80    6.30
   3  -9   2   22.90    6.10
   3  -9   3    8.80    7.40
  -3  -9  -3    1.60    7.50
   3  -9   3    7.20    5.80
  -3  -9  -3   17.30    8.60
   3  -9   3   10.70    6.20
   3  -9   4   26.30    7.60
   3  -9   4   24.00    6.40
  -3  -9  -4   20.50    8.20
   3  -9   4   26.90    6.10
  -3  -9  -4   21.60    8.00
   3  -9   5   12.40    7.70
  -3  -9  -5   24.00    8.70
  -3  -9  -5    8.40    8.80
   3  -9   5   12.60    6.90
   3  -9   5    8.20    5.60
  -3  -9  -6    6.70    7.90
   3  -9   6    5.60    8.70
   3  -9   6    3.30    7.50
  -3  -9  -6    2.30    8.80
   3  -9   6   -1.10    7.20
  -3  -9  -7    6.90    9.10
  -3  -9  -7    0.60    8.30
   3  -9   7   -0.40    7.70
   3  -9   7   -5.40    7.80
  -3  -9  -8    3.40    8.70
   3  -9   8   17.60    8.50
  -3  -9  -8    9.00    9.10
   3  -9   8   -1.80    7.50
   3  -9   9   17.80    7.70
  -3  -9  -9    2.00    9.20
   3  -9   9   -3.20    8.60
  -3  -9  -9   14.00    8.60
  -3  -9 -10   19.60    9.40
   3  -9  10    4.50    9.90
  -3  -9 -10    4.00   10.90
   3  -9  10   32.10    7.70
  -3  -9 -11    3.20    9.20
  -3 -10   9  -12.10    8.40
  -3 -10   9   -1.30   10.10
  -3 -10   8   24.20    8.70
  -3 -10   8   23.50    9.60
   3 -10  -8   11.50    9.50
   3 -10  -8   18.20    9.10
  -3 -10   7   10.90    8.70
   3 -10  -7   -2.60    9.50
  -3 -10   7   -2.30    8.60
   3 -10  -7    3.70    9.80
  -3 -10   6   38.50    8.40
   3 -10  -6   32.60    8.80
  -3 -10   6   33.80    8.90
   3 -10  -6   28.20   10.00
   3 -10  -5    3.90    8.60
  -3 -10   5    4.20    8.90
   3 -10  -5   -0.60    8.90
  -3 -10   5   15.20    7.60
  -3  10   4   55.79   12.80
   3 -10  -4   30.40    8.80
  -3 -10   4   37.10    7.10
  -3 -10   4   37.70    9.40
   3 -10  -4   16.90    8.60
  -3  10   3   27.60    9.10
  -3 -10   3    1.80    6.40
   3 -10  -3   -5.00    9.10
  -3 -10   3  -11.10    8.60
  -3 -10   3    0.60    6.20
   3 -10  -3    0.80    7.90
  -3  10   2   46.40   10.60
  -3 -10   2   11.80    6.10
  -3 -10   2   22.60    9.40
  -3 -10   2   15.80    6.80
   3 -10  -2   13.20    9.00
   3 -10  -2   21.00    7.20
  -3 -10   1   -8.40    6.90
   3 -10  -1    2.30    7.90
  -3 -10   1    2.60    9.20
   3 -10  -1   -0.70    7.60
  -3 -10   1   -9.10    5.70
  -3 -10   0   15.90    9.70
  -3 -10   0   12.80    5.60
   3 -10   0   17.50    8.10
   3 -10   0   25.90    7.60
  -3 -10   0   24.70    7.30
   3 -10   0   15.20    5.50
   3  10   1   36.60   12.00
  -3 -10  -1    9.50    7.90
   3 -10   1    2.60    7.00
   3 -10   1   10.90    6.00
   3 -10   1    1.40    8.60
  -3 -10  -1    7.00    9.80
   3 -10   2    5.00    6.30
  -3 -10  -2    1.70    9.70
   3 -10   2   12.40    9.00
   3 -10   2    6.50    7.00
  -3 -10  -2    2.20    7.70
  -3 -10  -3   15.20    8.50
   3 -10   3   24.20    6.90
   3 -10   3   15.60    8.60
   3 -10   3   24.80    6.70
  -3 -10  -3   11.10    8.70
  -3 -10  -4    6.70    9.70
   3 -10   4   -7.60    7.10
  -3 -10  -4   -8.50    8.80
   3 -10   4    4.90    6.40
   3 -10   4  -14.80    8.40
  -3 -10  -5    1.20    8.80
   3 -10   5   22.80    6.40
   3 -10   5   -4.40    8.80
  -3 -10  -5    3.70    8.90
   3 -10   5    8.60    7.90
   3 -10   6    0.90    8.10
   3 -10   6    3.10    8.50
  -3 -10  -6   14.30    9.80
  -3 -10  -6  -10.00    9.60
  -3 -10  -7    4.60   10.30
   3 -10   7   10.80    9.10
  -3 -10  -7   15.60   10.70
   3 -10   7    3.90    8.50
   3 -10   8    6.90    9.20
  -3 -10  -8   -0.10   12.50
   3 -10   8   21.10    9.00
  -3 -11   5    6.00   10.20
  -3 -11   4   -3.20    7.30
  -3 -11   4    8.90   10.60
   3 -11  -4   -2.40    9.30
  -3 -11   3    9.30   10.60
  -3 -11   3   -4.00    6.90
   3 -11  -3   16.20    9.10
  -3 -11   2    1.00    7.20
   3 -11  -2   12.20    8.90
  -3 -11   2   -5.80   10.30
  -3 -11   2  -14.20    9.80
   3 -11  -1   12.50    8.50
  -3 -11   1   -9.10    7.70
  -3 -11   1    4.50   10.60
   3 -11  -1   15.60   15.60
  -3 -11   0   -6.40    8.10
   3 -11   0   -8.50   10.20
   3 -11   0    3.10    8.10
  -3 -11   0    5.80   12.50
   3 -11   1    9.50    9.00
  -3 -11  -1   -4.10    8.60
   3 -11   1   16.20    7.60
  -3 -11  -2   -9.20    8.80
   3 -11   2   10.50   10.30
   3 -11   2    7.20    7.40
   3 -11   2    7.70    7.10
   3 -11   3    7.20    7.00
  -3 -11  -3   10.00    9.60
   3 -11   3    7.00    9.80
   3 -11   3   13.30    7.20
   3 -11   4    3.90   10.40
  -4   0  20   12.40    8.80
  -4   0  19    2.40    8.40
   4   0 -18   -1.40    5.60
  -4   0  18    8.40    8.10
   4   0 -17    4.80    6.10
   4   0 -17   14.10    6.60
  -4   0  17    2.70    7.40
   4   0 -16  135.89    8.20
  -4   0  16  145.19   11.10
   4   0 -16  146.29   10.70
   4   0 -15    2.90    4.40
  -4   0  15   12.70    6.60
  -4   0  15   -6.90   20.50
   4   0 -15   23.20   27.70
   4   0 -15    5.60    5.60
   4   0 -14  519.65   40.40
   4   0 -14  463.95   15.20
  -4   0  14  467.15   31.30
   4   0 -14  459.05   13.60
   4   0 -13    5.50   19.30
  -4   0  13  -10.30   15.90
   4   0 -13    2.10    3.70
   4   0 -13    1.20    4.80
  -4   0  13   -1.00    5.50
   4   0 -12  202.08   26.10
   4   0 -12  170.78    9.10
  -4   0  12  196.78   21.90
   4   0 -12  193.18    7.50
  -4   0  12  188.68    9.20
   4   0 -11    0.60    4.10
  -4   0  11    1.90   11.90
   4   0 -11    4.30   13.30
   4   0 -11    2.90    1.60
  -4   0  11   -5.10    4.40
   4   0 -10  925.21   22.70
   4   0 -10  931.21   23.50
   4   0 -10  951.30   24.30
   4   0 -10  923.31   35.10
  -4   0  10  930.31   33.40
  -4   0  10  936.21   24.00
   4   0  -9   -2.70    3.40
   4   0  -9   -1.90    2.50
   4   0  -9   -1.00    1.60
  -4   0   9   -4.10    3.40
  -4   0   9    2.50    8.30
   4   0  -9    9.90   10.20
   4   0  -8  551.44   15.30
  -4   0   8  549.45   21.40
  -4   0   8  556.34   14.70
   4   0  -8  571.34   14.30
   4   0  -8  546.15   22.50
  -4   0   7   -1.20    1.50
  -4   0   7   -2.30    5.60
   4   0  -7    2.40    1.90
   4   0  -7    2.60    3.00
   4   0  -7   -3.90    6.40
  -4   0   7   -2.70    2.50
   4   0  -6  528.85   14.20
   4   0  -6  523.05   18.10
  -4   0   6  516.65   13.70
  -4   0   6  550.24   13.10
  -4   0   6  523.25   17.20
  -4   0   5   -2.60    1.30
  -4   0   5    2.80    2.00
  -4   0   5   -1.60    1.50
  -4   0   5   -0.70    3.90
   4   0  -5    2.50    2.30
  -4   0   5   -1.90    3.50
  -4   0   4  377.36   10.80
  -4   0   4  380.56    9.90
  -4   0   4  365.26   11.60
  -4   0   4  396.76    9.60
   4   0  -4  382.16   10.20
  -4   0   4  388.86    9.70
  -4   0   3    0.80    1.30
  -4   0   3   -0.60    2.10
   4   0  -3    2.10    2.60
  -4   0   3   -1.10    1.80
  -4   0   3    3.20    1.50
  -4   0   3    0.70    1.20
  -4   0   2  732.13   20.70
   4   0  -2  723.83   21.10
  -4   0   2  757.52   18.40
  -4   0   2  769.92   18.30
  -4   0   2  760.42   18.30
   4   0  -1    4.60    3.70
  -4   0   1    1.40    1.20
  -4   0   1    2.80    1.30
  -4   0   1    3.80    1.60
  -4   0   1    0.20    3.50
  -4   0   1    1.50    1.20
   4   0   0    9.70    4.80
  -4   0   0    7.60    1.20
  -4   0   0    4.70    4.70
   4   0   0    9.80    1.40
  -4   0   0    7.00    1.30
  -4   0   0    4.10    1.40
  -4   0  -1    0.80    1.20
   4   0   1    5.30    1.50
   4   0   1    2.20    5.00
  -4   0  -1    0.10    1.20
  -4   0  -1    5.00    5.40
  -4   0  -1    0.60    1.50
   4   0   2   20.90    7.10
  -4   0  -2   16.80    7.90
  -4   0  -2   26.40    2.00
   4   0   2   25.10    2.40
  -4   0  -2   21.20    2.60
  -4   0  -2   25.60    2.00
  -4   0  -3   11.10    8.10
   4   0   3   -1.50    1.70
  -4   0  -3   -0.30    1.90
  -4   0  -3    4.10    1.60
  -4   0  -3    1.30    1.20
   4   0   3  -14.70    6.50
  -4   0  -4    3.50    2.00
  -4   0  -4    3.20    1.40
  -4   0  -4    1.10    2.20
   4   0   4   -1.10    2.20
   4   0   4   -1.30    9.50
  -4   0  -4    3.90    8.60
  -4   0  -5    1.20    2.50
  -4   0  -5   10.00   10.40
  -4   0  -5    3.00    1.50
   4   0   5   -1.70    2.40
  -4   0  -5    4.50    2.10
   4   0   5  -13.60    9.00
  -4   0  -6   32.40   12.60
   4   0   6   32.50    3.30
  -4   0  -6   34.50    3.30
  -4   0  -6   38.90    2.70
   4   0   6   40.20   12.70
  -4   0  -6   32.90    3.80
  -4   0  -7    5.00   12.00
  -4   0  -7   -1.00    3.10
   4   0   7    5.40   12.10
   4   0   7   -2.70    3.10
  -4   0  -7    3.20    1.70
  -4   0  -7    4.50    2.60
  -4   0  -8 1066.89   26.60
   4   0   8 1061.99   26.90
   4   0   8 1112.09   44.20
  -4   0  -8 1061.99   25.90
  -4   0  -8 1019.60   43.70
  -4   0  -8 1058.39   26.90
   4   0   9    3.30   14.80
  -4   0  -9   16.60   17.40
  -4   0  -9   -0.50    3.60
   4   0   9    2.50    4.00
  -4   0  -9    4.90    3.60
  -4   0  -9    0.00    1.90
  -4   0 -10  438.26   35.70
  -4   0 -10  412.66   10.90
  -4   0 -10  408.06   12.70
   4   0  10  411.86   13.00
  -4   0 -10  426.66   12.30
   4   0  10  482.05   34.40
  -4   0 -11  -38.60   22.30
  -4   0 -11    1.60    4.30
   4   0  11   -1.00    4.80
  -4   0 -11   -1.30    2.00
  -4   0 -11    7.40    4.30
   4   0  11    8.20   20.90
   4   0  12  480.35   36.70
  -4   0 -12  557.04   15.30
  -4   0 -12  518.45   13.00
  -4   0 -12  578.34   46.30
   4   0  12  493.05   16.80
  -4   0 -12  458.75   19.10
   4   0  13    1.20    6.00
  -4   0 -13   -1.40    5.00
  -4   0 -13    2.60    5.00
  -4   0 -13   -2.20    2.00
   4   0  13   68.89   28.00
  -4   0 -13   -1.30   30.10
   4   0  14  230.48   12.00
   4   0  14  178.68   31.40
  -4   0 -14  240.08   10.00
  -4   0 -14  253.07   42.80
  -4   0 -14  218.68   10.70
   4   0  15    7.60    6.70
  -4   0 -15    1.20    5.90
  -4   0 -15    6.00    5.70
  -4   0 -16  110.19   10.50
  -4   0 -16  108.09    9.10
   4   0  16  118.19   12.00
   4   0  17    2.20    7.90
  -4   0 -17    3.00    6.50
   4   0  18   50.79    9.40
  -4   0 -18   35.80    7.30
  -4  -1  20    9.10   10.10
  -4   1  19   12.20    7.40
  -4  -1  19   -6.80    9.00
   4  -1 -19  -11.70    6.90
  -4   1  18   23.90    7.20
   4   1 -18   46.40    8.50
   4  -1 -18   23.80    6.70
  -4  -1  18   23.70    9.00
   4   1 -17    7.10    7.60
  -4   1  17    9.70    6.60
   4  -1 -17    0.70    6.10
  -4  -1  17   -6.80    8.30
   4   1 -16   49.30    4.40
  -4   1  16   53.79    6.80
   4   1 -16   70.39    7.90
   4  -1 -16   52.69    6.40
   4  -1 -16   68.99    8.50
  -4  -1  16   54.59    8.50
  -4   1  15   22.80    6.00
   4   1 -15   58.69   30.20
  -4   1  15    8.00   20.30
   4   1 -15   15.30    3.60
   4   1 -15   26.10    6.70
  -4  -1  15   13.70   21.60
   4  -1 -15   20.60    5.10
   4  -1 -15   12.30   27.10
  -4  -1  15    8.20    7.30
   4   1 -14   26.00    3.50
  -4   1  14   40.60   18.60
  -4   1  14   25.00    5.50
   4   1 -14   42.90   26.00
   4   1 -14   23.20    6.30
   4  -1 -14   18.00   23.40
   4  -1 -14   31.90    5.30
  -4  -1  14   30.00   18.40
   4  -1 -14   33.80    4.90
   4  -1 -14   35.50    3.60
  -4  -1  14   14.40    6.60
  -4   1  13   32.10   15.70
   4   1 -13   -5.60    5.50
  -4   1  13   -3.30    4.70
   4   1 -13    3.60    2.90
   4   1 -13   18.60   21.00
  -4  -1  13   24.90   17.20
  -4  -1  13   -8.00    5.90
   4  -1 -13    1.70    4.50
   4  -1 -13  -20.30   18.10
   4  -1 -13    4.30    2.30
   4  -1 -13   -3.20    4.20
   4   1 -12  439.76   14.60
  -4   1  12  449.66   25.70
  -4   1  12  417.86   13.00
   4   1 -12  425.96   11.80
   4   1 -12  478.15   32.90
  -4  -1  12  420.26   14.00
   4  -1 -12  449.95   29.50
   4  -1 -12  437.26   11.50
  -4  -1  12  462.45   27.50
   4  -1 -12  427.86   13.20
   4  -1 -12  432.46   13.00
   4   1 -11   86.49   18.70
  -4   1  11   88.59   13.70
  -4   1  11   80.59    6.10
   4   1 -11   80.09    4.40
   4   1 -11   77.69    8.00
   4  -1 -11   79.99    4.10
   4  -1 -11   99.99   15.40
  -4  -1  11   74.69    7.30
   4  -1 -11   73.79    6.10
   4  -1 -11   65.69    5.90
  -4  -1  11   95.09   15.20
  -4   1  10  718.93   29.40
   4   1 -10  793.42   19.60
   4   1 -10  806.32   21.40
   4   1 -10  768.72   34.30
  -4   1  10  763.42   20.20
   4  -1 -10  796.42   20.30
   4  -1 -10  781.12   19.50
  -4  -1  10  772.92   31.30
  -4  -1  10  805.02   20.90
   4  -1 -10  832.52   31.30
  -4   1   9  348.17   18.10
   4   1  -9  362.16    9.70
   4   1  -9  371.16   22.90
  -4   1   9  354.66   10.30
   4   1  -9  372.56   11.90
  -4  -1   9  370.46    9.20
   4  -1  -9  370.06   10.80
   4  -1  -9  364.26    9.70
  -4  -1   9  332.97   19.40
   4  -1  -9  382.06   19.40
   4  -1  -9  359.26   10.40
  -4  -1   9  361.96   11.20
   4   1  -8 1367.46   32.80
  -4   1   8 1283.07   39.60
  -4   1   8 1342.87   33.10
   4   1  -8 1347.77   34.20
   4  -1  -8 1339.47   32.90
   4  -1  -8 1371.36   33.30
   4  -1  -8 1363.46   40.00
  -4  -1   8 1349.96   33.60
   4  -1  -8 1367.36   33.50
  -4  -1   8 1394.86   32.60
  -4  -1   8 1345.87   41.50
  -4   1   7  652.83   17.00
   4   1  -7  697.03   16.70
   4   1  -7  666.33   18.10
  -4   1   7  641.44   22.30
   4  -1  -7  685.03   16.80
  -4  -1   7  689.83   16.50
   4  -1  -7  686.73   17.40
  -4  -1   7  675.53   17.60
  -4  -1   7  687.93   24.70
  -4  -1   7  671.13   27.10
   4  -1  -7  670.93   22.00
   4  -1  -7  678.03   17.10
  -4   1   6 2121.59   51.89
   4   1  -6 2087.59   52.69
  -4   1   6 2150.08   55.99
  -4  -1   6 2193.88   58.69
  -4  -1   6 2206.98   51.59
   4  -1  -6 2134.59   55.19
  -4  -1   6 2224.48   52.29
   4  -1  -6 2164.08   52.19
  -4  -1   6 2109.39   59.99
  -4   1   5  925.81   22.70
  -4   1   5  952.90   22.70
  -4   1   5  924.51   25.80
   4   1  -5  888.31   25.40
  -4   1   5  929.61   22.90
  -4  -1   5  944.61   22.50
  -4  -1   5  935.11   30.10
   4  -1  -5  894.81   24.50
  -4  -1   5  920.11   23.10
  -4  -1   5  936.81   28.80
  -4  -1   5  947.11   22.50
  -4   1   4 3495.15   83.59
   4   1  -4 3586.04   89.89
  -4   1   4 3459.95   83.69
  -4   1   4 3435.16   83.79
  -4   1   4 3538.45   83.59
   4   1  -4 3336.57   84.19
  -4  -1   4 3479.15   83.49
  -4  -1   4 3412.66   83.89
  -4  -1   4 3550.34   83.39
  -4  -1   4 3656.43   90.69
  -4   1   3 1288.67   31.30
   4   1  -3 1318.47   38.10
  -4   1   3 1313.37   31.50
  -4   1   3 1345.47   31.40
   4   1  -3 1241.58   31.80
  -4   1   3 1269.77   31.60
   4  -1  -3 1319.37   33.70
   4  -1  -3 1281.67   32.80
  -4  -1   3 1298.07   31.60
  -4  -1   3 1333.87   31.20
  -4  -1   3 1254.37   37.90
  -4  -1   3 1303.47   31.30
   4   1  -2 1878.91   48.10
  -4   1   2 1932.11   48.00
  -4   1   2 2035.60   47.80
  -4   1   2 2033.40   51.09
  -4   1   2 1987.60   47.80
   4   1  -2 2047.00   55.49
   4  -1  -2 1992.70   50.59
  -4  -1   2 2004.70   47.90
  -4  -1   2 1947.31   47.70
  -4  -1   2 2011.00   47.60
  -4  -1   2 2011.70   54.39
  -4   1   1 1223.18   30.60
  -4   1   1 1290.27   30.40
  -4   1   1 1277.77   34.90
  -4   1   1 1275.67   30.40
   4   1  -1 1241.68   37.40
  -4  -1   1 1232.88   30.40
   4  -1  -1 1230.38   34.50
  -4  -1   1 1273.87   37.00
   4  -1  -1 1239.78   30.30
  -4  -1   1 1273.57   30.30
  -4  -1   1 1266.47   30.50
   4   1   0 2003.20   55.59
  -4   1   0 2010.70   48.10
  -4   1   0 2001.10   48.50
  -4   1   0 2037.90   54.09
  -4   1   0 1983.70   48.10
   4  -1   0 2024.20   48.20
  -4  -1   0 1996.90   48.10
  -4  -1   0 2033.90   48.20
  -4  -1   0 2050.69   55.59
   4  -1   0 2005.90   53.89
  -4  -1   0 1975.00   48.20
  -4  -1   0 1936.21   48.40
  -4   1  -1  234.78    6.20
  -4   1  -1  236.58    6.30
  -4   1  -1  235.78   13.30
   4   1   1  232.38   13.40
  -4   1  -1  233.98    6.90
  -4  -1  -1  223.98    6.50
   4  -1   1  237.78   13.10
   4  -1   1  230.98    6.40
  -4  -1  -1  231.78    6.30
  -4  -1  -1  218.68   14.00
  -4  -1  -1  228.98    6.30
  -4   1  -2   23.40    8.30
   4   1   2    7.80    1.60
   4   1   2    6.40    7.40
  -4   1  -2    6.80    2.30
   4  -1   2    6.40    2.00
   4  -1   2    6.10    6.30
  -4  -1  -2    7.90    1.50
  -4  -1  -2   15.80    8.30
  -4  -1  -2    8.10    1.70
  -4   1  -3  162.68    5.80
   4   1   3  159.08    4.90
   4   1   3  144.49   13.70
  -4   1  -3  157.18    4.70
  -4   1  -3  160.58   15.30
  -4   1  -3  158.48    4.70
   4  -1   3  182.18   13.80
  -4  -1  -3  156.78    5.00
  -4  -1  -3  158.08    4.80
   4  -1   3  157.88    5.10
  -4  -1  -3  161.58    5.00
  -4  -1  -3  135.09   15.00
  -4   1  -4  375.76   11.60
  -4   1  -4  392.76   21.60
   4   1   4  397.46   10.40
  -4   1  -4  396.96   10.20
   4   1   4  398.86   22.40
  -4   1  -4  404.66   10.00
   4  -1   4  399.86   20.90
  -4  -1  -4  387.56   22.30
   4  -1   4  394.26   10.70
  -4  -1  -4  388.16   10.30
  -4  -1  -4  385.66   10.40
  -4  -1  -4  389.86   10.10
   4   1   5  110.79   15.40
  -4   1  -5   88.89   14.40
  -4   1  -5  100.99    5.60
  -4   1  -5   99.89    3.60
  -4   1  -5   95.69    3.80
   4   1   5   99.39    4.40
  -4  -1  -5  104.49    4.00
  -4  -1  -5  104.49   15.10
   4  -1   5  100.69   14.80
  -4  -1  -5  104.29    4.50
  -4  -1  -5  100.39    4.40
   4  -1   5   93.59    5.10
  -4   1  -6  756.12   33.40
  -4   1  -6  730.73   18.30
   4   1   6  715.93   18.50
  -4   1  -6  740.43   19.20
  -4   1  -6  744.23   17.90
   4   1   6  739.53   32.90
   4  -1   6  728.53   18.90
  -4  -1  -6  723.53   18.60
  -4  -1  -6  717.23   18.30
  -4  -1  -6  724.93   18.10
   4  -1   6  700.33   31.90
  -4  -1  -6  736.03   32.90
  -4   1  -7   58.79    5.80
  -4   1  -7   58.09    3.10
  -4   1  -7   65.89    4.10
   4   1   7   51.29   15.00
   4   1   7   60.89    5.00
  -4   1  -7   92.09   18.70
  -4  -1  -7   62.69    4.30
  -4  -1  -7   65.09    5.20
   4  -1   7   62.69    5.60
  -4  -1  -7   63.99    3.60
   4  -1   7   79.09   15.40
  -4  -1  -7   82.99   16.70
  -4   1  -8  105.49   20.00
   4   1   8  110.09   18.60
  -4   1  -8   91.09    4.70
   4   1   8   88.19    5.40
  -4   1  -8   79.29    6.60
  -4   1  -8   84.29    3.60
   4  -1   8   85.49    6.30
  -4  -1  -8   87.09   20.40
  -4  -1  -8   97.39    5.40
   4  -1   8   83.19   17.50
  -4  -1  -8   91.39    4.10
   4   1   9  160.58   23.60
  -4   1  -9  174.98    6.50
  -4   1  -9  184.28    8.40
   4   1   9  178.78    7.20
  -4   1  -9  176.08    5.40
  -4   1  -9  176.78   28.20
  -4  -1  -9  200.78   27.60
   4  -1   9  170.18   23.10
  -4  -1  -9  174.38    6.70
   4  -1   9  169.08    8.30
  -4  -1  -9  174.48    5.90
  -4  -1  -9  177.48    7.80
   4   1  10  189.38    8.40
  -4   1 -10  190.78    5.80
  -4   1 -10  190.08    7.20
  -4   1 -10  198.38    9.60
   4   1  10  214.68   29.60
  -4   1 -10  230.78   30.00
  -4  -1 -10  197.88    6.30
  -4  -1 -10  198.38   27.00
   4  -1  10  182.58    9.20
  -4  -1 -10  208.38    8.60
  -4  -1 -10  191.68    7.50
   4  -1  10  244.68   29.30
   4   1  11  -14.10   20.60
  -4   1 -11   -3.10    5.20
  -4   1 -11   -7.00   21.40
  -4   1 -11    6.40    1.90
  -4   1 -11    6.60    3.70
   4   1  11    6.10    4.70
  -4  -1 -11    2.80    2.40
  -4  -1 -11    4.70    3.70
   4  -1  11    6.10    5.40
   4  -1  11   36.30   22.00
  -4  -1 -11   52.79   23.80
  -4   1 -12   64.49    8.90
  -4   1 -12  103.99   28.80
   4   1  12  105.09   23.30
   4   1  12   79.29    8.00
  -4   1 -12   69.29    6.60
  -4  -1 -12   73.99    6.50
   4  -1  12   71.29   25.50
  -4  -1 -12   72.79    7.90
  -4  -1 -12   59.49    4.20
   4  -1  12   75.99    8.60
  -4  -1 -12   28.50   24.20
   4   1  13    2.50    9.70
  -4   1 -13  -28.30   31.60
  -4   1 -13    2.40    6.00
   4   1  13   -5.80   23.70
   4  -1  13    1.60    6.40
  -4  -1 -13  -34.10   27.40
  -4  -1 -13    1.10    5.70
   4  -1  13   43.60   26.90
  -4  -1 -13    5.80    4.30
  -4  -1 -13   -6.20    2.40
  -4   1 -14    6.90    6.30
   4   1  14   10.20    6.10
  -4   1 -14    8.90    4.70
  -4   1 -14   13.50   35.30
   4   1  14  -39.60   42.10
  -4  -1 -14    9.20    4.60
  -4  -1 -14    8.30    5.30
   4  -1  14    3.70    6.80
  -4  -1 -14   37.10   52.69
   4  -1  14   28.40   33.30
  -4   1 -15    0.00    6.90
   4   1  15    3.90    6.50
  -4   1 -15   12.10    5.30
  -4  -1 -15    4.70    6.50
  -4  -1 -15   -0.50    4.80
   4  -1  15   -0.90    7.40
  -4   1 -16    1.80    5.50
  -4   1 -16    3.10    7.30
   4   1  16    6.70    6.90
   4  -1  16    3.10    7.90
  -4  -1 -16   10.30    6.80
  -4   1 -17   21.30    6.10
   4   1  17   18.60    7.50
  -4   1 -17   13.90    8.20
  -4  -1 -17   25.00    7.60
   4  -1  17   14.50    8.80
   4   1  18   -3.60    7.90
  -4   1 -18   -7.60    6.30
  -4  -1 -18   -3.90    7.80
   4  -1  18   -7.30    9.50
  -4  -2  19    2.30    9.90
   4  -2 -19   -1.70    7.60
  -4   2  18    4.90    6.60
   4  -2 -18   -1.80    7.40
  -4  -2  18    4.30    9.50
  -4   2  17   27.20    8.90
   4   2 -17   27.10    9.40
   4  -2 -17   18.80    7.00
  -4  -2  17   20.80    8.80
   4   2 -16   13.60    7.70
  -4   2  16   10.40    5.10
   4  -2 -16    4.60    6.60
  -4  -2  16   -4.50    7.80
  -4   2  15   75.69    7.20
  -4   2  15   41.10   24.30
   4   2 -15   73.79    8.30
  -4  -2  15   62.89    8.30
  -4  -2  15   70.69   25.40
   4  -2 -15   62.69    6.90
   4  -2 -15   70.59    7.00
   4  -2 -15   80.69    6.10
   4  -2 -15   87.19   27.30
  -4   2  14   26.10    4.50
   4   2 -14   13.70    2.40
  -4   2  14   17.40   21.00
   4   2 -14   11.90    6.90
   4  -2 -14   17.30    6.00
   4  -2 -14   18.60    3.90
   4  -2 -14   17.20    3.30
  -4  -2  14   20.20    7.50
   4  -2 -14   41.60   22.70
  -4  -2  14   35.60   19.50
   4   2 -13  117.09    4.40
  -4   2  13  116.59    6.70
  -4   2  13   71.99   20.40
   4   2 -13  123.29   10.30
  -4  -2  13   99.39   20.00
   4  -2 -13  128.99    6.40
   4  -2 -13  129.89    6.00
   4  -2 -13  126.69   21.30
  -4  -2  13  108.59    9.90
   4   2 -12   70.39    7.00
  -4   2  12   52.99   16.80
   4   2 -12   59.29    3.30
  -4   2  12   68.19    5.50
   4  -2 -12   77.49    5.10
   4  -2 -12   62.19    5.70
  -4  -2  12   71.19   17.50
   4  -2 -12   65.69    5.60
  -4  -2  12   64.09    7.10
   4  -2 -12   90.49   17.40
   4   2 -11  276.97   11.30
  -4   2  11  280.67   22.70
  -4   2  11  261.47    8.40
   4   2 -11  250.07    6.90
   4  -2 -11  257.37    8.40
   4  -2 -11  273.07    8.20
  -4  -2  11  232.58   21.90
   4  -2 -11  258.57    9.60
   4  -2 -11  259.17   22.70
  -4  -2  11  261.47   11.00
   4   2 -10  110.59    8.50
  -4   2  10  118.99    5.20
  -4   2  10  121.19   15.50
   4  -2 -10  120.59    6.80
  -4  -2  10  114.99    8.00
   4  -2 -10  123.59    5.30
   4  -2 -10  115.89    5.60
   4  -2 -10  134.49   17.50
  -4  -2  10  142.19   19.40
   4   2  -9  424.76   13.50
  -4   2   9  409.16   11.00
  -4   2   9  389.16   22.20
  -4  -2   9  422.96   10.40
   4  -2  -9  418.96   11.40
  -4  -2   9  424.06   12.90
   4  -2  -9  428.06   22.20
   4  -2  -9  409.06   11.20
  -4  -2   9  389.06   24.10
   4  -2  -9  425.96   12.10
   4   2  -8  372.06   12.20
  -4   2   8  389.76   21.00
  -4   2   8  373.26    9.90
  -4  -2   8  378.06    9.50
  -4  -2   8  346.57   21.30
  -4  -2   8  378.06   11.50
   4  -2  -8  360.86   18.50
   4  -2  -8  372.36   10.40
   4  -2  -8  362.56   10.60
   4  -2  -8  381.76   10.30
  -4   2   7  568.04   14.00
   4   2  -7  550.94   15.90
  -4   2   7  529.15   23.40
  -4  -2   7  553.24   15.00
  -4  -2   7  545.05   27.90
   4  -2  -7  562.94   14.80
  -4  -2   7  562.34   13.90
   4  -2  -7  566.24   14.50
   4  -2  -7  559.04   14.40
   4  -2  -7  566.74   21.50
  -4  -2   7  573.34   25.40
  -4   2   6   43.80    2.60
  -4   2   6   37.80    8.90
   4   2  -6   37.30    4.10
  -4  -2   6   46.60   11.20
  -4  -2   6   28.90    3.30
  -4  -2   6   48.10   12.90
   4  -2  -6   33.20    3.30
  -4  -2   6   45.50    2.60
   4  -2  -6   31.40    3.50
   4  -2  -6   33.40    7.70
  -4   2   5    2.20    6.90
  -4   2   5    3.50    2.10
   4   2  -5    4.80    3.30
  -4   2   5    1.40    2.50
  -4   2   5    4.60    1.50
  -4  -2   5    6.80    1.60
   4  -2  -5    3.50    1.90
  -4  -2   5    1.20    2.60
  -4  -2   5    3.60   10.00
   4  -2  -5    6.90    6.40
  -4   2   4 2095.49   50.99
   4   2  -4 2061.89   61.59
   4   2  -4 2063.69   51.69
  -4   2   4 2182.98   57.29
  -4   2   4 2118.19   51.09
   4  -2  -4 2136.19   57.79
  -4  -2   4 2159.68   51.29
  -4  -2   4 2087.79   50.79
  -4  -2   4 2150.38   62.39
   4  -2  -4 2074.09   50.89
  -4   2   3  485.25   12.70
   4   2  -3  483.05   22.90
  -4   2   3  496.35   12.80
  -4  -2   3  506.45   12.50
  -4  -2   3  494.65   23.50
   4  -2  -3  500.25   12.30
  -4  -2   3  497.55   12.90
   4  -2  -3  469.05   19.70
  -4  -2   3  513.95   12.20
   4   2  -2  604.74   25.70
  -4   2   2  618.24   15.50
   4   2  -2  602.54   15.90
  -4   2   2  598.84   15.20
  -4   2   2  608.04   15.30
  -4  -2   2  618.54   15.30
   4  -2  -2  591.94   21.30
  -4  -2   2  605.74   15.30
  -4  -2   2  601.14   26.50
   4  -2  -2  611.04   22.70
   4  -2  -2  622.54   15.00
  -4  -2   2  623.04   15.00
   4   2  -1 1030.80   37.30
  -4   2   1 1056.79   25.60
   4   2  -1 1040.80   26.10
  -4   2   1 1044.10   25.60
  -4   2   1 1063.49   26.00
   4  -2  -1 1063.19   33.60
  -4  -2   1 1029.90   36.80
   4  -2  -1 1071.29   25.50
  -4  -2   1 1072.09   25.50
  -4  -2   1 1041.70   25.70
   4  -2  -1 1025.50   32.70
  -4  -2   1 1050.79   25.70
  -4   2   0   50.89    9.30
  -4   2   0   47.00    2.60
  -4   2   0   40.10    2.90
   4   2   0   51.09    3.40
  -4   2   0   43.40    3.40
   4   2   0   33.80    9.80
  -4  -2   0   49.60    2.80
  -4  -2   0   50.49    2.90
   4  -2   0   47.50    2.80
   4  -2   0   48.30    8.20
  -4  -2   0   54.59   11.60
  -4  -2   0   51.09    2.80
  -4   2  -1   82.79    3.20
  -4   2  -1   74.39    4.60
   4   2   1   89.99   12.40
  -4   2  -1   71.99   11.80
  -4   2  -1   81.39    3.20
  -4  -2  -1   65.89   11.50
   4  -2   1   80.19   11.60
  -4  -2  -1   85.09    3.30
  -4  -2  -1   83.09    3.40
  -4  -2  -1   99.79    3.80
   4  -2   1   83.59    3.70
   4   2   2 1223.58   41.90
  -4   2  -2 1216.48   30.80
  -4   2  -2 1248.28   29.90
  -4   2  -2 1228.68   40.40
  -4   2  -2 1237.28   29.90
   4  -2   2 1260.57   30.20
   4  -2   2 1229.88   40.20
  -4  -2  -2 1207.28   30.10
  -4  -2  -2 1241.48   42.20
  -4  -2  -2 1230.68   30.20
   4   2   3  361.66   22.30
  -4   2  -3  356.46   20.40
  -4   2  -3  366.76    9.40
  -4   2  -3  352.06   10.40
  -4   2  -3  348.07    9.30
   4   2   3  366.36    9.40
  -4  -2  -3  354.46    9.50
   4  -2   3  350.16   20.00
   4  -2   3  357.36    9.70
  -4  -2  -3  341.27    9.70
  -4  -2  -3  357.06    9.70
  -4  -2  -3  351.86   21.20
   4   2   4  298.17    8.10
   4   2   4  263.77   19.90
  -4   2  -4  291.97    9.30
  -4   2  -4  302.87    8.10
  -4   2  -4  305.17   20.60
  -4   2  -4  298.77    8.00
   4  -2   4  293.17    8.70
   4  -2   4  314.87   20.90
  -4  -2  -4  287.27   21.00
  -4  -2  -4  291.87    8.70
  -4  -2  -4  299.17    8.30
  -4  -2  -4  310.27    8.40
  -4   2  -5   32.10    3.10
  -4   2  -5   29.40   14.30
   4   2   5    9.30   12.40
   4   2   5   27.00    2.60
  -4   2  -5   24.60    2.80
  -4   2  -5   23.70    4.10
  -4  -2  -5   30.30    3.40
  -4  -2  -5   34.70    3.60
   4  -2   5   39.20   13.70
   4  -2   5   18.60    3.10
  -4  -2  -5   21.10    3.30
  -4  -2  -5   11.60   12.50
  -4   2  -6  339.87   24.70
   4   2   6  343.47   25.90
   4   2   6  318.87    9.30
  -4   2  -6  333.97    9.10
  -4   2  -6  324.27    8.80
  -4   2  -6  335.77   11.10
   4  -2   6  334.87   10.40
  -4  -2  -6  340.97    9.20
   4  -2   6  374.36   25.30
  -4  -2  -6  327.97   10.00
  -4  -2  -6  334.37    9.50
  -4  -2  -6  334.17   24.50
   4   2   7   11.50    3.00
  -4   2  -7   19.40    2.70
  -4   2  -7   33.20   17.50
  -4   2  -7   15.30    2.10
  -4   2  -7    8.90    4.60
   4   2   7   16.20   15.80
   4  -2   7   12.90    4.20
  -4  -2  -7   16.20    3.80
  -4  -2  -7   24.20   15.00
  -4  -2  -7   17.90    2.70
  -4  -2  -7   15.60    2.50
   4  -2   7   11.10   12.90
  -4   2  -8  150.28    8.70
  -4   2  -8  184.88   27.90
   4   2   8  157.38    6.40
   4   2   8  208.38   24.90
  -4   2  -8  158.28    5.80
  -4  -2  -8  161.88    8.00
  -4  -2  -8  166.78    6.20
  -4  -2  -8  167.38   24.10
   4  -2   8  198.28   22.10
   4  -2   8  161.08    7.40
  -4  -2  -8  155.98    5.90
   4   2   9  228.98    8.10
  -4   2  -9  212.18   27.60
   4   2   9  251.27   25.70
  -4   2  -9  226.98    7.40
  -4   2  -9  208.28   10.60
   4  -2   9  264.07   29.40
   4  -2   9  196.68    9.70
  -4  -2  -9  220.58    7.30
  -4  -2  -9  166.68   26.50
  -4  -2  -9  213.38    8.60
  -4  -2  -9  216.78    7.10
  -4   2 -10  121.69    5.90
   4   2  10  111.89    6.60
  -4   2 -10   90.89   24.00
  -4   2 -10  114.19    9.10
   4   2  10  113.89   21.30
   4  -2  10  104.99    8.60
  -4  -2 -10  112.39    5.50
  -4  -2 -10  108.69    5.50
   4  -2  10  143.09   22.80
   4  -2  10  117.49    4.30
  -4  -2 -10  108.49    9.20
  -4  -2 -10  101.99   22.90
   4   2  11  141.69    7.50
  -4   2 -11  143.49    6.20
   4   2  11  195.78   27.80
  -4   2 -11  132.49   28.00
  -4   2 -11  125.19    9.80
  -4  -2 -11  129.69    6.40
  -4  -2 -11  141.49    6.20
  -4  -2 -11  137.49    9.10
   4  -2  11  133.29    9.60
   4  -2  11  133.29    4.70
   4  -2  11  150.68   24.30
  -4  -2 -11  120.79   26.10
  -4   2 -12   52.89    7.00
  -4   2 -12   57.89    5.40
   4   2  12   60.59   26.50
   4   2  12   62.99    7.00
  -4   2 -12   35.30   30.00
  -4  -2 -12   66.79    7.60
  -4  -2 -12   48.70    5.10
  -4  -2 -12   51.59   26.00
   4  -2  12   43.10    6.40
   4  -2  12   36.80   26.70
   4   2  13  177.88   28.40
  -4   2 -13  141.89   11.90
   4   2  13  151.68    9.00
  -4   2 -13  112.39   37.00
  -4   2 -13  149.19    7.50
   4  -2  13  140.99   31.20
   4  -2  13  146.99   11.00
  -4  -2 -13  155.48   10.40
  -4  -2 -13  124.29    6.40
  -4  -2 -13  218.08   36.40
  -4   2 -14   45.40    7.90
  -4   2 -14   45.30    5.60
  -4  -2 -14   32.30    3.50
   4  -2  14   31.40    7.60
  -4  -2 -14   43.70    7.10
  -4   2 -15   82.29    7.50
   4   2  15   66.59    6.70
  -4   2 -15   77.29    9.10
  -4  -2 -15   62.19    8.20
   4  -2  15   66.69    9.00
  -4   2 -16   31.00    5.50
   4   2  16   40.80    6.70
  -4  -2 -16   31.30    8.00
   4  -2  16   32.20    8.60
  -4   2 -17   19.90    5.70
   4   2  17   38.30    7.20
   4  -2  17   34.20    9.70
  -4  -2 -17   26.70    7.90
  -4  -2 -18   26.40    9.00
   4  -2  18   25.50   10.60
  -4  -3  19   -6.00   10.90
   4  -3 -19   -1.90    8.90
   4  -3 -18   38.00    8.70
  -4  -3  18   32.90   10.80
  -4  -3  17   10.20    9.50
   4  -3 -17    6.30    7.90
   4  -3 -16   47.70    7.50
  -4  -3  16   34.70    9.30
   4   3 -15   38.40    8.90
  -4   3  15   77.69   28.50
  -4   3  15   28.30    3.90
   4  -3 -15    8.70   28.50
   4  -3 -15   33.70    7.30
   4  -3 -15   37.60    4.40
  -4  -3  15   29.30    9.00
  -4   3  14  101.59    5.60
   4   3 -14   99.69   13.10
   4  -3 -14  105.29   10.00
   4  -3 -14  111.49    7.10
   4  -3 -14   76.89   25.40
  -4  -3  14   95.19   25.10
  -4  -3  14  108.79   11.60
  -4   3  13   90.09   22.40
  -4   3  13   32.90    3.30
   4   3 -13   29.20    7.60
  -4  -3  13   32.90    7.70
  -4  -3  13  -19.90   19.10
   4  -3 -13   33.50    4.10
   4  -3 -13   32.90    6.30
   4  -3 -13   31.70   19.80
  -4   3  12   74.19   19.70
  -4   3  12   48.70    4.00
   4   3 -12   46.20    7.30
   4  -3 -12   24.40   17.50
  -4  -3  12   49.99   19.40
   4  -3 -12   37.60    5.90
  -4  -3  12   33.10    6.50
   4  -3 -12   48.30    4.10
   4   3 -11  153.98   11.40
  -4   3  11  149.69    5.30
  -4   3  11  161.08   23.40
   4  -3 -11  155.98    5.20
   4  -3 -11  172.98   24.10
   4  -3 -11  156.78    4.90
   4  -3 -11  158.98    7.00
  -4  -3  11  136.89   22.00
  -4  -3  11  130.59    8.90
  -4  -3  11  146.19    5.40
   4   3 -10   37.90    6.20
  -4   3  10   48.80   15.70
  -4   3  10   52.49    3.40
  -4  -3  10   46.20   16.30
   4  -3 -10   42.20    5.30
   4  -3 -10   45.10    3.70
   4  -3 -10   51.79    3.30
  -4  -3  10   43.70    3.00
   4  -3 -10   40.10    3.90
   4  -3 -10   53.19   15.30
   4   3  -9  472.95   15.40
  -4   3   9  443.56   27.90
  -4   3   9  465.15   11.80
   4  -3  -9  467.15   26.00
   4  -3  -9  473.25   12.20
   4  -3  -9  483.05   13.80
  -4  -3   9  457.65   28.80
  -4  -3   9  482.95   14.50
   4  -3  -9  439.96   12.50
   4  -3  -9  474.85   12.90
  -4  -3   9  473.35   11.90
  -4   3   8   11.50   12.80
   4   3  -8   15.90    4.90
  -4   3   8   27.90    2.50
  -4  -3   8    7.70   14.10
   4  -3  -8   22.10    4.20
  -4  -3   8   22.30    4.70
   4  -3  -8   19.10   11.70
   4  -3  -8   23.40    2.80
   4  -3  -8   21.20    3.10
  -4  -3   8   26.60    3.00
  -4   3   7  792.22   33.80
   4   3  -7  775.92   22.10
   4  -3  -7  824.42   20.90
   4  -3  -7  814.62   21.10
  -4  -3   7  872.41   36.70
  -4  -3   7  821.82   20.30
   4  -3  -7  811.02   31.60
  -4  -3   7  855.41   21.60
  -4   3   6   38.20    3.70
   4   3  -6   20.10    4.10
  -4   3   6   23.40   11.20
   4  -3  -6   36.60    3.70
  -4  -3   6   42.50   16.40
   4  -3  -6   33.80    2.30
   4  -3  -6   26.00    3.00
  -4  -3   6   39.50    3.40
  -4  -3   6   31.30    4.00
  -4  -3   6   11.30   15.60
   4  -3  -6   26.60   10.80
  -4   3   5 1518.65   36.90
   4   3  -5 1497.15   38.10
   4   3  -5 1506.55   52.09
  -4   3   5 1544.35   48.70
   4  -3  -5 1521.55   36.40
   4  -3  -5 1518.25   48.10
  -4  -3   5 1513.35   36.90
   4  -3  -5 1522.55   37.10
  -4  -3   5 1563.34   37.50
  -4  -3   5 1434.76   52.79
   4   3  -4  131.49   18.00
  -4   3   4  142.09   15.00
  -4   3   4  135.79    5.10
   4   3  -4  136.89    6.90
  -4   3   4  119.89    5.70
   4  -3  -4  122.99    4.90
   4  -3  -4  145.69   16.90
  -4  -3   4  107.79   16.90
  -4  -3   4  125.39    4.90
   4  -3  -4  129.09    4.00
  -4  -3   4  134.19    5.40
  -4   3   3  912.31   33.00
  -4   3   3  926.71   22.90
   4   3  -3  881.81   23.60
   4   3  -3  925.61   38.30
  -4   3   3  904.51   22.80
  -4  -3   3  913.31   38.50
   4  -3  -3  924.01   22.80
  -4  -3   3  883.31   22.80
   4  -3  -3  922.61   34.70
  -4  -3   3  935.01   22.30
  -4  -3   3  906.71   22.90
   4  -3  -3  947.51   22.30
  -4   3   2   73.39    4.40
   4   3  -2   91.79   15.60
   4   3  -2   72.39    5.10
  -4   3   2   68.49    3.80
  -4  -3   2   72.89    4.10
  -4  -3   2   66.79    3.80
  -4  -3   2   69.19    3.30
  -4  -3   2   55.29   15.10
   4  -3  -2   72.29    3.10
   4  -3  -2   75.49   13.00
   4  -3  -2   75.89    4.10
   4   3  -1  781.82   35.10
   4   3  -1  777.52   20.20
  -4   3   1  684.23   21.40
  -4   3   1  795.42   19.50
  -4  -3   1  811.42   36.40
   4  -3  -1  804.52   32.40
  -4  -3   1  803.62   19.60
   4  -3  -1  763.92   29.80
  -4  -3   1  787.92   19.80
   4  -3  -1  771.02   19.50
  -4  -3   1  786.62   19.30
   4  -3  -1  809.42   19.30
  -4   3   0  237.48    7.80
   4   3   0  248.08   20.70
   4   3   0  213.98    8.70
  -4   3   0  235.78    6.70
   4  -3   0  231.08    7.00
   4  -3   0  215.58   17.40
   4  -3   0  236.18    6.70
  -4  -3   0  230.48    6.90
  -4  -3   0  224.78    7.20
   4  -3   0  258.07   19.40
  -4  -3   0  248.88   22.90
  -4  -3   0  231.28    6.80
   4   3   1  362.36   23.60
   4   3   1  384.46   10.70
  -4   3  -1  395.66   11.40
  -4   3  -1  397.06   10.30
  -4  -3  -1  384.76   10.20
  -4  -3  -1  378.36   25.10
   4  -3   1  373.26   10.30
  -4  -3  -1  381.26   10.80
   4  -3   1  389.66   10.40
  -4  -3  -1  373.96   10.40
   4  -3   1  403.46   22.40
  -4   3  -2  130.59    4.50
   4   3   2  134.69    5.30
  -4   3  -2  136.49    6.70
   4   3   2  136.39   19.70
  -4   3  -2  134.59   16.40
  -4  -3  -2  131.69    5.30
  -4  -3  -2  143.39   21.30
   4  -3   2  134.89    5.00
  -4  -3  -2  138.99    5.90
  -4  -3  -2  129.19    4.60
   4  -3   2  166.28   17.90
   4  -3   2  135.39    4.60
   4   3   3  104.49   17.00
  -4   3  -3   92.99    6.50
   4   3   3  102.49    4.50
  -4   3  -3  100.79    4.20
  -4   3  -3   89.39   15.30
   4   3   3  105.59    4.00
  -4  -3  -3   89.39    4.80
   4  -3   3   99.19    5.10
   4  -3   3  103.79    4.20
   4  -3   3  103.99   15.90
  -4  -3  -3   92.69    5.00
  -4  -3  -3  121.39   19.00
   4   3   4  511.35   28.40
  -4   3  -4  478.25   14.20
   4   3   4  469.65   12.30
  -4   3  -4  469.05   27.60
   4   3   4  474.85   12.50
  -4   3  -4  486.15   12.40
   4  -3   4  468.25   13.10
   4  -3   4  482.95   12.40
  -4  -3  -4  472.65   13.20
  -4  -3  -4  475.95   13.00
  -4  -3  -4  487.15   29.30
   4  -3   4  485.15   26.80
  -4   3  -5   62.99    7.10
  -4   3  -5   77.19    3.90
   4   3   5   91.69   17.10
   4   3   5   86.89    4.10
   4   3   5   80.29    4.10
  -4   3  -5   47.30   16.20
  -4  -3  -5   74.09    5.50
   4  -3   5   75.29    5.20
  -4  -3  -5   75.19    4.80
   4  -3   5   89.19    4.20
  -4  -3  -5   86.39   17.30
   4  -3   5   60.59   15.40
   4   3   6  126.29   19.80
  -4   3  -6  122.49   21.10
  -4   3  -6  120.49    8.20
  -4   3  -6  129.09    5.10
   4   3   6  119.19    5.10
   4  -3   6  130.59   20.30
  -4  -3  -6  122.39   22.10
   4  -3   6  119.89    7.00
  -4  -3  -6  129.19    6.20
   4  -3   6  137.89    5.00
  -4  -3  -6  129.49    6.70
   4   3   7  218.78    7.10
  -4   3  -7  233.18    7.20
   4   3   7  217.08   24.60
  -4   3  -7  216.58   10.20
  -4   3  -7  203.68   28.80
   4  -3   7  215.98    9.20
   4  -3   7  207.58   26.30
  -4  -3  -7  222.38   26.50
   4  -3   7  227.68    6.80
  -4  -3  -7  231.38    8.10
  -4  -3  -7  240.58    8.90
  -4   3  -8  103.99    9.00
  -4   3  -8   93.49   21.60
   4   3   8  127.19   23.50
   4   3   8  107.79    5.40
  -4   3  -8  110.09    4.90
   4  -3   8  116.39   22.50
   4  -3   8   91.09    8.10
  -4  -3  -8  110.19   23.20
   4  -3   8  112.29    5.00
  -4  -3  -8  115.49    8.30
  -4  -3  -8  112.69    6.10
  -4   3  -9  433.86   15.10
   4   3   9  448.76   35.70
  -4   3  -9  474.55   39.20
  -4   3  -9  435.76   12.00
   4   3   9  414.76   12.20
   4  -3   9  466.55   36.40
  -4  -3  -9  426.76   13.70
  -4  -3  -9  444.56   12.80
   4  -3   9  425.46   11.60
   4  -3   9  429.86   14.20
  -4  -3  -9  467.45   38.70
  -4   3 -10   48.00    7.00
   4   3  10   55.29   21.00
   4   3  10   44.70    4.20
  -4   3 -10   42.70    4.00
  -4   3 -10   15.50   25.40
  -4  -3 -10   23.30   23.20
   4  -3  10   47.20    3.90
   4  -3  10   44.10    6.80
  -4  -3 -10   46.10    4.30
   4  -3  10   87.69   22.60
  -4  -3 -10   40.00    6.00
   4   3  11   35.80    4.30
  -4   3 -11   33.80    7.10
  -4   3 -11   29.00    4.00
   4   3  11  103.19   26.10
  -4   3 -11   37.20   25.70
  -4  -3 -11   34.10    6.30
  -4  -3 -11   17.20   28.10
   4  -3  11   29.00    6.30
  -4  -3 -11   32.60    4.10
   4  -3  11   83.09   25.00
   4  -3  11   36.60    4.50
  -4   3 -12    7.90   29.90
  -4   3 -12    3.20    4.00
  -4   3 -12    2.30    7.30
   4   3  12    0.10    4.20
  -4  -3 -12    4.00    3.80
  -4  -3 -12   13.20   30.20
  -4  -3 -12    6.50    6.90
   4  -3  12   -1.40    6.70
   4  -3  12   -0.20   28.40
  -4   3 -13   -5.40   37.30
   4   3  13  -18.60   29.50
  -4   3 -13    7.10    4.20
  -4   3 -13   11.70    7.80
   4   3  13    7.80    4.70
   4  -3  13    9.40    8.00
  -4  -3 -13   14.10   36.10
  -4  -3 -13    8.40    4.10
  -4  -3 -13    5.30    7.20
   4  -3  13   -5.20   27.20
  -4   3 -14   12.40    4.70
   4   3  14   17.10    5.20
  -4   3 -14   14.80   11.80
   4  -3  14    9.30    8.40
  -4  -3 -14   15.10    4.20
  -4  -3 -14   16.20    6.90
   4   3  15    9.70    5.50
   4  -3  15   -2.90    8.00
  -4  -3 -15    3.50    8.20
  -4   3 -16    0.00    5.40
  -4  -3 -16    5.80    8.60
   4  -3  16    8.60    9.30
   4  -3  17    0.00   10.30
  -4  -3 -17   -2.50    9.00
   4  -3  18  -11.00   11.40
  -4  -3 -18   16.30    9.80
  -4  -4  18   -2.10   10.90
   4  -4 -18    7.30    9.30
  -4  -4  17    0.80    9.90
   4  -4 -17   12.60    8.80
   4  -4 -16   16.20    5.20
  -4  -4  16   -8.50    9.40
   4  -4 -16   17.40    8.50
   4  -4 -15   26.20    7.90
  -4  -4  15   41.90    9.80
   4  -4 -15   33.40    5.40
  -4   4  14   -4.90   28.80
   4  -4 -14   39.30   27.60
   4  -4 -14   27.80    6.80
   4  -4 -14   36.70    5.30
  -4  -4  14   15.50    8.80
  -4   4  13  107.49   27.10
   4   4 -13  122.39   12.90
   4  -4 -13  130.09   26.80
   4  -4 -13  100.79    9.20
   4  -4 -13  127.49    8.00
  -4  -4  13  110.69    9.60
  -4  -4  13   98.39   28.30
   4   4 -12   -5.50    7.20
  -4   4  12  -23.20   22.50
   4  -4 -12    3.50    4.30
  -4  -4  12  -10.00    6.50
  -4  -4  12   24.40   22.60
   4  -4 -12  -12.60   20.50
   4  -4 -12    3.40    6.30
  -4   4  11  141.89   24.30
   4   4 -11  124.19   11.60
  -4  -4  11  125.09    4.90
   4  -4 -11  137.49    7.70
  -4  -4  11  129.69    9.30
  -4  -4  11  164.38   26.30
   4  -4 -11  116.19    9.20
   4  -4 -11  136.99   22.50
  -4   4  10   57.29   20.10
   4   4 -10   34.40    7.00
   4  -4 -10   57.29   19.20
   4  -4 -10   47.90    4.60
  -4  -4  10   30.80    6.00
   4  -4 -10   42.00    5.40
  -4  -4  10   56.39    4.10
  -4  -4  10   66.19   22.50
  -4   4   9  224.68   26.60
   4   4  -9  248.98   12.20
   4  -4  -9  220.58   26.30
   4  -4  -9  241.88    9.30
  -4  -4   9  255.37    7.60
  -4  -4   9  258.27   11.00
   4   4  -8   -4.90    5.60
  -4   4   8   20.90   16.50
   4  -4  -8   -3.40    4.10
   4  -4  -8    1.30    2.50
   4  -4  -8   -6.30    3.50
  -4  -4   8   -0.50    2.70
  -4  -4   8   -1.90    5.00
   4  -4  -8   -9.20   14.10
  -4   4   7  372.36   10.20
   4   4  -7  362.66   13.50
  -4   4   7  399.16   27.80
   4  -4  -7  362.96   11.20
  -4  -4   7  349.57   10.40
   4  -4  -7  387.26   26.90
  -4  -4   7  369.66   12.00
   4  -4  -7  361.46   10.80
  -4   4   6   61.79    4.40
  -4   4   6   56.69   15.40
   4   4  -6   50.49    5.80
   4  -4  -6   49.70   16.00
  -4  -4   6   51.19    5.50
  -4  -4   6   56.09   18.40
   4  -4  -6   52.59    5.20
  -4  -4   6   51.09    4.80
   4  -4  -6   55.79    5.50
  -4   4   5  374.06   25.70
  -4   4   5  426.76   11.50
   4   4  -5  403.76   13.10
   4   4  -5  369.66   31.80
  -4  -4   5  421.76   11.80
   4  -4  -5  431.16   10.40
   4  -4  -5  444.56   28.90
  -4  -4   5  416.56   12.00
   4  -4  -5  420.46   11.70
  -4  -4   5  404.86   32.20
   4  -4  -5  412.96   11.80
   4   4  -4  390.36   12.80
  -4   4   4  388.06   25.00
  -4   4   4  402.96   11.20
   4   4  -4  413.76   30.10
  -4  -4   4  400.96   11.30
   4  -4  -4  392.06   11.10
  -4  -4   4  400.16   11.60
   4  -4  -4  350.86   26.30
  -4  -4   4  389.56   10.00
   4  -4  -4  410.56   10.00
  -4  -4   4  329.37   28.30
   4   4  -3  133.49   21.60
   4   4  -3  200.98    8.50
  -4   4   3  151.28   19.20
  -4   4   3  184.68    6.80
   4  -4  -3  195.28    6.70
  -4  -4   3  191.48    5.70
  -4  -4   3  165.58   23.50
  -4  -4   3  194.18    7.20
  -4  -4   3  189.68    7.00
   4  -4  -3  178.88   23.70
   4  -4  -3  191.78    5.60
  -4   4   2 1265.47   31.60
   4   4  -2 1238.78   50.79
  -4   4   2 1257.77   31.30
   4   4  -2 1234.58   32.00
  -4  -4   2 1258.77   31.20
  -4  -4   2 1250.37   31.40
  -4  -4   2 1276.67   30.90
   4  -4  -2 1283.87   48.00
   4  -4  -2 1247.88   31.40
   4  -4  -2 1279.97   30.80
  -4  -4   2 1306.57   52.79
  -4   4   1  571.74   14.90
  -4   4   1  571.84   15.80
   4   4  -1  603.44   35.30
   4   4  -1  566.44   15.90
   4  -4  -1  568.34   15.20
  -4  -4   1  569.84   14.90
  -4  -4   1  564.84   15.30
  -4  -4   1  514.65   33.30
   4  -4  -1  583.24   14.60
   4  -4  -1  581.54   29.00
   4  -4  -1  557.34   31.50
  -4  -4   1  588.64   14.80
  -4   4   0 1552.24   38.30
  -4   4   0 1561.24   39.10
   4   4   0 1506.45   38.90
   4   4   0 1634.24   59.79
   4  -4   0 1584.74   55.09
   4  -4   0 1538.25   53.79
   4  -4   0 1540.85   38.50
  -4  -4   0 1570.84   38.40
   4  -4   0 1599.14   38.30
  -4  -4   0 1604.44   38.30
  -4  -4   0 1570.54   38.90
  -4  -4   0 1586.74   58.69
  -4   4  -1  320.27   10.80
  -4   4  -1  318.57    9.30
   4   4   1  319.97   10.00
   4   4   1  342.87   26.60
  -4  -4  -1  332.17   10.20
   4  -4   1  311.27    9.30
  -4  -4  -1  306.97   30.30
  -4  -4  -1  327.07    9.70
   4  -4   1  324.47    9.40
  -4  -4  -1  310.07    9.00
   4  -4   1  321.27   25.10
   4  -4   1  368.56   26.50
   4   4   2 1456.65   55.19
  -4   4  -2 1443.06   36.30
  -4   4  -2 1439.16   35.10
   4  -4   2 1488.85   54.09
  -4  -4  -2 1403.96   34.90
   4  -4   2 1397.56   51.29
  -4  -4  -2 1419.56   35.50
   4  -4   2 1464.45   35.40
  -4  -4  -2 1386.56   55.79
   4  -4   2 1414.46   35.30
  -4  -4  -2 1466.95   35.80
   4   4   3  135.59   21.30
  -4   4  -3  107.79    7.00
   4   4   3  124.29    5.70
  -4   4  -3  108.99    5.00
   4  -4   3  155.08   21.30
  -4  -4  -3  117.99    6.00
   4  -4   3  126.49    6.20
   4  -4   3  124.09    5.60
  -4  -4  -3  127.49   23.60
   4  -4   3  153.78   22.20
  -4  -4  -3  115.69    6.10
   4   4   4  783.12   39.40
  -4   4  -4  792.52   19.80
   4   4   4  765.52   19.50
  -4   4  -4  769.92   21.40
   4   4   4  766.52   20.00
  -4  -4  -4  797.02   20.70
   4  -4   4  763.72   39.10
   4  -4   4  813.52   20.70
  -4  -4  -4  795.92   20.60
  -4  -4  -4  793.62   43.10
   4  -4   4  799.22   20.10
   4   4   5   24.00    3.00
  -4   4  -5   18.90    5.40
   4   4   5   37.60   17.60
  -4   4  -5   16.70    2.90
   4   4   5   24.90    2.60
  -4   4  -5   14.70   17.80
  -4  -4  -5   22.50    4.90
   4  -4   5   21.20    3.10
   4  -4   5   20.00    4.50
   4  -4   5   34.50   18.30
  -4  -4  -5   20.10    3.80
  -4  -4  -5   24.00   21.00
  -4   4  -6  470.05   15.50
   4   4   6  484.75   13.10
  -4   4  -6  513.95   34.80
  -4   4  -6  502.35   13.20
   4   4   6  536.15   35.90
   4   4   6  484.55   13.30
  -4  -4  -6  535.45   14.70
   4  -4   6  523.75   13.70
  -4  -4  -6  530.15   36.10
  -4  -4  -6  511.45   14.80
   4  -4   6  469.35   32.40
   4  -4   6  500.55   15.00
  -4   4  -7  175.08    6.20
  -4   4  -7  182.18   10.50
   4   4   7  180.08    6.20
   4   4   7  201.88   29.80
  -4   4  -7  211.78   33.80
   4   4   7  180.08    6.20
  -4  -4  -7  203.98   30.60
   4  -4   7  189.08   26.70
   4  -4   7  175.08    6.80
  -4  -4  -7  189.88    8.30
  -4   4  -8  -37.00   23.30
   4   4   8   20.90    2.80
   4   4   8   -9.50   21.50
  -4   4  -8   11.90    3.20
  -4   4  -8    6.20    6.40
   4   4   8   22.30    3.00
   4  -4   8   12.40    3.10
   4  -4   8   18.80   22.30
  -4  -4  -8   16.90    5.40
  -4  -4  -8   20.70    4.60
  -4  -4  -8   54.39   26.30
   4  -4   8    5.80    5.80
   4   4   9   10.50    3.00
  -4   4  -9   -4.90    6.30
   4   4   9    2.20   24.20
  -4   4  -9  -24.20   23.20
  -4   4  -9    5.60    3.20
   4  -4   9   52.59   23.60
  -4  -4  -9    1.80    6.40
  -4  -4  -9    4.50    4.30
   4  -4   9   -0.60    6.20
   4  -4   9    5.20    3.10
  -4  -4  -9   39.90   28.10
   4   4  10   59.59   27.70
   4   4  10    7.20    3.30
  -4   4 -10   -9.20    7.00
  -4   4 -10   44.10   30.70
  -4   4 -10   -0.80    3.30
   4  -4  10   38.20   26.70
   4  -4  10  -10.50    6.50
  -4  -4 -10   22.30   26.90
   4  -4  10   -3.90    3.00
  -4  -4 -10   -2.60    4.50
  -4  -4 -10   -0.30    6.00
  -4   4 -11   86.29    5.60
  -4   4 -11   78.09   33.30
   4   4  11   89.39   27.30
   4   4  11   95.69    5.90
  -4   4 -11   95.69   11.80
  -4  -4 -11   87.09    7.90
   4  -4  11  100.89   31.10
  -4  -4 -11  121.29   34.90
   4  -4  11   91.49    8.40
   4  -4  11   94.99    5.10
  -4  -4 -11   89.49    9.30
  -4   4 -12   27.50   36.30
   4   4  12   35.50   32.60
  -4   4 -12   19.60    4.00
  -4   4 -12   24.80    8.60
   4   4  12   26.70    3.90
   4  -4  12   14.50   31.60
  -4  -4 -12   21.80    7.80
   4  -4  12   24.00    8.20
  -4  -4 -12   60.19   35.80
  -4   4 -13   76.39    6.30
   4   4  13   91.29    6.60
  -4  -4 -13   68.79    6.80
  -4  -4 -13  112.49   12.20
   4  -4  13   85.59    9.50
  -4   4 -14    1.40    4.20
   4  -4  14   -2.40    8.70
  -4  -4 -14   -2.60    7.70
  -4  -4 -14   -2.80    5.00
  -4  -4 -15   37.00    9.50
  -4  -4 -15   30.40    5.40
   4  -4  15   30.80    9.70
  -4  -4 -16   11.40    9.70
   4  -4  16    9.20    9.80
  -4  -4 -17    3.30   10.20
   4  -4  17   -0.70   11.30
   4  -5 -18   15.10   10.40
   4  -5 -17   29.80    9.90
  -4  -5  17   16.80   11.60
   4  -5 -16   21.70    9.30
  -4  -5  16   17.50   10.60
   4  -5 -16   30.80    6.40
  -4  -5  15   56.59    9.80
   4  -5 -15   65.49    9.50
   4  -5 -15   84.09    9.60
   4  -5 -14   28.20    8.20
   4  -5 -14   25.80    5.90
  -4  -5  14   16.20    9.60
  -4   5  13   56.59   33.20
   4  -5 -13   64.29    6.20
   4  -5 -13   71.59    8.20
  -4  -5  13   47.30    8.60
   4  -5 -13   17.20   33.80
  -4   5  12   47.20   27.80
   4  -5 -12   18.90    5.30
   4  -5 -12   68.09   26.60
   4  -5 -12   21.70    6.60
  -4  -5  12   16.70    2.90
  -4  -5  12   29.50    8.70
   4   5 -11   48.20    8.80
  -4   5  11   70.29   26.40
   4  -5 -11   43.10    5.50
  -4  -5  11   42.40    3.60
   4  -5 -11  107.69   25.60
   4  -5 -11   35.40    6.20
  -4  -5  11   49.80    8.40
   4   5 -10    1.10    7.60
  -4   5  10   44.40   23.60
  -4  -5  10    4.70    3.50
  -4  -5  10   11.50    7.10
   4  -5 -10    6.70    5.40
   4  -5 -10    6.90    5.00
   4  -5 -10   20.30   22.20
  -4  -5  10  -16.00   26.90
  -4   5   9   42.00   22.00
   4   5  -9   25.20    7.20
  -4  -5   9   26.50    6.50
   4  -5  -9   35.80    5.70
  -4  -5   9   -4.40   23.40
  -4  -5   9   31.70    3.90
   4  -5  -9   12.40   20.00
   4   5  -8   44.60    6.90
  -4   5   8   50.39    4.30
  -4   5   8   53.69   21.20
  -4  -5   8   52.29    6.00
  -4  -5   8   49.99    5.60
   4  -5  -8   50.29    5.30
   4  -5  -8   48.00   20.90
   4  -5  -8   59.19    6.20
  -4  -5   8   79.29   22.30
  -4   5   7   52.69   19.90
  -4   5   7   56.29    4.80
   4   5  -7   47.10    6.70
  -4  -5   7   37.60    8.30
   4  -5  -7   37.60    4.60
  -4  -5   7   53.89    6.00
   4  -5  -7   59.19   21.00
   4  -5  -7   52.69    5.70
  -4  -5   7   68.39   24.10
   4   5  -6  222.48   11.40
  -4   5   6  203.68   26.30
  -4   5   6  222.78    7.70
  -4  -5   6  227.48    8.70
   4  -5  -6  230.28    9.20
   4  -5  -6  224.78   30.70
  -4  -5   6  222.88    9.60
   4  -5  -6  220.68    8.80
  -4   5   5   49.00   17.80
   4   5  -5   59.49    6.60
   4  -5  -5   56.89   20.30
  -4  -5   5   58.69    5.90
  -4  -5   5   42.60    3.20
   4  -5  -5   49.60    5.70
  -4  -5   5   52.99    5.20
   4  -5  -5   41.10    4.40
   4  -5  -5   57.79    3.00
   4   5  -4  444.36   35.90
  -4   5   4  488.65   31.30
   4   5  -4  479.45   15.20
  -4   5   4  452.95   13.20
  -4  -5   4  460.45   12.00
   4  -5  -4  423.16   33.90
  -4  -5   4  481.65   13.60
   4  -5  -4  455.55   13.30
  -4  -5   4  462.15   13.50
   4  -5  -4  450.25   13.50
   4  -5  -4  472.25   11.80
   4   5  -3   27.00   19.50
  -4   5   3   34.70    4.40
   4   5  -3   28.70    5.00
  -4  -5   3   36.20    3.90
  -4  -5   3   33.20    3.10
   4  -5  -3   29.10    4.00
   4  -5  -3   32.70    3.50
  -4  -5   3   27.60    3.90
  -4  -5   3   34.40   24.10
   4  -5  -3   18.20   18.70
   4   5  -2  122.59    7.90
   4   5  -2  123.69   25.50
  -4   5   2  116.79    7.20
   4  -5  -2  109.29    6.80
   4  -5  -2  156.48   24.60
  -4  -5   2  109.79    5.80
   4  -5  -2  113.69    5.00
  -4  -5   2  114.29    6.50
  -4  -5   2  114.19    5.40
  -4  -5   2  132.49   25.20
   4   5  -1   19.90   21.50
  -4   5   1   20.80    4.70
   4   5  -1   21.90    4.50
  -4   5   1   23.00    3.70
   4  -5  -1   22.20   18.60
   4  -5  -1   16.50    4.00
  -4  -5   1    0.70   22.60
   4  -5  -1   25.00    3.00
  -4  -5   1   24.80    3.30
  -4  -5   1   19.80    4.00
  -4  -5   1   24.60    3.50
   4  -5  -1   48.60   20.20
   4   5   0   56.89   22.00
  -4   5   0   37.30    5.20
  -4   5   0   39.60    4.10
   4   5   0   36.60    4.60
   4  -5   0   35.20   17.20
   4  -5   0   28.80    3.80
  -4  -5   0   39.90    4.40
  -4  -5   0   44.30    3.50
   4  -5   0   38.70    4.30
  -4  -5   0   65.69   21.90
  -4  -5   0   37.50    3.80
   4  -5   0   13.10   17.80
   4   5   1  251.17   28.30
  -4   5  -1  235.08    9.90
   4   5   1  241.38    9.20
  -4   5  -1  240.48    8.10
   4  -5   1  227.98   27.70
   4  -5   1  242.48    8.00
  -4  -5  -1  235.68    9.50
  -4  -5  -1  238.68    7.60
   4  -5   1  228.68    8.60
  -4  -5  -1  248.98   30.60
  -4  -5  -1  234.48    8.60
   4  -5   1  282.17   27.50
  -4   5  -2   17.00    3.50
   4   5   2   63.99   22.50
  -4   5  -2    9.80    5.00
   4   5   2   20.80    4.10
   4  -5   2   42.50   19.90
   4  -5   2   13.10   19.30
   4  -5   2   17.60    3.80
  -4  -5  -2   13.30    3.90
  -4  -5  -2   16.20    2.80
  -4  -5  -2    5.90   21.00
  -4  -5  -2   12.70    4.10
   4  -5   2   17.60    3.80
  -4   5  -3  187.98    6.80
   4   5   3  189.08    7.90
  -4   5  -3  183.58    9.90
   4   5   3  173.48   27.00
  -4  -5  -3  194.68    9.00
   4  -5   3  196.28    7.60
  -4  -5  -3  170.58    6.10
   4  -5   3  195.28   26.20
  -4  -5  -3  207.68   30.30
   4  -5   3  190.48    7.90
   4  -5   3  197.78   27.00
  -4  -5  -3  186.68    8.50
   4   5   4   97.89   23.00
  -4   5  -4   79.89    8.80
   4   5   4   68.99    4.30
  -4   5  -4   69.59    4.90
   4   5   4   79.69    9.90
   4  -5   4   79.19    6.00
  -4  -5  -4   71.29   26.00
   4  -5   4  103.59   23.90
   4  -5   4   82.59    6.70
  -4  -5  -4   71.99    6.70
  -4  -5  -4   71.29    7.50
   4  -5   4   80.49   21.30
   4   5   5  279.67    9.20
  -4   5  -5  273.27   12.30
   4   5   5  254.57    8.00
   4   5   5  279.07   31.00
  -4   5  -5  280.77    8.70
   4  -5   5  277.97   30.90
  -4  -5  -5  273.87   10.10
  -4  -5  -5  287.27   11.00
   4  -5   5  287.77    9.60
   4  -5   5  264.67   31.60
  -4  -5  -5  248.18   33.60
   4  -5   5  276.07   10.40
  -4   5  -6   26.00    6.60
   4   5   6   39.00    3.80
   4   5   6   48.30    5.20
  -4   5  -6   35.90    3.60
   4   5   6   27.60   21.00
  -4  -5  -6   53.49   27.60
   4  -5   6   56.49   22.70
  -4  -5  -6   37.80    6.00
  -4  -5  -6   29.90    5.60
   4  -5   6   33.40    5.90
   4  -5   6   54.79   25.30
   4  -5   6   39.30    4.20
   4   5   7   34.40    2.90
  -4   5  -7   23.60    7.00
   4   5   7   85.79   25.60
   4   5   7   38.50    4.60
  -4   5  -7   31.60    3.70
   4  -5   7   25.20    6.00
   4  -5   7   27.10    4.10
   4  -5   7   26.80   22.30
  -4  -5  -7   28.80    5.90
  -4  -5  -7   27.00   27.70
   4   5   8   78.19    4.30
  -4   5  -8   70.29    5.20
  -4   5  -8   74.59    8.50
   4   5   8   82.69   25.20
  -4  -5  -8   60.69    6.70
   4  -5   8   58.99    7.00
   4  -5   8   76.29    6.20
  -4  -5  -8   73.89    6.20
   4  -5   8   57.19   25.60
  -4  -5  -8   54.09   32.10
   4   5   9   43.60   28.20
  -4   5  -9    0.70    3.50
   4   5   9    2.30    2.50
  -4   5  -9   -4.20    6.80
   4  -5   9   -0.80    3.80
  -4  -5  -9    4.50    5.30
   4  -5   9  -28.40   28.00
  -4  -5  -9   -8.80    6.80
   4  -5   9   -1.80    6.70
  -4  -5  -9   -3.80   31.80
   4   5  10  100.59   31.10
  -4  -5 -10   42.00   36.70
   4  -5  10   30.10   31.30
  -4   5 -11   61.69   39.30
   4   5  11   36.80   34.20
  -4   5 -11   13.40    3.80
  -4  -5 -11   12.90    5.90
  -4  -5 -11    1.70   33.60
   4  -5  11    9.60    7.80
   4  -5  11   -2.00   35.90
  -4  -5 -11   14.00    7.40
   4  -5  11   15.20    3.70
  -4   5 -12   77.79   59.69
  -4   5 -12    4.90    3.90
   4  -5  12   -8.40   36.70
  -4  -5 -12   15.70    8.50
   4  -5  12   -7.10    8.40
  -4  -5 -12    3.80    5.60
  -4   5 -13   -0.80    4.70
  -4  -5 -13    3.80    5.80
   4  -5  13    3.30    8.80
  -4  -5 -13    0.20    7.90
  -4  -5 -14   12.10    8.70
  -4  -5 -14    0.50    6.00
   4  -5  14   -1.70    9.10
  -4  -5 -15   -4.40    6.20
  -4  -5 -15    8.70   10.10
   4  -5  15   15.60    9.30
  -4  -5 -16    0.10   10.60
   4  -5  16    7.30   11.70
   4  -6 -17    6.70   11.60
   4  -6 -16   15.80   10.30
  -4  -6  16   -0.30   11.50
   4  -6 -16   15.10    6.80
  -4  -6  15   -0.40    9.50
   4  -6 -15    8.60    9.60
   4  -6 -15   15.40    6.80
   4  -6 -14   -2.70    8.00
   4  -6 -14    4.50    6.10
  -4  -6  14   -3.80   10.00
   4  -6 -13    4.90    8.30
   4  -6 -13   15.40    6.50
  -4  -6  13    6.00    8.40
  -4  -6  12   -1.90    3.90
  -4  -6  12   -4.60    8.60
   4  -6 -12    8.00    6.10
   4  -6 -12    5.00    8.00
  -4   6  11   47.80   30.80
   4  -6 -11   -3.00    6.40
  -4  -6  11   -6.50    8.10
   4  -6 -11  -11.30   30.20
   4  -6 -11    0.00    5.70
  -4   6  10  -13.60   27.80
  -4  -6  10    9.40    4.40
   4  -6 -10   20.20    6.40
  -4  -6  10    9.10    6.70
  -4  -6  10   77.99   33.20
   4  -6 -10  -43.50   27.60
   4  -6 -10   15.00    5.80
  -4   6   9   15.20   27.30
   4   6  -9    7.80    8.20
  -4  -6   9   12.50   30.00
   4  -6  -9   37.80   27.30
   4  -6  -9    8.70    6.70
  -4  -6   9    8.70    7.10
  -4  -6   9    5.40    4.40
   4  -6  -9   10.40    5.70
  -4   6   8    1.70   24.90
   4   6  -8   12.00    7.30
  -4   6   8    7.00    3.30
  -4  -6   8    7.30    6.50
   4  -6  -8   -2.70    5.30
   4  -6  -8    6.10    5.60
  -4  -6   8   13.20   29.20
  -4  -6   8   -0.60    4.60
   4  -6  -8    2.50   24.60
  -4   6   7    8.10    3.80
  -4   6   7   -0.40   23.60
   4   6  -7   15.70    7.40
  -4  -6   7    7.20    4.70
   4  -6  -7   10.70    5.50
   4  -6  -7   -1.60    5.30
  -4  -6   7   11.00    6.10
  -4  -6   7   24.40   24.10
   4  -6  -7   20.00   25.50
   4   6  -6    8.80    6.70
  -4   6   6    0.80    4.10
  -4   6   6   10.00   22.80
   4  -6  -6   24.60   24.20
   4  -6  -6   -0.10    5.30
  -4  -6   6    4.50    4.70
   4  -6  -6    2.40    5.00
  -4  -6   6   -3.60    2.00
  -4  -6   6    3.20    5.60
  -4   6   5  290.97   33.80
  -4   6   5  302.27   10.60
   4   6  -5  324.47   13.40
  -4  -6   5  303.37   10.90
  -4  -6   5  276.67    8.40
   4  -6  -5  309.27   11.40
   4  -6  -5  279.17    8.10
   4  -6  -5  274.67   10.70
  -4  -6   5  282.47   14.20
   4  -6  -5  340.67   39.30
   4   6  -4   33.60    6.50
  -4   6   4   32.70    5.10
  -4  -6   4   33.10    5.10
   4  -6  -4   31.70    2.60
  -4  -6   4   39.10    5.40
   4  -6  -4  -16.20   24.20
   4  -6  -4   21.60    5.50
   4  -6  -4   22.80    5.50
  -4  -6   4   28.50    3.30
   4   6  -3  295.27   12.30
   4   6  -3  291.67   52.69
  -4   6   3  294.37   10.80
  -4  -6   3  284.27   10.10
   4  -6  -3  270.57    9.90
   4  -6  -3  292.27    8.40
   4  -6  -3  275.27   11.10
  -4  -6   3  304.57   11.30
   4  -6  -3  290.07   36.90
  -4  -6   3  290.47    9.20
   4   6  -2  -12.20   24.90
  -4   6   2   11.30    5.20
  -4   6   2    3.30   18.40
   4   6  -2    8.20    5.50
  -4  -6   2    9.30    5.20
   4  -6  -2   -3.40   22.40
   4  -6  -2    8.60    4.10
   4  -6  -2    6.60    7.30
   4  -6  -2   11.60    3.00
  -4  -6   2    8.10    3.70
  -4  -6   2    6.40    3.90
   4   6  -1  819.72   53.59
  -4   6   1  830.92   22.60
   4   6  -1  795.02   22.70
  -4  -6   1  820.62   21.20
  -4  -6   1  799.52   52.19
  -4  -6   1  796.62   21.10
  -4  -6   1  799.62   22.00
   4  -6  -1  859.21   46.60
   4  -6  -1  812.52   20.70
   4   6   0  123.59   31.10
   4   6   0  125.99    9.10
  -4   6   0  115.69    9.60
  -4  -6   0  132.39   30.80
   4  -6   0  116.09    6.30
  -4  -6   0  122.49    6.30
   4  -6   0  110.79    8.10
   4  -6   0  103.79   26.70
  -4  -6   0  137.39    7.10
  -4   6  -1  609.24   16.20
   4   6   1  597.94   42.80
  -4   6  -1  604.54   18.00
   4   6   1  594.44   17.40
   4  -6   1  586.14   16.00
  -4  -6  -1  585.74   45.80
  -4  -6  -1  515.25   18.60
  -4  -6  -1  580.54   16.30
  -4  -6  -1  612.14   15.70
   4  -6   1  602.64   16.90
   4  -6   1  572.94   40.70
  -4   6  -2   97.79    6.30
  -4   6  -2   90.49    9.50
   4   6   2   89.39    7.80
   4   6   2   74.49   27.90
   4  -6   2   95.89    6.60
  -4  -6  -2   86.89    5.30
  -4  -6  -2   82.59    6.70
   4  -6   2   88.19    7.60
  -4  -6  -2  104.49    8.80
  -4  -6  -2   97.09   32.60
   4  -6   2   74.59   23.60
  -4   6  -3  778.72   22.40
   4   6   3  762.12   20.80
   4   6   3  810.12   47.00
  -4   6  -3  776.02   19.80
   4  -6   3  753.82   20.60
  -4  -6  -3  738.13   21.00
   4  -6   3  732.33   49.30
  -4  -6  -3  753.32   20.60
  -4  -6  -3  703.03   19.10
  -4  -6  -3  827.82   55.49
   4  -6   3  759.92   20.60
  -4   6  -4   54.99    6.10
   4   6   4   57.29   24.80
  -4   6  -4   54.09    7.40
   4   6   4   67.09    7.20
  -4  -6  -4   46.60    5.70
  -4  -6  -4   78.49   30.40
  -4  -6  -4   57.79    6.50
   4  -6   4   43.50   25.00
   4  -6   4   55.69    5.40
   4  -6   4   59.79    6.40
  -4   6  -5  303.77   14.00
   4   6   5  328.07   40.10
  -4   6  -5  304.37    9.70
   4   6   5  262.77    8.50
   4   6   5  302.47   10.20
  -4  -6  -5  316.37   12.40
   4  -6   5  290.37   10.70
  -4  -6  -5  289.97   11.30
   4  -6   5  288.47   39.10
  -4  -6  -5  304.97   41.50
   4  -6   5  286.97   11.40
  -4   6  -6   33.20    7.60
   4   6   6   40.70    3.90
   4   6   6   43.60    6.10
  -4   6  -6   40.40    4.30
   4   6   6   26.80   25.90
  -4  -6  -6   36.20    6.40
   4  -6   6   37.10    6.40
  -4  -6  -6   36.10    5.70
  -4  -6  -6   28.90   29.10
   4  -6   6   30.80    5.10
   4  -6   6   69.39   30.40
   4   6   7   64.39   26.90
  -4   6  -7   55.39    8.50
  -4   6  -7   60.59    5.70
   4   6   7   66.09    3.80
   4   6   7   65.09    5.60
  -4  -6  -7   65.89    7.00
   4  -6   7   62.09    7.30
  -4  -6  -7   62.39    6.60
   4  -6   7   57.79    5.50
   4  -6   7  144.69   57.99
  -4  -6  -7   68.79   35.90
  -4   6  -8   23.30    9.20
  -4   6  -8   17.50    4.00
   4   6   8   52.49   28.60
  -4  -6  -8   20.90    6.70
   4  -6   8   13.60    4.80
   4  -6   8    7.00    6.20
  -4  -6  -8  -26.70   31.50
  -4  -6  -8   17.70    6.10
   4   6   9   59.69   34.80
  -4   6  -9   13.30    3.90
   4  -6   9    4.70    7.30
  -4  -6  -9   13.10    7.00
  -4  -6  -9   14.60    6.30
  -4  -6  -9   55.29   37.50
   4  -6   9   12.80    4.80
  -4   6 -10    0.80    4.00
   4  -6  10    1.80    4.60
  -4  -6 -10    5.60    8.10
  -4  -6 -10   70.99   58.39
  -4  -6 -10   -4.80    6.30
   4  -6  10    4.30    8.10
  -4   6 -11    1.40    4.00
  -4  -6 -11   -7.10    6.30
   4  -6  11    4.40    4.40
   4  -6  11  -11.10    7.30
  -4  -6 -11   10.40    7.70
  -4  -6 -12   -0.70    6.80
   4  -6  12    4.60    9.00
  -4  -6 -12   -6.80    9.10
   4  -6  13    3.40    8.80
  -4  -6 -13   -1.60    8.50
  -4  -6 -13   -9.50    6.60
   4  -6  14    3.20   10.60
  -4  -6 -14   -5.20    6.70
  -4  -6 -14    4.20   10.30
   4  -6  15  -10.60   14.90
  -4  -6 -15  -11.00    6.90
  -4  -6 -15    5.20   10.10
  -4  -7  15   30.40   15.00
   4  -7 -15   37.10    7.90
   4  -7 -15   34.50   10.90
   4  -7 -14    8.60    7.50
   4  -7 -14   -4.80    9.60
  -4  -7  14  -12.70   10.40
  -4  -7  13   11.40   10.50
   4  -7 -13   15.50    7.30
   4  -7 -13    3.50    9.20
  -4  -7  12  -15.00    6.00
  -4  -7  12  -10.90    9.60
   4  -7 -12    4.00    7.00
   4  -7 -12    6.20    7.80
  -4  -7  11    6.60    9.20
   4  -7 -11    8.40    6.50
   4  -7 -11    6.60    8.40
  -4  -7  11    2.70    5.20
   4  -7 -10   -1.00    6.90
  -4  -7  10   -5.90    5.20
   4  -7 -10    1.80    6.30
  -4  -7  10  -11.80    8.20
  -4   7   9    3.40   48.60
   4  -7  -9    2.00    6.50
   4  -7  -9  -16.90   50.49
  -4  -7   9   24.10   47.80
   4  -7  -9   -6.20    7.30
  -4  -7   9  -12.00    7.70
  -4   7   8  -25.20   30.60
  -4   7   8   13.40    3.90
   4  -7  -8   12.10    6.60
   4  -7  -8   11.50    6.20
  -4  -7   8   12.20    6.70
  -4  -7   8   12.20    6.60
  -4  -7   8  -33.60   32.90
   4  -7  -8   46.30   32.30
   4   7  -7    4.80    8.40
  -4   7   7    3.40    4.50
  -4   7   7    7.00   27.60
  -4  -7   7   22.10   30.70
  -4  -7   7    0.80    5.40
  -4  -7   7   -1.90    6.20
   4  -7  -7   -1.00   32.90
   4  -7  -7   -2.20    5.60
   4  -7  -7   -9.50    6.50
  -4   7   6    8.00    4.90
   4   7  -6    2.90    7.70
  -4   7   6  -28.20   26.70
  -4  -7   6   -5.60    2.60
   4  -7  -6    0.30    6.20
  -4  -7   6   -1.70    6.20
  -4  -7   6    3.30    5.50
   4  -7  -6   -1.20    5.80
   4  -7  -6    6.80   31.90
  -4   7   5    6.90    5.20
   4   7  -5   12.20    7.50
  -4  -7   5   -3.80    3.10
   4  -7  -5    1.00    5.50
   4  -7  -5   -4.40   33.70
   4  -7  -5    2.90    3.20
   4  -7  -5   -0.90    6.00
  -4  -7   5    2.60    5.70
  -4  -7   5    1.80    5.70
  -4   7   4    2.80    5.40
   4   7  -4    4.50    7.00
  -4  -7   4   -6.00    3.50
   4  -7  -4    0.40    2.30
   4  -7  -4   11.70   30.30
   4  -7  -4    3.20    6.00
  -4  -7   4    1.40    5.10
   4  -7  -4   -7.20    5.20
  -4  -7   4    0.30    5.20
  -4   7   3   39.40   23.80
   4   7  -3   11.70    7.00
  -4   7   3    8.20    5.70
   4  -7  -3    6.30    2.90
  -4  -7   3    6.00    5.30
  -4  -7   3    5.30    4.90
  -4  -7   3    4.00    4.00
   4  -7  -3   10.80    5.10
   4  -7  -3   -0.20    5.30
   4  -7  -3    8.50   29.60
   4   7  -2   -1.80    6.60
  -4   7   2    2.70    5.90
  -4  -7   2    0.10    4.20
  -4  -7   2   -7.20    4.30
   4  -7  -2    1.10    3.20
   4  -7  -2   -1.20    5.80
   4  -7  -2   19.60   28.40
  -4  -7   2   -3.10    5.30
   4  -7  -2   -3.00    4.60
   4   7  -1    7.40    6.40
  -4   7   1   11.40    6.20
   4  -7  -1   -0.90    5.10
   4  -7  -1    1.50    3.50
   4  -7  -1   16.10   25.30
  -4  -7   1    6.00    6.20
  -4  -7   1    4.20    4.80
   4  -7  -1    9.00    5.20
  -4  -7   1    7.90    4.20
   4   7   0   -1.60    6.00
  -4   7   0    1.70    6.40
   4   7   0   16.00   35.40
  -4  -7   0    2.90    3.90
  -4  -7   0    1.40    4.80
   4  -7   0   26.70   25.00
  -4  -7   0   -3.30    6.00
   4  -7   0   -6.00    5.60
   4  -7   0    2.80    8.20
   4  -7   0    2.40    4.10
  -4   7  -1    0.90    6.60
   4   7   1  -43.20   30.70
   4   7   1    1.00    6.00
   4  -7   1   -2.00    4.30
  -4  -7  -1   -5.30    5.20
   4  -7   1   29.50   25.20
  -4  -7  -1   -6.10    5.60
  -4  -7  -1   -3.60    3.70
   4  -7   1   -6.30    5.50
  -4  -7  -1   16.90   37.50
  -4   7  -2   65.39    8.10
   4   7   2   27.10   29.50
   4   7   2   71.29    8.90
   4  -7   2   77.99   33.90
  -4  -7  -2   67.19    6.60
  -4  -7  -2   70.49    7.30
   4  -7   2   51.59    5.80
  -4  -7  -2   62.29   35.20
   4  -7   2   69.89    6.90
  -4  -7  -2   58.59    5.50
   4   7   3   40.40    5.90
  -4   7  -3   34.80    7.70
   4   7   3   43.50   29.50
  -4  -7  -3   32.60    5.80
  -4  -7  -3   29.50    6.20
   4  -7   3   58.39   31.40
  -4  -7  -3   35.40    3.50
   4  -7   3   31.20    6.10
  -4  -7  -3   42.00   38.30
   4  -7   3   30.90    6.20
  -4   7  -4   18.10    8.10
   4   7   4   41.40   31.10
  -4   7  -4   12.20    4.90
   4   7   4   20.60    5.60
  -4  -7  -4  -46.60   36.70
   4  -7   4    8.50    5.40
   4  -7   4   10.80    5.70
   4  -7   4    5.50   29.30
  -4  -7  -4   13.70    6.60
  -4  -7  -4   10.90    6.60
   4   7   5  168.68   36.80
  -4   7  -5  116.59   12.80
   4   7   5   95.79    5.30
   4   7   5  133.29    8.90
  -4   7  -5  117.89    7.50
   4  -7   5  218.68   43.20
   4  -7   5  116.39    9.30
   4  -7   5  104.49    8.90
  -4  -7  -5  118.69    9.30
  -4  -7  -5  125.09   11.00
  -4  -7  -5   98.29   43.50
   4   7   6   51.09   35.70
   4   7   6   21.60    3.30
   4   7   6   30.60    5.00
  -4   7  -6   20.60    4.70
   4  -7   6   33.50   48.40
   4  -7   6   22.40    5.70
   4  -7   6   15.90    6.80
  -4  -7  -6   16.60    6.90
  -4  -7  -6   18.60   36.70
  -4  -7  -6   11.60    7.40
   4   7   7  161.68   39.50
   4   7   7  124.59    7.00
  -4   7  -7  115.69    7.50
   4  -7   7  111.49   10.60
  -4  -7  -7  112.19   11.60
   4  -7   7  115.69    8.90
  -4  -7  -7  151.68   43.10
  -4  -7  -7  136.99   11.40
  -4   7  -8   35.30    4.70
   4   7   8  122.99   41.10
   4  -7   8   15.80    7.30
  -4  -7  -8   17.80    6.40
  -4  -7  -8   30.50    8.40
  -4  -7  -8  -12.90   42.50
   4  -7   8   19.10    5.70
  -4   7  -9   61.89    6.40
  -4  -7  -9   49.99    8.20
   4  -7   9   43.30    8.20
   4  -7   9   58.29    6.50
  -4  -7  -9   49.20    7.80
  -4   7 -10    7.00    5.80
  -4  -7 -10    3.80    7.90
   4  -7  10    2.30    8.60
  -4  -7 -10    9.40    7.10
  -4  -7 -11   25.60    9.70
  -4  -7 -11   16.90    7.50
   4  -7  11   24.10    5.60
   4  -7  11   10.90    9.40
   4  -7  12  -13.00    9.70
  -4  -7 -12   -1.40    8.80
  -4  -7 -12    8.70    7.60
   4  -7  13   -7.80   10.30
  -4  -7 -13    0.30    9.40
  -4  -7 -13   -4.10    7.90
  -4  -7 -14   -6.60    7.40
   4  -8 -14    1.60    8.50
  -4  -8  13  -12.20   11.50
   4  -8 -13   -4.40    8.10
   4  -8 -13  -10.60   10.40
   4  -8 -12   -7.80    9.80
  -4  -8  12  -10.50   10.70
   4  -8 -12   -4.70    7.90
   4  -8 -11   -3.60    8.30
  -4  -8  11    5.80   10.10
   4  -8 -11   -4.70    7.60
   4  -8 -10   -8.00    7.40
  -4  -8  10    0.50    6.50
  -4  -8  10   -4.80    8.90
   4  -8 -10   -7.10    7.90
  -4  -8   9   -3.50    8.50
  -4  -8   9   -7.80    6.40
   4  -8  -9   -6.50    7.30
   4  -8  -9   -4.60    6.50
   4  -8  -8   -3.60    8.00
   4  -8  -8   -3.30    7.30
  -4  -8   8    0.60    6.30
  -4  -8   8   -6.00    7.70
  -4   8   7   14.30    5.30
  -4  -8   7   23.60    7.50
   4  -8  -7   20.80    8.00
   4  -8  -7   13.10    6.80
  -4  -8   7   14.00    6.70
  -4   8   6   10.20    5.70
  -4  -8   6   12.20    7.10
   4  -8  -6   -3.00    7.50
   4  -8  -6   -8.20    7.10
  -4  -8   6   64.29   38.60
  -4  -8   6   -0.90    6.20
  -4   8   5   35.40    6.40
   4  -8  -5   25.70    7.40
  -4  -8   5   37.10    7.10
   4  -8  -5   10.20    7.30
   4  -8  -5   68.49   58.89
  -4  -8   5   28.10    6.70
  -4   8   4   90.49   10.20
   4   8  -4   91.99   12.90
  -4   8   4   37.70   36.40
   4  -8  -4   71.19    4.70
   4  -8  -4  102.39   40.70
   4  -8  -4   71.79    7.90
   4  -8  -4   67.99    7.90
  -4  -8   4   64.59    6.80
  -4  -8   4   70.39    7.60
  -4  -8   4   78.99    9.00
  -4   8   3    4.60   30.70
  -4   8   3   50.39    7.50
   4   8  -3   56.49    8.60
   4  -8  -3   47.30    7.20
   4  -8  -3   45.70    5.10
   4  -8  -3   40.10    7.40
  -4  -8   3   47.80    5.90
  -4  -8   3   45.80    7.30
   4  -8  -3   95.79   34.40
  -4  -8   3   57.79    5.30
   4   8  -2  209.58   13.20
  -4   8   2  213.78   12.30
  -4  -8   2  181.08    9.50
   4  -8  -2  174.78   10.70
  -4  -8   2  198.08   12.40
   4  -8  -2  182.68   42.80
   4  -8  -2  183.78    7.70
  -4  -8   2  200.68    9.40
   4  -8  -2  196.88   10.70
   4   8  -1  127.79   11.90
  -4   8   1  147.19   11.10
   4  -8  -1  145.09    9.50
  -4  -8   1  124.09    8.60
  -4  -8   1  136.99   10.40
   4  -8  -1  176.88   38.70
   4  -8  -1  131.79    7.30
   4  -8  -1  133.39   11.10
  -4  -8   1  134.89    8.20
   4   8   0  132.19   12.30
  -4   8   0  146.39   13.00
  -4  -8   0  124.29    7.70
   4  -8   0  176.58   36.60
  -4  -8   0  146.19   11.90
  -4  -8   0  121.09    9.60
   4  -8   0  133.29    7.70
   4  -8   0  132.19    9.10
   4  -8   0  147.39   11.10
   4   8   1  177.58   13.10
  -4   8  -1  160.48   12.80
  -4  -8  -1  143.59    7.70
   4  -8   1  143.29   11.20
   4  -8   1  167.18   42.30
  -4  -8  -1  157.78   12.20
  -4  -8  -1  164.88   10.00
   4  -8   1  146.19    8.50
   4  -8   1  154.38    9.10
   4   8   2  148.59   12.10
  -4   8  -2  127.09   12.90
   4   8   2  123.89   92.59
  -4  -8  -2  120.99   10.10
  -4  -8  -2  113.19    6.60
   4  -8   2  100.79   10.50
   4  -8   2  114.99    8.70
  -4  -8  -2  113.19   10.40
   4  -8   2  121.09    8.90
   4  -8   2  125.19   42.00
   4   8   3  133.79   11.20
  -4   8  -3  112.79   13.80
   4   8   3  136.39   44.70
   4  -8   3   89.99    8.50
  -4  -8  -3  113.29   10.50
  -4  -8  -3   93.29   10.30
   4  -8   3  108.39   10.50
  -4  -8  -3   89.49    6.00
   4  -8   3  105.19   40.40
   4  -8   3  109.49    7.90
   4   8   4   40.00    6.90
   4   8   4   53.09   45.00
   4  -8   4   32.10    6.40
  -4  -8  -4   28.60    7.80
   4  -8   4   16.70   45.80
   4  -8   4   36.90    5.40
   4  -8   4   27.80    6.70
  -4  -8  -4   24.50    6.80
   4   8   5  163.88   43.10
  -4  -8  -5   88.79    8.90
  -4  -8  -5  124.89   55.49
  -4  -8  -5   62.09    8.60
   4  -8   5   66.19    7.10
   4  -8   5   62.29    7.10
   4  -8   6   10.30    7.00
  -4  -8  -6   -1.90    7.20
   4  -8   6   10.30    6.50
  -4  -8  -6    8.30    7.90
  -4  -8  -7   40.00    8.30
   4  -8   7   33.50    6.90
  -4  -8  -7   31.00    8.00
   4  -8   7   25.60    7.50
   4  -8   8   -0.10    6.50
   4  -8   8   -0.90    8.10
  -4  -8  -8    5.60    7.80
  -4  -8  -8    0.00    8.00
   4  -8   9   24.20    8.90
   4  -8   9   27.10    6.70
  -4  -8  -9   22.00    8.70
  -4  -8  -9   39.00    8.40
   4  -8  10  -10.20    8.90
  -4  -8 -10    4.60    8.70
  -4  -8 -10   11.10    7.80
   4  -8  10    0.10    6.50
   4  -8  11    5.80    9.80
  -4  -8 -11   13.60   10.60
  -4  -8 -11   18.80    8.50
  -4  -8 -12   -4.30   17.30
   4  -8  12   -3.00   10.70
  -4  -8 -12   -2.00    8.40
   4  -9 -12    0.00    9.30
  -4  -9  11   11.90   10.40
   4  -9 -11    0.60    9.10
  -4  -9  11  -21.50    7.20
   4  -9 -11   -5.00   11.60
   4  -9 -10    2.30    9.00
   4  -9 -10   -0.50    8.70
  -4  -9  10   -3.60   10.00
  -4  -9  10  -17.50    7.10
  -4  -9   9   -0.60    7.50
   4  -9  -9    0.70    8.40
  -4  -9   9    1.40    9.10
   4  -9  -9   18.00    9.70
   4  -9  -8   -1.00    9.00
   4  -9  -8    4.20    8.70
  -4  -9   8   -3.00    8.80
  -4  -9   8   -0.90    7.30
  -4  -9   7    8.30    7.50
  -4  -9   7    6.00    8.30
   4  -9  -7   -2.30    8.80
   4  -9  -7   12.70    8.60
  -4  -9   6    9.60    7.70
   4  -9  -6    7.50    8.10
  -4  -9   6    4.40    7.60
   4  -9  -6   14.80    8.40
  -4   9   5   15.50    7.00
  -4  -9   5    3.90    7.40
   4  -9  -5    1.70    7.20
   4  -9  -5   -4.30    7.90
  -4  -9   5   -4.20    7.00
  -4   9   4   24.40    7.60
   4  -9  -4    8.70    7.80
  -4  -9   4    2.00    6.20
  -4  -9   4    0.30    6.90
  -4  -9   4    0.40    5.10
   4  -9  -4    3.10    8.10
  -4   9   3    6.60    8.00
  -4  -9   3   -4.80    5.80
   4  -9  -3    3.30    7.20
   4  -9  -3   -1.30    7.80
  -4  -9   3    0.00    5.50
  -4  -9   3    2.40    7.20
  -4   9   2    8.40    8.30
  -4  -9   2   -2.90    5.40
   4  -9  -2  -11.40    7.80
   4  -9  -2    1.60    4.20
   4  -9  -2  -16.50    6.70
  -4  -9   2  -10.40    8.10
  -4  -9   2   -3.30    5.90
  -4   9   1    9.40    9.10
   4   9  -1    9.90    9.90
  -4  -9   1    0.10    7.20
   4  -9  -1  -10.50    6.90
   4  -9  -1   -3.70    4.70
   4  -9  -1   -4.80    6.80
  -4  -9   1   -4.90    6.30
  -4  -9   1   -4.40    5.30
   4   9   0    6.00    9.10
  -4   9   0   13.10    9.50
  -4  -9   0   -7.10    6.30
   4  -9   0   -2.80    6.80
   4  -9   0   -2.30    6.60
  -4  -9   0   -4.70    8.30
   4   9   1    8.80    9.20
   4  -9   1   -0.20    6.70
  -4  -9  -1  -12.10    4.60
  -4  -9  -1   -1.40    8.50
  -4  -9  -1   -0.20    6.80
   4  -9   1    0.70    6.20
   4  -9   1    7.40    5.30
   4   9   2   15.90    8.30
  -4  -9  -2   -2.40    4.30
   4  -9   2    6.80    5.80
   4  -9   2    8.80    7.80
  -4  -9  -2    8.80    8.30
  -4  -9  -2    0.50    7.40
   4  -9   2    0.70    6.30
   4   9   3   20.60    8.20
   4  -9   3   -0.20    6.10
  -4  -9  -3    6.10    7.70
  -4  -9  -3    2.10    7.80
   4  -9   3    2.20    6.20
   4  -9   3   -3.40    7.30
   4  -9   4   17.90    7.90
  -4  -9  -4   31.60    9.20
  -4  -9  -4   25.80    7.60
   4  -9   4   23.00    5.90
   4  -9   4   18.90    6.60
  -4  -9  -5    8.60    8.70
   4  -9   5    4.00    5.80
  -4  -9  -5   11.80    8.70
   4  -9   5   14.30    7.50
   4  -9   5    8.30    6.90
   4  -9   6   29.50    8.00
  -4  -9  -6   35.00    8.40
   4  -9   6   40.00    7.90
   4  -9   6   39.20    6.10
  -4  -9  -6   36.20    8.30
  -4  -9  -7    0.50    9.30
   4  -9   7   -5.20    5.20
  -4  -9  -7    3.80    8.10
   4  -9   7   -4.20    7.40
   4  -9   7    2.20    7.90
   4  -9   8   47.30    9.20
  -4  -9  -8   32.50   10.30
   4  -9   8   49.50    7.80
  -4  -9  -8   30.90    9.40
  -4  -9  -9    3.60    9.20
  -4  -9  -9   -5.30   10.40
   4  -9   9   10.60    9.50
   4  -9   9   11.30    7.50
   4  -9  10   12.10    7.90
  -4  -9 -10   15.90    9.00
   4  -9  10   22.80    9.70
  -4  -9 -10   42.60   16.80
  -4 -10   9   -5.30   10.10
  -4 -10   9    0.60    8.40
   4 -10  -8   -3.20   10.40
  -4 -10   8   -7.30    8.30
   4 -10  -8   -2.50    9.10
  -4 -10   8   -9.30    9.20
   4 -10  -7   -9.80    8.60
  -4 -10   7   -8.10    8.40
  -4 -10   7    4.50    9.10
   4 -10  -7    9.30    9.80
   4 -10  -6   -2.60    8.20
  -4 -10   6   15.80    8.80
  -4 -10   6    4.50    7.80
   4 -10  -6    4.40    9.30
  -4 -10   5    1.20    7.50
   4 -10  -5    7.10    9.20
   4 -10  -5    9.00    8.40
  -4 -10   5    4.40    9.00
  -4  10   4   25.40   10.90
  -4 -10   4    4.20    9.00
  -4 -10   4   -0.50    6.60
   4 -10  -4    3.20    9.10
   4 -10  -4    2.60    8.40
  -4  10   3   23.80    9.60
  -4 -10   3   -2.80    9.20
  -4 -10   3   -6.60    6.30
  -4 -10   3   -8.00    6.30
   4 -10  -3   -5.00    9.00
   4 -10  -3    1.80    8.10
  -4 -10   2   14.00    9.40
   4 -10  -2   -5.00    8.90
   4 -10  -2   11.00    8.30
  -4 -10   2    3.10    6.70
  -4 -10   2    3.30    6.20
  -4 -10   1   -8.10    7.10
   4 -10  -1   -4.60    7.70
   4 -10  -1   -6.40    7.80
  -4 -10   1    3.00    9.40
  -4 -10   1   -7.40    5.80
   4 -10   0   17.90    5.70
  -4 -10   0    0.80    5.70
  -4 -10   0   10.10    7.60
   4 -10   0   15.00    7.50
  -4 -10   0    8.20    8.60
   4 -10   0    8.50    8.00
   4 -10   1    5.30    7.00
  -4 -10  -1   -2.40    7.60
   4 -10   1    2.10    8.70
   4 -10   1    7.50    6.10
  -4 -10  -1   15.10    8.70
   4 -10   2   26.00    7.20
   4 -10   2   27.20    9.30
  -4 -10  -2   35.50    8.50
  -4 -10  -2   27.20    9.10
   4 -10   2   20.60    6.70
  -4 -10  -3    8.80    9.90
   4 -10   3   -6.70    7.00
   4 -10   3    9.80    6.80
  -4 -10  -3    1.40    8.60
   4 -10   3    9.30    8.70
  -4 -10  -4   22.20    9.40
   4 -10   4   16.90    8.90
   4 -10   4   18.40    6.70
  -4 -10  -4   24.90   10.00
   4 -10   4   25.40    7.70
  -4 -10  -5  -11.00    9.10
   4 -10   5   -3.10    6.30
   4 -10   5   -6.70    7.60
  -4 -10  -5   -3.90   10.00
   4 -10   5    6.20    8.60
  -4 -10  -6   18.30   10.10
   4 -10   6    8.70    8.10
   4 -10   6   17.70    8.70
  -4 -10  -6    9.00   10.20
  -4 -10  -7   -8.00    9.40
   4 -10   7  -13.80    8.50
   4 -10   7    7.30    8.80
   4 -10   8    6.70    8.70
  -4 -11   4   -0.40   10.20
  -4 -11   4  -11.70    7.40
   4 -11  -4   -5.10    9.10
  -4 -11   3   -3.50    7.20
   4 -11  -3   -1.10    8.50
  -4 -11   3   18.00   10.20
  -4 -11   2    1.60   12.20
   4 -11  -2   -3.30    8.40
  -4 -11   2    1.10    7.60
  -4 -11   1  -15.60    7.60
   4 -11  -1    7.30    8.40
  -4 -11   1   13.40   13.70
  -4 -11   0  -12.90    8.00
   4 -11   0   12.70    8.20
  -4 -11  -1   -1.50    8.70
   4 -11   1  -20.60   15.00
   4 -11   1    0.00    7.80
  -4 -11  -2  -14.50    8.90
   4 -11   2    9.30    7.20
   4 -11   2   20.10    7.50
   4 -11   2    2.60   11.80
   4 -11   3   -0.60   10.20
  -5   0  20   10.60    8.80
  -5   0  19   -0.60    8.50
  -5   0  18   78.29    9.10
   5   0 -18   75.59    7.30
   5   0 -17    7.30    6.80
   5   0 -17    4.70    5.30
  -5   0  17    9.30    7.70
   5   0 -16   76.09    7.70
   5   0 -16   77.09    7.60
   5   0 -16  111.49   40.00
  -5   0  16   22.90   26.50
  -5   0  16   69.99    8.00
  -5   0  15    6.50   20.80
  -5   0  15    9.90    6.60
   5   0 -15   31.40   28.70
   5   0 -15    0.10    5.80
   5   0 -15    7.30    4.40
  -5   0  14   32.00    7.50
   5   0 -14   25.90    5.90
   5   0 -14   28.10    4.50
  -5   0  14   38.00   18.10
   5   0 -14   36.00   23.90
   5   0 -13    4.30    1.90
  -5   0  13   -5.00    5.40
  -5   0  13   17.60   15.20
   5   0 -13   -1.40    5.00
   5   0 -13   19.60   19.20
   5   0 -13    0.40    3.80
   5   0 -12   41.80    4.20
  -5   0  12   33.10    5.50
   5   0 -12   35.30    5.40
  -5   0  12   43.20   13.90
   5   0 -12   66.29   18.10
   5   0 -12   45.80    3.20
   5   0 -11   -9.10    3.20
  -5   0  11   -0.70    4.50
   5   0 -11  -11.00   13.00
   5   0 -11   -4.00    4.40
  -5   0  11   -8.60   11.20
   5   0 -11    1.80    2.00
   5   0 -10   66.49   13.30
   5   0 -10   44.40    3.30
  -5   0  10   49.00    4.80
   5   0 -10   38.30    3.60
   5   0 -10   54.89    5.00
  -5   0  10   54.79   10.60
   5   0  -9   -3.10    2.50
   5   0  -9   -2.10    3.70
  -5   0   9   -0.80    7.50
  -5   0   9    1.40    3.40
   5   0  -9    0.40    9.60
   5   0  -8  335.97   10.60
  -5   0   8  337.57   10.10
  -5   0   8  348.27    9.10
   5   0  -8  352.46    9.50
  -5   0   8  339.67   15.20
  -5   0   7   -0.30    2.80
   5   0  -7   -1.10    3.20
  -5   0   7    1.50    5.30
  -5   0   7    0.90    6.60
  -5   0   7   -1.20    1.70
  -5   0   6  389.36   14.60
  -5   0   6  445.06   11.60
  -5   0   6  441.16   13.60
  -5   0   6  451.25   11.00
   5   0  -6  416.66   13.40
  -5   0   6  449.56   11.30
  -5   0   5    1.30    2.20
  -5   0   5   -3.10    1.50
   5   0  -5    0.70    2.60
  -5   0   5    5.80    1.90
  -5   0   4   45.20    2.60
  -5   0   4   50.39    3.20
  -5   0   4   43.40    2.70
  -5   0   3    2.50    3.30
  -5   0   3   -1.40    1.30
   5   0  -3   -2.50    4.20
  -5   0   3   -1.70    1.60
  -5   0   3   -1.50    2.10
  -5   0   3    0.60    1.60
  -5   0   2  159.78    8.60
  -5   0   2  160.38    4.50
  -5   0   2  156.18    4.70
  -5   0   2  159.78    5.40
   5   0  -2  147.29    8.60
  -5   0   2  158.88    4.60
  -5   0   1    3.10    2.00
  -5   0   1    0.70    4.80
  -5   0   1    1.30    1.30
  -5   0   1    1.00    1.60
   5   0  -1    3.50    4.80
  -5   0   0  756.22   18.50
   5   0   0  773.32   25.40
   5   0   0  750.02   18.50
  -5   0   0  724.23   25.00
  -5   0   0  751.42   18.50
  -5   0   0  755.92   18.90
  -5   0  -1   -0.40    1.40
   5   0   1    8.50    1.70
  -5   0  -1    2.40    1.50
   5   0   1   -4.80    6.60
  -5   0  -1    5.30    7.00
  -5   0  -1   -0.60    2.00
  -5   0  -2   29.90    3.30
   5   0   2   29.20    3.00
   5   0   2   40.50    9.70
  -5   0  -2   33.80    2.30
  -5   0  -2   26.40    9.60
  -5   0  -2   35.30    2.50
   5   0   3   11.70    9.00
  -5   0  -3    3.70    1.90
  -5   0  -3    0.30    1.60
   5   0   3    0.50    2.00
  -5   0  -3    5.30    9.50
  -5   0  -3   -1.30    2.70
   5   0   4  283.17   18.90
  -5   0  -4  279.27    7.40
  -5   0  -4  242.88    8.70
  -5   0  -4  290.07   19.60
   5   0   4  280.97    8.10
  -5   0  -4  276.47    7.70
   5   0   5   -3.30   10.60
  -5   0  -5    5.60   11.60
   5   0   5   -5.20    2.40
  -5   0  -5    0.50    1.70
  -5   0  -5    4.20    2.30
  -5   0  -5   -5.40    2.60
  -5   0  -6  149.29   19.70
  -5   0  -6  151.98    6.40
  -5   0  -6  159.78    5.30
  -5   0  -6  164.28    6.10
   5   0   6  188.28   19.20
   5   0   6  178.08    6.60
  -5   0  -7  -13.00   13.00
   5   0   7    4.30   12.70
  -5   0  -7    2.30    2.00
  -5   0  -7   -0.40    3.40
  -5   0  -7    2.90    3.20
   5   0   7   -4.40    3.60
  -5   0  -8   46.20    5.10
   5   0   8   69.59   18.10
  -5   0  -8   34.70    3.60
   5   0   8   37.70    4.60
  -5   0  -8   33.40    4.20
  -5   0  -8   36.40   17.50
  -5   0  -9   -4.50    2.20
  -5   0  -9   -5.60    3.90
  -5   0  -9    4.30   19.10
   5   0   9    5.10   17.90
  -5   0  -9    8.10    3.90
   5   0   9   -2.10    4.40
   5   0  10   -1.80    4.70
  -5   0 -10    8.70    4.30
  -5   0 -10   -4.40   22.00
  -5   0 -10   -2.50    4.20
  -5   0 -10    1.10    2.40
   5   0  10   45.40   21.60
   5   0  11    7.60   20.50
  -5   0 -11   -2.60    4.70
  -5   0 -11   -4.80    2.40
  -5   0 -11  -10.10   23.30
  -5   0 -12   -0.80    2.30
   5   0  12  -35.00   22.00
   5   0  12    2.80    5.50
  -5   0 -12   13.80    4.90
  -5   0 -12  -11.20   25.60
  -5   0 -12    4.20    5.10
   5   0  13   -2.40    6.20
  -5   0 -13   -4.90    2.30
  -5   0 -13    6.70    5.10
   5   0  13   16.50   28.70
  -5   0 -13   55.39   31.20
  -5   0 -13    2.30    5.30
  -5   0 -14   47.30    6.10
  -5   0 -14   56.19    6.40
   5   0  14   47.60    7.40
   5   0  15    0.10    7.30
  -5   0 -15    6.20    5.70
  -5   0 -15   -1.20    6.20
   5   0  16   16.50    7.70
  -5   0 -16   10.00    6.90
  -5   0 -16   13.40    6.30
   5   0  17   15.30    8.20
  -5   0 -17   -1.90    6.80
   5   0  18   44.80    9.10
  -5   0 -18   35.40    7.40
  -5   1  20   14.80   12.70
  -5  -1  20    0.30    9.70
  -5   1  19   10.60    7.30
   5  -1 -19    7.10    7.00
  -5  -1  19    9.00    9.60
  -5   1  18   34.10    7.30
   5   1 -18   45.40    9.20
   5  -1 -18   30.30    6.80
  -5  -1  18   45.80    9.50
   5   1 -17    7.40    7.60
  -5   1  17    7.60    6.50
   5  -1 -17   -2.60    6.10
  -5  -1  17   -8.20    8.50
   5   1 -16  114.59    6.70
  -5   1  16  127.89    9.60
   5   1 -16  132.49   12.70
   5  -1 -16  139.59    9.70
   5  -1 -16  126.69    9.50
   5  -1 -16  101.89   41.30
  -5  -1  16  124.19   11.50
   5   1 -15    0.00    3.60
   5   1 -15    5.30    6.60
  -5   1  15    3.40    6.50
  -5   1  15   -2.50   21.50
   5  -1 -15    3.70    5.30
   5  -1 -15    5.80   11.00
  -5  -1  15    6.20    7.40
  -5  -1  15   50.89   20.80
   5  -1 -15    2.10   27.80
  -5   1  14  107.19    8.10
   5   1 -14   95.49    5.60
  -5   1  14   46.90   19.20
   5   1 -14  102.59   10.30
   5  -1 -14  104.49    8.40
   5  -1 -14   81.79    7.50
   5  -1 -14  122.29   25.70
  -5  -1  14   88.39    9.80
   5  -1 -14   87.29    4.80
  -5  -1  14   79.89   19.70
  -5   1  13  -25.50   15.10
  -5   1  13    5.60    4.80
   5   1 -13   -1.20    5.80
   5   1 -13   -1.90    3.00
  -5  -1  13   10.90   15.90
   5  -1 -13    1.10    4.60
   5  -1 -13    0.30    4.40
   5  -1 -13  -10.30   17.80
  -5  -1  13   -4.20    6.10
   5  -1 -13    3.00    2.50
   5   1 -12   14.00    5.70
   5   1 -12   24.50    3.00
  -5   1  12    2.30   13.30
  -5   1  12   13.80    4.40
   5  -1 -12   26.60    2.70
   5  -1 -12    2.30   15.30
   5  -1 -12   19.40    4.50
  -5  -1  12   10.10    5.60
   5  -1 -12   20.60    4.30
  -5  -1  12    9.40   13.90
  -5   1  11   12.30   11.70
   5   1 -11   33.00    3.00
   5   1 -11   30.10    5.20
  -5   1  11   35.30    4.20
  -5  -1  11   40.70   12.50
   5  -1 -11   25.40   13.60
   5  -1 -11   27.00    4.30
   5  -1 -11   30.00    4.10
   5  -1 -11   34.10    2.80
  -5  -1  11   21.80    5.50
  -5   1  10  194.48    7.40
   5   1 -10  186.38    9.50
  -5   1  10  158.48   16.10
   5   1 -10  202.18    6.30
  -5  -1  10  202.68    8.70
  -5  -1  10  208.28    5.70
  -5  -1  10  171.18   16.90
   5  -1 -10  194.48    8.10
   5  -1 -10  193.18    6.40
   5  -1 -10  199.98   17.70
   5  -1 -10  194.88    7.30
   5   1  -9   -2.70    4.20
  -5   1   9    2.40    3.10
   5   1  -9    3.60    2.10
  -5   1   9    0.10    7.90
   5  -1  -9    4.30    2.20
  -5  -1   9    1.20    4.20
  -5  -1   9    2.70    1.70
   5  -1  -9    3.60    3.00
  -5  -1   9  -13.00    9.00
   5  -1  -9    1.40    8.60
   5  -1  -9    1.40    3.60
   5   1  -8  276.77    7.50
  -5   1   8  274.27    8.10
  -5   1   8  242.68   13.70
   5   1  -8  265.77    9.80
   5  -1  -8  265.07   13.80
  -5  -1   8  269.47    7.20
   5  -1  -8  274.87    8.20
  -5  -1   8  274.87    9.10
  -5  -1   8  280.77   15.80
   5   1  -7   26.10    4.00
  -5   1   7   25.60    6.20
  -5   1   7   28.30    2.80
  -5  -1   7   25.90    3.70
  -5  -1   7   29.80    2.70
   5  -1  -7   27.80    3.30
  -5  -1   7   34.30   10.50
  -5  -1   7   34.40    8.00
   5  -1  -7   32.80    5.50
  -5   1   6  727.93   18.30
  -5   1   6  733.23   18.50
  -5   1   6  744.13   18.20
   5   1  -6  724.43   19.50
  -5  -1   6  736.93   18.00
  -5  -1   6  756.42   18.00
  -5  -1   6  739.53   18.80
   5  -1  -6  743.03   18.80
  -5  -1   6  727.73   24.50
  -5  -1   6  691.23   26.30
  -5   1   5  163.98    5.00
  -5   1   5  161.68    5.00
   5   1  -5  164.68    6.60
  -5   1   5  146.39    5.10
  -5   1   5  160.88    5.90
  -5  -1   5  134.99   12.70
  -5  -1   5  161.58   11.60
  -5  -1   5  160.38    5.90
  -5  -1   5  164.88    4.70
  -5  -1   5  160.18    4.80
   5   1  -4 3097.69   79.39
  -5   1   4 3284.97   78.79
  -5   1   4 3259.27   78.69
   5   1  -4 3342.47   85.59
  -5   1   4 3306.97   78.69
  -5   1   4 3206.48   78.99
  -5  -1   4 3400.26   78.49
  -5  -1   4 3460.85   86.29
  -5  -1   4 3225.08   78.59
  -5  -1   4 3261.37   78.99
  -5   1   3   65.49    3.80
  -5   1   3   72.49    3.00
  -5   1   3   66.09    2.90
  -5   1   3   65.59    3.10
   5   1  -3   80.69   10.40
   5   1  -3   65.79    5.80
  -5  -1   3   68.09    8.80
  -5  -1   3   65.89    3.70
  -5  -1   3   71.09    3.00
  -5  -1   3   69.99    2.70
   5  -1  -3   63.09    6.20
   5  -1  -3   74.69    5.30
  -5   1   2 2861.01   69.19
  -5   1   2 2588.54   65.19
  -5   1   2 2652.03   64.89
   5   1  -2 2807.82   73.39
  -5   1   2 2680.33   64.99
  -5  -1   2 2678.53   65.09
   5  -1  -2 2660.93   64.89
  -5  -1   2 2787.82   71.99
  -5  -1   2 2625.24   64.89
  -5  -1   2 2742.63   64.79
   5  -1  -2 2703.93   68.69
   5   1  -1  201.68   13.20
  -5   1   1  208.28    5.70
  -5   1   1  211.08    5.90
  -5   1   1  217.78   11.30
  -5   1   1  198.28    6.20
   5  -1  -1  204.38    5.80
  -5  -1   1  213.08    6.00
  -5  -1   1  203.58    5.80
  -5  -1   1  185.78   12.50
  -5  -1   1  200.18    6.40
  -5  -1   1  205.18    5.70
   5  -1  -1  198.78   10.80
   5   1   0 3099.09   80.39
  -5   1   0 2945.71   71.29
  -5   1   0 2972.80   71.29
  -5   1   0 3077.39   78.49
  -5   1   0 2894.01   71.59
   5  -1   0 2909.21   71.29
  -5  -1   0 3167.38   80.39
   5  -1   0 3031.40   78.29
  -5  -1   0 2841.92   71.29
  -5  -1   0 2924.71   71.29
  -5  -1   0 2913.11   71.29
  -5  -1   0 2919.51   71.59
  -5   1  -1 1440.16   43.20
  -5   1  -1 1421.06   34.80
   5   1   1 1485.55   34.90
  -5   1  -1 1351.06   35.70
  -5   1  -1 1455.15   34.80
   5   1   1 1472.15   44.60
   5  -1   1 1421.76   34.90
  -5  -1  -1 1434.86   35.10
  -5  -1  -1 1414.96   34.80
   5  -1   1 1476.45   43.50
  -5  -1  -1 1428.66   34.90
  -5  -1  -1 1469.85   44.50
   5   1   2 3021.70   72.89
   5   1   2 3170.28   84.29
  -5   1  -2 3001.50   72.89
  -5   1  -2 2796.12   73.49
  -5   1  -2 3257.17   83.89
  -5   1  -2 2993.50   72.79
  -5  -1  -2 2872.01   72.79
   5  -1   2 3108.99   83.29
  -5  -1  -2 3091.59   72.99
  -5  -1  -2 2973.30   73.09
  -5  -1  -2 3121.89   83.99
   5  -1   2 3070.09   72.99
   5   1   3  329.17    9.00
   5   1   3  362.96   20.30
  -5   1  -3  308.37   19.30
  -5   1  -3  333.37    8.80
  -5   1  -3  326.97    8.70
   5  -1   3  329.17   20.10
  -5  -1  -3  334.67    9.10
   5  -1   3  332.07    9.10
  -5  -1  -3  333.27    9.10
  -5  -1  -3  311.87   19.80
  -5  -1  -3  326.07    8.80
  -5   1  -4 1518.95   49.99
  -5   1  -4 1453.25   36.50
  -5   1  -4 1522.55   36.40
  -5   1  -4 1531.45   37.30
   5   1   4 1533.35   50.19
   5   1   4 1530.55   36.70
   5  -1   4 1513.95   36.90
   5  -1   4 1517.55   49.40
  -5  -1  -4 1457.45   36.50
  -5  -1  -4 1489.85   36.80
  -5  -1  -4 1490.55   36.80
  -5  -1  -4 1510.45   50.49
  -5   1  -5  255.37    7.30
   5   1   5  283.27   20.80
  -5   1  -5  255.87    8.60
  -5   1  -5  259.57    7.00
   5   1   5  252.27    7.80
  -5   1  -5  224.08   20.60
  -5  -1  -5  257.17    7.80
   5  -1   5  245.18    8.20
  -5  -1  -5  229.68    8.40
   5  -1   5  275.07   22.10
  -5  -1  -5  257.37    7.20
  -5  -1  -5  253.87   21.00
   5   1   6  650.83   17.00
  -5   1  -6  673.03   16.40
  -5   1  -6  681.43   17.80
  -5   1  -6  676.93   33.20
   5   1   6  637.64   32.00
  -5   1  -6  664.53   16.80
  -5  -1  -6  664.13   16.50
  -5  -1  -6  606.44   17.30
   5  -1   6  676.93   32.00
   5  -1   6  654.03   17.20
  -5  -1  -6  614.24   32.30
  -5  -1  -6  659.53   17.10
  -5   1  -7   97.09    4.20
   5   1   7   84.69    5.60
  -5   1  -7   98.69    7.20
  -5   1  -7  107.29   21.50
  -5   1  -7   93.69    4.50
   5   1   7  134.19   20.30
   5  -1   7  113.89   19.60
  -5  -1  -7   99.29    5.20
  -5  -1  -7  101.89    4.30
   5  -1   7   93.99    6.50
  -5  -1  -7  100.19    6.10
  -5  -1  -7  107.29   20.20
   5   1   8  273.27    9.40
  -5   1  -8  275.97   10.00
  -5   1  -8  255.37   30.40
  -5   1  -8  265.17    7.60
   5   1   8  286.77   28.30
  -5   1  -8  273.87    8.50
  -5  -1  -8  263.47   26.80
  -5  -1  -8  271.37    9.50
  -5  -1  -8  262.17    8.70
  -5  -1  -8  276.17    8.10
   5  -1   8  285.97   25.10
   5  -1   8  267.17    9.80
   5   1   9    0.20    4.10
   5   1   9  -11.90   16.70
  -5   1  -9    9.00    3.10
  -5   1  -9  -11.30   20.10
  -5   1  -9    4.60    4.80
  -5   1  -9    7.80    2.20
  -5  -1  -9   14.80   18.10
   5  -1   9   -6.10   16.10
  -5  -1  -9    7.60    2.50
  -5  -1  -9    6.90    3.40
   5  -1   9    1.50    4.70
  -5  -1  -9   12.50    4.10
   5   1  10   42.90    5.00
  -5   1 -10   39.70    3.70
  -5   1 -10   40.20    5.50
  -5   1 -10   40.70    4.30
  -5   1 -10   34.70   22.60
   5   1  10   11.10   20.00
   5  -1  10   22.70   21.00
  -5  -1 -10   11.60   20.80
  -5  -1 -10   44.90    5.70
  -5  -1 -10   47.10    4.30
   5   1  11   26.50    5.30
  -5   1 -11   26.80    2.50
  -5   1 -11   56.59   25.80
  -5   1 -11   27.80    4.40
  -5   1 -11   29.20    6.00
   5   1  11   26.70   21.30
  -5  -1 -11   34.20    4.30
  -5  -1 -11   36.40    5.40
  -5  -1 -11   37.40   26.30
  -5  -1 -11   29.70    3.00
   5  -1  11   88.99   22.90
   5  -1  11   23.30    6.20
  -5   1 -12   11.80    5.10
  -5   1 -12   15.90    6.00
   5   1  12   55.29   24.20
  -5   1 -12  -25.40   30.80
  -5   1 -12   12.80    2.30
  -5  -1 -12   16.40    5.10
  -5  -1 -12    4.00   24.90
  -5  -1 -12    4.20    2.80
   5  -1  12   14.30    6.40
  -5  -1 -12   11.80    4.30
   5  -1  12   -6.40   23.00
   5   1  13   14.30   29.40
  -5   1 -13  -48.50   29.90
   5   1  13    1.80    6.00
  -5   1 -13    7.90    6.20
  -5   1 -13    6.40    4.80
   5  -1  13   32.30   29.80
   5  -1  13   -2.10    6.50
  -5  -1 -13    0.40    5.80
  -5  -1 -13    6.70    4.60
  -5  -1 -13   -3.60    2.80
  -5  -1 -13    7.50   32.30
  -5   1 -14    1.50    5.00
  -5   1 -14    4.10    6.60
   5   1  14    1.50    6.40
   5  -1  14    5.20    7.00
  -5  -1 -14    8.50    5.00
  -5  -1 -14   -2.40    6.30
   5   1  15   20.20    7.00
  -5   1 -15   15.00    7.40
  -5   1 -15   20.10    5.60
   5  -1  15   15.70    7.90
  -5  -1 -15   15.00    6.80
  -5  -1 -15   10.70    5.40
   5   1  16   -1.10    7.20
  -5   1 -16    0.30    5.80
  -5   1 -16   -1.10    7.70
   5  -1  16   -2.40    8.40
  -5  -1 -16    3.60    7.20
  -5   1 -17   17.90   12.60
   5   1  17    6.90    7.70
  -5   1 -17    2.30    6.30
   5  -1  17   12.90    8.90
  -5  -1 -17   -0.80    7.30
   5   1  18    9.40    8.20
  -5   1 -18   -3.40    6.30
  -5  -1 -18   -5.90    7.70
   5  -1  18   -1.80    9.30
   5  -2 -19   11.90    8.00
  -5  -2  19  -13.70   10.40
  -5   2  18   29.50    7.30
   5  -2 -18   33.50    7.40
  -5  -2  18   12.90   10.00
   5   2 -17   21.60    9.40
  -5  -2  17   24.80    9.30
   5  -2 -17   24.80    7.00
  -5   2  16   26.30    5.30
   5   2 -16   28.50    8.60
   5  -2 -16   23.50    6.90
  -5  -2  16   17.50    8.30
  -5   2  15   12.30    4.70
   5   2 -15   11.20    7.50
   5  -2 -15    9.90    6.30
   5  -2 -15   16.60    3.50
  -5  -2  15    8.70    8.00
  -5  -2  15   36.80   23.60
   5  -2 -15   15.60    4.90
  -5   2  14   13.40    4.50
   5   2 -14    9.40    2.30
   5   2 -14   15.00    7.30
  -5   2  14   28.70   21.20
   5  -2 -14   11.80   22.30
   5  -2 -14   14.00    5.80
   5  -2 -14   17.80    5.10
  -5  -2  14   49.50   20.30
  -5  -2  14   10.30    7.10
   5  -2 -14   17.70    3.40
  -5   2  13  -11.60   18.40
  -5   2  13   -0.30    3.90
   5   2 -13   -3.80    6.20
   5   2 -13   -3.80    2.00
   5  -2 -13    3.10    3.20
  -5  -2  13  -12.20    6.60
   5  -2 -13   22.30   17.80
  -5  -2  13  -23.80   16.80
   5   2 -12   17.50    2.00
  -5   2  12   26.90    3.80
  -5   2  12   12.40   15.50
   5   2 -12    9.80    6.30
   5  -2 -12   25.00   15.30
   5  -2 -12   25.00    3.30
  -5  -2  12   16.40    6.40
  -5  -2  12   27.80   15.40
   5  -2 -12   20.50    4.90
  -5   2  11   13.10    3.20
   5   2 -11    9.90    5.80
  -5   2  11    7.40   14.00
   5   2 -11    8.70    1.70
  -5  -2  11   -9.10   13.20
   5  -2 -11   12.00    3.00
  -5  -2  11    6.90    1.80
   5  -2 -11    9.60    4.60
   5  -2 -11    6.80    3.80
   5  -2 -11   19.50   12.70
   5   2 -10   15.80    2.60
  -5   2  10   20.00   12.60
   5   2 -10   13.60    5.20
  -5   2  10   16.30    3.00
  -5  -2  10   14.40   12.40
   5  -2 -10   21.60   10.80
   5  -2 -10   10.10    3.50
   5  -2 -10   16.70    3.10
  -5  -2  10   10.50    1.90
  -5  -2  10   13.90    5.40
   5  -2 -10   12.50    4.20
   5   2  -9   33.00    5.30
  -5   2   9   36.40    3.80
  -5   2   9   53.49   12.30
  -5  -2   9   57.29   12.90
  -5  -2   9   33.70    5.20
   5  -2  -9   36.40    4.00
   5  -2  -9   31.10    4.10
   5  -2  -9   36.90    3.80
   5  -2  -9   43.50    9.90
  -5  -2   9   32.40    2.90
   5   2  -8    7.50    4.50
  -5   2   8   10.60    2.30
  -5   2   8   12.40    9.60
   5  -2  -8    3.90    3.40
   5  -2  -8   12.20    2.60
  -5  -2   8    8.50    3.90
  -5  -2   8    5.30    1.80
  -5  -2   8   14.40   10.40
   5  -2  -8    9.80    7.90
   5  -2  -8    6.00    3.10
   5   2  -7  190.68    8.60
  -5   2   7  208.08   14.50
  -5   2   7  202.48    6.00
  -5  -2   7  207.38    6.00
   5  -2  -7  198.98   12.30
  -5  -2   7  221.98   17.20
  -5  -2   7  199.08    7.40
   5  -2  -7  206.08    6.50
   5   2  -6  134.39    7.10
  -5   2   6  131.59   11.30
  -5   2   6  124.49    5.50
  -5   2   6  137.29    4.50
  -5   2   6  126.59    5.80
  -5  -2   6  132.99    6.20
   5  -2  -6  139.59    5.00
   5  -2  -6  126.99   10.00
  -5  -2   6  127.79   15.50
  -5  -2   6  132.19    4.50
  -5  -2   6  147.39   18.00
   5   2  -5  623.44   16.60
  -5   2   5  587.74   15.50
  -5   2   5  599.64   20.40
  -5   2   5  605.74   15.50
   5   2  -5  603.74   26.20
  -5   2   5  596.14   14.90
  -5  -2   5  546.55   26.90
  -5  -2   5  590.74   15.00
  -5  -2   5  613.54   14.70
   5  -2  -5  617.04   20.60
  -5  -2   5  622.64   15.90
  -5   2   4    9.50    2.40
  -5   2   4   -1.10    2.40
   5   2  -4    2.20    2.90
   5   2  -4   -1.90    8.40
  -5  -2   4    3.80    1.40
  -5  -2   4    3.40    2.80
   5  -2  -4    4.70    1.70
  -5  -2   4   -8.20    9.40
  -5  -2   4    4.70    1.90
   5  -2  -4    4.40    5.50
   5  -2  -4   -0.70    6.80
   5   2  -3  364.76   10.80
   5   2  -3  376.16   20.90
  -5   2   3  370.46   10.20
  -5   2   3  367.46    9.70
  -5   2   3  370.06    9.90
   5  -2  -3  363.56   15.30
   5  -2  -3  370.66    9.50
  -5  -2   3  364.26    9.70
  -5  -2   3  383.36    9.30
  -5  -2   3  348.67   21.20
  -5  -2   3  352.06   10.00
   5  -2  -3  364.46   17.20
  -5   2   2  113.19    4.80
   5   2  -2  118.19    5.30
   5   2  -2   87.69   14.30
  -5   2   2  111.99    4.50
  -5   2   2  109.79    4.40
   5  -2  -2  103.39   10.00
   5  -2  -2  120.99    4.00
  -5  -2   2  101.69   13.90
  -5  -2   2  116.69    3.70
   5  -2  -2  101.69   11.20
  -5  -2   2  113.19    4.30
  -5  -2   2  110.99    4.30
  -5   2   1    8.10    7.10
  -5   2   1   10.20    4.20
  -5   2   1   11.80    2.10
  -5   2   1    8.50    2.10
   5   2  -1   19.80   10.20
   5  -2  -1   10.10    1.90
  -5  -2   1   12.60    1.80
  -5  -2   1   13.60    2.30
   5  -2  -1   17.30    7.30
  -5  -2   1   12.60    2.10
  -5  -2   1   -1.90    9.10
  -5   2   0  225.88    7.60
  -5   2   0  236.98   15.20
  -5   2   0  226.58    6.50
   5   2   0  215.38    7.20
   5   2   0  243.98   18.20
  -5   2   0  228.48    6.70
  -5  -2   0  242.88    6.70
  -5  -2   0  227.58    6.80
  -5  -2   0  231.48    6.70
  -5  -2   0  213.88   17.90
   5  -2   0  235.58   14.80
   5  -2   0  231.58    6.70
  -5   2  -1  110.79    4.10
  -5   2  -1  109.09    4.20
   5   2   1  104.79   15.50
  -5   2  -1  106.19    5.50
  -5   2  -1  104.69   13.90
  -5  -2  -1  118.19   15.60
   5  -2   1  110.39   11.80
  -5  -2  -1  113.19    4.60
  -5  -2  -1  122.39    4.60
  -5  -2  -1  112.19    4.40
   5  -2   1  112.19    4.50
   5   2   2   73.89    3.70
  -5   2  -2   74.49    3.70
  -5   2  -2   87.49   13.50
   5   2   2   81.79   13.20
  -5   2  -2   75.89    5.30
  -5   2  -2   76.09    3.80
   5  -2   2   74.79    4.20
  -5  -2  -2   91.49   14.90
  -5  -2  -2   79.69    4.30
  -5  -2  -2   80.09    4.20
   5  -2   2   77.09   12.40
  -5  -2  -2   74.39    4.10
   5   2   3   21.60    2.40
  -5   2  -3   32.40   11.70
  -5   2  -3   17.90    3.70
  -5   2  -3   14.70    2.10
  -5   2  -3   15.30    2.50
   5   2   3   31.40   11.10
   5  -2   3   18.90    3.00
   5  -2   3   31.50   11.60
  -5  -2  -3   21.30   12.80
  -5  -2  -3   16.40    2.60
  -5  -2  -3   18.10    2.80
   5   2   4  166.28   18.20
  -5   2  -4  172.38    5.70
  -5   2  -4  182.78    7.70
  -5   2  -4  173.58   21.00
   5   2   4  170.38    5.80
  -5   2  -4  179.28    5.90
   5  -2   4  173.88    6.80
  -5  -2  -4  177.08    5.80
  -5  -2  -4  180.58    6.40
  -5  -2  -4  199.28   20.30
  -5  -2  -4  178.68    6.20
   5  -2   4  185.68   17.60
  -5   2  -5  705.73   35.40
  -5   2  -5  735.13   18.20
   5   2   5  691.53   33.10
  -5   2  -5  734.53   18.00
  -5   2  -5  736.03   19.70
   5   2   5  723.03   18.40
   5  -2   5  743.53   34.60
  -5  -2  -5  724.43   18.40
  -5  -2  -5  741.63   18.40
  -5  -2  -5  685.33   34.00
  -5  -2  -5  707.63   18.80
   5  -2   5  741.53   19.00
  -5   2  -6   13.50    2.70
  -5   2  -6   15.90    4.60
   5   2   6   18.80    3.10
  -5   2  -6   25.50   15.60
  -5   2  -6   10.40    2.20
   5   2   6   44.90   15.00
   5  -2   6   16.90   13.50
   5  -2   6   10.50    4.10
  -5  -2  -6   17.60    3.60
  -5  -2  -6   -0.30   14.40
  -5  -2  -6   20.50    2.80
  -5  -2  -6   15.90    2.80
  -5   2  -7  102.89   20.90
   5   2   7  137.69    6.20
  -5   2  -7  138.29    5.60
  -5   2  -7  136.69    5.10
  -5   2  -7  124.79    8.20
   5   2   7  156.08   21.50
   5  -2   7  140.09    6.90
  -5  -2  -7  131.79    6.70
  -5  -2  -7  151.88   23.70
  -5  -2  -7  136.19    5.60
  -5  -2  -7  145.89    6.00
   5  -2   7  174.68   24.50
   5   2   8    7.30   17.50
  -5   2  -8   -8.80   18.30
  -5   2  -8   -4.80    5.00
  -5   2  -8    0.50    2.20
   5   2   8   -3.00    3.50
  -5   2  -8    7.90    3.10
  -5  -2  -8   -0.90    4.20
   5  -2   8   -4.60    4.20
  -5  -2  -8    4.80    2.90
   5  -2   8    7.40   17.90
  -5  -2  -8   17.30   19.90
   5   2   9   56.69    6.10
  -5   2  -9   62.09    5.40
  -5   2  -9   84.49   26.00
  -5   2  -9   59.39    4.10
  -5   2  -9   61.09    6.40
   5   2   9   67.59   18.50
  -5  -2  -9   48.10    6.50
   5  -2   9   65.49   19.10
   5  -2   9   41.70    6.80
  -5  -2  -9   47.90   21.80
  -5  -2  -9   63.39    5.10
   5   2  10   99.09   21.40
  -5   2 -10   57.39    6.90
  -5   2 -10   54.39    5.30
  -5   2 -10   56.59   25.00
   5   2  10   50.79    5.00
  -5  -2 -10   58.29    5.20
  -5  -2 -10   53.49    5.40
  -5  -2 -10   60.99    6.30
  -5  -2 -10   73.19   24.10
   5  -2  10   48.60    6.40
   5  -2  10   98.99   21.40
   5   2  11    4.90    4.60
  -5   2 -11    9.30    3.90
  -5   2 -11   -4.20   26.40
   5   2  11  -24.40   20.60
  -5   2 -11    4.10    6.10
   5  -2  11    1.90   22.00
  -5  -2 -11    8.10    3.60
  -5  -2 -11    9.20    6.00
  -5  -2 -11  -18.60   25.30
  -5  -2 -11    7.60    3.30
   5  -2  11    4.00    6.10
  -5   2 -12   22.10    4.40
  -5   2 -12   76.39   31.10
  -5   2 -12   20.90    6.90
   5   2  12   18.70    5.20
   5   2  12   56.49   27.40
  -5  -2 -12   19.30    4.00
   5  -2  12    8.40    6.80
   5  -2  12   17.70    2.30
  -5  -2 -12   50.79   29.90
  -5  -2 -12   14.00    3.50
  -5  -2 -12   13.00    6.30
   5  -2  12  -32.20   26.30
   5   2  13   -1.30    6.60
   5   2  13   43.90   28.10
  -5   2 -13   -6.80   33.40
  -5   2 -13   -6.70    7.10
  -5   2 -13    9.20    4.70
  -5  -2 -13    2.70    4.10
  -5  -2 -13   13.00    6.20
   5  -2  13   52.69   32.40
   5  -2  13    3.90    7.50
  -5  -2 -13   -2.60    3.40
  -5  -2 -13   23.20   30.50
   5   2  14   25.60    6.10
  -5   2 -14   17.70    8.00
  -5   2 -14    9.80    4.80
  -5  -2 -14   11.60    3.50
  -5  -2 -14   24.90    7.50
   5  -2  14   23.70    7.90
  -5  -2 -14   17.40    5.80
  -5   2 -15    6.00    9.60
  -5   2 -15    3.00    5.30
   5   2  15    4.40    6.30
   5  -2  15   -6.40    8.20
  -5  -2 -15    1.30    7.40
  -5   2 -16    7.00    5.80
   5   2  16    8.20    6.60
   5  -2  16   -3.20    9.10
  -5  -2 -16    6.50    8.20
  -5   2 -17   -1.10    6.00
   5   2  17   10.90    7.10
   5  -2  17   -4.90    9.20
  -5  -2 -17    2.70    8.20
  -5  -2 -18    4.60    8.80
   5  -2  18   17.80   10.20
  -5  -3  19   14.20   11.50
   5  -3 -19   20.50    9.00
  -5  -3  18   -4.10   10.00
   5  -3 -18   -1.20    8.30
   5  -3 -17   13.40    7.80
  -5  -3  17  -10.80    9.20
   5  -3 -16   27.90    7.80
  -5  -3  16   20.20    9.10
  -5   3  15   15.10    3.80
   5   3 -15   10.50    8.60
   5  -3 -15   19.80    4.40
  -5  -3  15    2.60    8.80
   5  -3 -15   19.60    6.90
   5  -3 -15    6.40   38.80
  -5   3  14   69.89    5.50
   5   3 -14   88.89    9.50
  -5   3  14   73.59   28.60
   5  -3 -14   95.59    9.70
  -5  -3  14   68.19    8.10
   5  -3 -14   94.09    6.90
  -5  -3  14   69.59   24.10
   5  -3 -14   56.79   25.20
  -5   3  13   69.29   21.90
   5   3 -13   19.10    7.60
  -5   3  13   15.80    3.20
  -5  -3  13    5.20    7.50
   5  -3 -13   18.20    3.00
   5  -3 -13   19.00   19.30
  -5  -3  13   14.40   19.50
   5  -3 -13   19.20    4.00
   5  -3 -13   13.30    6.10
  -5   3  12  192.08    6.60
  -5   3  12  188.18   29.30
   5   3 -12  194.58   12.10
   5  -3 -12  202.88    9.90
  -5  -3  12  171.18   25.10
   5  -3 -12  195.78    7.00
  -5  -3  12  194.58    6.00
  -5  -3  12  200.78   11.50
   5  -3 -12  204.18   24.50
   5  -3 -12  193.98    8.00
  -5   3  11   37.90   17.70
  -5   3  11   44.50    3.90
   5   3 -11   32.80    7.00
  -5  -3  11   31.90    2.30
  -5  -3  11   53.99   18.00
   5  -3 -11   35.60    4.00
   5  -3 -11   36.00    3.40
   5  -3 -11   32.90    5.70
   5  -3 -11   17.10   14.80
  -5  -3  11   33.40    6.60
  -5   3  10  221.98   23.90
  -5   3  10  239.78    7.00
   5   3 -10  248.78   11.90
  -5  -3  10  241.08    6.90
   5  -3 -10  246.08    8.60
  -5  -3  10  249.78   25.00
   5  -3 -10  232.98    9.00
   5  -3 -10  242.78    8.00
   5  -3 -10  237.68   21.10
  -5  -3  10  231.28   10.90
  -5   3   9   46.50   14.80
  -5   3   9   60.09    3.40
   5   3  -9   44.60    5.90
  -5  -3   9   55.09   16.00
  -5  -3   9   40.90    5.30
   5  -3  -9   55.89    5.10
   5  -3  -9   47.00    5.30
   5  -3  -9   56.89   13.00
  -5  -3   9   49.60    3.70
   5  -3  -9   47.90    4.00
   5   3  -8  441.16   14.50
  -5   3   8  422.16   24.60
   5  -3  -8  427.96   12.60
  -5  -3   8  442.86   11.50
  -5  -3   8  447.36   13.60
   5  -3  -8  433.86   22.10
   5  -3  -8  461.55   12.40
  -5  -3   8  431.86   27.10
  -5   3   7  107.39    5.30
   5   3  -7   98.99    8.00
  -5   3   7   88.09   13.90
   5  -3  -7   85.99   14.10
  -5  -3   7   96.09    6.30
  -5  -3   7  109.99    4.50
  -5  -3   7   94.89   17.20
   5  -3  -7  103.49    5.50
   5  -3  -7  110.69    6.20
  -5   3   6  139.19    5.70
   5   3  -6  142.29    8.20
  -5   3   6  155.48   16.10
   5  -3  -6  143.19    4.50
  -5  -3   6  136.99    6.40
   5  -3  -6  137.89    5.90
   5  -3  -6  127.49   15.40
  -5  -3   6  143.99    5.10
  -5   3   5  502.05   13.70
  -5   3   5  489.65   22.70
   5   3  -5  486.45   28.60
  -5   3   5  520.35   13.50
   5   3  -5  505.25   15.00
   5  -3  -5  515.95   13.60
   5  -3  -5  517.45   12.80
  -5  -3   5  521.95   13.30
  -5  -3   5  523.15   14.20
   5  -3  -5  487.15   24.30
  -5  -3   5  504.45   30.40
   5   3  -4  557.34   15.80
  -5   3   4  566.44   14.70
  -5   3   4  559.04   14.70
   5   3  -4  585.84   30.50
  -5  -3   4  575.84   13.80
   5  -3  -4  551.14   14.50
  -5  -3   4  570.64   14.50
  -5  -3   4  551.04   15.00
   5  -3  -4  533.15   26.40
   5  -3  -4  567.84   14.00
  -5  -3   4  512.05   30.80
   5   3  -3  591.14   16.40
  -5   3   3  592.14   15.60
   5   3  -3  595.84   31.50
   5  -3  -3  611.14   14.90
   5  -3  -3  595.64   15.30
   5  -3  -3  594.44   27.00
  -5  -3   3  589.94   32.20
  -5  -3   3  600.94   14.80
  -5  -3   3  620.64   15.70
  -5  -3   3  584.34   15.30
   5  -3  -3  576.74   24.40
  -5   3   2    4.40    2.60
  -5   3   2    4.10    3.00
   5   3  -2    9.20    3.40
   5   3  -2   -1.90   11.00
  -5  -3   2    3.20    2.50
   5  -3  -2    1.30    2.00
   5  -3  -2    3.60    2.20
  -5  -3   2    6.30    1.90
  -5  -3   2    3.00    2.40
   5  -3  -2    7.50    9.70
   5  -3  -2    2.90    8.60
  -5  -3   2    0.00   12.10
   5   3  -1 1694.83   57.79
  -5   3   1 1745.73   42.10
   5   3  -1 1664.63   42.10
  -5   3   1 1719.93   41.60
  -5  -3   1 1717.93   41.40
  -5  -3   1 1697.43   58.79
   5  -3  -1 1677.73   52.59
  -5  -3   1 1654.73   41.70
   5  -3  -1 1751.62   53.99
   5  -3  -1 1732.13   41.40
  -5  -3   1 1731.93   41.60
  -5   3   0   53.69    4.10
   5   3   0   50.19   13.60
   5   3   0   59.29    4.70
  -5   3   0   62.49    5.40
  -5  -3   0   55.29   15.20
   5  -3   0   51.49   12.30
  -5  -3   0   62.79    3.90
  -5  -3   0   41.40    3.80
   5  -3   0   57.69    3.70
  -5  -3   0   56.59    4.00
  -5   3  -1 2663.23   64.09
   5   3   1 2468.95   63.79
   5   3   1 2656.83   80.59
  -5   3  -1 2665.53   63.39
  -5   3  -1 2628.74   76.99
  -5  -3  -1 2574.44   63.69
  -5  -3  -1 2597.24   63.49
  -5  -3  -1 2719.93   81.29
  -5  -3  -1 2547.45   63.29
   5  -3   1 2709.73   76.99
   5  -3   1 2696.13   63.39
   5   3   2   90.69   16.30
  -5   3  -2   77.69   16.30
  -5   3  -2   82.49    4.30
  -5   3  -2   77.69    6.30
   5  -3   2   74.59    4.30
  -5  -3  -2   82.49    5.20
  -5  -3  -2   69.79   16.30
  -5  -3  -2   79.99    4.60
   5  -3   2   73.59   14.20
  -5   3  -3 1490.85   36.30
   5   3   3 1403.36   35.30
  -5   3  -3 1425.66   35.00
  -5   3  -3 1404.36   50.59
   5   3   3 1440.56   35.00
   5   3   3 1459.25   52.19
   5  -3   3 1445.56   50.99
  -5  -3  -3 1426.36   35.50
  -5  -3  -3 1391.56   35.40
  -5  -3  -3 1447.76   54.29
   5  -3   3 1470.55   35.50
  -5   3  -4  183.38    6.00
  -5   3  -4  193.48   24.50
   5   3   4  200.08    6.50
   5   3   4  195.88    6.30
  -5   3  -4  194.18    8.90
   5   3   4  153.38   23.40
  -5  -3  -4  189.28   22.80
  -5  -3  -4  195.78    7.80
   5  -3   4  186.28   20.70
   5  -3   4  192.98    7.60
  -5  -3  -4  199.08    7.30
   5   3   5  648.04   16.80
  -5   3  -5  663.43   16.80
  -5   3  -5  675.23   18.80
   5   3   5  656.03   34.70
  -5   3  -5  609.74   34.30
   5  -3   5  699.23   34.10
  -5  -3  -5  649.43   17.70
  -5  -3  -5  663.23   38.60
  -5  -3  -5  656.13   17.40
   5  -3   5  651.93   17.80
  -5   3  -6   92.89   21.60
   5   3   6   52.29   18.50
   5   3   6   73.99    5.00
  -5   3  -6   73.69    7.10
  -5   3  -6   77.99    4.60
  -5  -3  -6   90.19    5.80
   5  -3   6   63.49    6.80
   5  -3   6   78.99   17.00
  -5  -3  -6   81.89    7.10
  -5  -3  -6   69.19   20.60
   5   3   7  451.15   12.70
   5   3   7  454.75   31.90
  -5   3  -7  475.65   12.60
  -5   3  -7  459.65   15.20
  -5   3  -7  443.96   33.90
   5  -3   7  484.55   31.70
   5  -3   7  451.45   12.40
   5  -3   7  465.85   14.30
  -5  -3  -7  466.45   13.90
  -5  -3  -7  486.05   34.60
  -5  -3  -7  487.25   13.30
   5   3   8   32.90    3.90
  -5   3  -8   61.39   22.20
   5   3   8   35.60   18.50
  -5   3  -8   32.50    6.30
  -5   3  -8   44.60    4.60
   5  -3   8   24.30    5.60
   5  -3   8   36.90    4.20
  -5  -3  -8   39.60    4.10
  -5  -3  -8   39.60    6.10
  -5  -3  -8   35.30    3.40
  -5  -3  -8   46.90   23.70
   5  -3   8   45.30   21.10
   5   3   9  125.39    6.80
  -5   3  -9  117.29   26.70
  -5   3  -9  113.59    9.90
  -5   3  -9  136.19    6.50
   5   3   9  133.19   23.70
  -5  -3  -9  126.69    6.80
  -5  -3  -9  139.39   26.10
   5  -3   9  119.29    9.40
  -5  -3  -9  132.89    8.30
   5  -3   9  152.18   24.90
  -5  -3  -9  130.99    6.00
   5  -3   9  130.89    5.40
  -5   3 -10   38.00    4.30
   5   3  10   36.60    4.50
  -5   3 -10   41.50    7.30
  -5   3 -10   63.69   27.70
   5   3  10   83.69   25.50
   5  -3  10   34.30   24.80
  -5  -3 -10   37.60    6.00
   5  -3  10   28.20    6.70
   5  -3  10   41.60    4.30
  -5  -3 -10  -22.40   23.50
  -5  -3 -10   38.60    5.00
  -5  -3 -10   37.10    4.40
  -5   3 -11    9.00    4.20
  -5   3 -11   43.30   32.30
   5   3  11   12.90    4.40
   5   3  11   -4.60   27.00
  -5   3 -11    4.50    7.20
  -5  -3 -11    4.90    4.00
   5  -3  11   -3.00    6.70
   5  -3  11    7.60    2.60
  -5  -3 -11    8.70    6.70
   5  -3  11   14.60   24.60
  -5  -3 -11   20.30   30.80
  -5  -3 -11    3.30    3.20
   5   3  12   86.29    7.60
  -5   3 -12   73.89    9.00
  -5   3 -12   65.89    6.70
  -5   3 -12  125.59   35.50
  -5  -3 -12  108.39   37.60
  -5  -3 -12   80.09    6.90
   5  -3  12   72.89    8.40
   5  -3  12  133.99   31.80
  -5  -3 -12   82.89    8.20
   5  -3  12   79.79    5.70
  -5   3 -13   -4.80   42.20
  -5   3 -13    1.40    8.40
  -5   3 -13    9.40    8.50
   5   3  13    2.60    5.00
  -5  -3 -13   -3.00    4.20
  -5  -3 -13    2.60    6.80
   5  -3  13    6.10    7.80
   5  -3  13  -14.00   30.70
  -5   3 -14   22.10    5.20
   5   3  14   37.40    5.70
   5  -3  14   18.60    8.50
  -5  -3 -14   39.90    8.40
  -5  -3 -14   24.70    4.60
  -5   3 -15    4.20    5.50
   5   3  15    4.80    6.00
   5  -3  15   12.30    9.50
  -5  -3 -15    1.90    7.50
  -5   3 -16   -2.80    5.60
   5  -3  16    9.60    9.40
  -5  -3 -16    6.50    9.10
  -5  -3 -17    5.00    9.60
   5  -3  17    3.10   10.40
   5  -4 -18   -6.30    9.00
  -5  -4  18   -7.40   11.10
  -5  -4  17   14.30   10.70
   5  -4 -17   15.30    9.00
  -5  -4  16   -2.70    9.80
   5  -4 -16    5.10    7.30
   5  -4 -16   17.10    8.80
  -5  -4  15   21.90    9.30
   5  -4 -15   18.60    7.80
   5  -4 -15   33.20    6.40
  -5  -4  14   21.40    8.90
   5  -4 -14   18.10    7.40
   5  -4 -14   21.40    5.10
   5  -4 -14   24.80   28.10
   5   4 -13   -0.70    8.40
  -5   4  13   27.20   26.70
   5  -4 -13   -0.50    5.90
  -5  -4  13   -5.40    8.20
   5  -4 -13   -9.10   22.90
   5  -4 -13    6.80    4.60
  -5  -4  13   -2.80   24.10
  -5   4  12    9.70   24.20
   5   4 -12   15.70    8.10
  -5  -4  12   13.20    2.40
  -5  -4  12    1.70    7.60
  -5  -4  12   50.59   22.80
   5  -4 -12   23.20    6.50
   5  -4 -12  -15.70   19.70
   5  -4 -12   21.60    4.70
   5   4 -11    6.60    7.30
   5  -4 -11    7.20    4.30
  -5  -4  11    0.10    7.00
  -5  -4  11    7.00    2.60
   5  -4 -11    2.60    5.20
   5  -4 -11    2.60   17.10
  -5  -4  11    2.60   20.20
   5  -4 -11    6.10    2.00
   5   4 -10   71.79    7.90
  -5   4  10   28.90   19.10
   5  -4 -10   64.29    3.30
   5  -4 -10   61.19    6.50
   5  -4 -10   82.59   18.20
  -5  -4  10   61.29    6.60
  -5  -4  10   72.09    4.40
   5  -4 -10   75.09    8.00
  -5  -4  10   81.59   22.50
   5  -4 -10   59.39    4.40
   5   4  -9   17.20    6.40
  -5   4   9   20.70   17.10
  -5  -4   9   21.30    3.00
   5  -4  -9   17.90    1.90
   5  -4  -9    7.90    4.60
  -5  -4   9   12.00    6.00
   5  -4  -9   10.20    3.20
   5  -4  -9    4.40   15.20
   5  -4  -9   14.50    4.20
  -5  -4   9   20.30   20.20
  -5   4   8  285.97   26.60
   5   4  -8  253.67   11.90
  -5   4   8  260.07    8.30
[truncated: 3,377,299 more chars]
